# Supplementary material
Source: publisher figshare collection journal article supplement (https://acs.figshare.com/ndownloader/files/28369422)
Supplement: Supplementary file 1 [file 28369422]

data_190712_s3_xzh_133k
_audit_creation_date               2019-07-13
_audit_creation_method
;
Olex2 1.2
(compiled 2018.05.29 svn.r3508 for OlexSys, GUI svn.r5506)
;
_shelx_SHELXL_version_number       '2014/7'
_audit_contact_author_address      ?
_audit_contact_author_email        ?
_audit_contact_author_name         ''
_audit_contact_author_phone        ?
_publ_contact_author_id_orcid      ?
_publ_section_references
;
Dolomanov, O.V., Bourhis, L.J., Gildea, R.J, Howard, J.A.K. & Puschmann, H.
 (2009), J. Appl. Cryst. 42, 339-341.

Sheldrick, G.M. (2008). Acta Cryst. A64, 112-122.

Sheldrick, G.M. (2015). Acta Cryst. C71, 3-8.
;
_chemical_name_common              ?
_chemical_name_systematic
;
 ? 
;
_chemical_formula_moiety           'C20 H22 Eu N2 Na O14, 2(H2 O)'
_chemical_formula_sum              'C20 H26 Eu N2 Na O16'
_chemical_formula_weight           725.38
_chemical_melting_point            ?
_chemical_oxdiff_formula           c12h12n2o3eu1
loop_
  _atom_type_symbol
  _atom_type_description
  _atom_type_scat_dispersion_real
  _atom_type_scat_dispersion_imag
  _atom_type_scat_source
 'C' 'C' 0.0033 0.0016 'International Tables Vol C Tables 4.2.6.8 and 6.1.1.4'
 'H' 'H' 0.0000 0.0000 'International Tables Vol C Tables 4.2.6.8 and 6.1.1.4'
 'Eu' 'Eu' -0.1578 3.6682
 'International Tables Vol C Tables 4.2.6.8 and 6.1.1.4'
 'N' 'N' 0.0061 0.0033 'International Tables Vol C Tables 4.2.6.8 and 6.1.1.4'
 'Na' 'Na' 0.0362 0.0249 'International Tables Vol C Tables 4.2.6.8 and 6.1.1.4'
 'O' 'O' 0.0106 0.0060 'International Tables Vol C Tables 4.2.6.8 and 6.1.1.4'

_shelx_space_group_comment
;
The symmetry employed for this shelxl refinement is uniquely defined
by the following loop, which should always be used as a source of
symmetry information in preference to the above space-group names.
They are only intended as comments.
;
_space_group_crystal_system        'monoclinic'
_space_group_IT_number             14
_space_group_name_H-M_alt          'P 1 21/c 1'
_space_group_name_Hall             '-P 2ybc'
loop_
  _space_group_symop_operation_xyz
 'x, y, z'
 '-x, y+1/2, -z+1/2'
 '-x, -y, -z'
 'x, -y-1/2, z-1/2'

_cell_length_a                     13.9676(11)
_cell_length_b                     17.5752(14)
_cell_length_c                     11.2382(9)
_cell_angle_alpha                  90
_cell_angle_beta                   102.643(8)
_cell_angle_gamma                  90
_cell_volume                       2691.9(4)
_cell_formula_units_Z              4
_cell_measurement_reflns_used      4714
_cell_measurement_temperature      127(6)
_cell_measurement_theta_max        29.1600
_cell_measurement_theta_min        3.3330
_shelx_estimated_absorpt_T_max     0.712
_shelx_estimated_absorpt_T_min     0.484
_exptl_absorpt_coefficient_mu      2.425
_exptl_absorpt_correction_T_max    1.00000
_exptl_absorpt_correction_T_min    0.64734
_exptl_absorpt_correction_type     multi-scan
_exptl_absorpt_process_details
;
CrysAlisPro, Agilent Technologies,
Version 1.171.37.35 (release 13-08-2014 CrysAlis171 .NET)
(compiled Aug 13 2014,18:06:01)
Empirical absorption correction using spherical harmonics,
 implemented in SCALE3 ABSPACK scaling algorithm.
;
_exptl_absorpt_special_details     ?
_exptl_crystal_colour              ?
_exptl_crystal_density_diffrn      1.790
_exptl_crystal_density_meas        ?
_exptl_crystal_density_method      'not measured'
_exptl_crystal_description         ''
_exptl_crystal_F_000               1448
_exptl_crystal_size_max            0.35
_exptl_crystal_size_mid            0.3
_exptl_crystal_size_min            0.15
_exptl_special_details
;
 ? 
;
_exptl_transmission_factor_max     ?
_exptl_transmission_factor_min     ?
_diffrn_reflns_av_R_equivalents    0.0305
_diffrn_reflns_av_unetI/netI       0.0426
_diffrn_reflns_Laue_measured_fraction_full  0.998
_diffrn_reflns_Laue_measured_fraction_max  0.998
_diffrn_reflns_limit_h_max         17
_diffrn_reflns_limit_h_min         -17
_diffrn_reflns_limit_k_max         21
_diffrn_reflns_limit_k_min         -21
_diffrn_reflns_limit_l_max         14
_diffrn_reflns_limit_l_min         -13
_diffrn_reflns_number              12677
_diffrn_reflns_point_group_measured_fraction_full  0.998
_diffrn_reflns_point_group_measured_fraction_max  0.998
_diffrn_reflns_theta_full          25.242
_diffrn_reflns_theta_max           26.371
_diffrn_reflns_theta_min           2.989
_diffrn_ambient_environment        N~2~
_diffrn_ambient_temperature        127(6)
_diffrn_detector                   'CCD plate'
_diffrn_detector_area_resol_mean   16.0874
_diffrn_detector_type              Eos
_diffrn_measured_fraction_theta_full  0.998
_diffrn_measured_fraction_theta_max  0.998
_diffrn_measurement_details
;
#__ type_ start__ end____ width___ exp.time_
  1 omega    2.00   84.00   1.0000    1.0000
omega____ theta____ kappa____ phi______ frames
    -       17.0762   57.0000 -120.0000 82

#__ type_ start__ end____ width___ exp.time_
  2 omega  -50.00   34.00   1.0000    1.0000
omega____ theta____ kappa____ phi______ frames
    -       17.0762  -57.0000  120.0000 84

#__ type_ start__ end____ width___ exp.time_
  3 omega  -60.00  -35.00   1.0000    1.0000
omega____ theta____ kappa____ phi______ frames
    -      -14.8106 -178.0000  -90.0000 25

#__ type_ start__ end____ width___ exp.time_
  4 omega  -72.00  -36.00   1.0000    1.0000
omega____ theta____ kappa____ phi______ frames
    -      -14.8106 -178.0000  150.0000 36
;
_diffrn_measurement_device         'four-circle diffractometer'
_diffrn_measurement_device_type    'Xcalibur, Eos'
_diffrn_measurement_method         '\w scans'
_diffrn_orient_matrix_UB_11        -0.0060278000
_diffrn_orient_matrix_UB_12        0.0085464000
_diffrn_orient_matrix_UB_13        0.0596215000
_diffrn_orient_matrix_UB_21        -0.0504665000
_diffrn_orient_matrix_UB_22        -0.0093836000
_diffrn_orient_matrix_UB_23        -0.0179062000
_diffrn_orient_matrix_UB_31        0.0110646000
_diffrn_orient_matrix_UB_32        -0.0382959000
_diffrn_orient_matrix_UB_33        0.0177292000
_diffrn_radiation_monochromator    graphite
_diffrn_radiation_probe            x-ray
_diffrn_radiation_type             MoK\a
_diffrn_radiation_wavelength       0.71073
_diffrn_source                     'Enhance (Mo) X-ray Source'
_reflns_Friedel_coverage           0.000
_reflns_Friedel_fraction_full      .
_reflns_Friedel_fraction_max       .
_reflns_number_gt                  4724
_reflns_number_total               5487
_reflns_odcompleteness_completeness  99.79
_reflns_odcompleteness_iscentric   1
_reflns_odcompleteness_theta       26.32
_reflns_special_details
;
 Reflections were merged by SHELXL according to the crystal
 class for the calculation of statistics and refinement.
 
 _reflns_Friedel_fraction is defined as the number of unique
 Friedel pairs measured divided by the number that would be
 possible theoretically, ignoring centric projections and
 systematic absences.
;
_reflns_threshold_expression       'I > 2\s(I)'
_computing_cell_refinement
;
CrysAlisPro, Agilent Technologies,
Version 1.171.37.35 (release 13-08-2014 CrysAlis171 .NET)
(compiled Aug 13 2014,18:06:01)
;
_computing_data_collection
;
CrysAlisPro, Agilent Technologies,
Version 1.171.37.35 (release 13-08-2014 CrysAlis171 .NET)
(compiled Aug 13 2014,18:06:01)
;
_computing_data_reduction
;
CrysAlisPro, Agilent Technologies,
Version 1.171.37.35 (release 13-08-2014 CrysAlis171 .NET)
(compiled Aug 13 2014,18:06:01)
;
_computing_molecular_graphics      'Olex2 (Dolomanov et al., 2009)'
_computing_publication_material    'Olex2 (Dolomanov et al., 2009)'
_computing_structure_refinement    'ShelXL (Sheldrick, 2015)'
_computing_structure_solution      'ShelXS (Sheldrick, 2008)'
_refine_diff_density_max           0.812
_refine_diff_density_min           -0.743
_refine_diff_density_rms           0.102
_refine_ls_extinction_coef         .
_refine_ls_extinction_method       none
_refine_ls_goodness_of_fit_ref     1.051
_refine_ls_hydrogen_treatment      constr
_refine_ls_matrix_type             full
_refine_ls_number_parameters       380
_refine_ls_number_reflns           5487
_refine_ls_number_restraints       0
_refine_ls_R_factor_all            0.0362
_refine_ls_R_factor_gt             0.0280
_refine_ls_restrained_S_all        1.051
_refine_ls_shift/su_max            0.001
_refine_ls_shift/su_mean           0.000
_refine_ls_structure_factor_coef   Fsqd
_refine_ls_weighting_details      
 'w=1/[\s^2^(Fo^2^)+(0.0285P)^2^+0.9335P] where P=(Fo^2^+2Fc^2^)/3'
_refine_ls_weighting_scheme        calc
_refine_ls_wR_factor_gt            0.0629
_refine_ls_wR_factor_ref           0.0676
_refine_special_details            ?
_olex2_refinement_description
;
1. Fixed Uiso
 At 1.2 times of:
  All C(H) groups, All C(H,H) groups
 At 1.5 times of:
  All O(H,H) groups
2. Uiso/Uaniso restraints and constraints
Uanis(C10) = Uanis(C10A)
Uanis(C20) = Uanis(C20A)
3. Others
 Sof(H9B)=Sof(H19A)=Sof(C10A)=Sof(H10C)=Sof(H10D)=Sof(C20A)=Sof(H20C)=
 Sof(H20D)=1-FVAR(1)
 Sof(H9A)=Sof(H19)=Sof(C10)=Sof(H10A)=Sof(H10B)=Sof(C20)=Sof(H20A)=Sof(H20B)=
 FVAR(1)
4.a Free rotating group:
 O14(H14A,H14B), O15(H15A,H15B), O16(H16A,H16B)
4.b Rotating group:
 O11(H11A,H11B), O12(H12A,H12B), O13(H13A,H13B)
4.c Secondary CH2 refined with riding coordinates:
 C8(H8A,H8B), C18(H18A,H18B)
4.d Aromatic/amide H refined with riding coordinates:
 C2(H2), C4(H4), C9(H9A), C9(H9B), C12(H12), C14(H14), C19(H19), C19(H19A)
4.e X=CH2 refined with riding coordinates:
 C10(H10A,H10B), C20(H20A,H20B), C10A(H10C,H10D), C20A(H20C,H20D)
;
_atom_sites_solution_hydrogens     mixed
_atom_sites_solution_primary       direct
_atom_sites_solution_secondary     ?
loop_
  _atom_site_label
  _atom_site_type_symbol
  _atom_site_fract_x
  _atom_site_fract_y
  _atom_site_fract_z
  _atom_site_U_iso_or_equiv
  _atom_site_adp_type
  _atom_site_occupancy
  _atom_site_site_symmetry_order
  _atom_site_calc_flag
  _atom_site_refinement_flags_posn
  _atom_site_refinement_flags_adp
  _atom_site_refinement_flags_occupancy
  _atom_site_disorder_assembly
  _atom_site_disorder_group
 Eu1 Eu 0.41440(2) 0.32086(2) 0.71584(2) 0.01491(6) Uani 1 1 d . . . . .
 O1 O 0.7646(2) 0.48893(15) 1.1263(2) 0.0423(7) Uani 1 1 d . . . . .
 O2 O 0.41182(16) 0.45948(13) 0.72441(18) 0.0214(5) Uani 1 1 d . . . . .
 O3 O 0.48211(18) 0.57162(12) 0.7823(2) 0.0267(5) Uani 1 1 d . . . . .
 O4 O 0.52518(17) 0.23582(12) 0.85222(18) 0.0203(5) Uani 1 1 d . . . . .
 O5 O 0.66131(18) 0.21205(13) 0.9943(2) 0.0272(6) Uani 1 1 d . . . . .
 O6 O -0.0680(2) 0.3628(2) 0.6112(2) 0.0663(11) Uani 1 1 d . . . . .
 O7 O 0.32732(17) 0.33655(13) 0.50448(19) 0.0221(5) Uani 1 1 d . . . . .
 O8 O 0.18918(19) 0.34043(16) 0.3597(2) 0.0327(6) Uani 1 1 d . . . . .
 O9 O 0.34719(17) 0.33118(12) 0.89658(19) 0.0201(5) Uani 1 1 d . . . . .
 O10 O 0.22363(18) 0.34495(14) 0.99217(19) 0.0267(6) Uani 1 1 d . . . . .
 O11 O 0.53416(17) 0.37217(13) 0.59871(19) 0.0247(5) Uani 1 1 d . . . . .
 H11A H 0.5827 0.3400 0.6015 0.037 Uiso 1 1 d GR . . . .
 H11B H 0.5638 0.4131 0.6340 0.037 Uiso 1 1 d GR . . . .
 O12 O 0.47232(17) 0.21781(12) 0.60003(18) 0.0203(5) Uani 1 1 d . . . . .
 H12A H 0.4756 0.1761 0.6403 0.030 Uiso 1 1 d GR . . . .
 H12B H 0.5318 0.2264 0.5950 0.030 Uiso 1 1 d GR . . . .
 O13 O 0.32322(17) 0.19700(12) 0.7240(2) 0.0223(5) Uani 1 1 d . . . . .
 H13A H 0.2961 0.1850 0.6481 0.033 Uiso 1 1 d GR . . . .
 H13B H 0.2736 0.1996 0.7600 0.033 Uiso 1 1 d GR . . . .
 N1 N 0.5492(2) 0.38285(14) 0.8713(2) 0.0170(6) Uani 1 1 d . . . . .
 N2 N 0.2335(2) 0.34684(15) 0.6813(2) 0.0191(6) Uani 1 1 d . . . . .
 C1 C 0.5554(2) 0.45891(18) 0.8815(3) 0.0168(7) Uani 1 1 d . . . . .
 C2 C 0.6277(3) 0.49473(19) 0.9655(3) 0.0245(8) Uani 1 1 d . . . . .
 H2 H 0.6301 0.5475 0.9702 0.029 Uiso 1 1 calc R . . . .
 C3 C 0.6973(3) 0.4508(2) 1.0432(3) 0.0257(8) Uani 1 1 d . . . . .
 C4 C 0.6929(2) 0.37176(19) 1.0320(3) 0.0228(7) Uani 1 1 d . . . . .
 H4 H 0.7395 0.3409 1.0810 0.027 Uiso 1 1 calc R . . . .
 C5 C 0.6173(2) 0.34095(18) 0.9458(3) 0.0184(7) Uani 1 1 d . . . . .
 C6 C 0.4769(3) 0.50157(18) 0.7899(3) 0.0201(7) Uani 1 1 d . . . . .
 C7 C 0.6021(2) 0.25555(18) 0.9303(3) 0.0187(7) Uani 1 1 d . . . . .
 C8 C 0.8325(4) 0.4471(3) 1.2185(4) 0.0573(14) Uani 1 1 d . . . . .
 H8A H 0.8523 0.4789 1.2902 0.069 Uiso 1 1 calc R . . . .
 H8B H 0.7996 0.4027 1.2416 0.069 Uiso 1 1 calc R . . . .
 C9 C 0.9184(5) 0.4230(4) 1.1783(7) 0.091(2) Uani 1 1 d . . . . .
 H9A H 0.9653 0.3975 1.2360 0.109 Uiso 0.729(7) 1 calc R . P A 1
 H9B H 0.9564 0.4658 1.1730 0.109 Uiso 0.271(7) 1 calc R . P A 2
 C11 C 0.1773(3) 0.3480(2) 0.5676(3) 0.0222(7) Uani 1 1 d . . . . .
 C12 C 0.0768(3) 0.3527(2) 0.5438(3) 0.0339(9) Uani 1 1 d . . . . .
 H12 H 0.0403 0.3532 0.4640 0.041 Uiso 1 1 calc R . . . .
 C13 C 0.0303(3) 0.3568(3) 0.6420(3) 0.0363(10) Uani 1 1 d . . . . .
 C14 C 0.0879(3) 0.3538(2) 0.7597(3) 0.0274(8) Uani 1 1 d . . . . .
 H14 H 0.0593 0.3554 0.8270 0.033 Uiso 1 1 calc R . . . .
 C15 C 0.1881(2) 0.34824(18) 0.7746(3) 0.0184(7) Uani 1 1 d . . . . .
 C16 C 0.2356(3) 0.3416(2) 0.4676(3) 0.0217(7) Uani 1 1 d . . . . .
 C17 C 0.2570(3) 0.34142(18) 0.8989(3) 0.0189(7) Uani 1 1 d . . . . .
 C18 C -0.1218(3) 0.3720(4) 0.7052(4) 0.0721(19) Uani 1 1 d . . . . .
 H18A H -0.1849 0.3950 0.6706 0.086 Uiso 1 1 calc R . . . .
 H18B H -0.0862 0.4063 0.7669 0.086 Uiso 1 1 calc R . . . .
 C19 C -0.1376(6) 0.2980(6) 0.7634(8) 0.124(3) Uani 1 1 d . . . . .
 H19 H -0.1512 0.2582 0.7079 0.149 Uiso 0.729(7) 1 calc R . P A 1
 H19A H -0.0816 0.2679 0.7761 0.149 Uiso 0.271(7) 1 calc R . P A 2
 C10 C 0.9375(6) 0.4315(5) 1.0802(8) 0.086(3) Uani 0.729(7) 1 d . . P A 1
 H10A H 0.8936 0.4566 1.0185 0.103 Uiso 0.729(7) 1 calc R . P A 1
 H10B H 0.9963 0.4130 1.0658 0.103 Uiso 0.729(7) 1 calc R . P A 1
 C20 C -0.1368(8) 0.2797(8) 0.8609(11) 0.111(3) Uani 0.729(7) 1 d . . P A 1
 H20A H -0.1239 0.3151 0.9238 0.133 Uiso 0.729(7) 1 calc R . P A 1
 H20B H -0.1490 0.2292 0.8776 0.133 Uiso 0.729(7) 1 calc R . P A 1
 C10A C 0.9662(16) 0.3601(16) 1.1444(19) 0.086(3) Uani 0.271(7) 1 d . . P A 2
 H10C H 0.9386 0.3119 1.1444 0.103 Uiso 0.271(7) 1 calc R . P A 2
 H10D H 1.0260 0.3660 1.1218 0.103 Uiso 0.271(7) 1 calc R . P A 2
 C20A C -0.206(2) 0.265(2) 0.800(3) 0.111(3) Uani 0.271(7) 1 d . . P A 2
 H20C H -0.2666 0.2888 0.7932 0.133 Uiso 0.271(7) 1 calc R . P A 2
 H20D H -0.1962 0.2166 0.8349 0.133 Uiso 0.271(7) 1 calc R . P A 2
 Na1 Na 0.55983(10) 0.62281(7) 0.62335(11) 0.0253(3) Uani 1 1 d . . . . .
 O14 O 0.64319(19) 0.50393(15) 0.6466(2) 0.0316(6) Uani 1 1 d . . . . .
 H14A H 0.6877 0.5181 0.7069 0.047 Uiso 1 1 d G . . . .
 H14B H 0.6695 0.4890 0.5892 0.047 Uiso 1 1 d G . . . .
 O15 O 0.7073(2) 0.44967(17) 0.4527(2) 0.0444(7) Uani 1 1 d . . . . .
 H15A H 0.6989 0.4018 0.4468 0.067 Uiso 1 1 d G . . . .
 H15B H 0.6683 0.4715 0.3939 0.067 Uiso 1 1 d G . . . .
 O16 O 0.8113(2) 0.54076(17) 0.8284(3) 0.0488(8) Uani 1 1 d . . . . .
 H16A H 0.8016 0.5665 0.8887 0.073 Uiso 1 1 d G . . . .
 H16B H 0.8412 0.5681 0.7858 0.073 Uiso 1 1 d G . . . .

loop_
  _atom_site_aniso_label
  _atom_site_aniso_U_11
  _atom_site_aniso_U_22
  _atom_site_aniso_U_33
  _atom_site_aniso_U_23
  _atom_site_aniso_U_13
  _atom_site_aniso_U_12
 Eu1 0.01830(10) 0.01424(10) 0.01172(9) 0.00021(6) 0.00225(6) -0.00121(6)
 O1 0.0434(18) 0.0273(15) 0.0432(15) -0.0058(13) -0.0187(13) -0.0072(13)
 O2 0.0233(13) 0.0167(12) 0.0207(11) 0.0017(10) -0.0027(10) -0.0006(10)
 O3 0.0383(16) 0.0121(12) 0.0287(12) 0.0018(10) 0.0057(11) -0.0017(11)
 O4 0.0253(13) 0.0149(11) 0.0190(11) -0.0001(10) 0.0009(10) -0.0016(10)
 O5 0.0259(14) 0.0205(13) 0.0306(13) 0.0058(11) -0.0036(11) 0.0022(11)
 O6 0.0215(16) 0.145(3) 0.0308(16) -0.0077(19) 0.0027(12) 0.0154(19)
 O7 0.0217(13) 0.0289(13) 0.0154(11) 0.0007(10) 0.0034(10) 0.0003(10)
 O8 0.0279(15) 0.0564(18) 0.0129(12) 0.0000(12) 0.0023(10) 0.0055(13)
 O9 0.0204(13) 0.0250(13) 0.0138(11) -0.0008(9) 0.0018(9) 0.0003(10)
 O10 0.0318(15) 0.0363(14) 0.0133(11) -0.0005(11) 0.0073(10) 0.0027(12)
 O11 0.0266(14) 0.0203(12) 0.0291(13) -0.0056(11) 0.0104(11) -0.0042(10)
 O12 0.0242(13) 0.0186(12) 0.0198(11) 0.0028(10) 0.0085(10) -0.0008(10)
 O13 0.0275(14) 0.0233(12) 0.0175(11) -0.0030(10) 0.0079(10) -0.0049(10)
 N1 0.0213(15) 0.0147(13) 0.0142(12) 0.0000(11) 0.0021(11) -0.0007(11)
 N2 0.0221(16) 0.0210(15) 0.0136(13) -0.0013(12) 0.0026(11) 0.0004(12)
 C1 0.0212(18) 0.0153(16) 0.0144(15) -0.0011(13) 0.0052(13) -0.0007(13)
 C2 0.029(2) 0.0185(18) 0.0258(17) -0.0051(15) 0.0043(15) -0.0041(15)
 C3 0.027(2) 0.0275(19) 0.0204(16) -0.0027(15) 0.0008(15) -0.0080(16)
 C4 0.0210(19) 0.0217(18) 0.0231(17) -0.0001(15) -0.0012(14) -0.0001(14)
 C5 0.0210(18) 0.0171(16) 0.0172(16) 0.0004(14) 0.0045(13) -0.0022(14)
 C6 0.0252(19) 0.0190(18) 0.0178(16) 0.0004(14) 0.0083(14) 0.0025(15)
 C7 0.0215(18) 0.0186(17) 0.0169(15) 0.0010(14) 0.0061(13) -0.0011(14)
 C8 0.062(3) 0.046(3) 0.045(3) 0.001(2) -0.029(2) -0.010(2)
 C9 0.049(4) 0.086(5) 0.117(6) 0.019(5) -0.024(4) -0.008(3)
 C11 0.0243(19) 0.0283(19) 0.0119(15) -0.0012(14) -0.0006(13) 0.0019(15)
 C12 0.025(2) 0.059(3) 0.0153(17) 0.0006(18) -0.0008(15) 0.0091(19)
 C13 0.020(2) 0.063(3) 0.0253(19) -0.0053(19) 0.0033(15) 0.0054(19)
 C14 0.026(2) 0.041(2) 0.0162(16) -0.0016(16) 0.0057(14) 0.0029(17)
 C15 0.0216(18) 0.0181(17) 0.0151(15) -0.0010(14) 0.0032(13) 0.0002(14)
 C16 0.025(2) 0.0238(18) 0.0156(16) 0.0027(14) 0.0032(14) 0.0010(15)
 C17 0.027(2) 0.0143(16) 0.0152(16) -0.0011(13) 0.0049(14) -0.0015(14)
 C18 0.022(2) 0.151(6) 0.044(3) -0.005(3) 0.008(2) 0.024(3)
 C19 0.088(6) 0.204(10) 0.091(5) -0.021(6) 0.044(5) -0.065(6)
 C10 0.051(5) 0.129(8) 0.070(5) 0.023(5) -0.003(4) 0.001(5)
 C20 0.080(8) 0.152(9) 0.104(9) -0.010(8) 0.028(6) -0.005(8)
 C10A 0.051(5) 0.129(8) 0.070(5) 0.023(5) -0.003(4) 0.001(5)
 C20A 0.080(8) 0.152(9) 0.104(9) -0.010(8) 0.028(6) -0.005(8)
 Na1 0.0332(8) 0.0201(7) 0.0233(7) 0.0006(6) 0.0076(6) 0.0016(6)
 O14 0.0351(16) 0.0257(14) 0.0340(14) -0.0040(12) 0.0075(12) -0.0037(12)
 O15 0.053(2) 0.0446(18) 0.0306(14) 0.0045(14) -0.0011(13) 0.0063(16)
 O16 0.051(2) 0.0499(19) 0.0476(18) -0.0018(15) 0.0143(15) 0.0057(16)

_geom_special_details
;
 All esds (except the esd in the dihedral angle between two l.s. planes)
 are estimated using the full covariance matrix.  The cell esds are taken
 into account individually in the estimation of esds in distances, angles
 and torsion angles; correlations between esds in cell parameters are only
 used when they are defined by crystal symmetry.  An approximate (isotropic)
 treatment of cell esds is used for estimating esds involving l.s. planes.
;
loop_
  _geom_bond_atom_site_label_1
  _geom_bond_atom_site_label_2
  _geom_bond_distance
  _geom_bond_site_symmetry_2
  _geom_bond_publ_flag
 Eu1 O2 2.439(2) . ?
 Eu1 O4 2.437(2) . ?
 Eu1 O7 2.436(2) . ?
 Eu1 O9 2.424(2) . ?
 Eu1 O11 2.512(2) . ?
 Eu1 O12 2.468(2) . ?
 Eu1 O13 2.534(2) . ?
 Eu1 N1 2.518(3) . ?
 Eu1 N2 2.513(3) . ?
 Eu1 Na1 4.0300(13) 3_666 ?
 Eu1 Na1 3.9022(13) 2_646 ?
 O1 C3 1.349(4) . ?
 O1 C8 1.444(5) . ?
 O2 C6 1.274(4) . ?
 O3 C6 1.237(4) . ?
 O3 Na1 2.455(3) . ?
 O4 C7 1.277(4) . ?
 O4 Na1 2.361(3) 2_646 ?
 O5 C7 1.236(4) . ?
 O6 C13 1.345(4) . ?
 O6 C18 1.432(5) . ?
 O7 C16 1.260(4) . ?
 O7 Na1 2.460(3) 3_666 ?
 O8 C16 1.244(4) . ?
 O9 C17 1.279(4) . ?
 O10 C17 1.239(4) . ?
 O11 Na1 2.554(3) 3_666 ?
 O13 Na1 2.467(3) 2_646 ?
 N1 C1 1.343(4) . ?
 N1 C5 1.342(4) . ?
 N2 C11 1.345(4) . ?
 N2 C15 1.339(4) . ?
 C1 C2 1.374(4) . ?
 C1 C6 1.527(4) . ?
 C2 C3 1.390(5) . ?
 C3 C4 1.395(5) . ?
 C4 C5 1.378(4) . ?
 C5 C7 1.521(4) . ?
 C8 C9 1.434(8) . ?
 C9 C10 1.200(9) . ?
 C9 C10A 1.39(3) . ?
 C11 C12 1.373(5) . ?
 C11 C16 1.529(5) . ?
 C12 C13 1.400(5) . ?
 C13 C14 1.390(5) . ?
 C14 C15 1.377(5) . ?
 C15 C17 1.517(4) . ?
 C18 C19 1.494(10) . ?
 C19 C20 1.140(11) . ?
 C19 C20A 1.27(3) . ?
 Na1 Eu1 4.0300(13) 3_666 ?
 Na1 Eu1 3.9022(13) 2_656 ?
 Na1 O4 2.361(3) 2_656 ?
 Na1 O7 2.460(3) 3_666 ?
 Na1 O11 2.554(3) 3_666 ?
 Na1 O13 2.467(3) 2_656 ?
 Na1 O14 2.378(3) . ?

loop_
  _geom_angle_atom_site_label_1
  _geom_angle_atom_site_label_2
  _geom_angle_atom_site_label_3
  _geom_angle
  _geom_angle_site_symmetry_1
  _geom_angle_site_symmetry_3
  _geom_angle_publ_flag
 O2 Eu1 O11 71.30(7) . . ?
 O2 Eu1 O12 139.77(7) . . ?
 O2 Eu1 O13 147.66(7) . . ?
 O2 Eu1 N1 63.62(8) . . ?
 O2 Eu1 N2 78.55(8) . . ?
 O2 Eu1 Na1 78.30(5) . 3_666 ?
 O2 Eu1 Na1 150.86(5) . 2_646 ?
 O4 Eu1 O2 126.92(7) . . ?
 O4 Eu1 O11 98.38(8) . . ?
 O4 Eu1 O12 69.22(7) . . ?
 O4 Eu1 O13 72.87(7) . . ?
 O4 Eu1 N1 63.50(8) . . ?
 O4 Eu1 N2 133.41(8) . . ?
 O4 Eu1 Na1 124.73(5) . 3_666 ?
 O4 Eu1 Na1 34.93(6) . 2_646 ?
 O7 Eu1 O2 85.23(7) . . ?
 O7 Eu1 O4 142.71(7) . . ?
 O7 Eu1 O11 72.30(8) . . ?
 O7 Eu1 O12 73.75(7) . . ?
 O7 Eu1 O13 89.13(7) . . ?
 O7 Eu1 N1 139.93(8) . . ?
 O7 Eu1 N2 63.78(8) . . ?
 O7 Eu1 Na1 34.78(6) . 3_666 ?
 O7 Eu1 Na1 121.90(6) . 2_646 ?
 O9 Eu1 O2 83.13(7) . . ?
 O9 Eu1 O4 80.09(7) . . ?
 O9 Eu1 O7 127.33(8) . . ?
 O9 Eu1 O11 146.82(7) . . ?
 O9 Eu1 O12 136.78(7) . . ?
 O9 Eu1 O13 75.18(7) . . ?
 O9 Eu1 N1 75.77(8) . . ?
 O9 Eu1 N2 63.59(8) . . ?
 O9 Eu1 Na1 154.89(6) . 3_666 ?
 O9 Eu1 Na1 72.06(5) . 2_646 ?
 O11 Eu1 O13 136.47(7) . . ?
 O11 Eu1 N1 74.08(8) . . ?
 O11 Eu1 N2 128.05(8) . . ?
 O11 Eu1 Na1 37.67(5) . 3_666 ?
 O11 Eu1 Na1 123.95(6) . 2_646 ?
 O12 Eu1 O11 69.77(7) . . ?
 O12 Eu1 O13 67.28(7) . . ?
 O12 Eu1 N1 113.69(8) . . ?
 O12 Eu1 N2 119.11(8) . . ?
 O12 Eu1 Na1 64.78(5) . 3_666 ?
 O12 Eu1 Na1 65.28(5) . 2_646 ?
 O13 Eu1 Na1 38.10(6) . 2_646 ?
 O13 Eu1 Na1 113.25(5) . 3_666 ?
 N1 Eu1 O13 130.69(8) . . ?
 N1 Eu1 Na1 94.90(6) . 2_646 ?
 N1 Eu1 Na1 109.99(6) . 3_666 ?
 N2 Eu1 O13 70.44(8) . . ?
 N2 Eu1 N1 127.04(8) . . ?
 N2 Eu1 Na1 95.98(6) . 3_666 ?
 N2 Eu1 Na1 102.79(7) . 2_646 ?
 Na1 Eu1 Na1 129.71(2) 2_646 3_666 ?
 C3 O1 C8 119.5(3) . . ?
 C6 O2 Eu1 126.0(2) . . ?
 C6 O3 Na1 117.2(2) . . ?
 C7 O4 Eu1 126.0(2) . . ?
 C7 O4 Na1 121.2(2) . 2_646 ?
 Na1 O4 Eu1 108.84(9) 2_646 . ?
 C13 O6 C18 119.3(3) . . ?
 Eu1 O7 Na1 110.82(9) . 3_666 ?
 C16 O7 Eu1 125.7(2) . . ?
 C16 O7 Na1 121.5(2) . 3_666 ?
 C17 O9 Eu1 126.26(19) . . ?
 Eu1 O11 Na1 105.40(9) . 3_666 ?
 Na1 O13 Eu1 102.57(9) 2_646 . ?
 C1 N1 Eu1 121.0(2) . . ?
 C5 N1 Eu1 121.1(2) . . ?
 C5 N1 C1 117.9(3) . . ?
 C11 N2 Eu1 120.5(2) . . ?
 C15 N2 Eu1 121.0(2) . . ?
 C15 N2 C11 117.8(3) . . ?
 N1 C1 C2 122.6(3) . . ?
 N1 C1 C6 114.0(3) . . ?
 C2 C1 C6 123.3(3) . . ?
 C1 C2 C3 119.0(3) . . ?
 O1 C3 C2 116.4(3) . . ?
 O1 C3 C4 124.6(3) . . ?
 C2 C3 C4 119.1(3) . . ?
 C5 C4 C3 117.8(3) . . ?
 N1 C5 C4 123.6(3) . . ?
 N1 C5 C7 114.0(3) . . ?
 C4 C5 C7 122.4(3) . . ?
 O2 C6 C1 114.9(3) . . ?
 O3 C6 O2 125.7(3) . . ?
 O3 C6 C1 119.4(3) . . ?
 O4 C7 C5 115.0(3) . . ?
 O5 C7 O4 126.0(3) . . ?
 O5 C7 C5 119.0(3) . . ?
 C9 C8 O1 112.8(5) . . ?
 C10 C9 C8 128.5(7) . . ?
 C10A C9 C8 143.8(12) . . ?
 N2 C11 C12 123.0(3) . . ?
 N2 C11 C16 113.8(3) . . ?
 C12 C11 C16 123.2(3) . . ?
 C11 C12 C13 118.8(3) . . ?
 O6 C13 C12 115.2(3) . . ?
 O6 C13 C14 126.4(3) . . ?
 C14 C13 C12 118.4(3) . . ?
 C15 C14 C13 118.7(3) . . ?
 N2 C15 C14 123.3(3) . . ?
 N2 C15 C17 114.0(3) . . ?
 C14 C15 C17 122.7(3) . . ?
 O7 C16 C11 115.5(3) . . ?
 O8 C16 O7 126.5(3) . . ?
 O8 C16 C11 118.1(3) . . ?
 O9 C17 C15 114.9(3) . . ?
 O10 C17 O9 125.4(3) . . ?
 O10 C17 C15 119.7(3) . . ?
 O6 C18 C19 112.1(5) . . ?
 C20 C19 C18 134.2(11) . . ?
 C20A C19 C18 137.7(18) . . ?
 Eu1 Na1 Eu1 101.58(3) 2_656 3_666 ?
 O3 Na1 Eu1 157.44(7) . 3_666 ?
 O3 Na1 Eu1 90.04(6) . 2_656 ?
 O3 Na1 O7 166.73(10) . 3_666 ?
 O3 Na1 O11 120.59(9) . 3_666 ?
 O3 Na1 O13 91.07(8) . 2_656 ?
 O4 Na1 Eu1 93.14(6) 2_656 3_666 ?
 O4 Na1 Eu1 36.23(6) 2_656 2_656 ?
 O4 Na1 O3 84.83(9) 2_656 . ?
 O4 Na1 O7 103.10(9) 2_656 3_666 ?
 O4 Na1 O11 85.44(8) 2_656 3_666 ?
 O4 Na1 O13 75.39(8) 2_656 2_656 ?
 O4 Na1 O14 166.66(10) 2_656 . ?
 O7 Na1 Eu1 90.32(6) 3_666 2_656 ?
 O7 Na1 Eu1 34.40(5) 3_666 3_666 ?
 O7 Na1 O11 71.18(8) 3_666 3_666 ?
 O7 Na1 O13 80.87(8) 3_666 2_656 ?
 O11 Na1 Eu1 113.41(6) 3_666 2_656 ?
 O11 Na1 Eu1 36.93(5) 3_666 3_666 ?
 O13 Na1 Eu1 39.33(5) 2_656 2_656 ?
 O13 Na1 Eu1 110.21(7) 2_656 3_666 ?
 O13 Na1 O11 141.42(9) 2_656 3_666 ?
 O14 Na1 Eu1 137.69(8) . 2_656 ?
 O14 Na1 Eu1 100.17(7) . 3_666 ?
 O14 Na1 O3 83.23(9) . . ?
 O14 Na1 O7 87.61(9) . 3_666 ?
 O14 Na1 O11 105.79(9) . 3_666 ?
 O14 Na1 O13 98.87(9) . 2_656 ?

loop_
  _geom_torsion_atom_site_label_1
  _geom_torsion_atom_site_label_2
  _geom_torsion_atom_site_label_3
  _geom_torsion_atom_site_label_4
  _geom_torsion
  _geom_torsion_site_symmetry_1
  _geom_torsion_site_symmetry_2
  _geom_torsion_site_symmetry_3
  _geom_torsion_site_symmetry_4
  _geom_torsion_publ_flag
 Eu1 O2 C6 O3 169.8(2) . . . . ?
 Eu1 O2 C6 C1 -8.1(4) . . . . ?
 Eu1 O4 C7 O5 -175.5(2) . . . . ?
 Eu1 O4 C7 C5 6.7(4) . . . . ?
 Eu1 O7 C16 O8 -170.7(3) . . . . ?
 Eu1 O7 C16 C11 7.8(4) . . . . ?
 Eu1 O9 C17 O10 178.4(2) . . . . ?
 Eu1 O9 C17 C15 -0.7(4) . . . . ?
 Eu1 N1 C1 C2 179.8(2) . . . . ?
 Eu1 N1 C1 C6 -1.6(3) . . . . ?
 Eu1 N1 C5 C4 179.6(2) . . . . ?
 Eu1 N1 C5 C7 -2.4(4) . . . . ?
 Eu1 N2 C11 C12 171.9(3) . . . . ?
 Eu1 N2 C11 C16 -6.7(4) . . . . ?
 Eu1 N2 C15 C14 -172.5(3) . . . . ?
 Eu1 N2 C15 C17 6.2(4) . . . . ?
 O1 C3 C4 C5 177.4(3) . . . . ?
 O1 C8 C9 C10 -2.3(11) . . . . ?
 O1 C8 C9 C10A -108.9(17) . . . . ?
 O6 C13 C14 C15 -179.5(4) . . . . ?
 O6 C18 C19 C20 141.1(12) . . . . ?
 O6 C18 C19 C20A -139(2) . . . . ?
 N1 C1 C2 C3 -0.1(5) . . . . ?
 N1 C1 C6 O2 5.9(4) . . . . ?
 N1 C1 C6 O3 -172.1(3) . . . . ?
 N1 C5 C7 O4 -2.4(4) . . . . ?
 N1 C5 C7 O5 179.6(3) . . . . ?
 N2 C11 C12 C13 0.2(6) . . . . ?
 N2 C11 C16 O7 -0.3(4) . . . . ?
 N2 C11 C16 O8 178.3(3) . . . . ?
 N2 C15 C17 O9 -3.6(4) . . . . ?
 N2 C15 C17 O10 177.3(3) . . . . ?
 C1 N1 C5 C4 0.1(5) . . . . ?
 C1 N1 C5 C7 178.0(3) . . . . ?
 C1 C2 C3 O1 -178.0(3) . . . . ?
 C1 C2 C3 C4 1.4(5) . . . . ?
 C2 C1 C6 O2 -175.5(3) . . . . ?
 C2 C1 C6 O3 6.5(5) . . . . ?
 C2 C3 C4 C5 -1.9(5) . . . . ?
 C3 O1 C8 C9 86.3(5) . . . . ?
 C3 C4 C5 N1 1.2(5) . . . . ?
 C3 C4 C5 C7 -176.6(3) . . . . ?
 C4 C5 C7 O4 175.6(3) . . . . ?
 C4 C5 C7 O5 -2.4(5) . . . . ?
 C5 N1 C1 C2 -0.7(5) . . . . ?
 C5 N1 C1 C6 177.9(3) . . . . ?
 C6 C1 C2 C3 -178.5(3) . . . . ?
 C8 O1 C3 C2 173.4(4) . . . . ?
 C8 O1 C3 C4 -5.9(6) . . . . ?
 C11 N2 C15 C14 -2.6(5) . . . . ?
 C11 N2 C15 C17 176.1(3) . . . . ?
 C11 C12 C13 O6 178.8(4) . . . . ?
 C11 C12 C13 C14 -1.8(6) . . . . ?
 C12 C11 C16 O7 -178.9(4) . . . . ?
 C12 C11 C16 O8 -0.3(5) . . . . ?
 C12 C13 C14 C15 1.2(6) . . . . ?
 C13 O6 C18 C19 -81.2(6) . . . . ?
 C13 C14 C15 N2 1.1(6) . . . . ?
 C13 C14 C15 C17 -177.5(3) . . . . ?
 C14 C15 C17 O9 175.1(3) . . . . ?
 C14 C15 C17 O10 -4.0(5) . . . . ?
 C15 N2 C11 C12 1.9(5) . . . . ?
 C15 N2 C11 C16 -176.7(3) . . . . ?
 C16 C11 C12 C13 178.7(4) . . . . ?
 C18 O6 C13 C12 -176.2(5) . . . . ?
 C18 O6 C13 C14 4.4(8) . . . . ?
 Na1 O3 C6 O2 -82.0(4) . . . . ?
 Na1 O3 C6 C1 95.9(3) . . . . ?
 Na1 O4 C7 O5 29.5(4) 2_646 . . . ?
 Na1 O4 C7 C5 -148.3(2) 2_646 . . . ?
 Na1 O7 C16 O8 26.8(5) 3_666 . . . ?
 Na1 O7 C16 C11 -154.6(2) 3_666 . . . ?

_shelx_res_file
;
    190712_s3_xzh_133k.res created by SHELXL-2014/7

TITL 190712_s3_xzh_133k in P21/c #14
REM reset to P21/c #14
CELL 0.71073 13.96762 17.57523 11.23822 90 102.643 90
ZERR 4 0.00112 0.00137 0.00087 0 0.0076 0
LATT 1
SYMM -X,0.5+Y,0.5-Z
SFAC C H Eu N Na O
UNIT 80 104 4 8 4 64
EADP C10 C10A
EADP C20 C20A

L.S. 4
PLAN  20
SIZE 0.15 0.3 0.35
TEMP 20
FREE H14a Na1
htab
conf
fmap 2
acta
SHEL 999 0.8
OMIT 1 2 1
OMIT -2 1 1
REM <olex2.extras>
REM <HklSrc "%.\\190712_s3_xzh_133k.hkl">
REM </olex2.extras>

WGHT    0.028500    0.933500
FVAR       2.64993   0.72868
EU1   3    0.414403    0.320864    0.715838    11.00000    0.01830    0.01424 =
         0.01172    0.00021    0.00225   -0.00121
O1    6    0.764587    0.488931    1.126272    11.00000    0.04341    0.02730 =
         0.04325   -0.00582   -0.01869   -0.00717
O2    6    0.411820    0.459477    0.724415    11.00000    0.02327    0.01672 =
         0.02068    0.00173   -0.00271   -0.00063
O3    6    0.482113    0.571621    0.782264    11.00000    0.03832    0.01215 =
         0.02872    0.00182    0.00567   -0.00167
O4    6    0.525184    0.235820    0.852217    11.00000    0.02531    0.01487 =
         0.01900   -0.00007    0.00093   -0.00161
O5    6    0.661314    0.212052    0.994348    11.00000    0.02594    0.02046 =
         0.03058    0.00578   -0.00357    0.00216
O6    6   -0.068038    0.362814    0.611233    11.00000    0.02151    0.14522 =
         0.03077   -0.00772    0.00271    0.01536
O7    6    0.327324    0.336555    0.504478    11.00000    0.02167    0.02885 =
         0.01538    0.00071    0.00336    0.00034
O8    6    0.189177    0.340432    0.359659    11.00000    0.02792    0.05636 =
         0.01294   -0.00001    0.00231    0.00550
O9    6    0.347192    0.331180    0.896583    11.00000    0.02044    0.02502 =
         0.01382   -0.00080    0.00179    0.00029
O10   6    0.223630    0.344948    0.992171    11.00000    0.03178    0.03625 =
         0.01329   -0.00046    0.00732    0.00269
O11   6    0.534164    0.372171    0.598710    11.00000    0.02660    0.02028 =
         0.02908   -0.00561    0.01044   -0.00419
AFIX   7
H11A  2    0.582746    0.340002    0.601483    11.00000   -1.50000
H11B  2    0.563752    0.413062    0.633998    11.00000   -1.50000
AFIX   0
O12   6    0.472318    0.217809    0.600027    11.00000    0.02424    0.01856 =
         0.01977    0.00275    0.00848   -0.00085
AFIX   7
H12A  2    0.475648    0.176087    0.640322    11.00000   -1.50000
H12B  2    0.531761    0.226355    0.594978    11.00000   -1.50000
AFIX   0
O13   6    0.323216    0.197002    0.723960    11.00000    0.02747    0.02329 =
         0.01748   -0.00298    0.00787   -0.00488
AFIX   7
H13A  2    0.296117    0.185022    0.648129    11.00000   -1.50000
H13B  2    0.273586    0.199551    0.760039    11.00000   -1.50000
AFIX   0
N1    4    0.549172    0.382845    0.871253    11.00000    0.02134    0.01466 =
         0.01417    0.00003    0.00211   -0.00068
N2    4    0.233504    0.346836    0.681280    11.00000    0.02208    0.02097 =
         0.01359   -0.00127    0.00257    0.00043
C1    1    0.555450    0.458911    0.881535    11.00000    0.02118    0.01526 =
         0.01443   -0.00115    0.00524   -0.00070
C2    1    0.627723    0.494728    0.965495    11.00000    0.02853    0.01850 =
         0.02584   -0.00507    0.00434   -0.00406
AFIX  43
H2    2    0.630056    0.547548    0.970224    11.00000   -1.20000
AFIX   0
C3    1    0.697273    0.450793    1.043229    11.00000    0.02726    0.02753 =
         0.02038   -0.00272    0.00079   -0.00802
C4    1    0.692920    0.371756    1.031988    11.00000    0.02103    0.02167 =
         0.02309   -0.00012   -0.00117   -0.00007
AFIX  43
H4    2    0.739508    0.340873    1.081039    11.00000   -1.20000
AFIX   0
C5    1    0.617311    0.340955    0.945805    11.00000    0.02101    0.01714 =
         0.01724    0.00039    0.00448   -0.00217
C6    1    0.476886    0.501569    0.789897    11.00000    0.02524    0.01897 =
         0.01778    0.00043    0.00826    0.00249
C7    1    0.602055    0.255554    0.930252    11.00000    0.02148    0.01865 =
         0.01687    0.00105    0.00607   -0.00112
C8    1    0.832536    0.447101    1.218471    11.00000    0.06250    0.04564 =
         0.04504    0.00065   -0.02879   -0.01001
AFIX  23
H8A   2    0.852296    0.478892    1.290208    11.00000   -1.20000
H8B   2    0.799562    0.402715    1.241631    11.00000   -1.20000
AFIX   0
C9    1    0.918369    0.423034    1.178337    11.00000    0.04931    0.08571 =
         0.11741    0.01947   -0.02412   -0.00829
PART 1
AFIX  43
H9A   2    0.965350    0.397524    1.235954    21.00000   -1.20000
AFIX  43
PART 0
PART 2
H9B   2    0.956384    0.465814    1.172970   -21.00000   -1.20000
AFIX   0
PART 0
C11   1    0.177343    0.347991    0.567592    11.00000    0.02431    0.02834 =
         0.01189   -0.00117   -0.00058    0.00189
C12   1    0.076823    0.352739    0.543826    11.00000    0.02471    0.05944 =
         0.01532    0.00064   -0.00079    0.00910
AFIX  43
H12   2    0.040339    0.353229    0.463973    11.00000   -1.20000
AFIX   0
C13   1    0.030274    0.356830    0.642034    11.00000    0.01965    0.06338 =
         0.02525   -0.00529    0.00325    0.00541
C14   1    0.087873    0.353754    0.759674    11.00000    0.02584    0.04078 =
         0.01620   -0.00161    0.00572    0.00292
AFIX  43
H14   2    0.059251    0.355388    0.826966    11.00000   -1.20000
AFIX   0
C15   1    0.188130    0.348241    0.774603    11.00000    0.02156    0.01814 =
         0.01507   -0.00096    0.00318    0.00025
C16   1    0.235593    0.341618    0.467630    11.00000    0.02519    0.02378 =
         0.01558    0.00270    0.00317    0.00096
C17   1    0.256977    0.341419    0.898869    11.00000    0.02707    0.01434 =
         0.01525   -0.00109    0.00485   -0.00150
C18   1   -0.121761    0.372029    0.705157    11.00000    0.02159    0.15129 =
         0.04369   -0.00470    0.00803    0.02428
AFIX  23
H18A  2   -0.184869    0.394989    0.670571    11.00000   -1.20000
H18B  2   -0.086153    0.406292    0.766938    11.00000   -1.20000
AFIX   0
C19   1   -0.137650    0.298036    0.763446    11.00000    0.08777    0.20405 =
         0.09141   -0.02086    0.04358   -0.06457
PART 1
AFIX  43
H19   2   -0.151249    0.258172    0.707887    21.00000   -1.20000
AFIX  43
PART 0
PART 2
H19A  2   -0.081566    0.267942    0.776057   -21.00000   -1.20000
AFIX   0
PART 0
PART 1
C10   1    0.937545    0.431487    1.080160    21.00000    0.05109    0.12930 =
         0.07037    0.02316   -0.00270    0.00148
AFIX  93
H10A  2    0.893602    0.456553    1.018493    21.00000   -1.20000
H10B  2    0.996348    0.412970    1.065755    21.00000   -1.20000
AFIX   0
C20   1   -0.136789    0.279653    0.860916    21.00000    0.07987    0.15237 =
         0.10413   -0.00964    0.02798   -0.00506
AFIX  93
H20A  2   -0.123909    0.315127    0.923804    21.00000   -1.20000
H20B  2   -0.148967    0.229177    0.877572    21.00000   -1.20000
AFIX   0
PART 0
PART 2
C10A  1    0.966244    0.360073    1.144449   -21.00000    0.05109    0.12930 =
         0.07037    0.02316   -0.00270    0.00148
AFIX  93
H10C  2    0.938575    0.311940    1.144409   -21.00000   -1.20000
H10D  2    1.025976    0.366037    1.121793   -21.00000   -1.20000
AFIX   0
C20A  1   -0.206243    0.264891    0.800464   -21.00000    0.07987    0.15237 =
         0.10413   -0.00964    0.02798   -0.00506
AFIX  93
H20C  2   -0.266629    0.288821    0.793237   -21.00000   -1.20000
H20D  2   -0.196213    0.216627    0.834866   -21.00000   -1.20000
AFIX   0
PART 0
NA1   5    0.559828    0.622810    0.623351    11.00000    0.03320    0.02006 =
         0.02327    0.00064    0.00758    0.00161
AFIX   6
O14   6    0.643193    0.503930    0.646571    11.00000    0.03508    0.02572 =
         0.03398   -0.00399    0.00749   -0.00372
H14A  2    0.687721    0.518107    0.706915    11.00000   -1.50000
H14B  2    0.669534    0.489025    0.589230    11.00000   -1.50000
AFIX   6

O15   6    0.707263    0.449669    0.452665    11.00000    0.05314    0.04463 =
         0.03060    0.00452   -0.00108    0.00629
H15A  2    0.698949    0.401779    0.446834    11.00000   -1.50000
H15B  2    0.668328    0.471511    0.393943    11.00000   -1.50000
AFIX   6

O16   6    0.811293    0.540763    0.828438    11.00000    0.05058    0.04989 =
         0.04759   -0.00179    0.01429    0.00569
H16A  2    0.801569    0.566475    0.888714    11.00000   -1.50000
H16B  2    0.841231    0.568052    0.785785    11.00000   -1.50000
AFIX   0
HKLF 4

REM  190712_s3_xzh_133k in P21/c #14
REM R1 =  0.0280 for    4724 Fo > 4sig(Fo)  and  0.0362 for all    5487 data
REM    380 parameters refined using      0 restraints

END

WGHT      0.0285      0.9335

REM Instructions for potential hydrogen bonds
EQIV $1 x, -y+1/2, z-1/2
HTAB O11 O5_$1
HTAB O11 O14
EQIV $2 -x+1, y-1/2, -z+3/2
HTAB O12 O3_$2
HTAB O12 O5_$1
HTAB O13 O10_$1
EQIV $3 x, -y+1/2, z+1/2
HTAB O13 O8_$3
EQIV $4 -x+1, -y+1, -z+2
HTAB C2 O9_$4
HTAB O14 O15
HTAB O15 O5_$1
EQIV $5 -x+1, -y+1, -z+1
HTAB O15 O2_$5
HTAB O16 O10_$4
HTAB O16 O8_$5

REM Highest difference peak  0.812,  deepest hole -0.743,  1-sigma level  0.102
Q1    1   0.4178  0.2604  0.7208  11.00000  0.05    0.81
Q2    1   0.4165  0.3849  0.7232  11.00000  0.05    0.80
Q3    1   0.4338  0.2003  0.5257  11.00000  0.05    0.67
Q4    1   0.4237  0.2224  0.6145  11.00000  0.05    0.47
Q5    1   0.4836  0.3521  0.6982  11.00000  0.05    0.46
Q6    1   0.3395  0.3804  0.7614  11.00000  0.05    0.42
Q7    1   0.4979  0.2208  0.5978  11.00000  0.05    0.42
Q8    1   0.5821  0.5339  0.7839  11.00000  0.05    0.42
Q9    1   0.4959  0.1883  0.6249  11.00000  0.05    0.41
Q10   1   0.3446  0.2401  0.7548  11.00000  0.05    0.41
Q11   1   0.4830  0.2909  0.6979  11.00000  0.05    0.39
Q12   1   0.2039  0.3424  0.7180  11.00000  0.05    0.39
Q13   1   0.5353  0.4757  0.8292  11.00000  0.05    0.38
Q14   1   0.6059  0.3005  0.9507  11.00000  0.05    0.37
Q15   1   0.3521  0.3411  0.7247  11.00000  0.05    0.35
Q16   1   0.1400  0.3377  0.7781  11.00000  0.05    0.35
Q17   1   0.4172  0.3264  0.6085  11.00000  0.05    0.35
Q18   1   0.3458  0.2875  0.7265  11.00000  0.05    0.35
Q19   1   0.9172  0.4884  1.2807  11.00000  0.05    0.34
Q20   1  -0.1574  0.2903  0.7477  11.00000  0.05    0.34
;
_shelx_res_checksum                78588
_shelx_hkl_file
;
   2   0   0 42048.7 1316.07   1
   3   0   0 29677.0 1244.19   1
  -3   0   0 31226.4 1251.35   1
  -4   0   0 69907.2 2334.22   1
   4   0   0 70356.0 2343.31   1
  -5   0   0 146764. 4095.83   1
   5   0   0 145163. 4130.23   1
  -6   0   0 144873. 4334.96   1
   6   0   0 146944. 4376.18   1
  -7   0   0 17329.1 1349.12   1
   7   0   0 18790.7 1411.25   1
  -8   0   0 148858. 4836.19   1
  -9   0   0 4007.91 758.838   1
 -10   0   0 23905.2 1888.39   1
 -11   0   0 80892.5 3821.73   1
  12   0   0 95507.9 4368.42   4
  13   0   0 23529.2 2142.28   4
  14   0   0 1219.65 545.997   4
  15   0   0 5669.18 1131.20   4
  16   0   0 15308.2 1971.98   4
  17   0   0 46003.2 3471.12   4
  -2   1   0 208356. 4418.45   1
   2   1   0 214659. 4461.58   1
   2  -1   0 205094. 4410.27   1
   2  -1   0 215029. 4441.40   4
   3  -1   0 37455.6 1403.92   1
  -3  -1   0 36315.3 1380.14   1
  -3   1   0 38354.4 1407.60   1
   3   1   0 39129.3 1427.80   1
   4  -1   0 225887. 5360.36   1
  -4   1   0 227555. 5374.56   1
  -4  -1   0 227245. 5348.55   1
   4   1   0 230234. 5434.83   1
   5   1   0 74939.4 2636.56   1
  -5  -1   0 71869.6 2571.66   1
  -5   1   0 72989.8 2604.95   1
   5  -1   0 68432.4 2530.20   1
   6  -1   0 61121.4 2523.15   1
  -6   1   0 66141.7 2592.37   1
   6   1   0 63323.0 2574.15   1
  -6  -1   0 58433.3 2459.84   1
   7   1   0 35381.0 1994.93   1
  -7   1   0 33076.2 1879.15   1
  -7  -1   0 31735.0 1846.95   1
   7  -1   0 31113.0 1854.30   1
  -8  -1   0 65221.7 2928.65   1
  -8   1   0 67791.0 2990.06   1
   9  -1   0 186801. 5783.12   4
  -9   1   0 186548. 5808.87   1
  -9  -1   0 179115. 5763.31   1
 -10   1   0 119200. 4602.40   1
  10  -1   0 123226. 4637.40   4
 -11   1   0 39108.0 2553.39   1
  11  -1   0 37108.7 2498.01   4
  12  -1   0 1922.10 692.777   4
 -12   1   0 1422.24 589.684   1
  13  -1   0 49854.4 3151.02   4
 -13   1   0 47546.4 3075.93   1
  14   1   0 44619.5 3045.83   4
  14  -1   0 38718.9 2887.48   4
  15   1   0 42772.4 3119.93   4
  15  -1   0 43664.3 3172.12   4
  16   1   0 21869.3 2266.87   4
  16  -1   0 22692.3 2366.56   4
  17  -1   0 6045.07 1339.17   4
  17   1   0 3978.16 1075.36   4
  -2   2   0 31056.4 1026.93   1
  -2   2   0 29964.1 1055.87   4
   2  -2   0 30605.0 1064.68   4
   2  -2   0 30694.3 1020.70   1
  -3   2   0 910.457 304.004   4
  -3   2   0 153.398 192.094   1
   3   2   0 85.7967 177.845   1
   3  -2   0 215.154 164.509   1
   3  -2   0 979.974 289.758   4
   4   2   0 43317.6 1733.20   1
  -4   2   0 43019.8 1696.50   1
   4  -2   0 43017.2 1671.77   1
   4  -2   0 44056.0 1714.42   4
   5  -2   0 46646.6 1978.52   4
   5   2   0 48445.1 2039.46   1
   5   2   0 49786.0 1245.16   3
   5  -2   0 43522.0 1919.67   1
  -5   2   0 48947.9 1995.24   1
  -6   2   0 40214.3 1946.01   1
   6   2   0 42166.6 2031.39   1
   6  -2   0 38608.0 1911.54   1
   6  -2   0 37124.4 1889.62   4
   7  -2   0 27088.8 1707.54   4
  -7   2   0 29759.9 1808.41   1
   7  -2   0 28056.9 1713.41   1
   8  -2   0 9265.85 1046.94   4
  -8   2   0 7869.11 983.092   1
  -9   2   0 1543.32 538.542   1
   9  -2   0 1847.19 638.372   4
 -10   2   0 13015.9 1391.91   1
  10  -2   0 12237.2 1322.36   4
 -11   2   0 61858.7 3265.33   1
  11  -2   0 62587.5 3272.21   4
 -12   2   0 50729.8 3059.62   1
  12  -2   0 47218.3 2940.24   4
  13  -2   0 17423.5 1829.39   4
 -13   2   0 16584.3 1798.48   1
  14  -2   0-839.952 514.378   4
 -14   2   0 349.153 562.197   1
  15   2   0 10055.0 1524.22   4
  15  -2   0 10063.8 1558.66   4
  16   2   0 14723.6 1872.73   4
  16  -2   0 14359.6 1879.84   4
  17   2   0 10004.1 1624.84   4
  17  -2   0 10106.8 1633.91   4
   0   3   0 716.625 136.839   2
   0  -3   0 881.543 145.753   2
  -1  -3   0 7607.11 412.433   2
   1  -3   0 8551.44 444.032   2
  -1   3   0 7859.54 430.001   2
   1   3   0 8116.95 432.158   2
  -2   3   0 23509.8 961.026   4
   2  -3   0 23891.4 953.309   4
   2  -3   0 24164.2 897.785   1
  -2  -3   0 23993.3 927.037   2
  -2   3   0 24488.5 910.588   1
  -3   3   0 18565.6 913.589   1
  -3   3   0 20527.3 981.410   4
   3  -3   0 19607.2 916.942   1
   3  -3   0 18951.7 950.842   4
   4  -3   0 13879.3 906.936   4
   4  -3   0 12876.4 837.694   1
  -4   3   0 14049.8 896.685   1
  -4   3   0 13769.5 913.466   4
   5   3   0 32112.8 1596.16   1
   5  -3   0 30075.1 1506.08   1
   5  -3   0 32604.0 1583.61   4
  -5   3   0 31976.0 1568.82   1
   6  -3   0 40655.2 1953.79   1
  -6   3   0 45887.0 2085.61   1
   6   3   0 41442.9 2044.82   1
   6  -3   0 41498.3 2007.95   4
   6   3   0 43583.9 1263.12   3
   7  -3   0 4911.48 698.667   1
  -7   3   0 4468.66 703.226   1
   7  -3   0 3653.71 593.307   4
   8  -3   0 1121.62 382.525   4
  -8   3   0 2256.57 532.452   1
   9  -3   0 5186.42 832.795   4
  -9   3   0 4628.22 763.672   1
  10  -3   0-147.311 493.331   4
 -10   3   0-137.870 396.961   1
 -11   3   0 223.686 398.188   1
  11  -3   0 986.536 600.331   4
  12  -3   0 4834.54 993.932   4
 -12   3   0 3213.90 763.576   1
  13  -3   0-187.703 455.152   4
 -13   3   0 608.694 408.517   1
  14  -3   0-331.568 452.379   4
 -14   3   0 22.7821 529.610   1
 -15   3   0 960.159 610.096   1
  15  -3   0 2021.32 815.371   4
  16   3   0 3493.51 1001.86   4
  16  -3   0 1971.20 741.697   4
  17  -3   0 1236.87 725.134   4
  17   3   0 1017.82 688.266   4
   0  -4   0 184120. 3900.15   2
   0   4   0 187689. 3911.31   2
  -1  -4   0 44280.2 1336.71   2
   1  -4   0 45906.8 1366.38   2
   1   4   0 45942.9 1357.74   2
  -1   4   0 46676.0 1348.44   2
  -2  -4   0 8146.31 531.526   2
  -2   4   0 8834.53 554.934   2
   2   4   0 8801.97 564.249   2
  -2   4   0 8319.02 577.796   4
  -2   4   0 8201.34 531.580   1
  -3   4   0 5714.47 492.356   1
   3  -4   0 5719.05 490.598   1
  -3   4   0 6908.13 577.574   4
   3  -4   0 5415.58 504.340   4
  -3  -4   0 5008.10 470.172   2
  -4   4   0 4592.00 503.813   1
   4  -4   0 3266.69 417.250   1
  -4   4   0 3895.76 516.602   4
   4  -4   0 4120.42 506.732   4
  -5   4   0 11724.5 924.356   4
   5  -4   0 8935.79 774.679   1
   5  -4   0 8473.17 813.663   4
   5   4   0 9753.80 872.023   1
  -5   4   0 9822.44 820.067   1
  -6   4   0 67809.0 2610.46   1
   6  -4   0 68824.9 2663.05   4
   6  -4   0 64456.8 2557.40   1
  -7   4   0 6043.36 786.224   1
   7  -4   0 5998.55 797.375   4
   7   4   0 6474.09 461.534   3
   8   4   0 50303.0 1514.77   3
   8  -4   0 52619.3 2568.42   4
  -8   4   0 51252.5 2562.66   1
  -9   4   0 4461.35 819.506   1
   9  -4   0 4338.79 792.492   4
 -10   4   0 618.336 457.431   1
  10  -4   0-163.813 305.185   4
  11  -4   0 1031.60 609.790   4
 -11   4   0 81.2673 411.616   1
  12  -4   0 3334.93 828.896   4
 -12   4   0 3681.95 834.295   1
  13  -4   0-369.530 541.192   4
 -13   4   0-893.720 693.575   1
 -14   4   0-479.871 563.984   1
  14  -4   0-576.661 669.985   4
 -15   4   0 486.677 607.173   1
  15  -4   0-297.146 384.975   4
  16  -4   0 914.859 660.534   4
 -16   4   0-662.956 739.092   1
  17  -4   0-453.256 602.723   4
  17   4   0-494.705 526.201   4
   0   5   0 65.2038 97.5713   2
   0  -5   0 379.364 161.259   2
  -1  -5   0 579842. 11019.8   2
  -1   5   0 577446. 11030.0   2
   1   5   0 590380. 11037.0   2
  -2   5   0 49565.7 1572.32   1
  -2   5   0 47997.7 1567.67   2
  -2   5   0 48034.3 1687.32   4
   2   5   0 51349.3 1628.07   2
  -2  -5   0 49133.2 1572.09   2
  -3   5   0 30253.8 1334.25   4
  -3  -5   0 28780.0 1234.89   2
   3  -5   0 28197.2 1197.86   1
  -3   5   0 30715.9 1253.52   1
   3  -5   0 27534.6 1280.25   4
  -4   5   0 50391.7 1972.45   4
  -4   5   0 50365.8 1862.85   1
   4  -5   0 51052.2 1974.15   4
   4  -5   0 51759.6 1867.35   1
  -4  -5   0 52287.4 1904.90   2
   5  -5   0 52544.8 2175.69   4
  -5  -5   0 52810.5 2114.74   2
  -5   5   0 55951.3 2135.42   1
   5  -5   0 56410.6 2118.12   1
  -5   5   0 56924.7 2242.84   4
   6  -5   0 5345.33 695.699   4
   6  -5   0 4564.21 590.906   1
  -6   5   0 5116.76 706.690   1
   7  -5   0 3231.67 616.082   4
  -7   5   0 2060.08 470.161   1
  -8   5   0 10839.4 1093.71   1
   8  -5   0 8625.52 1015.18   4
   8   5   0 10049.1 652.086   3
  -9   5   0 56585.9 2811.26   1
   9   5   0 52028.8 1652.33   3
   9  -5   0 49969.6 2715.89   4
  10  -5   0 37251.0 2396.85   4
 -10   5   0 36911.7 2396.69   1
  11  -5   0 13405.9 1479.14   4
 -11   5   0 14000.2 1549.52   1
  12  -5   0 732.755 441.225   4
 -12   5   0 613.032 474.441   1
  13  -5   0 23192.5 2155.38   4
 -13   5   0 22996.6 2167.89   1
  14  -5   0 12459.3 1636.81   4
 -14   5   0 12533.9 1634.07   1
  15  -5   0 20479.7 2205.96   4
 -15   5   0 20619.2 2210.95   1
  16  -5   0 10565.5 1660.26   4
 -16   5   0 9251.67 1536.70   1
 -17   5   0 1068.02 586.760   1
   0   6   0 999999. 18732.6   2
   0  -6   0 992330. 18741.1   2
  -1  -6   0 118736. 2922.07   2
   1   6   0 117535. 2918.99   2
  -1   6   0 112934. 2885.07   2
   1  -6   0 113636. 2915.08   2
   2   6   0 36346.1 1407.59   2
  -2  -6   0 38378.3 1410.23   2
  -2   6   0 38208.0 1404.35   2
  -2   6   0 36660.7 1384.50   1
  -2   6   0 38321.3 1529.72   4
   3   6   0 38909.6 1539.20   2
  -3   6   0 36829.9 1479.79   2
  -3   6   0 38105.0 1491.35   1
  -3  -6   0 37012.9 1489.14   2
  -3   6   0 37665.4 1610.41   4
  -4   6   0 80237.8 2545.78   1
   4  -6   0 82913.6 2549.40   1
  -4   6   0 82372.8 2711.36   4
  -4  -6   0 82478.5 2595.47   2
   4  -6   0 77795.1 2686.86   4
  -5   6   0 296280. 7264.25   4
   5  -6   0 307241. 7029.74   1
   5  -6   0 307199. 7258.26   4
  -5  -6   0 305366. 7085.06   2
  -5   6   0 307098. 7074.10   1
   6  -6   0 149526. 4306.29   1
  -6  -6   0 148166. 4348.99   2
   6  -6   0 141474. 4406.37   4
  -6   6   0 151301. 4347.76   1
   7  -6   0 10784.8 1071.56   4
  -7   6   0 10600.4 1043.09   1
   8  -6   0 13079.0 1264.52   4
  -8   6   0 12758.9 1223.35   1
   8   6   0 13508.9 828.383   3
  -9   6   0 785.593 345.852   1
   9  -6   0 1722.65 562.291   4
   9   6   0 2219.07 335.962   3
  10  -6   0 13444.9 1465.99   4
 -10   6   0 12326.1 1395.10   1
 -11   6   0 62236.2 3324.07   1
  11  -6   0 54905.9 3161.83   4
  12  -6   0 74155.8 3906.74   4
 -12   6   0 85114.3 4142.40   1
 -13   6   0 36590.6 2735.24   1
  13  -6   0 28610.8 2426.63   4
 -14   6   0 2161.45 845.820   1
  14  -6   0 3032.25 850.906   4
 -15   6   0-180.859 607.789   1
  15  -6   0-437.658 603.171   4
 -16   6   0 4981.45 1090.73   1
  16  -6   0 6552.49 1319.11   4
   0  -7   0 111.826 143.885   2
   0   7   0-19.8787 145.736   2
   1   7   0 301697. 6330.49   2
  -1   7   0 285135. 6273.76   2
   1  -7   0 288179. 6302.93   2
  -1  -7   0 298104. 6311.45   2
  -2  -7   0 224711. 5189.37   2
  -2   7   0 229539. 5225.49   2
  -2   7   0 227978. 5442.28   4
   2   7   0 233213. 5257.91   2
   3   7   0 249372. 5804.01   2
  -3   7   0 244587. 5749.63   2
  -3   7   0 257719. 5785.07   1
  -3  -7   0 248559. 5724.05   2
  -3   7   0 261164. 6020.11   4
  -4   7   0 194500. 4861.39   1
  -4  -7   0 196312. 4903.57   2
  -4   7   0 194095. 4907.53   2
  -4   7   0 198026. 5109.41   4
   5  -7   0 30320.9 1517.02   1
   5  -7   0 29415.7 1623.55   4
  -5  -7   0 27434.7 1489.30   2
  -5   7   0 30048.5 1546.69   1
  -6   7   0 17593.9 1232.22   1
  -6  -7   0 16611.9 1247.12   2
   6  -7   0 15523.2 1237.34   4
  -7  -7   0 25771.3 1685.62   2
  -7   7   0 30252.7 1780.26   1
   7  -7   0 28695.7 1803.45   4
  -8  -7   0 61476.8 2816.62   2
   8  -7   0 61402.5 2899.88   4
  -8   7   0 61546.8 2868.08   1
  -9   7   0 139215. 4791.48   1
   9   7   0 130475. 3558.76   3
  -9  -7   0 127243. 4683.44   2
   9  -7   0 129424. 4767.40   4
  10  -7   0 66433.2 3367.98   4
  10   7   0 67803.8 2251.37   3
 -10   7   0 72794.7 3452.48   1
  11  -7   0 7836.33 1198.87   4
 -11   7   0 9257.20 1288.64   1
 -12   7   0 5914.08 1163.70   1
  12  -7   0 5062.11 1025.80   4
 -13   7   0 59994.2 3606.43   1
  13  -7   0 60242.9 3636.87   4
 -14   7   0 88496.7 4602.81   1
  14  -7   0 86393.4 4589.99   4
  15  -7   0 42569.8 3250.55   4
 -15   7   0 46826.3 3361.26   1
 -16   7   0 19660.2 2272.36   1
  16  -7   0 16049.5 2082.31   4
 -16  -7   0 17526.4 2183.71   2
   0  -8   0 83752.6 2506.30   2
   0   8   0 86011.7 2522.79   2
   1   8   0 79624.6 2400.84   2
  -1   8   0 76680.5 2361.85   2
  -1  -8   0 76315.5 2345.14   2
   1  -8   0 76259.0 2387.77   2
  -2   8   0 464.904 218.833   4
  -2  -8   0 342.672 189.757   2
  -2   8   0 673.640 216.048   2
   2  -8   0 162.382 227.181   2
   2   8   0 322.021 193.899   2
  -3  -8   0 16003.4 1001.44   2
  -3   8   0 17425.3 1030.11   2
   3   8   0 16205.8 1029.00   2
  -3   8   0 16550.2 1021.41   1
  -3   8   0 18560.9 1178.71   4
  -4   8   0 77143.6 2628.98   2
  -4  -8   0 77483.0 2608.96   2
  -4   8   0 77709.8 2616.92   1
  -5   8   0 84511.2 2939.42   1
  -5  -8   0 89766.0 3015.14   2
   6  -8   0 62503.2 2733.13   4
  -6   8   0 67052.0 2655.18   1
  -6  -8   0 65056.9 2643.44   2
   7  -8   0 93829.4 3623.67   4
  -7  -8   0 99664.3 3566.42   2
  -7   8   0 97665.4 3567.62   1
  -8   8   0 24999.9 1776.43   1
   8  -8   0 26491.5 1858.87   4
  -8  -8   0 25419.0 1780.46   2
   9  -8   0 7732.89 1069.86   4
   9   8   0 8241.62 757.948   3
  -9   8   0 9306.28 1141.83   1
  -9  -8   0 7282.52 1016.40   2
  10   8   0 56173.8 2129.54   3
 -10  -8   0 58931.0 3089.22   2
 -10   8   0 55027.0 3046.36   1
  10  -8   0 54173.6 3072.61   4
 -11  -8   0 85896.6 4088.89   2
  11  -8   0 90250.7 4219.33   4
 -11   8   0 90692.6 4145.17   1
  12  -8   0 90966.0 4460.03   4
 -12  -8   0 89211.9 4325.61   2
 -12   8   0 102431. 4599.63   1
  13  -8   0 39713.8 2969.21   4
 -13   8   0 43759.7 3064.58   1
 -13  -8   0 40369.0 2929.55   2
 -14   8   0 8243.78 1393.66   1
 -14  -8   0 8036.19 1409.10   2
  14  -8   0 7795.16 1476.50   4
 -15  -8   0 1432.90 823.078   2
  15  -8   0 3203.71 1025.71   4
 -15   8   0 3498.11 1030.75   1
 -16   8   0 13640.5 1892.67   1
 -16  -8   0 14413.9 1976.18   2
   0  -9   0-102.562 199.696   2
   0   9   0-24.2158 170.298   2
   1   9   0 7770.88 672.187   2
  -1   9   0 7029.79 645.103   2
  -1  -9   0 6703.69 625.509   2
   1  -9   0 8135.55 698.545   2
   2   9   0 188835. 4678.06   2
  -2   9   0 188652. 4868.86   4
  -2   9   0 175516. 4544.00   2
  -2  -9   0 177660. 4553.94   2
   2  -9   0 184323. 4667.59   2
  -3   9   0 88479.6 2818.52   2
  -3   9   0 89662.5 2843.43   1
  -3  -9   0 88055.1 2810.90   2
   3   9   0 84161.6 2832.44   2
  -4  -9   0 26960.9 1448.15   2
  -4   9   0 25959.6 1420.02   1
  -5   9   0 8883.19 863.069   1
  -5  -9   0 9049.06 866.760   2
  -6   9   0 11788.0 1042.63   1
  -6  -9   0 12261.6 1063.60   2
  -7  -9   0 10922.1 1079.65   2
  -7   9   0 12125.5 1143.51   1
  -8   9   0 45925.9 2438.43   1
  -8  -9   0 42956.8 2365.94   2
   8  -9   0 42609.1 2474.73   4
  -9  -9   0 26731.9 1940.39   2
  -9   9   0 28931.0 2016.46   1
   9  -9   0 27102.8 2019.33   4
 -10  -9   0 18659.8 1700.67   2
  10  -9   0 21152.0 1885.02   4
 -10   9   0 22013.4 1868.39   1
 -11  -9   0 375.714 450.152   2
 -11   9   0 361.194 408.001   1
  11  -9   0 194.053 402.071   4
  12  -9   0 7424.36 1201.68   4
 -12   9   0 8555.86 1317.06   1
 -12  -9   0 7178.37 1165.91   2
 -13  -9   0 6424.26 1157.09   2
 -13   9   0 5337.57 1087.89   1
  13  -9   0 4086.84 937.739   4
  14  -9   0 14832.4 1889.20   4
 -14   9   0 14806.9 1890.48   1
 -14  -9   0 15308.2 1893.28   2
  15  -9   0 6700.08 1330.31   4
 -15   9   0 7973.33 1395.03   1
 -15  -9   0 7122.82 1347.43   2
 -16   9   0 5362.30 1249.22   1
 -16  -9   0 4964.54 1223.45   2
   0 -10   0 39701.6 1722.73   2
   0  10   0 43529.7 1786.32   2
   1 -10   0 37600.6 1676.51   2
  -1  10   0 37088.1 1636.23   2
  -1 -10   0 37166.8 1636.36   2
   1  10   0 39007.9 1682.27   2
   2  10   0 28171.3 1448.93   2
   2 -10   0 26866.1 1429.92   2
  -2  10   0 26709.0 1372.25   2
  -2 -10   0 25933.6 1377.71   2
  -3 -10   0 10082.0 853.457   2
  -3  10   0 11007.0 894.580   1
  -4 -10   0 14050.9 1067.43   2
  -4  10   0 16251.4 1160.36   1
  -5  10   0 609.597 333.196   1
  -5 -10   0 428.776 233.164   2
  -6  10   0 89.8380 265.671   1
  -6 -10   0 150.006 287.438   2
  -7 -10   0 5002.84 739.383   2
  -7  10   0 4019.32 711.167   1
  -8 -10   0 918.946 287.181   2
  -8  10   0 1742.40 518.087   1
  -9 -10   0 3726.46 740.286   2
  -9  10   0 4123.59 791.373   1
   9 -10   0 2378.52 621.064   4
  10 -10   0 241.408 409.945   4
 -10 -10   0 1573.80 583.410   2
 -10  10   0 857.294 501.756   1
 -11  10   0 3589.04 902.908   1
 -11 -10   0 3472.57 840.919   2
  11 -10   0 3150.03 800.954   4
 -12  10   0 1872.39 727.010   1
  12 -10   0 1960.85 677.533   4
 -12 -10   0 1162.19 483.886   2
 -13  10   0 4110.44 1002.86   1
  13 -10   0 4174.02 985.859   4
 -13 -10   0 3290.96 851.626   2
 -14  10   0 2800.99 926.791   1
  14 -10   0 794.374 526.887   4
 -14 -10   0 1324.18 696.330   2
 -15 -10   0 422.792 529.940   2
 -15  10   0-579.610 650.807   1
  15 -10   0-1131.44 835.577   4
 -16  10   0 121.477 564.625   1
   0 -11   0-201.997 271.437   2
   1 -11   0 48513.5 2041.97   2
  -1 -11   0 49955.6 2056.91   2
  -2 -11   0 1074.68 286.597   2
   2 -11   0 1220.25 352.202   2
  -3  11   0 9445.75 869.118   1
  -3 -11   0 7723.29 775.401   2
  -4 -11   0 1365.49 377.583   2
  -4  11   0 1510.02 357.307   1
  -5 -11   0-94.1041 309.939   2
  -5  11   0 147.514 252.982   1
  -6  11   0 12259.0 1122.63   1
  -6 -11   0 11457.1 1090.94   2
  -7 -11   0 732.580 276.432   2
  -7  11   0 998.759 424.301   1
  -8  11   0 1057.07 503.615   1
  -8 -11   0 307.245 394.154   2
  -9  11   0 949.400 398.172   1
  -9 -11   0 427.686 357.216   2
 -10 -11   0 9275.70 1217.34   2
 -10  11   0 8958.49 1235.26   1
 -11  11   0 6369.21 1130.66   1
 -11 -11   0 5223.04 1014.44   2
 -12 -11   0 557.523 407.849   2
  12 -11   0 176.849 658.131   4
 -12  11   0 1194.37 623.823   1
  13 -11   0 320.230 614.595   4
 -13 -11   0 944.891 537.544   2
 -14  11   0 1059.04 545.224   1
  14 -11   0-697.463 776.324   4
 -14 -11   0 1068.51 628.999   2
 -15  11   0-85.7517 508.086   1
 -15 -11   0-85.7918 427.595   2
   0 -12   0 46339.9 2029.93   2
  -1 -12   0 17029.7 1180.81   2
   1 -12   0 16698.0 1174.78   2
   2 -12   0 667.841 369.394   2
  -2 -12   0 423.679 288.723   2
  -3  12   0 2176.19 462.513   1
  -3 -12   0 2107.02 453.876   2
  -4  12   0 15177.8 1192.47   1
  -4 -12   0 14006.0 1132.39   2
  -5  12   0 63585.2 2706.74   1
  -5 -12   0 60886.3 2630.06   2
  -6 -12   0 34100.1 2002.83   2
  -6  12   0 36731.3 2060.82   1
  -7 -12   0 1422.62 383.792   2
  -7  12   0 2125.50 516.969   1
  -8 -12   0 10520.4 1179.29   2
  -8  12   0 11325.0 1266.28   1
  -9 -12   0 6532.57 952.722   2
  -9  12   0 6641.76 1025.00   1
 -10  12   0 10522.2 1339.18   1
 -10 -12   0 9989.21 1283.86   2
 -11 -12   0 21236.1 1984.15   2
 -11  12   0 27333.5 2251.00   1
 -12 -12   0 26264.5 2311.79   2
 -12  12   0 33771.0 2636.67   1
 -13  12   0 9310.35 1494.00   1
 -13 -12   0 7290.25 1212.29   2
 -14 -12   0 1105.95 717.642   2
 -14  12   0 1068.48 680.807   1
 -15  12   0 558.608 444.054   1
 -15 -12   0 262.832 488.114   2
   0 -13   0-139.105 314.220   2
   1 -13   0 67735.8 2637.75   2
  -1 -13   0 58642.6 2478.93   2
  -2 -13   0 101404. 3383.96   2
   2 -13   0 99199.2 3441.16   2
  -3  13   0 69748.8 2793.15   1
  -3 -13   0 67317.5 2695.32   2
  -4 -13   0 22363.6 1485.52   2
  -4  13   0 22354.7 1528.09   1
  -5  13   0 1854.94 475.471   1
  -5 -13   0 1620.18 432.994   2
  -6 -13   0 355.559 253.260   2
  -6  13   0 349.645 361.806   1
  -7  13   0 9414.72 1132.05   1
  -7 -13   0 7788.19 1037.01   2
  -8 -13   0 44889.0 2556.92   2
  -8  13   0 47895.3 2664.55   1
  -9 -13   0 55153.2 3003.90   2
  -9  13   0 57931.2 3108.92   1
 -10  13   0 40211.1 2685.51   1
 -10 -13   0 35649.1 2515.00   2
 -11 -13   0 9344.13 1327.21   2
 -11  13   0 10557.2 1426.61   1
 -12 -13   0 777.303 380.078   2
 -12  13   0 1093.09 628.260   1
 -13 -13   0 9768.70 1475.55   2
 -13  13   0 10914.4 1589.91   1
 -14  13   0 27053.0 2581.63   1
 -14 -13   0 28519.6 2631.47   2
 -15  13   0 25091.1 2618.13   1
   0 -14   0 41582.6 2056.76   2
   1 -14   0 112408. 3754.41   2
  -1 -14   0 106835. 3678.07   2
  -2 -14   0 23415.1 1551.12   2
   2 -14   0 25333.0 1644.02   2
  -3 -14   0 987.279 339.537   2
  -3  14   0 1396.84 455.455   1
  -4  14   0 50529.0 2507.05   1
  -4 -14   0 55132.7 2550.42   2
  -5 -14   0 120780. 4180.08   2
  -5  14   0 122597. 4304.60   1
  -6 -14   0 121980. 4364.74   2
  -6  14   0 124976. 4448.79   1
  -7 -14   0 124725. 4548.33   2
  -7  14   0 126010. 4610.76   1
  -8 -14   0 25729.6 1935.25   2
  -8  14   0 28961.5 2092.81   1
  -9  14   0 988.666 414.408   1
  -9 -14   0 511.302 419.832   2
 -10 -14   0 27836.6 2220.55   2
 -10  14   0 27318.0 2247.30   1
 -11  14   0 51032.3 3249.26   1
 -11 -14   0 52012.0 3204.29   2
 -12  14   0 43925.5 3122.35   1
 -12 -14   0 40397.2 2929.00   2
 -13  14   0 28218.2 2570.52   1
 -13 -14   0 30146.0 2608.68   2
 -14 -14   0 1148.55 609.419   2
 -14  14   0 2023.59 911.705   1
   0 -15   0 11.4698 360.187   2
   1 -15   0 9042.20 982.642   2
  -1 -15   0 6016.58 796.048   2
  -2 -15   0 95638.1 3556.06   2
   2 -15   0 104963. 3738.48   2
  -3  15   0 121298. 4175.90   1
  -3 -15   0 117786. 4070.44   2
  -4  15   0 47055.7 2449.13   1
  -4 -15   0 48782.6 2460.13   2
  -5 -15   0 3466.39 646.417   2
  -5  15   0 5403.56 864.996   1
  -6 -15   0 1108.98 409.390   2
  -6  15   0 2046.12 603.066   1
  -7 -15   0 36611.1 2291.71   2
  -7  15   0 36661.9 2327.07   1
  -8 -15   0 54942.1 2969.81   2
  -8  15   0 54839.2 3000.81   1
  -9  15   0 50598.3 2989.75   1
  -9 -15   0 45233.4 2821.82   2
 -10 -15   0 43022.9 2827.75   2
 -10  15   0 42248.3 2897.92   1
 -11 -15   0 10377.1 1477.24   2
 -11  15   0 15012.7 1777.48   1
 -12  15   0-436.284 636.505   1
 -12 -15   0-577.914 549.412   2
 -13 -15   0 11785.6 1666.00   2
 -13  15   0 10391.8 1621.55   1
 -14  15   0 31428.3 2854.26   1
   0 -16   0 33946.4 1984.34   2
  -1 -16   0 67017.9 2934.14   2
   1 -16   0 71900.4 3054.71   2
  -2 -16   0 46651.8 2386.42   2
  -3 -16   0 79.6427 338.966   2
  -3  16   0 237.802 345.393   1
  -4  16   0 13372.2 1344.63   1
  -4 -16   0 13538.9 1272.34   2
  -5 -16   0 9389.06 1094.48   2
  -5  16   0 9740.51 1159.31   1
  -6 -16   0 30560.0 2064.36   2
  -6  16   0 28867.5 2076.53   1
  -7 -16   0 36581.3 2373.98   2
  -7  16   0 37945.6 2464.48   1
  -8  16   0 6595.79 1061.35   1
  -8 -16   0 6883.65 1055.24   2
  -9  16   0 268.789 456.148   1
  -9 -16   0 436.854 479.579   2
 -10  16   0 5821.84 1118.03   1
 -10 -16   0 5796.03 1053.94   2
 -11 -16   0 9828.01 1411.48   2
 -11  16   0 12883.9 1688.03   1
 -12  16   0 7513.00 1381.88   1
 -12 -16   0 6601.64 1187.58   2
 -13 -16   0 3754.68 989.313   2
 -13  16   0 4014.62 1053.76   1
   0 -17   0 42.2625 276.611   2
  -1 -17   0 930.177 398.932   2
   1 -17   0 2306.44 607.389   2
  -2  17   0 7152.71 975.470   1
  -2 -17   0 8224.80 995.273   2
  -3 -17   0 11942.3 1227.11   2
  -3  17   0 11097.6 1194.11   1
  -4 -17   0 482.188 362.567   2
  -4  17   0-117.382 291.686   1
  -5  17   0-456.182 439.260   1
  -5 -17   0 36.7358 322.007   2
  -6 -17   0 369.939 337.807   2
  -6  17   0 1853.69 563.466   1
  -7 -17   0 978.124 374.870   2
  -7  17   0 1289.33 493.023   1
  -8 -17   0 9271.23 1235.79   2
  -8  17   0 9818.47 1297.38   1
  -9  17   0 8103.24 1236.50   1
  -9 -17   0 6659.67 1110.41   2
 -10 -17   0 5980.31 1086.00   2
 -10  17   0 5033.55 1006.94   1
 -11  17   0 2354.63 737.844   1
 -11 -17   0 1983.44 738.852   2
 -12  17   0 1824.18 796.554   1
 -12 -17   0 2164.81 785.810   2
 -13  17   0-670.403 680.275   1
   0 -18   0 18300.7 1557.52   2
  -1 -18   0 10648.5 1178.71   2
   1 -18   0 11379.7 1245.45   2
  -2 -18   0 258.099 394.821   2
  -2  18   0-51.1881 291.325   1
  -3  18   0 112.804 336.416   1
  -3 -18   0-240.732 379.778   2
  -4 -18   0 625.310 302.117   2
  -4  18   0 284.870 300.946   1
  -5  18   0 631.676 331.075   1
  -5 -18   0 949.728 356.040   2
  -6  18   0 253.994 307.360   1
  -6 -18   0-353.728 431.173   2
  -7 -18   0-508.107 444.528   2
  -7  18   0-616.446 496.176   1
  -8 -18   0-95.6586 457.935   2
  -8  18   0 198.363 422.857   1
  -9 -18   0 81.1176 385.783   2
  -9  18   0-318.565 492.363   1
 -10  18   0 6.87207 474.109   1
 -10 -18   0-583.233 627.272   2
 -11 -18   0 492.395 555.036   2
 -11  18   0 67.1289 461.352   1
 -12  18   0 431.620 471.466   1
 -12 -18   0-338.540 441.576   2
   0 -19   0-139.776 467.409   2
   1 -19   0 1957.82 531.073   2
  -1 -19   0 1140.86 374.862   2
  -2 -19   0 29510.9 2071.62   2
  -2  19   0 26921.7 2045.24   1
  -3  19   0 29721.8 2136.19   1
  -3 -19   0 26165.6 1947.96   2
  -4 -19   0 11661.5 1286.25   2
  -4  19   0 11894.3 1359.45   1
  -5 -19   0 1078.81 303.252   2
  -5  19   0 1492.64 520.968   1
  -6 -19   0 55.8274 308.962   2
  -6  19   0-172.627 378.346   1
  -7 -19   0 4288.96 929.840   2
  -7  19   0 5357.80 991.117   1
  -8  19   0 15135.3 1730.45   1
  -8 -19   0 16852.9 1757.48   2
  -9 -19   0 13019.1 1590.79   2
  -9  19   0 11840.7 1553.99   1
 -10  19   0 7438.92 1331.77   1
 -10 -19   0 8851.56 1406.32   2
 -11 -19   0 1703.87 681.855   2
 -11  19   0 2133.94 771.063   1
   0 -20   0 24252.6 1926.53   2
  -1 -20   0 49083.3 2808.79   2
  -2 -20   0 34733.3 2341.89   2
  -2  20   0 38224.6 2487.61   1
  -3 -20   0 836.883 401.480   2
  -3  20   0 1406.65 610.546   1
  -4 -20   0 7329.97 1106.49   2
  -4  20   0 7138.25 1098.22   1
  -5 -20   0 15246.6 1575.84   2
  -5  20   0 15697.9 1663.05   1
  -6 -20   0 31935.1 2361.68   2
  -6  20   0 32370.3 2427.30   1
  -7 -20   0 24946.2 2135.04   2
  -7  20   0 30684.5 2428.64   1
  -8  20   0 6892.56 1153.02   1
  -8 -20   0 4409.62 910.311   2
  -9 -20   0 689.050 494.830   2
  -9  20   0-1114.58 716.599   1
 -10 -20   0 3952.26 974.568   2
   0 -21   0 81.7113 474.615   2
  -1 -21   0 9326.38 1244.73   2
  -2  21   0 52657.7 3062.48   1
  -2 -21   0 49528.5 2933.01   2
  -3 -21   0 71787.5 3603.58   2
  -3  21   0 68742.6 3640.99   1
  -4 -21   0 35204.0 2474.55   2
  -4  21   0 37571.2 2632.47   1
  -5  21   0 4732.97 914.311   1
  -5 -21   0 4944.44 973.063   2
  -6  21   0 818.378 548.204   1
  -6 -21   0 1167.29 557.712   2
  -7  21   0 23335.7 2176.99   1
  -7 -21   0 19772.8 1939.26   2
  -8  21   0 40597.9 2987.22   1
  -8 -21   0 45174.1 3035.84   2
  -9 -21   0 33180.6 2678.70   2
   0 -22   0 30931.8 2326.50   2
  -1 -22   0 30496.4 2292.32   2
  -1  22   0 29007.4 2304.76   1
  -2  22   0 14438.9 1620.05   1
  -2 -22   0 13296.4 1522.26   2
  -3 -22   0 349.928 458.370   2
  -3  22   0 763.487 381.971   1
  -4 -22   0 11503.1 1427.34   2
  -4  22   0 13027.0 1577.99   1
  -5  22   0 21229.0 2043.03   1
  -5 -22   0 17632.5 1818.17   2
  -6  22   0 27799.9 2383.67   1
  -1 -23   0 549.451 463.144   2
  -1  23   0 1402.79 537.692   1
  -2  23   0 14078.2 1660.96   1
  -3  23   0 26013.5 2273.37   1
  -4  23   0 11060.9 1480.22   1
   0  24   0 1054.96 528.901   1
  17   0  -1 220.714 567.890   4
  16   0  -1 463.987 492.881   4
  15   0  -1 890.683 722.235   4
  14   0  -1 130.720 484.480   4
 -13   0   1-519.093 620.890   1
 -12   0   1-249.967 494.973   1
 -11   0   1 323.918 430.424   1
 -10   0   1 421.232 377.791   1
  -9   0   1 29.2449 62.1554   3
  -9   0   1 704.521 513.033   1
  -8   0   1 330.744 341.132   1
  -8   0   1 130.222 92.5609   3
  -7   0   1 486.741 182.700   3
   7   0  -1 13.2868 199.675   1
  -7   0   1-173.851 339.914   1
   6   0  -1-183.103 279.674   1
  -6   0   1-9.54204 336.924   1
   5   0  -1 252.385 250.071   1
  -5   0   1-252.890 316.155   1
  -4   0   1 132.256 223.604   1
   4   0  -1 339.956 215.934   1
   3   0  -1 419.802 219.217   1
  -3   0   1 265.391 233.523   1
  -2   0   1 962.034 184.212   1
   2   0  -1 256.438 128.332   1
   2   0   1 325.855 142.245   1
   2   0   1 701.762 182.199   4
   3   0   1 181.262 163.125   1
   4   0   1 128.516 212.400   1
  -4   0  -1-156.853 267.683   1
   5   0   1 109.067 228.166   1
  -5   0  -1 482.462 282.145   1
  -6   0  -1 145.127 242.489   1
   6   0   1 204.965 199.916   1
  -7   0  -1-55.5054 305.842   1
   7   0   1-42.1873 294.176   1
   8   0   1 551.504 373.563   4
  -8   0  -1-167.104 338.021   1
   9   0   1 370.057 489.975   4
  10   0   1-16.9507 447.574   4
  11   0   1-169.983 372.749   4
  12   0   1 485.462 481.058   4
  13   0   1 194.275 473.106   4
  14   0   1-380.809 366.831   4
  15   0   1-658.239 474.792   4
  16   0   1-187.103 408.717   4
  17   0   1-291.432 365.878   4
  17   1  -1 5753.57 1314.88   4
  17  -1  -1 3608.82 1097.02   4
  16   1  -1 17549.6 2078.05   4
  16  -1  -1 18795.9 2151.05   4
  15  -1  -1 36959.5 2925.92   4
 -15   1   1 35256.3 2894.06   1
  15   1  -1 35109.4 2864.31   4
  14  -1  -1 11002.8 1551.20   4
 -14   1   1 9615.81 1456.57   1
  13  -1  -1 13377.0 1660.35   4
 -13   1   1 15114.2 1726.51   1
 -12   1   1 1286.33 601.805   1
 -12  -1   1 1383.36 541.737   1
  12  -1  -1 2547.87 822.439   4
 -11   1   1 2492.60 708.891   1
 -11  -1   1 2443.10 613.878   1
 -10   1   1 10578.2 514.347   3
 -10  -1   1 10833.4 1273.68   1
  -9   1   1 25176.1 1866.15   1
  -9  -1   1 25557.7 1879.08   1
  -8   1   1 13185.5 1273.83   1
  -8  -1   1 11212.9 1147.84   1
   7  -1  -1 13406.4 1158.21   1
  -7  -1   1 14753.5 1247.27   1
   7   1  -1 13395.0 1179.15   1
  -7   1   1 14780.3 1253.07   1
   6   1  -1 2552.57 487.265   1
  -6   1   1 2194.43 535.814   1
   6  -1  -1 3118.04 525.744   1
  -6  -1   1 2830.14 586.245   1
  -6  -1   1 2625.38 262.312   3
  -5   1   1 45700.7 1955.36   1
   5  -1  -1 43621.8 1897.00   1
   5   1  -1 45046.7 1939.29   1
  -5  -1   1 47901.2 1374.28   3
  -5  -1   1 46140.2 1986.53   1
  -4  -1   1 28658.7 1392.38   1
   4   1  -1 30050.7 1406.14   1
  -4  -1   1 29759.9 1020.09   3
   4  -1  -1 30888.5 1362.72   1
  -4   1   1 32004.8 1403.59   1
  -3  -1   1 44243.1 1302.53   3
  -3   1   1 45532.4 1539.02   1
   3   1  -1 40836.4 1518.50   1
  -3  -1   1 42713.0 1545.55   1
   3  -1  -1 42761.6 1478.54   1
   2   1  -1 3080.70 317.870   1
  -2  -1   1 3050.78 314.065   1
   2  -1  -1 3683.87 310.562   1
  -2   1   1 3226.96 296.930   1
  -2  -1   1 2879.98 286.826   3
   2  -1   1 43578.1 1388.05   1
  -2   1  -1 45454.7 1215.37   3
  -2   1  -1 47163.6 1382.89   1
  -2   1  -1 48131.1 1380.77   4
   2  -1   1 48225.8 1368.77   4
   3  -1   1 14075.0 829.917   1
  -3   1  -1 14931.2 818.633   1
  -3   1  -1 14688.1 553.516   3
   3   1   1 14587.3 834.924   1
   3  -1   1 15043.7 793.100   4
   4  -1   1 2207.57 383.403   4
   4  -1   1 2031.58 361.445   1
   4   1   1 2176.75 353.313   1
  -4   1  -1 2061.69 383.109   1
  -4   1  -1 2708.77 223.375   3
  -5   1  -1 50318.0 2042.03   1
   5  -1   1 52676.1 2020.01   4
  -5   1  -1 49230.5 1236.08   3
   5  -1   1 47735.9 2057.93   1
   5   1   1 50040.0 2087.04   1
   6   1   1 6412.50 775.254   1
  -6   1  -1 7777.61 795.063   1
   6  -1   1 6082.68 752.480   1
   6  -1   1 6341.20 731.326   4
  -7   1  -1 61460.8 2655.79   1
   7  -1   1 60801.9 2699.19   1
   7  -1   1 63730.9 2627.97   4
   8  -1   1 78415.6 3222.89   4
  -8   1  -1 86041.4 3354.47   1
  -9   1  -1 26299.3 1863.15   1
   9  -1   1 26077.6 1820.06   4
 -10   1  -1 9823.19 1184.56   1
  10  -1   1 8288.49 1082.61   4
  11   1   1 1181.52 615.853   4
  11  -1   1 389.625 393.334   4
  12   1   1 23506.2 2022.79   4
  12  -1   1 22595.1 1970.31   4
  13  -1   1 46808.2 3016.01   4
  13   1   1 50835.9 3103.77   4
  14   1   1 16393.6 1808.08   4
  14  -1   1 14614.0 1697.13   4
  15  -1   1 18508.2 2024.62   4
  15   1   1 16697.3 1883.53   4
  16  -1   1 2665.75 867.905   4
  16   1   1 5076.30 1123.07   4
  17   1   1-556.401 362.768   4
  17  -1   1 947.890 837.173   4
  17  -2  -1 15534.8 2093.39   4
  17   2  -1 12771.5 1898.75   4
 -16   2   1 14911.1 1939.75   1
  16  -2  -1 9718.99 1640.13   4
 -15   2   1 7484.61 1409.53   1
  15  -2  -1 4045.96 1094.49   4
  14  -2  -1 1440.45 699.248   4
 -14   2   1 655.197 484.150   1
  13  -2  -1 33129.9 2619.33   4
 -13   2   1 33094.6 2600.87   1
 -12   2   1 50592.7 3093.37   1
  12  -2  -1 48077.3 3049.36   4
  11  -2  -1 40509.8 2635.17   4
 -11   2   1 44442.0 2751.12   1
 -11   2   1 35537.9 1173.70   3
  10  -2  -1 2398.20 740.811   4
 -10   2   1 1261.34 572.435   1
  -9  -2   1 16072.2 1484.82   1
   9  -2  -1 17914.1 1586.61   4
  -9   2   1 15875.4 1477.96   1
  -8  -2   1 35507.4 2123.63   1
  -8   2   1 42630.9 2310.49   1
  -7  -2   1 58896.9 2638.96   1
  -7   2   1 64153.4 2725.51   1
   7  -2  -1 57072.6 2525.80   1
   6   2  -1 279274. 6954.66   1
  -6  -2   1 277738. 6907.43   1
   6  -2  -1 270547. 6784.68   1
  -6   2   1 290010. 6956.65   1
  -5  -2   1 97854.2 3185.31   1
  -5   2   1 107413. 3200.98   1
   5   2  -1 99287.7 3221.10   1
   5  -2  -1 100635. 3127.08   1
  -4   2   1 53153.9 1929.87   1
  -4  -2   1 52272.6 1955.00   1
   4   2  -1 52795.5 1982.85   1
   4  -2  -1 55056.7 1908.20   1
   4   2  -1 56962.0 1626.86   3
   3   2  -1 41587.3 1488.09   1
   3   2  -1 38886.1 1244.48   3
   3  -2  -1 39462.0 1486.41   4
   3  -2  -1 40256.6 1405.25   1
  -3  -2   1 37243.3 1446.17   1
  -3   2   1 37177.6 1373.08   1
   2   2  -1 132477. 2962.03   3
   2  -2  -1 132389. 3032.83   4
  -2   2   1 128805. 2965.56   1
   2  -2  -1 130880. 2983.50   1
   2   2  -1 127912. 2991.17   1
  -1   2   1 198257. 4009.04   2
  -1   2   1 194798. 3937.75   4
  -1  -2  -1 8305.75 456.276   2
  -1   2  -1 7269.47 331.918   1
   1   2   1 7817.94 451.434   2
   1  -2   1 7538.11 325.869   1
   2  -2   1 30198.6 1075.98   4
   2  -2   1 30678.4 1036.26   1
  -2  -2  -1 29560.9 1106.11   2
  -2   2  -1 32060.1 1054.48   1
  -2   2  -1 29299.7 1060.15   4
   3  -2   1 57215.1 1787.54   4
   3  -2   1 56672.0 1815.91   1
  -3   2  -1 57330.7 1808.74   1
  -3   2  -1 55439.4 1790.39   4
  -4   2  -1 196458. 4863.37   1
   4   2   1 206565. 4980.41   1
   4  -2   1 195413. 4858.20   1
   4  -2   1 204435. 4820.48   4
  -4   2  -1 208395. 4858.79   4
   5  -2   1 206362. 5138.77   4
   5   2   1 214294. 5357.32   1
   5  -2   1 195527. 5219.15   1
  -5   2  -1 206382. 5236.37   1
   6  -2   1 234807. 6216.58   1
  -6   2  -1 259609. 6304.16   1
   6  -2   1 243448. 6094.95   4
  -6   2  -1 236196. 4878.34   3
   6   2   1 254841. 6381.21   1
   7  -2   1 66755.4 2726.43   4
  -7   2  -1 66913.1 1674.46   3
  -7   2  -1 69039.3 2828.97   1
   7  -2   1 65399.0 2835.68   1
   8  -2   1 4972.95 762.788   4
  -8   2  -1 4851.43 781.777   1
   9  -2   1 24108.9 1756.36   4
  -9   2  -1 23297.9 1763.44   1
 -10   2  -1 42003.1 2550.03   1
  10  -2   1 43144.4 2529.20   4
 -11   2  -1 59586.3 3211.94   1
  11  -2   1 58632.7 3119.49   4
 -12   2  -1 48760.3 3017.33   1
  12  -2   1 50422.3 2991.11   4
  13   2   1 14026.3 1664.95   4
  13  -2   1 16921.0 1779.82   4
  14  -2   1 5238.29 1064.43   4
  14   2   1 7612.11 1254.75   4
  15  -2   1 1485.01 639.889   4
  15   2   1 1562.30 620.404   4
  16  -2   1 16098.8 1971.47   4
  16   2   1 18383.8 2067.99   4
  17   2   1 27378.8 2619.29   4
  17  -2   1 27168.7 2631.22   4
 -17   3   1 7244.02 1427.66   1
  17   3  -1 9354.64 1629.80   4
  17  -3  -1 10953.5 1754.95   4
 -16   3   1 25911.3 2531.24   1
  16  -3  -1 24039.9 2474.82   4
 -15   3   1 57867.0 3752.96   1
  15  -3  -1 60205.1 3790.92   4
 -14   3   1 45477.2 3152.10   1
  14  -3  -1 40737.5 3008.14   4
  13  -3  -1 17787.0 1954.83   4
 -13   3   1 21481.3 2083.85   1
 -12   3   1 19832.4 1901.16   1
  12  -3  -1 17605.7 1842.67   4
 -11   3   1 36950.7 2563.04   1
  11  -3  -1 37688.0 2580.06   4
 -10   3   1 66152.6 3326.18   1
  10  -3  -1 65706.0 3296.30   4
  -9   3   1 107545. 4122.75   1
   9  -3  -1 100547. 4027.34   4
  -8   3   1 31331.7 1933.74   1
   8  -3  -1 26878.6 1842.83   4
  -7   3   1 76023.0 2993.07   1
   7  -3  -1 70833.3 2975.05   4
   6   3  -1 27768.9 1613.49   1
   6   3  -1 24656.6 1057.39   3
  -6   3   1 25331.1 1491.89   1
   6  -3  -1 26456.4 1566.61   4
   6  -3  -1 25911.4 1512.51   1
   5   3  -1 68184.1 1961.90   3
  -5   3   1 68771.3 2423.59   1
   5  -3  -1 68946.3 2500.20   4
   5   3  -1 67773.7 2491.44   1
   5  -3  -1 64582.6 2353.21   1
   4  -3  -1 102415. 2929.70   1
   4  -3  -1 103790. 3066.89   4
   4   3  -1 104694. 3032.18   1
  -4   3   1 105833. 2973.67   1
   4   3  -1 106376. 2655.71   3
  -3   3   1 80709.5 2267.98   1
   3  -3  -1 77659.3 2251.96   1
   3  -3  -1 83818.5 2367.67   4
   3   3  -1 82226.2 2336.95   1
  -2   3   1 102596. 2614.98   2
   2  -3  -1 105043. 2641.29   1
  -2   3   1 110902. 2656.82   1
  -2  -3   1 113150. 2482.56   2
   2  -3  -1 111391. 2665.76   4
  -2   3   1 110266. 2674.72   4
  -1   3   1 66120.8 1626.78   4
   1  -3  -1 65653.2 1618.60   4
   1  -3  -1 60524.8 1676.46   2
  -1  -3   1 64234.3 1453.75   2
   1   3  -1 62151.8 1461.74   2
   0   3   1 158588. 3166.00   2
   0  -3  -1 153985. 3137.63   2
   1   3   1 64214.0 1742.69   2
  -1  -3  -1 62481.9 1715.52   2
  -1   3  -1 63457.5 1493.63   1
  -2   3  -1 312775. 6426.33   1
   2   3   1 334248. 6729.69   2
  -2  -3  -1 321246. 6657.57   2
  -2   3  -1 309329. 6667.95   4
   2  -3   1 339515. 6429.50   1
  -3   3  -1 264624. 5677.92   1
  -3   3  -1 265561. 5739.61   4
   3  -3   1 258836. 5605.73   1
   3  -3   1 266713. 5766.18   4
  -3  -3  -1 253541. 5754.37   2
   4  -3   1 63871.7 2158.32   4
  -4   3  -1 61318.5 2138.26   4
   4  -3   1 63235.3 2123.30   1
  -4   3  -1 63849.4 2155.39   1
  -5   3  -1 54.3639 200.310   1
   5  -3   1 20.4222 190.570   4
  -5   3  -1 770.111 331.496   4
   5   3   1 167.054 211.289   1
   5  -3   1 120.909 208.368   1
   6   3   1 118930. 3734.83   1
   6  -3   1 102155. 3475.69   1
  -6   3  -1 115296. 3619.62   1
   6  -3   1 101720. 3432.28   4
  -7   3  -1 88726.9 3310.31   1
   7   3   1 83048.6 1857.66   3
   7  -3   1 92290.6 3257.15   4
   7  -3   1 89286.1 3285.50   1
  -8   3  -1 249641. 6709.89   1
   8  -3   1 231691. 6490.69   4
  -8   3  -1 234313. 4948.98   3
  -9   3  -1 134177. 4627.91   1
   9  -3   1 129300. 4511.68   4
  -9   3  -1 122393. 2841.54   3
  10  -3   1 52341.3 2801.46   4
 -10   3  -1 53197.5 2863.49   1
 -11   3  -1 6151.65 1026.37   1
  11  -3   1 4511.96 895.733   4
 -12   3  -1 3733.45 851.427   1
  12  -3   1 4450.03 952.987   4
  13  -3   1 35240.4 2610.86   4
 -13   3  -1 34709.3 2595.08   1
  14  -3   1 33047.9 2629.26   4
  14   3   1 35999.5 2685.42   4
  15   3   1 48054.3 3207.44   4
  15  -3   1 40718.5 3056.44   4
  16   3   1 22733.5 2284.04   4
  16  -3   1 22718.3 2337.81   4
  17  -3   1 430.467 582.206   4
  17   3   1-23.9117 517.321   4
 -17   4   1 25943.1 2628.70   1
  17  -4  -1 22317.9 2460.61   4
 -16   4   1 8891.05 1558.90   1
  16  -4  -1 13084.1 1849.82   4
  15  -4  -1 260.919 485.477   4
 -15   4   1 741.761 599.318   1
 -14   4   1 17721.2 2002.21   1
  14  -4  -1 15307.3 1807.79   4
 -13   4   1 64344.1 3667.20   1
  13  -4  -1 57714.7 3504.82   4
  12  -4  -1 82809.2 4095.21   4
 -12   4   1 83074.9 4111.68   1
  11  -4  -1 75828.9 3750.81   4
 -11   4   1 77941.7 3813.46   1
  10  -4  -1 18820.2 1723.48   4
 -10   4   1 19738.9 1733.52   1
   9  -4  -1 1651.59 548.711   4
  -9   4   1 1985.38 516.679   1
  -8   4   1 97567.5 3672.70   1
   8  -4  -1 88023.0 3606.97   4
   7   4  -1 115175. 3036.65   3
   7  -4  -1 112407. 3922.41   4
  -7   4   1 120938. 3923.18   1
  -6   4   1 245416. 6142.49   1
   6   4  -1 241524. 5357.12   3
   6  -4  -1 234265. 6196.08   4
   6   4  -1 244060. 6251.76   1
   6  -4  -1 239892. 6064.19   1
   5  -4  -1 207714. 5366.09   4
  -5   4   1 211811. 5261.12   1
   5  -4  -1 205971. 5205.24   1
   5   4  -1 211277. 5398.46   1
   5   4  -1 216711. 4793.20   3
  -4   4   1 35328.7 1472.13   1
   4  -4  -1 33334.7 1442.66   1
   4  -4  -1 32619.7 1481.07   4
   4   4  -1 32092.9 1491.87   1
  -3   4   1 14771.6 828.322   1
  -3  -4   1 13805.8 739.357   2
   3  -4  -1 15178.4 837.368   1
  -3   4   1 13633.0 829.701   4
   3  -4  -1 14379.9 846.431   4
  -3   4   1 13971.9 805.125   2
   2  -4  -1 22893.4 969.221   4
   2  -4  -1 24920.4 1024.35   2
  -2   4   1 22712.9 983.433   1
  -2   4   1 23418.5 986.368   4
  -2   4   1 22914.9 971.028   2
  -2  -4   1 22801.3 852.205   2
  -1   4   1 99054.2 2461.38   2
   1   4  -1 99443.6 2205.54   2
  -1   4   1 97139.4 2375.43   4
  -1  -4   1 98559.9 2197.02   2
   1  -4  -1 97796.1 2466.17   2
   0  -4   1 682470. 12883.1   2
   0   4  -1 689557. 12882.2   2
   0  -4  -1 722407. 13269.0   2
   0   4   1 708256. 13256.0   2
  -1  -4  -1 31454.5 1146.48   2
  -1   4  -1 30805.8 948.329   1
  -1   4  -1 28992.8 958.589   2
   1   4   1 30899.7 1153.17   2
   2   4   1 30225.4 1227.69   2
  -2   4  -1 30731.1 1236.13   4
   2  -4   1 30209.8 1031.77   1
  -2   4  -1 31505.5 1070.43   1
  -2  -4  -1 31301.2 1222.71   2
  -3  -4  -1 8744.63 674.819   2
   3  -4   1 8498.85 654.200   4
  -3   4  -1 8347.53 663.565   4
  -3   4  -1 8691.48 605.921   1
   3  -4   1 8900.37 594.547   1
   4  -4   1 144199. 3902.59   4
  -4   4  -1 148580. 3850.69   1
  -4   4  -1 152943. 3963.79   4
  -4  -4  -1 142864. 3910.95   2
   4  -4   1 150504. 3787.45   1
   5  -4   1 132821. 3843.34   1
   5  -4   1 135376. 3936.25   4
  -5   4  -1 141244. 3977.13   4
  -5   4  -1 144715. 3937.13   1
   6  -4   1 119161. 3751.11   4
  -6   4  -1 115831. 3701.86   1
   6  -4   1 117810. 3696.41   1
   7  -4   1 25853.5 1632.84   1
   7  -4   1 25667.5 1607.15   4
  -7   4  -1 25524.2 1643.24   1
  -8   4  -1 5685.58 850.959   1
   8  -4   1 5428.36 776.851   4
   8   4   1 5516.64 347.351   3
   9  -4   1 55792.1 2772.48   4
  -9   4  -1 55266.4 2814.45   1
  10  -4   1 54484.8 2907.72   4
 -10   4  -1 53897.2 1662.10   3
 -10   4  -1 60186.3 3039.53   1
 -11   4  -1 53118.6 3007.86   1
  11  -4   1 48512.3 2878.35   4
  12  -4   1 76312.0 3824.96   4
 -12   4  -1 77642.7 3849.39   1
  13  -4   1 17217.7 1832.27   4
 -13   4  -1 17970.4 1869.12   1
  14  -4   1 2620.80 720.251   4
 -14   4  -1 2940.60 832.403   1
  15   4   1 2117.70 835.642   4
  15  -4   1 749.294 478.716   4
  16   4   1 22130.0 2272.12   4
  16  -4   1 23516.0 2383.44   4
  17   4   1 34503.4 2920.58   4
 -17   5   1 3685.10 1098.22   1
  16  -5  -1 24136.9 2482.14   4
 -16   5   1 23497.2 2434.08   1
 -15   5   1 33341.3 2827.00   1
  15  -5  -1 30085.1 2745.29   4
  14  -5  -1 22894.2 2252.80   4
 -14   5   1 24134.5 2342.31   1
 -13   5   1 4683.74 1017.80   1
  13  -5  -1 3499.60 959.551   4
  12  -5  -1 3803.00 919.660   4
 -12   5   1 4256.45 995.651   1
  11  -5  -1 29049.2 2248.17   4
 -11   5   1 28712.4 2246.67   1
 -10   5   1 83021.8 3674.95   1
  10  -5  -1 69065.8 3467.98   4
  -9   5   1 67978.3 3126.72   1
   9  -5  -1 59274.3 3025.61   4
   8   5  -1 38487.0 1546.27   3
  -8   5   1 40177.0 2213.74   1
   8  -5  -1 38001.9 2202.97   4
  -7   5   1 36623.9 1963.05   1
   7   5  -1 34245.7 1441.50   3
   7  -5  -1 35313.2 1991.94   4
   6  -5  -1 43.6223 183.419   1
   6   5  -1 325.308 280.249   1
   6  -5  -1 543.134 293.498   4
   6   5  -1 158.160 156.937   3
  -6   5   1 326.941 222.217   1
   5   5  -1 140101. 4029.37   1
   5  -5  -1 140093. 3903.45   1
  -5   5   1 137413. 3918.76   1
   5  -5  -1 137807. 4003.27   4
   4  -5  -1 364532. 7858.76   4
  -4   5   1 355378. 7853.85   4
  -4   5   1 360761. 7737.61   1
   4  -5  -1 358656. 7729.40   1
  -4  -5   1 345035. 7562.28   2
  -3   5   1 331862. 7173.55   2
  -3   5   1 337689. 7212.97   4
  -3   5   1 340052. 7178.85   1
   3  -5  -1 341945. 7226.27   4
  -3  -5   1 329634. 6921.04   2
   2  -5  -1 199154. 4500.32   2
  -2   5   1 196121. 4472.55   1
   2   5  -1 206769. 4261.38   2
  -2   5   1 189630. 4417.01   2
  -2  -5   1 191564. 4164.98   2
  -2   5   1 187269. 4409.70   4
  -1   5   1 18095.9 838.001   4
  -1  -5   1 18202.9 731.610   2
   1  -5  -1 18968.2 901.026   2
  -1   5   1 17751.0 877.997   2
   1   5  -1 18772.1 740.934   2
   0  -5  -1 263.626 177.699   2
   0   5  -1 196.131 99.0449   2
   0  -5   1 219.496 137.055   2
   1   5   1 26011.7 1096.78   2
  -1  -5  -1 26921.9 1106.65   2
  -1   5  -1 25108.3 927.408   2
  -2   5  -1 127509. 3282.00   4
   2   5   1 129261. 3262.44   2
  -2   5  -1 125488. 2959.18   1
  -2   5  -1 120845. 2986.90   2
  -2  -5  -1 120502. 3169.82   2
  -3   5  -1 85295.2 2419.55   1
  -3  -5  -1 84271.1 2593.53   2
   3  -5   1 89311.8 2395.00   1
  -3   5  -1 90082.9 2687.64   4
  -4  -5  -1 137219. 3812.67   2
   4  -5   1 136166. 3593.30   1
  -4   5  -1 145998. 3704.89   1
  -4   5  -1 142167. 3880.60   4
   4  -5   1 136758. 3809.58   4
  -5  -5  -1 99915.8 3240.51   2
   5  -5   1 98908.8 3229.77   4
  -5   5  -1 100491. 3258.83   4
  -5   5  -1 107138. 3213.39   1
   5  -5   1 99084.5 3069.47   1
  -6  -5  -1 1843.05 497.926   2
  -6   5  -1 1545.18 420.740   1
   6  -5   1 1829.75 398.811   4
   6  -5   1 1027.43 306.202   1
   7  -5   1 69824.3 2894.24   4
  -7   5  -1 71675.8 2900.55   1
   8  -5   1 103577. 3906.83   4
  -8   5  -1 110065. 3958.02   1
   9  -5   1 61377.7 3026.22   4
  -9   5  -1 68450.5 3198.57   1
   9   5   1 67706.3 1778.52   3
 -10   5  -1 29888.9 2133.55   1
  10  -5   1 26596.4 1991.03   4
  11  -5   1 1963.38 620.180   4
 -11   5  -1 1376.23 498.627   1
 -12   5  -1 10862.0 1414.93   1
  12  -5   1 6002.94 1031.39   4
  13  -5   1 28545.1 2364.41   4
 -13   5  -1 26800.4 2288.14   1
  14  -5   1 31493.5 2597.63   4
 -14   5  -1 34718.0 2722.59   1
 -15   5  -1 21081.8 2202.09   1
  15  -5   1 16911.3 1968.65   4
  16  -5   1 7667.95 1381.98   4
  16   5   1 8379.75 1420.48   4
  17   5   1 583.861 451.714   4
  16  -6  -1 1433.48 700.271   4
 -16   6   1 1440.35 729.330   1
  15  -6  -1 709.256 469.237   4
 -15   6   1 2125.47 912.500   1
  14  -6  -1 10788.3 1543.38   4
 -14   6   1 11397.8 1595.42   1
  13  -6  -1 14656.4 1730.59   4
 -13   6   1 14667.9 1770.86   1
  12  -6  -1 26775.0 2276.04   4
 -12   6   1 31464.9 2456.23   1
  11  -6  -1 23064.0 1976.92   4
 -11   6   1 23244.8 1977.11   1
 -10   6   1 4008.36 779.194   1
  10  -6  -1 4027.33 809.579   4
  -9   6   1 166.116 341.356   1
   9  -6  -1 993.067 479.644   4
   9   6  -1 855.956 285.902   3
   8   6  -1 13263.2 910.238   3
   8  -6  -1 12874.6 1267.61   4
  -8   6   1 11429.0 1197.37   1
  -7   6   1 206814. 5709.60   1
   7   6  -1 202011. 4946.62   3
   7  -6  -1 196265. 5720.81   4
  -6   6   1 148508. 4340.87   1
   6  -6  -1 144944. 4407.85   4
   5  -6  -1 83558.9 2929.03   4
  -5   6   1 88161.7 2979.97   4
  -5   6   1 85118.9 2870.55   1
   5  -6  -1 85356.8 2829.92   1
  -5  -6   1 87297.0 2797.18   2
  -4  -6   1 33438.6 1426.49   2
   4  -6  -1 35932.2 1629.35   4
  -4   6   1 36884.9 1589.24   1
  -4   6   1 34980.1 1617.47   4
  -4   6   1 35578.8 1565.58   2
  -3  -6   1 2208.78 314.830   2
   3  -6  -1 1979.00 351.309   4
  -3   6   1 2132.00 342.039   1
  -3   6   1 2238.57 369.665   4
  -3   6   1 2359.07 358.953   2
  -2   6   1 4337.18 471.063   4
  -2   6   1 4802.82 476.622   2
   2   6  -1 5353.65 445.755   2
  -2  -6   1 5253.55 447.538   2
   2  -6  -1 4458.55 473.293   2
  -1   6   1 27880.4 1189.55   2
   1  -6  -1 27593.1 1189.13   2
   1   6  -1 25693.9 990.258   2
  -1  -6   1 28098.7 1025.55   2
   0   6   1 9467.90 652.430   2
   0  -6   1 7876.93 503.674   2
   0  -6  -1 8763.34 633.633   2
   0   6  -1 9072.86 532.795   2
  -1   6  -1 138620. 3301.87   2
  -1  -6  -1 148039. 3589.09   2
   1   6   1 145115. 3590.83   2
  -2   6  -1 62868.5 1861.28   1
   2   6   1 61702.7 2073.54   2
  -2   6  -1 65475.7 1924.78   2
   3   6   1 19854.9 1121.58   2
  -3   6  -1 19730.1 1135.46   4
  -3  -6  -1 18770.3 1064.11   2
  -3   6  -1 18380.5 957.607   1
  -4  -6  -1 76202.0 2604.29   2
  -4   6  -1 83722.0 2732.14   4
  -4   6  -1 79950.0 2496.95   1
   4  -6   1 75257.0 2396.29   1
  -5   6  -1 132189. 3725.15   1
   5  -6   1 125865. 3608.82   1
  -5  -6  -1 123999. 3782.13   2
   5  -6   1 126062. 3835.29   4
  -6   6  -1 70253.1 2672.04   1
  -6  -6  -1 64717.5 2664.83   2
   6  -6   1 68619.5 2759.08   4
   6  -6   1 69752.9 2597.17   1
   7  -6   1 18334.9 1405.54   4
  -7  -6  -1 17117.2 1369.29   2
   8  -6   1-154.554 361.456   4
  -8  -6  -1 330.177 390.904   2
  -8   6  -1-106.035 283.205   1
  -9   6  -1-172.906 305.186   1
   9  -6   1 102.496 352.467   4
  10  -6   1 6468.93 1014.52   4
  10   6   1 7958.79 526.525   3
  11  -6   1 22911.1 1976.63   4
 -11   6  -1 28572.2 2181.86   1
  12  -6   1 8037.41 1245.30   4
 -12   6  -1 10589.2 1411.95   1
  13  -6   1 14884.1 1703.53   4
 -13   6  -1 15675.9 1763.46   1
 -14   6  -1 1965.56 804.957   1
  14  -6   1 3569.02 888.725   4
 -15   6  -1 413.294 419.165   1
  15  -6   1 495.521 581.952   4
  16  -6   1 3803.89 973.994   4
 -16   6  -1 4633.33 1120.95   1
  17   6   1 3552.01 1043.55   4
 -16   7   1 407.623 476.255   1
  16  -7  -1 280.318 442.477   4
  15  -7  -1 116.309 590.045   4
 -15   7   1-953.698 710.385   1
 -14   7   1 651.889 594.668   1
  14  -7  -1 607.456 566.602   4
 -13   7   1 4366.74 997.614   1
  13  -7  -1 2724.19 795.448   4
  12  -7  -1-442.424 488.938   4
 -12   7   1-16.1530 446.100   1
  11  -7  -1 450.470 361.460   4
 -11   7   1 1138.16 515.919   1
 -10   7   1 358.987 349.443   1
  10  -7  -1 153.098 366.797   4
  10   7  -1 809.128 298.076   3
   9  -7  -1 24.2640 295.518   4
  -9   7   1-330.618 323.176   1
   9   7  -1 128.321 168.181   3
   8   7  -1 11418.2 887.901   3
  -8   7   1 13059.3 1265.28   1
  -8  -7   1 11795.2 1167.56   2
   8  -7  -1 11150.4 1207.47   4
   7  -7  -1-4.13546 293.729   4
  -7  -7   1 636.426 271.749   2
  -7   7   1 715.554 333.177   1
   6  -7  -1 2549.67 508.761   4
  -6  -7   1 3391.43 517.662   2
  -6   7   1 2871.16 508.084   1
   5  -7  -1 832.093 293.663   4
  -5  -7   1 1449.94 353.278   2
  -5   7   1 1953.35 439.548   4
  -5   7   1 1592.49 390.845   1
  -4  -7   1 5088.91 543.321   2
   4  -7  -1 5416.97 614.245   4
  -4   7   1 5324.29 598.531   1
  -4   7   1 6178.92 663.581   4
  -3   7   1 97038.5 2897.13   4
   3   7  -1 95930.0 2707.03   2
  -3   7   1 92579.3 2807.64   2
  -3   7   1 92310.1 2830.24   1
  -3  -7   1 92593.7 2616.29   2
   2   7  -1 95399.0 2592.35   2
   2  -7  -1 100411. 2872.05   2
  -2  -7   1 96416.2 2559.92   2
  -2   7   1 98571.6 2819.82   2
  -2   7   1 92757.6 2781.44   4
  -1  -7   1 22885.2 980.687   2
   1  -7  -1 22743.8 1126.27   2
  -1   7   1 24089.4 1157.57   2
   1   7  -1 24029.3 1011.88   2
   0   7   1 18021.8 983.327   2
   0  -7   1 16032.6 792.934   2
   0  -7  -1 16130.0 925.482   2
   0   7  -1 15242.4 783.654   2
   1  -7   1 219.715 157.060   2
   1   7   1 165.985 160.307   2
  -1   7  -1 106.037 124.064   2
  -1  -7  -1 39.7231 155.119   2
  -2   7  -1 4336.08 436.241   1
  -2   7  -1 5966.60 513.109   2
   2   7   1 5296.80 563.030   2
  -2  -7  -1 5262.25 553.794   2
  -3   7  -1 1024.57 277.797   1
  -3   7  -1 879.023 279.149   4
  -3   7  -1 820.420 268.779   2
  -3  -7  -1 801.920 276.422   2
   3   7   1 1383.00 337.318   2
  -4   7  -1 3843.13 541.363   4
  -4  -7  -1 3263.97 477.067   2
  -4   7  -1 3068.19 457.203   1
  -5   7  -1 1451.82 360.530   1
  -5  -7  -1 849.528 328.104   2
   5  -7   1 938.461 263.180   1
   6  -7   1 2048.80 441.993   1
   6  -7   1 2888.98 523.791   4
  -6  -7  -1 1946.73 503.779   2
  -6   7  -1 2279.31 476.138   1
  -7   7  -1 596.363 354.692   1
   7  -7   1 1022.17 406.954   4
   8  -7   1 8059.50 989.311   4
  -8   7  -1 8260.59 987.577   1
  -8  -7  -1 8921.25 1059.44   2
  -9  -7  -1 774.197 376.346   2
  -9   7  -1 497.494 407.227   1
   9  -7   1 305.977 324.783   4
  10   7   1 3149.89 389.246   3
 -10   7  -1 1738.01 534.426   1
  10  -7   1 2024.67 620.052   4
  11  -7   1 111.219 407.683   4
 -11   7  -1 226.427 440.789   1
 -11  -7  -1-283.621 503.995   2
 -12  -7  -1 587.747 540.345   2
  12  -7   1 129.539 535.309   4
 -12   7  -1 850.195 463.863   1
 -13   7  -1 1428.16 610.814   1
  13  -7   1 1643.61 564.501   4
 -13  -7  -1 1887.15 743.378   2
  14  -7   1 218.636 396.825   4
 -14  -7  -1-734.104 662.445   2
  15  -7   1 819.361 472.056   4
 -15  -7  -1-370.906 694.483   2
 -15   7  -1-52.7168 575.899   1
 -16   7  -1 485.062 480.539   1
  16  -7   1-512.170 667.917   4
 -16  -7  -1 84.6123 591.998   2
 -16   8   1 2696.01 971.223   1
  16  -8  -1 2660.26 892.773   4
 -16  -8   1 3359.82 1018.36   2
  15  -8  -1 1674.84 771.222   4
 -15   8   1 1093.70 795.537   1
 -15  -8   1 1448.75 693.654   2
 -14   8   1 645.460 522.695   1
 -14  -8   1 984.497 719.106   2
  14  -8  -1-460.219 482.376   4
 -13   8   1 14444.9 1792.71   1
 -13  -8   1 10364.1 1492.27   2
  13  -8  -1 13589.6 1701.36   4
  12  -8  -1 26792.2 2309.47   4
 -12  -8   1 28665.3 2314.61   2
 -11  -8   1 11190.2 1378.49   2
 -11   8   1 13354.5 1529.31   1
  11  -8  -1 13929.2 1584.67   4
  10  -8  -1 2406.50 671.581   4
  10   8  -1 2400.78 456.724   3
 -10   8   1 2525.11 634.591   1
 -10  -8   1 1685.77 537.393   2
   9  -8  -1-15.6413 325.062   4
  -9  -8   1 59.4133 306.879   2
  -9   8   1 580.885 356.549   1
   9   8  -1-261.451 269.338   3
  -8   8   1 2367.49 598.364   1
   8   8  -1 1165.19 268.156   3
   8  -8  -1 756.079 284.351   4
  -8  -8   1 2162.25 574.743   2
  -7  -8   1 452.083 316.966   2
   7  -8  -1 69.0117 315.782   4
  -7   8   1 573.855 316.900   1
  -6  -8   1 45790.4 2077.99   2
  -6   8   1 46481.9 2186.51   1
   6  -8  -1 48448.8 2295.18   4
   5  -8  -1 15252.2 1168.84   4
  -5   8   1 16960.7 1190.85   1
  -5  -8   1 16606.0 1107.12   2
  -4   8   1 1968.85 420.489   4
  -4   8   1 941.958 266.410   1
  -4   8   1 1670.70 358.404   2
  -4  -8   1 1485.66 313.384   2
   3   8  -1 3262.30 415.774   2
  -3   8   1 3044.78 443.538   2
  -3   8   1 3283.30 479.114   4
  -3   8   1 3328.53 449.278   1
  -3  -8   1 2690.25 357.865   2
  -2  -8   1 116664. 3093.48   2
  -2   8   1 116330. 3321.01   2
   2  -8  -1 122400. 3408.77   2
  -2   8   1 115604. 3351.82   4
   2   8  -1 125181. 3187.45   2
   1   8  -1 184846. 4249.20   2
  -1   8   1 184602. 4523.52   2
   1  -8  -1 180250. 4520.44   2
  -1  -8   1 177224. 4195.46   2
   0   8  -1 177191. 4106.53   2
   0  -8   1 173340. 4086.42   2
   0   8   1 173797. 4375.20   2
   0  -8  -1 174079. 4389.64   2
   1   8   1 22532.8 1182.88   2
   1  -8   1 20865.2 1028.86   2
  -1   8  -1 20331.6 1000.55   2
  -1  -8  -1 21007.5 1155.22   2
  -2   8  -1 8100.66 644.085   1
   2   8   1 9090.89 772.772   2
  -2   8  -1 7465.04 613.657   2
  -2  -8  -1 8724.20 745.139   2
   3   8   1 11958.3 933.450   2
  -3  -8  -1 11661.1 902.843   2
  -3   8  -1 11115.5 789.943   1
  -3   8  -1 12088.9 836.608   2
  -4   8  -1 8345.85 746.522   1
  -4  -8  -1 8989.91 817.259   2
  -4   8  -1 9602.58 804.169   2
  -5   8  -1 8513.81 805.018   1
  -5  -8  -1 8777.10 876.771   2
  -6   8  -1 39214.1 1958.10   1
  -6  -8  -1 38072.5 2008.33   2
  -7  -8  -1 21755.5 1556.91   2
  -7   8  -1 22296.6 1541.21   1
  -8   8  -1 4794.77 780.594   1
   8  -8   1 4316.49 747.652   4
  -8  -8  -1 4270.89 725.084   2
  -9   8  -1 860.540 418.975   1
   9  -8   1 178.434 389.791   4
  -9  -8  -1 924.093 477.705   2
 -10   8  -1 8523.79 1191.18   1
  10  -8   1 5917.10 937.838   4
 -10  -8  -1 6948.90 1047.80   2
 -11   8  -1 10179.8 1342.30   1
 -11  -8  -1 10358.2 1358.50   2
  11  -8   1 11523.9 1416.41   4
 -12  -8  -1 11511.7 1483.73   2
 -12   8  -1 12653.7 1552.07   1
  12  -8   1 9038.68 1323.68   4
  13  -8   1-584.233 594.639   4
 -13  -8  -1 883.137 586.096   2
 -13   8  -1 611.135 551.625   1
 -14  -8  -1 959.153 598.527   2
  14  -8   1-589.430 586.329   4
 -14   8  -1-238.203 584.946   1
 -15   8  -1 1175.20 680.508   1
  15  -8   1-333.179 674.457   4
 -15  -8  -1 1255.88 872.706   2
 -16   8  -1 7486.53 1388.94   1
 -16  -9   1 13302.1 1845.48   2
 -16   9   1 15270.5 2054.40   1
  15  -9  -1 23919.0 2459.71   4
 -15  -9   1 22461.8 2337.60   2
 -15   9   1 27862.5 2658.87   1
 -14   9   1 30558.2 2676.53   1
  14  -9  -1 28933.9 2647.73   4
 -14  -9   1 25617.9 2393.78   2
  13  -9  -1 10147.3 1547.23   4
 -13  -9   1 12929.7 1599.84   2
 -13   9   1 13050.2 1708.20   1
  12  -9  -1 1320.48 632.972   4
 -12  -9   1 1690.77 657.327   2
 -12   9   1 887.200 549.236   1
 -11   9   1 35782.9 2483.86   1
 -11  -9   1 36360.0 2464.95   2
 -10  -9   1 72179.5 3436.10   2
  10   9  -1 71215.4 2764.21   3
 -10   9   1 80430.9 3697.30   1
  10  -9  -1 72518.8 3642.10   4
  -9   9   1 68594.0 3262.48   1
   9   9  -1 69233.3 2686.97   3
   9  -9  -1 74448.6 3483.46   4
   8  -9  -1 35007.2 2228.89   4
  -8   9   1 36030.4 2169.15   1
  -8  -9   1 37290.2 2130.95   2
  -7   9   1 7659.97 924.736   1
   7  -9  -1 5787.47 826.421   4
  -7  -9   1 6383.12 801.108   2
  -6  -9   1 6991.32 770.715   2
  -6   9   1 7240.69 821.914   1
   6  -9  -1 6448.57 803.397   4
  -5  -9   1 38861.7 1790.57   2
  -5   9   1 39143.5 1913.24   1
  -4  -9   1 64549.4 2288.49   2
  -4   9   1 64471.3 2483.22   1
  -3   9   1 184126. 4735.55   1
  -3  -9   1 174470. 4405.98   2
  -3   9   1 169663. 4707.30   4
   3   9  -1 179707. 4498.04   2
  -2   9   1 165755. 4372.64   4
  -2   9   1 162157. 4287.84   2
   2  -9  -1 165796. 4369.90   2
   2   9  -1 162352. 4073.44   2
  -2  -9   1 154728. 3994.21   2
   1  -9  -1 94866.3 2995.29   2
  -1   9   1 100914. 3025.07   2
   1   9  -1 101685. 2808.23   2
  -1  -9   1 97360.5 2780.89   2
   0   9  -1 2407.33 346.851   2
   0  -9  -1 2294.90 386.252   2
   0  -9   1 1817.21 330.992   2
   0   9   1 1684.88 354.408   2
  -1  -9  -1 104144. 3159.51   2
   1   9   1 107769. 3194.57   2
  -1   9  -1 105317. 2919.45   2
   1  -9   1 104788. 2969.97   2
  -2   9  -1 148764. 3793.60   2
   2   9   1 145720. 4055.04   2
  -2  -9  -1 135471. 3932.35   2
  -2   9  -1 148469. 3815.25   1
  -3   9  -1 233837. 5514.24   1
  -3  -9  -1 227750. 5711.66   2
  -3   9  -1 228583. 5467.09   2
  -4  -9  -1 74448.5 2699.82   2
  -4   9  -1 76367.1 2558.10   1
  -5  -9  -1 7801.00 857.822   2
  -5   9  -1 9552.89 878.507   1
  -6   9  -1 3000.77 509.736   1
  -6  -9  -1 3090.85 629.536   2
  -7   9  -1 48935.7 2380.55   1
  -7  -9  -1 46959.6 2440.16   2
  -8  -9  -1 61818.2 2957.79   2
  -8   9  -1 62501.0 2937.76   1
  -9   9  -1 36288.2 2273.49   1
   9  -9   1 31378.7 2198.31   4
  -9  -9  -1 32443.2 2191.50   2
 -10  -9  -1 9745.07 1270.45   2
 -10   9  -1 10718.6 1295.03   1
  10  -9   1 7323.26 1071.73   4
 -11   9  -1 800.193 487.583   1
 -11  -9  -1 904.940 528.556   2
  11  -9   1 373.357 358.689   4
 -12   9  -1 3109.39 789.564   1
 -12  -9  -1 3200.16 829.494   2
  12  -9   1 1964.23 556.518   4
 -13   9  -1 9710.15 1453.02   1
  13  -9   1 8171.23 1293.29   4
 -13  -9  -1 8626.05 1409.43   2
 -14  -9  -1 14708.7 1850.71   2
  14  -9   1 17711.0 2009.35   4
 -14   9  -1 16051.6 1899.92   1
  15  -9   1 19298.6 2233.22   4
 -15  -9  -1 22780.9 2411.36   2
 -15   9  -1 21959.6 2289.25   1
 -16   9  -1 7531.62 1434.83   1
 -16 -10   1 8418.40 1557.67   2
 -16  10   1 8504.92 1579.00   1
  15 -10  -1 422.976 570.929   4
 -15 -10   1 140.173 434.353   2
 -15  10   1 935.437 764.582   1
 -14  10   1 23327.4 2344.46   1
 -14 -10   1 24562.8 2346.13   2
  14 -10  -1 22973.3 2364.54   4
 -13  10   1 60401.1 3677.79   1
  13 -10  -1 58651.8 3752.27   4
 -13 -10   1 62291.5 3691.96   2
 -12 -10   1 80719.4 4056.83   2
  12 -10  -1 85141.4 4357.29   4
 -12  10   1 88512.6 4347.93   1
 -11  10   1 57989.3 3287.69   1
  11 -10  -1 51532.8 3217.54   4
 -11 -10   1 58050.6 3192.78   2
 -10  10   1 26557.8 2068.16   1
 -10 -10   1 22041.7 1866.36   2
  10 -10  -1 23275.4 1987.57   4
  -9 -10   1 989.144 479.974   2
  -9  10   1 937.770 422.206   1
   9 -10  -1 482.029 302.476   4
  -8 -10   1 19292.9 1502.05   2
   8 -10  -1 18303.6 1596.03   4
  -8  10   1 18674.4 1587.85   1
  -7  10   1 69101.6 2980.72   1
  -7 -10   1 69560.1 2884.13   2
  -6  10   1 125384. 4126.05   1
  -6 -10   1 126675. 3965.83   2
  -5 -10   1 126596. 3837.49   2
  -5  10   1 136742. 4163.45   1
  -4 -10   1 20761.6 1227.28   2
  -4  10   1 20222.6 1335.12   1
  -3 -10   1 1370.72 297.305   2
  -3  10   1 868.758 307.720   1
   3  10  -1 934.843 278.774   2
  -2  10   1 23269.7 1393.04   4
   2 -10  -1 23675.9 1367.11   2
   2  10  -1 21903.5 1208.01   2
  -2 -10   1 23085.8 1196.70   2
   1  10  -1 177017. 4395.40   2
  -1 -10   1 177826. 4410.79   2
   1 -10  -1 174104. 4652.91   2
   0  10  -1 158549. 3984.69   2
   0 -10  -1 159858. 4281.08   2
  -1  10  -1 131659. 3500.79   2
   1 -10   1 124937. 3511.03   2
  -1 -10  -1 125430. 3703.65   2
  -2  10  -1 10274.3 793.288   2
  -2 -10  -1 9932.92 879.474   2
  -2  10  -1 9833.99 806.724   1
  -3 -10  -1 16356.3 1160.82   2
  -3  10  -1 17867.1 1127.83   2
  -3  10  -1 17714.2 1124.36   1
  -4 -10  -1 52778.6 2294.72   2
  -4  10  -1 53293.8 2157.44   1
  -5 -10  -1 139308. 4403.42   2
  -5  10  -1 151626. 4324.58   1
  -6  10  -1 107274. 3655.79   1
  -6 -10  -1 106138. 3797.92   2
  -7 -10  -1 66514.5 3018.05   2
  -7  10  -1 71346.4 2977.64   1
  -8 -10  -1 11084.1 1216.52   2
  -8  10  -1 10037.1 1138.59   1
  -9  10  -1 2574.42 633.051   1
  -9 -10  -1 1498.08 534.629   2
 -10  10  -1 15167.2 1539.56   1
 -10 -10  -1 15011.8 1564.05   2
 -11  10  -1 44479.1 2842.83   1
 -11 -10  -1 41952.1 2793.84   2
 -12  10  -1 30058.2 2420.02   1
 -12 -10  -1 23851.8 2196.86   2
  12 -10   1 27742.4 2357.83   4
 -13 -10  -1 8334.83 1355.17   2
  13 -10   1 5535.64 1079.32   4
 -13  10  -1 8289.72 1345.93   1
  14 -10   1 562.884 380.385   4
 -14 -10  -1 86.3925 453.028   2
 -14  10  -1-780.899 647.330   1
 -15 -10  -1 4019.86 1108.45   2
 -15  10  -1 5082.20 1172.76   1
 -16  10  -1 18579.3 2186.42   1
 -16 -11   1 14253.4 1964.28   2
 -15 -11   1 25594.4 2515.83   2
 -15  11   1 29113.7 2769.59   1
  14 -11  -1 36050.9 3015.05   4
 -14  11   1 35255.0 2923.56   1
 -14 -11   1 30755.1 2666.01   2
  13 -11  -1 6720.54 1274.60   4
 -13  11   1 6673.49 1269.84   1
 -13 -11   1 4361.24 966.789   2
 -12 -11   1-272.936 356.596   2
  12 -11  -1-155.461 420.862   4
 -12  11   1-680.070 583.517   1
 -11  11   1 27856.0 2281.11   1
 -11 -11   1 25844.8 2071.50   2
  11 -11  -1 21252.7 2051.97   4
 -10  11   1 77591.5 3775.78   1
 -10 -11   1 72371.0 3499.17   2
  10 -11  -1 70093.5 3699.27   4
  -9 -11   1 60884.3 3042.96   2
  -9  11   1 67345.3 3273.73   1
  -8 -11   1 28506.0 1904.81   2
  -8  11   1 38913.9 2302.19   1
  -7  11   1 6442.17 863.819   1
  -7 -11   1 6397.46 847.803   2
  -6 -11   1 5401.23 716.443   2
  -6  11   1 6758.95 860.933   1
  -5 -11   1 93919.0 3225.24   2
  -5  11   1 99135.0 3511.74   1
  -4 -11   1 204847. 5311.72   2
  -4  11   1 209848. 5659.60   1
  -3  11   1 167003. 4696.23   1
  -3 -11   1 170510. 4370.54   2
  -2 -11   1 105845. 3148.53   2
   2 -11  -1 106041. 3482.40   2
   2  11  -1 105446. 3211.74   2
   1 -11  -1 11334.9 956.573   2
  -1 -11   1 10643.3 833.240   2
   1  11  -1 10413.6 824.506   2
   0 -11  -1 609.946 326.744   2
   0  11  -1 274.300 175.788   2
   0 -11   1 432.626 271.604   2
   1 -11   1 51801.9 2039.70   2
  -1 -11  -1 52237.4 2183.10   2
  -1  11  -1 54159.2 2031.02   2
  -2  11  -1 103719. 3165.44   2
  -2 -11  -1 102019. 3390.54   2
  -2  11  -1 109508. 3298.14   1
  -3  11  -1 155239. 4286.71   1
  -3 -11  -1 150702. 4459.51   2
  -4  11  -1 109095. 3470.32   1
  -4 -11  -1 107462. 3630.87   2
  -5  11  -1 22604.1 1442.13   1
  -5 -11  -1 22640.8 1528.98   2
  -6  11  -1 397.687 238.750   1
  -6 -11  -1 145.128 273.269   2
  -7 -11  -1 62673.2 2923.98   2
  -7  11  -1 63085.3 2838.58   1
  -8  11  -1 73555.9 3262.06   1
  -8 -11  -1 68361.1 3237.21   2
  -9  11  -1 57870.2 3016.51   1
  -9 -11  -1 57529.7 3060.79   2
 -10 -11  -1 16818.4 1682.52   2
 -10  11  -1 20224.7 1814.28   1
 -11 -11  -1 495.751 541.256   2
 -11  11  -1-461.814 545.021   1
 -12  11  -1 6283.89 1159.07   1
 -12 -11  -1 6383.06 1158.20   2
 -13  11  -1 22374.6 2195.66   1
 -13 -11  -1 19090.1 2053.76   2
 -14  11  -1 39601.6 3094.80   1
 -14 -11  -1 33971.6 2898.96   2
 -15  11  -1 25218.9 2536.86   1
 -15  12   1 451.615 553.813   1
 -15 -12   1-147.149 378.725   2
 -14 -12   1 9868.75 1500.58   2
 -14  12   1 13089.2 1811.26   1
  14 -12  -1 10650.6 1668.60   4
 -13 -12   1 16866.6 1900.70   2
  13 -12  -1 18690.9 2087.09   4
 -13  12   1 18554.6 2054.29   1
 -12 -12   1 22473.2 2085.47   2
 -12  12   1 27805.5 2401.01   1
 -11  12   1 28149.1 2304.80   1
 -11 -12   1 26414.3 2136.25   2
 -10 -12   1 10505.6 1270.94   2
 -10  12   1 10439.2 1339.35   1
  -9  12   1 2351.86 617.456   1
  -9 -12   1 1801.58 550.076   2
  -8  12   1 7540.84 1086.52   1
  -8 -12   1 7897.99 977.958   2
  -7 -12   1 63804.4 2847.57   2
  -7  12   1 65997.4 3031.59   1
  -6  12   1 32049.1 1973.24   1
  -6 -12   1 32696.8 1840.45   2
  -5 -12   1 17252.7 1258.60   2
  -5  12   1 18882.3 1451.70   1
  -4  12   1 1235.61 399.561   1
  -4 -12   1 819.299 269.888   2
  -3  12   1 11416.2 1037.34   1
  -3 -12   1 13676.1 1029.17   2
   2 -12  -1 112572. 3688.53   2
  -2 -12   1 108965. 3356.58   2
  -1 -12   1 138856. 3953.84   2
   1 -12  -1 141294. 4203.55   2
   0 -12   1 67021.1 2441.89   2
   0 -12  -1 69367.5 2698.96   2
   1 -12   1 95803.6 3110.18   2
  -1 -12  -1 93116.6 3232.74   2
  -2  12  -1 21186.3 1308.46   1
  -2 -12  -1 17821.6 1293.24   2
  -3  12  -1 582.732 283.565   1
  -3 -12  -1 140.768 290.528   2
  -4 -12  -1 49094.2 2322.30   2
  -4  12  -1 50024.3 2239.01   1
  -5  12  -1 81984.6 3102.31   1
  -5 -12  -1 81172.9 3230.43   2
  -6  12  -1 65244.1 2810.00   1
  -6 -12  -1 62697.6 2882.00   2
  -7 -12  -1 38991.2 2280.08   2
  -7  12  -1 40199.8 2241.78   1
  -8  12  -1 7214.00 977.897   1
  -8 -12  -1 7298.29 1044.02   2
  -9 -12  -1 3162.88 729.358   2
  -9  12  -1 4325.28 862.220   1
 -10 -12  -1 23156.0 2032.32   2
 -10  12  -1 22353.8 1944.97   1
 -11  12  -1 33778.4 2510.74   1
 -11 -12  -1 30127.2 2419.93   2
 -12 -12  -1 19846.6 2073.25   2
 -12  12  -1 25957.1 2275.35   1
 -13  12  -1 13343.6 1729.52   1
 -13 -12  -1 14748.1 1807.94   2
 -14  12  -1 483.839 492.492   1
 -14 -12  -1 164.049 472.219   2
 -15  12  -1 5263.21 1201.70   1
 -15 -13   1 9841.55 1561.99   2
 -15  13   1 10945.9 1748.77   1
 -14 -13   1 4701.87 1105.99   2
 -14  13   1 6057.84 1292.12   1
 -13 -13   1-81.7233 409.534   2
 -13  13   1 527.791 663.823   1
 -12  13   1 130.963 457.457   1
 -12 -13   1 175.581 471.020   2
 -11 -13   1 4120.01 869.297   2
 -11  13   1 3916.06 929.556   1
 -10  13   1 20273.1 1885.61   1
 -10 -13   1 17245.4 1653.93   2
  -9  13   1 39174.2 2529.90   1
  -9 -13   1 37635.5 2351.67   2
  -8  13   1 74880.0 3488.93   1
  -8 -13   1 74921.0 3289.57   2
  -7  13   1 20255.9 1643.94   1
  -7 -13   1 19625.3 1539.14   2
  -6 -13   1 375.638 275.979   2
  -6  13   1 543.508 308.681   1
  -5 -13   1 1.01050 259.651   2
  -5  13   1-72.5070 347.005   1
  -4  13   1 9364.14 1011.36   1
  -4 -13   1 9986.60 924.339   2
  -3  13   1 25371.0 1639.44   1
  -3 -13   1 24043.2 1463.02   2
  -2 -13   1 14207.2 1102.28   2
   2 -13  -1 16008.4 1289.25   2
  -1 -13   1 3611.25 543.558   2
   1 -13  -1 5411.67 760.168   2
   0 -13   1 1613.04 354.027   2
   0 -13  -1 1766.96 472.818   2
   1 -13   1 6040.52 710.707   2
  -1 -13  -1 6022.43 764.801   2
  -2  13  -1 49151.0 2180.38   1
  -2 -13  -1 45655.8 2202.95   2
  -3 -13  -1 24996.6 1637.83   2
  -3  13  -1 25974.4 1563.88   1
  -4 -13  -1 5423.79 791.905   2
  -4  13  -1 5024.09 690.207   1
  -5 -13  -1 9020.33 1037.73   2
  -5  13  -1 9752.11 1018.94   1
  -6  13  -1 32069.6 1956.11   1
  -6 -13  -1 35201.3 2120.33   2
  -7 -13  -1 37317.1 2290.18   2
  -7  13  -1 36566.0 2208.05   1
  -8  13  -1 23879.6 1842.89   1
  -8 -13  -1 23157.0 1855.38   2
  -9 -13  -1 15961.0 1649.74   2
  -9  13  -1 18030.3 1690.27   1
 -10  13  -1 9506.47 1291.58   1
 -10 -13  -1 8083.67 1221.68   2
 -11  13  -1 250.533 472.724   1
 -11 -13  -1 78.5141 413.847   2
 -12  13  -1 98.2939 390.819   1
 -12 -13  -1-367.737 539.750   2
 -13 -13  -1 2452.46 865.322   2
 -13  13  -1 2225.18 798.982   1
 -14  13  -1 14369.2 1878.06   1
 -14 -13  -1 8131.99 1478.25   2
 -15  13  -1 5943.57 1297.57   1
 -14 -14   1-119.124 437.812   2
 -14  14   1 232.879 612.881   1
 -13  14   1 1385.12 768.162   1
 -13 -14   1 427.496 443.851   2
 -12 -14   1 805.298 353.962   2
 -12  14   1 1662.25 722.646   1
 -11  14   1 380.626 446.231   1
 -11 -14   1 524.702 501.334   2
 -10  14   1 724.617 393.669   1
 -10 -14   1-5.20715 371.201   2
  -9 -14   1-414.278 464.417   2
  -9  14   1-96.6892 400.433   1
  -8 -14   1 519.903 397.626   2
  -8  14   1 668.329 423.349   1
  -7 -14   1 889.481 455.904   2
  -7  14   1 582.459 365.662   1
  -6 -14   1 1717.99 473.746   2
  -6  14   1 2863.84 627.284   1
  -5  14   1 4683.09 747.147   1
  -5 -14   1 3993.52 637.538   2
  -4  14   1 3709.44 650.940   1
  -4 -14   1 2449.36 525.567   2
  -3  14   1 6162.54 830.251   1
  -3 -14   1 5965.61 745.556   2
   2 -14  -1 11488.5 1108.51   2
  -2 -14   1 10022.7 951.888   2
   1 -14  -1 322.711 251.524   2
  -1 -14   1 94.3431 203.127   2
   0 -14  -1 850.090 372.293   2
   0 -14   1 732.796 303.325   2
   1 -14   1 3994.68 613.843   2
  -1 -14  -1 3635.96 670.696   2
  -2  14  -1 4601.93 653.522   1
  -2 -14  -1 4513.63 719.036   2
  -3  14  -1 848.693 275.137   1
  -3 -14  -1 727.828 319.415   2
  -4 -14  -1-128.876 224.569   2
  -4  14  -1 79.0218 259.680   1
  -5 -14  -1 5199.48 830.999   2
  -5  14  -1 3294.94 628.458   1
  -6 -14  -1 9829.10 1134.98   2
  -6  14  -1 8064.90 1009.51   1
  -7  14  -1-42.5415 383.622   1
  -7 -14  -1 329.394 368.052   2
  -8  14  -1 967.183 486.708   1
  -8 -14  -1 168.961 414.131   2
  -9  14  -1-177.697 311.605   1
  -9 -14  -1-215.123 487.727   2
 -10 -14  -1 170.610 339.528   2
 -10  14  -1 159.479 461.079   1
 -11 -14  -1-158.858 525.890   2
 -11  14  -1 42.9002 535.002   1
 -12  14  -1 381.728 390.422   1
 -12 -14  -1-130.868 576.030   2
 -13  14  -1 706.030 647.006   1
 -13 -14  -1 290.961 519.896   2
 -14  14  -1-165.123 458.803   1
 -14  15   1 6846.30 1432.03   1
 -14 -15   1 3592.46 970.452   2
 -13  15   1 2281.55 869.073   1
 -13 -15   1 2053.36 595.720   2
 -12  15   1 579.378 658.452   1
 -12 -15   1-405.862 555.999   2
 -11 -15   1 12504.1 1512.80   2
 -11  15   1 11176.1 1540.60   1
 -10  15   1 20920.3 1975.24   1
 -10 -15   1 18429.4 1765.38   2
  -9 -15   1 13008.3 1437.02   2
  -9  15   1 11447.3 1439.23   1
  -8  15   1 6072.41 987.186   1
  -8 -15   1 5750.32 964.695   2
  -7  15   1 2009.29 553.159   1
  -7 -15   1 1345.22 430.552   2
  -6  15   1-165.331 309.790   1
  -6 -15   1 88.6073 277.989   2
  -5  15   1 1207.83 465.129   1
  -5 -15   1-17.4527 312.944   2
  -4  15   1 4899.22 768.148   1
  -4 -15   1 3672.35 630.136   2
  -3  15   1 20177.0 1566.08   1
  -3 -15   1 20352.1 1423.83   2
  -2 -15   1 39036.6 2010.63   2
   2 -15  -1 40478.1 2222.80   2
  -1 -15   1 10590.7 977.560   2
   1 -15  -1 9604.54 1056.13   2
   0 -15  -1 794.021 349.467   2
   0 -15   1-19.9200 310.838   2
   1 -15   1 10053.7 993.627   2
  -1 -15  -1 7444.56 934.876   2
  -2  15  -1 28007.2 1734.31   1
  -2 -15  -1 27573.9 1810.48   2
  -3  15  -1 20160.4 1489.35   1
  -3 -15  -1 21025.7 1572.16   2
  -4 -15  -1 9282.50 1032.83   2
  -4  15  -1 8055.97 963.291   1
  -5 -15  -1 446.572 343.101   2
  -5  15  -1 813.953 368.616   1
  -6  15  -1-156.027 286.795   1
  -6 -15  -1 699.104 361.476   2
  -7 -15  -1 7593.21 1066.85   2
  -7  15  -1 5430.83 896.021   1
  -8  15  -1 7717.36 1115.35   1
  -8 -15  -1 10351.7 1294.85   2
  -9  15  -1 5306.47 944.529   1
  -9 -15  -1 4995.47 984.834   2
 -10  15  -1 2159.68 712.525   1
 -10 -15  -1 2017.15 686.853   2
 -11 -15  -1-209.032 473.143   2
 -11  15  -1 260.121 495.784   1
 -12 -15  -1 454.237 472.267   2
 -12  15  -1 1219.31 672.464   1
 -13  15  -1 2157.52 819.746   1
 -13 -15  -1 940.556 653.610   2
 -14  15  -1 3541.36 1018.91   1
 -14 -16   1 2052.41 855.976   2
 -13 -16   1 12779.9 1693.39   2
 -13  16   1 14272.7 1888.87   1
 -12  16   1 26489.8 2510.57   1
 -12 -16   1 25870.4 2329.19   2
 -11 -16   1 21641.2 2046.58   2
 -11  16   1 19939.3 2085.75   1
 -10 -16   1 1373.91 580.905   2
 -10  16   1 411.311 451.854   1
  -9 -16   1 3231.45 719.090   2
  -9  16   1 2870.58 766.530   1
  -8  16   1 9961.06 1290.04   1
  -8 -16   1 8490.70 1119.21   2
  -7 -16   1 26756.1 1913.97   2
  -7  16   1 26272.4 2066.15   1
  -6  16   1 34887.1 2314.02   1
  -6 -16   1 34187.6 2090.66   2
  -5  16   1 28444.8 2007.34   1
  -5 -16   1 26811.6 1806.17   2
  -4 -16   1 4516.74 740.186   2
  -4  16   1 7225.35 976.090   1
  -3  16   1 528.771 385.940   1
  -3 -16   1-8.49057 314.884   2
   2 -16  -1 38060.6 2217.06   2
  -2 -16   1 34429.1 1942.82   2
   1 -16  -1 83608.2 3369.42   2
  -1 -16   1 65176.7 2819.43   2
   0 -16   1 60236.7 2658.06   2
   0 -16  -1 55656.7 2709.90   2
  -1 -16  -1 56306.7 2720.40   2
   1 -16   1 52620.9 2508.88   2
  -2  16  -1 1281.22 428.150   1
  -2 -16  -1 623.252 295.645   2
  -3  16  -1 14966.4 1309.67   1
  -3 -16  -1 15145.0 1368.68   2
  -4 -16  -1 32971.9 2099.16   2
  -4  16  -1 32540.5 2027.96   1
  -5  16  -1 42009.0 2359.61   1
  -5 -16  -1 39387.1 2424.87   2
  -6 -16  -1 53118.5 2885.39   2
  -6  16  -1 56516.6 2882.77   1
  -7 -16  -1 19665.9 1713.24   2
  -7  16  -1 17756.8 1614.71   1
  -8  16  -1-8.56835 325.113   1
  -8 -16  -1 622.039 336.608   2
  -9 -16  -1 4097.46 888.044   2
  -9  16  -1 4139.57 864.602   1
 -10  16  -1 22072.4 2071.29   1
 -10 -16  -1 20760.5 2045.71   2
 -11  16  -1 38737.1 2849.69   1
 -11 -16  -1 37766.4 2864.21   2
 -12  16  -1 18805.7 2037.55   1
 -12 -16  -1 17369.7 2004.12   2
 -13  16  -1 5604.02 1196.82   1
 -13 -17   1 7316.89 1337.70   2
 -12 -17   1 2568.93 836.262   2
 -12  17   1 3755.45 1071.75   1
 -11 -17   1 6878.22 1199.29   2
 -11  17   1 4846.27 1040.21   1
 -10  17   1 25264.0 2308.24   1
 -10 -17   1 29742.6 2322.27   2
  -9  17   1 32712.5 2535.56   1
  -9 -17   1 32688.8 2375.94   2
  -8  17   1 31474.1 2375.74   1
  -8 -17   1 26931.0 2074.48   2
  -7  17   1 2754.02 673.745   1
  -7 -17   1 2213.10 575.097   2
  -6 -17   1 5477.01 866.342   2
  -6  17   1 4742.75 896.970   1
  -5 -17   1 14891.4 1352.75   2
  -5  17   1 16687.6 1599.83   1
  -4 -17   1 38613.2 2191.30   2
  -4  17   1 36548.0 2336.79   1
  -3 -17   1 43699.2 2338.05   2
  -3  17   1 45070.2 2579.37   1
   2 -17  -1 36213.6 2210.42   2
  -2 -17   1 30190.0 1886.94   2
  -1 -17   1 1436.38 384.458   2
   1 -17  -1 2228.15 583.679   2
   0 -17  -1 1986.89 529.541   2
   0 -17   1 3223.10 651.362   2
  -1 -17  -1 36637.0 2222.81   2
  -2  17  -1 84560.4 3467.89   1
  -2 -17  -1 85260.4 3610.54   2
  -3  17  -1 74404.7 3225.94   1
  -3 -17  -1 69750.4 3264.01   2
  -4  17  -1 37817.6 2258.54   1
  -4 -17  -1 33471.3 2227.30   2
  -5 -17  -1 3262.67 728.340   2
  -5  17  -1 2539.78 608.921   1
  -6  17  -1 2295.44 641.360   1
  -6 -17  -1 3518.11 693.058   2
  -7 -17  -1 28295.1 2186.47   2
  -7  17  -1 30342.3 2178.43   1
  -8 -17  -1 44176.4 2869.48   2
  -8  17  -1 50381.5 2962.97   1
  -9 -17  -1 36944.0 2700.73   2
  -9  17  -1 34696.7 2540.97   1
 -10 -17  -1 14092.1 1704.89   2
 -10  17  -1 10807.5 1471.79   1
 -11 -17  -1 28.7891 418.071   2
 -11  17  -1-71.8838 426.459   1
 -12 -17  -1 6847.40 1323.63   2
 -12 -18   1 19023.4 2071.24   2
 -12  18   1 22360.0 2393.61   1
 -11 -18   1 19849.1 1994.47   2
 -11  18   1 19473.1 2152.93   1
 -10 -18   1 4852.61 946.593   2
 -10  18   1 4287.86 945.960   1
  -9  18   1 811.463 641.352   1
  -9 -18   1-14.9190 371.198   2
  -8  18   1 16740.2 1787.05   1
  -8 -18   1 18152.5 1742.07   2
  -7  18   1 55386.4 3200.98   1
  -7 -18   1 52560.5 2915.29   2
  -6  18   1 37673.4 2581.91   1
  -6 -18   1 42754.4 2507.65   2
  -5  18   1 31502.8 2287.78   1
  -5 -18   1 29205.4 1995.22   2
  -4 -18   1 14267.2 1362.26   2
  -4  18   1 14182.4 1481.06   1
  -3  18   1 35.4250 345.677   1
  -3 -18   1 301.004 304.228   2
   2 -18  -1 31751.4 2151.68   2
  -2 -18   1 30810.9 1972.26   2
  -1 -18   1 57557.2 2792.87   2
   1 -18  -1 59029.0 3026.42   2
   0 -18   1 30788.5 1959.92   2
   0 -18  -1 22887.7 1821.86   2
  -1 -18  -1 15579.3 1482.77   2
  -2 -18  -1-156.449 353.543   2
  -2  18  -1 70.6699 313.709   1
  -3  18  -1 9597.45 1164.66   1
  -3 -18  -1 7397.98 1044.82   2
  -4  18  -1 41243.9 2436.00   1
  -4 -18  -1 39111.3 2437.76   2
  -5 -18  -1 50385.3 2886.70   2
  -5  18  -1 54309.1 2889.91   1
  -6  18  -1 36358.2 2406.49   1
  -6 -18  -1 40191.7 2603.29   2
  -7  18  -1 24653.0 2026.64   1
  -7 -18  -1 24452.8 2085.58   2
  -8  18  -1 3157.89 710.218   1
  -8 -18  -1 1952.24 593.411   2
  -9 -18  -1 7577.33 1248.92   2
  -9  18  -1 4983.73 1015.00   1
 -10 -18  -1 31199.9 2626.50   2
 -10  18  -1 31775.4 2610.20   1
 -11 -18  -1 34406.6 2812.65   2
 -11 -19   1-166.634 544.848   2
 -11  19   1 1464.30 671.167   1
 -10 -19   1 14594.8 1738.94   2
 -10  19   1 14740.2 1816.68   1
  -9 -19   1 29171.6 2315.80   2
  -9  19   1 27898.6 2459.05   1
  -8  19   1 21294.6 2087.93   1
  -8 -19   1 24409.6 2071.47   2
  -7 -19   1 4494.68 883.186   2
  -7  19   1 3918.76 886.998   1
  -6  19   1 2220.60 698.188   1
  -6 -19   1 2272.14 689.754   2
  -5  19   1 12372.8 1477.97   1
  -5 -19   1 10891.7 1255.56   2
  -4 -19   1 22641.3 1809.66   2
  -4  19   1 23680.7 1994.65   1
  -3 -19   1 30969.5 2053.33   2
  -3  19   1 30750.6 2255.13   1
  -2  19   1 14746.0 1532.27   1
  -2 -19   1 14366.1 1382.24   2
   1 -19  -1 323.901 407.525   2
  -1 -19   1 378.663 337.375   2
   0 -19   1 3799.44 718.316   2
   0 -19  -1 3043.95 609.224   2
  -1 -19  -1 22043.0 1798.70   2
  -2  19  -1 67533.9 3225.19   1
  -2 -19  -1 67206.8 3302.53   2
  -3 -19  -1 70029.9 3453.73   2
  -3  19  -1 65007.6 3229.12   1
  -4 -19  -1 22135.0 1870.85   2
  -4  19  -1 22634.4 1851.60   1
  -5  19  -1 607.530 476.760   1
  -5 -19  -1 639.126 422.674   2
  -6 -19  -1 6572.54 1097.42   2
  -6  19  -1 5996.73 1026.84   1
  -7  19  -1 17446.8 1738.61   1
  -7 -19  -1 16895.0 1760.24   2
  -8  19  -1 14642.2 1648.86   1
  -8 -19  -1 14753.2 1705.78   2
  -9 -19  -1 17094.6 1885.38   2
 -10 -19  -1 9900.51 1527.15   2
 -10  20   1 254.718 456.087   1
  -9  20   1 386.012 392.273   1
  -8 -20   1 6708.86 1120.40   2
  -8  20   1 4560.31 1042.72   1
  -7 -20   1 11795.0 1415.29   2
  -7  20   1 10970.3 1529.48   1
  -6  20   1 13572.0 1597.03   1
  -6 -20   1 12068.3 1406.12   2
  -5 -20   1 10709.4 1257.33   2
  -5  20   1 9161.68 1340.58   1
  -4 -20   1 4075.08 794.761   2
  -4  20   1 3021.75 728.589   1
  -3 -20   1 402.238 289.897   2
  -3  20   1 205.602 445.001   1
  -2  20   1 12257.9 1449.01   1
  -2 -20   1 12515.5 1352.26   2
  -1 -20   1 12672.3 1339.87   2
   1 -20  -1 13285.5 1456.13   2
   0 -20   1 15635.1 1498.57   2
   0 -20  -1 15378.5 1571.20   2
  -1  20  -1 11170.4 1290.71   1
  -1 -20  -1 10723.0 1296.35   2
  -2 -20  -1 4648.29 924.151   2
  -2  20  -1 3373.26 751.083   1
  -3  20  -1 714.732 437.573   1
  -3 -20  -1-107.003 315.990   2
  -4  20  -1 2879.82 639.999   1
  -4 -20  -1 2441.41 726.220   2
  -5 -20  -1 11969.0 1468.93   2
  -5  20  -1 11079.1 1363.78   1
  -6  20  -1 19364.4 1824.30   1
  -6 -20  -1 18536.2 1845.98   2
  -7 -20  -1 9119.31 1349.73   2
  -7  20  -1 7972.16 1215.18   1
  -8 -20  -1 174.029 396.851   2
  -9 -20  -1 979.687 472.579   2
  -8  21   1-88.2003 504.755   1
  -7  21   1-257.719 431.025   1
  -6  21   1 1158.62 571.084   1
  -5  21   1 1647.52 541.297   1
  -4  21   1 536.817 397.017   1
  -4 -21   1 2106.19 602.685   2
  -3 -21   1 367.014 281.843   2
  -3  21   1 469.481 386.841   1
  -2 -21   1-144.679 389.610   2
  -2  21   1 14.5756 392.164   1
  -1 -21   1 96.0688 365.922   2
   1 -21  -1-474.098 515.631   2
   0 -21  -1-541.749 440.727   2
  -1  21  -1-69.1240 300.015   1
  -1 -21  -1-120.422 370.476   2
  -2  21  -1 613.859 393.951   1
  -2 -21  -1 1566.79 486.967   2
  -3  21  -1 2416.40 685.740   1
  -3 -21  -1 3247.01 868.903   2
  -4 -21  -1 5449.83 978.491   2
  -4  21  -1 6661.82 1071.24   1
  -5 -21  -1 4204.25 941.844   2
  -5  21  -1 4576.31 892.852   1
  -6 -21  -1 1250.94 568.485   2
  -7 -21  -1-159.705 592.940   2
  -8 -21  -1 580.492 431.804   2
  -7  22   1 2628.95 801.323   1
  -6  22   1 290.181 360.985   1
  -5  22   1 946.890 532.773   1
  -4  22   1 35.5934 356.797   1
  -3  22   1 151.498 331.452   1
  -2  22   1 1357.54 508.460   1
   0 -22  -1 6740.81 1133.74   2
  -1  22  -1 7855.04 1160.55   1
  -1 -22  -1 8580.18 1300.80   2
  -2 -22  -1-58.2308 407.474   2
  -2  22  -1 787.582 388.702   1
  -3 -22  -1 924.403 509.190   2
  -4 -22  -1 5726.91 1110.30   2
  -5 -22  -1 6711.79 1179.32   2
  -6 -22  -1 8814.73 1374.48   2
  -7 -22  -1 3512.72 918.956   2
  -4  23   1 11703.7 1574.93   1
  -3  23   1 24196.0 2251.90   1
  -2  23   1 15771.1 1816.29   1
  -1  23   1 1965.28 701.709   1
   0 -23  -1 207.708 426.731   2
  -1 -23  -1 7570.29 1218.67   2
  -2 -23  -1 25742.8 2278.07   2
  -3 -23  -1 13773.9 1684.43   2
  -4 -23  -1 896.104 485.288   2
  -5 -23  -1-240.315 487.951   2
   0 -24  -1 27833.8 2415.09   2
  -1 -24  -1 21694.0 2139.09   2
  -2 -24  -1 7632.41 1245.06   2
  17   0  -2 36241.8 3143.67   4
  16   0  -2 9825.18 1598.39   4
 -15   0   2 987.117 683.133   1
 -14   0   2 21542.7 2160.61   1
 -13   0   2 152503. 6017.96   1
 -12   0   2 147267. 5730.26   1
 -11   0   2 118898. 2971.77   3
 -11   0   2 124672. 4945.09   1
 -10   0   2 18314.0 945.220   3
 -10   0   2 18358.6 1688.90   1
  -9   0   2 5862.64 558.053   3
  -9   0   2 5620.61 907.199   1
  -8   0   2 167799. 5357.53   1
  -7   0   2 236433. 6323.33   1
   7   0  -2 218173. 6029.14   1
  -6   0   2 128045. 3996.13   1
   6   0  -2 123671. 3842.63   1
  -5   0   2 167858. 4501.38   1
   5   0  -2 162361. 4361.93   1
  -4   0   2 5742.06 588.681   1
   4   0  -2 5841.99 569.610   1
   3   0  -2 564802. 11249.7   1
  -3   0   2 590067. 11378.0   1
   2   0  -2 574303. 10972.3   1
  -2   0   2 581946. 11014.5   1
   1   0  -2 84068.7 1816.92   2
  -1   0   2 83633.8 1821.70   2
  -1   0   2 82281.8 1859.01   1
   0   0  -2 266809. 5146.78   2
   0   0   2 266956. 5170.48   2
  -1   0  -2 94284.7 2021.15   4
  -1   0  -2 93074.7 2193.53   2
   2   0   2 48182.7 1346.80   4
  -2   0  -2 49777.3 1397.41   4
   3   0   2 30837.4 1143.55   4
   3   0   2 30847.3 1271.47   1
   4   0   2 376519. 8003.29   4
   4   0   2 388573. 7516.28   3
   4   0   2 386846. 8337.67   1
   5   0   2 247374. 5768.75   4
   5   0   2 241411. 6083.15   1
   6   0   2 198407. 5545.13   1
   6   0   2 201483. 5186.61   4
   7   0   2 83536.0 3029.15   4
   8   0   2 14916.4 1258.27   4
   9   0   2 44645.9 2404.81   4
  10   0   2 111948. 4257.69   4
  11   0   2 33159.2 2230.92   4
  12   0   2 47009.7 2845.12   4
  13   0   2 18631.5 1833.01   4
  14   0   2 1392.48 678.834   4
  15   0   2 20000.4 2034.73   4
  16   0   2 29340.2 2583.70   4
  17   0   2 21733.1 2272.93   4
  17   1  -2 24207.8 2569.16   4
  17  -1  -2 20712.1 2372.14   4
  16  -1  -2 34335.7 2962.44   4
 -16   1   2 31512.1 2873.83   1
 -15   1   2 31344.5 2756.04   1
  15  -1  -2 37203.8 2963.69   4
 -14   1   2 30640.8 2596.66   1
  14  -1  -2 34409.6 2754.41   4
 -13   1   2 19585.9 2011.69   1
 -13  -1   2 21907.7 2141.61   1
 -12  -1   2 10478.9 1444.36   1
 -12   1   2 8203.68 552.997   3
 -12   1   2 9743.26 1408.72   1
 -11  -1   2 68638.9 3509.32   1
 -11   1   2 64858.1 2058.33   3
 -11   1   2 65623.5 3445.21   1
 -10  -1   2 119145. 4668.61   1
 -10   1   2 116226. 4650.49   1
  -9  -1   2 253451. 7367.80   1
  -9   1   2 260301. 7396.45   1
  -9  -1   2 255889. 5633.17   3
  -8  -1   2 87614.4 2562.95   3
  -8  -1   2 89822.7 3618.22   1
  -8   1   2 88461.5 3536.03   1
  -7   1   2 17193.0 1354.54   1
   7  -1  -2 14499.0 1195.67   1
   7   1  -2 14469.0 1231.25   1
  -7  -1   2 14067.8 1260.94   1
  -7  -1   2 16887.7 935.777   3
  -6   1   2 12541.2 1060.64   1
  -6  -1   2 11384.3 1042.45   1
  -6  -1   2 10819.4 770.197   3
   6   1  -2 9704.84 930.415   1
   6  -1  -2 10799.6 927.579   1
   5  -1  -2 29268.7 1443.75   1
  -5   1   2 28676.8 1507.41   1
   5   1  -2 30084.3 1508.12   1
  -5  -1   2 31422.8 1597.04   1
  -5  -1   2 28321.1 1307.52   3
   4   1  -2 61061.3 2080.34   1
  -4   1   2 60934.7 2102.91   1
   4  -1  -2 62750.1 2057.79   1
  -4  -1   2 59195.8 2134.57   1
   3   1  -2 287043. 6149.44   1
   3  -1  -2 290172. 6116.58   1
  -3   1   2 297706. 6167.82   1
  -3  -1   2 284251. 6238.39   1
   2  -1  -2 223252. 4647.15   1
   2   1  -2 214250. 4582.14   1
  -2   1   2 220060. 4568.41   2
  -2   1   2 229241. 4672.22   1
  -2  -1   2 227636. 4708.39   1
  -1  -1   2 115255. 2380.71   1
   1   1  -2 113477. 2333.31   1
  -1   1   2 111430. 2496.89   2
   1  -1  -2 115059. 2512.35   2
   0  -1  -2 31049.3 945.986   2
   0   1   2 30066.8 944.108   2
   0  -1   2 30743.2 1221.91   3
   0   1  -2 28860.9 749.982   2
   1   1   2 69775.9 1835.65   2
  -1  -1  -2 67026.9 1796.10   2
   1  -1   2 70436.5 2005.62   3
   2  -1   2 646495. 12745.9   3
   2  -1   2 686776. 12630.1   4
  -2  -1  -2 623921. 12773.6   2
   2   1   2 669131. 12409.7   4
   2  -1   2 664613. 12670.4   1
  -2   1  -2 692838. 12633.4   4
   3  -1   2 183931. 4394.95   1
   3  -1   2 189838. 4037.70   3
  -3   1  -2 182620. 4249.99   4
   3   1   2 184640. 4108.40   4
   3  -1   2 188234. 4201.74   4
   4  -1   2 51101.6 1990.23   1
   4   1   2 55347.0 2030.46   1
   4  -1   2 54472.8 1846.12   4
   4   1   2 53454.9 1809.06   4
   5   1   2 5243.75 600.166   4
   5  -1   2 4730.47 551.361   4
   5   1   2 4866.46 638.149   1
   5  -1   2 5323.23 652.546   1
   6   1   2 52095.6 2148.09   4
   6  -1   2 55226.0 2422.29   1
   6  -1   2 54727.2 2198.80   4
   6   1   2 57457.9 2478.23   1
   7  -1   2 67400.2 2887.89   1
   7   1   2 64679.4 2603.01   4
   7  -1   2 66892.3 2655.12   4
   8   1   2 180153. 5263.93   4
   8  -1   2 174099. 5235.84   4
   9  -1   2 96528.8 3773.48   4
   9   1   2 105053. 3877.83   4
  10  -1   2 10660.7 1196.82   4
  10   1   2 12521.5 1284.85   4
  11   1   2 6709.14 1003.73   4
  11  -1   2 4940.42 879.330   4
  12   1   2 22797.8 1938.49   4
  12  -1   2 21602.8 1905.46   4
  13   1   2 40044.5 2665.49   4
  13  -1   2 35870.4 2553.99   4
  14  -1   2 43791.3 2965.84   4
  14   1   2 42040.5 2893.62   4
  15  -1   2 17552.0 1947.58   4
  15   1   2 21045.3 2103.90   4
  16   1   2 2118.88 895.563   4
  16  -1   2 2034.17 746.101   4
  17   1   2 2582.73 905.801   4
  17  -1   2 1909.47 693.007   4
 -17   2   2 4385.07 1091.94   1
  17  -2  -2 4316.40 1196.41   4
 -16   2   2 310.404 562.038   1
  16  -2  -2 651.738 691.782   4
 -15   2   2 9124.27 1472.76   1
  15  -2  -2 8042.32 1369.18   4
 -14   2   2 19041.0 2054.70   1
  14  -2  -2 19371.9 2050.18   4
  13  -2  -2 39732.3 2887.80   4
 -13   2   2 39755.8 2882.14   1
 -12   2   2 50643.9 3129.60   1
 -12  -2   2 48777.6 3068.57   1
  12  -2  -2 47295.5 3046.66   4
 -12   2   2 47180.7 1713.00   3
 -11   2   2 32314.8 2378.07   1
 -11  -2   2 30715.6 2267.76   1
 -10   2   2 9201.74 1196.78   1
 -10  -2   2 8617.51 1137.12   1
  -9  -2   2 2270.79 594.111   1
  -9   2   2 3153.66 649.449   1
  -8   2   2 14976.8 1353.24   1
  -8  -2   2 14029.7 1317.19   1
  -7  -2   2 128468. 4256.10   1
  -7  -2   2 126515. 3303.50   3
   7   2  -2 121829. 4108.37   1
  -7   2   2 137042. 4266.31   1
   6   2  -2 64210.7 2548.48   1
   6  -2  -2 63630.7 2479.53   1
  -6   2   2 66450.1 2582.43   1
  -6  -2   2 62961.6 2616.29   1
  -6  -2   2 65185.0 2084.97   3
   5   2  -2 2255.93 421.624   1
  -5  -2   2 1885.33 323.551   3
   5  -2  -2 1926.33 363.457   1
  -5   2   2 2171.23 483.136   1
  -5  -2   2 1930.27 418.257   1
   4   2  -2 4161.45 506.452   1
  -4  -2   2 3270.83 422.800   3
  -4   2   2 3292.18 458.187   1
  -4  -2   2 2803.08 457.624   1
   4  -2  -2 3694.03 456.823   1
   3   2  -2 16992.2 895.232   1
   3  -2  -2 18466.9 898.183   1
  -3  -2   2 18446.5 964.032   3
  -3  -2   2 17319.6 927.260   1
  -3   2   2 18626.3 920.413   1
   2   2  -2 51009.1 1509.62   1
  -2   2   2 56792.2 1619.54   1
   2   2  -2 55914.4 1822.23   3
  -2   2   2 54948.2 1560.46   2
   2  -2  -2 51468.8 1540.77   2
   2  -2  -2 53970.1 1596.87   1
  -2  -2   2 52749.7 1553.55   1
  -2  -2   2 54785.0 1808.27   3
  -1  -2   2 105415. 2228.37   1
   1  -2  -2 106567. 2493.63   2
   1   2  -2 103757. 2791.28   3
  -1   2   2 111633. 2507.99   2
   1   2  -2 103135. 2207.29   1
  -1  -2   2 103933. 2783.27   3
   0   2   2 25232.0 916.331   2
   0   2  -2 24649.2 1087.17   3
   0  -2  -2 24870.7 909.925   2
   0  -2   2 24311.2 1071.94   3
  -1   2  -2 2388.41 336.341   3
   1   2   2 2296.10 289.570   2
   1  -2   2 2062.27 291.923   3
  -1  -2  -2 1959.22 260.996   2
   2  -2   2 14603.5 694.565   1
  -2   2  -2 15372.4 801.602   3
  -2   2  -2 15112.1 664.957   1
  -2   2  -2 14606.2 742.400   4
  -2  -2  -2 14765.5 796.040   2
   3  -2   2 114287. 3052.04   1
  -3   2  -2 117463. 2950.30   3
  -3  -2  -2 121062. 3205.34   2
  -3   2  -2 121282. 3056.80   4
  -3   2  -2 115676. 2964.42   1
   3  -2   2 119694. 3024.67   4
   4  -2   2 64742.2 2138.78   4
  -4   2  -2 64229.2 2158.79   1
  -4   2  -2 65707.1 1933.33   3
  -4   2  -2 65956.9 2194.21   4
   4  -2   2 68399.1 2294.98   1
   5  -2   2 66429.9 2573.09   1
   5   2   2 83383.0 2799.63   1
  -5   2  -2 76476.9 2131.89   3
  -5   2  -2 74050.3 2550.26   1
   5  -2   2 75072.4 2521.62   4
   6  -2   2 93436.9 3297.34   1
   6   2   2 96013.9 3349.30   1
  -6   2  -2 93392.3 3173.25   1
   6  -2   2 90703.2 3057.21   4
  -7   2  -2 51131.2 2331.83   1
   7  -2   2 50445.8 2437.19   1
   7  -2   2 49112.5 2267.75   4
   8  -2   2 9884.88 1022.38   4
  -8   2  -2 8816.70 1016.74   1
   9  -2   2 616.491 327.069   4
  -9   2  -2 538.107 296.585   1
  10  -2   2 26158.8 1926.42   4
  10   2   2 33292.2 2106.50   4
  11  -2   2 16284.3 1541.52   4
  11   2   2 16990.8 1578.35   4
  12   2   2 451.929 526.461   4
  12  -2   2 665.842 404.704   4
  13  -2   2-348.412 460.411   4
  13   2   2 132.208 442.193   4
  14  -2   2-260.722 534.497   4
  14   2   2 277.138 497.662   4
  15  -2   2 5445.07 1088.22   4
  15   2   2 3268.35 877.927   4
  16  -2   2 10454.2 1552.33   4
  16   2   2 11786.4 1607.03   4
  17  -2   2 8991.55 1458.13   4
  17   2   2 9895.83 1556.15   4
 -17   3   2 1165.47 555.181   1
  17  -3  -2 836.417 611.200   4
  16  -3  -2 202.930 566.091   4
 -16   3   2-804.349 683.272   1
 -15   3   2 422.369 410.105   1
  15  -3  -2-435.936 629.405   4
 -14   3   2 1604.31 648.475   1
  14  -3  -2 1135.43 685.078   4
  13  -3  -2 1383.29 593.979   4
 -13   3   2 757.237 514.873   1
 -12   3   2-303.422 474.404   1
  12  -3  -2 270.511 472.570   4
 -11   3   2 2272.06 698.618   1
  11  -3  -2 2995.94 796.454   4
 -10   3   2 594.233 446.036   1
  10  -3  -2 1514.21 624.994   4
   9  -3  -2 6385.62 1031.25   4
  -9   3   2 4825.86 841.846   1
  -8   3   2 4439.60 754.889   1
  -8  -3   2 3170.74 672.647   1
  -7   3   2 10865.0 1045.52   1
  -7  -3   2 8478.10 945.285   1
   6  -3  -2 735.209 288.372   1
   6   3  -2 368.284 213.847   1
  -6   3   2 909.857 367.545   1
  -6  -3   2-76.0369 339.667   1
   5   3  -2 946.826 317.206   1
  -5   3   2 937.271 303.308   1
  -5  -3   2 1288.94 401.308   1
   5  -3  -2 1624.78 351.756   1
   4   3  -2 5809.59 559.925   3
   4   3  -2 5097.33 559.665   1
  -4  -3   2 5247.73 573.871   1
   4  -3  -2 5769.72 651.790   4
  -4   3   2 4923.28 518.096   1
   4  -3  -2 5581.08 570.093   1
   3  -3  -2 45036.9 1578.43   1
  -3   3   2 42072.4 1518.10   2
   3   3  -2 45909.4 1675.05   3
  -3   3   2 46230.3 1609.57   1
   3   3  -2 45111.1 1598.13   1
   3  -3  -2 46704.0 1655.13   4
   2   3  -2 6083.52 553.060   3
  -2   3   2 7405.03 508.646   2
   2   3  -2 6197.60 440.693   1
  -2   3   2 5672.89 471.254   1
   2  -3  -2 6382.43 498.236   2
   2  -3  -2 6807.53 487.527   4
  -1   3   2 51119.1 1353.67   4
   1  -3  -2 52389.8 1562.16   2
   1  -3  -2 50398.5 1302.65   4
   1   3  -2 51261.0 1751.79   3
  -1   3   2 50247.3 1532.73   2
   0   3  -2 28749.0 1209.02   3
   0  -3  -2 27324.3 1061.44   2
   0   3   2 30186.2 1103.81   2
  -1   3  -2 77909.8 1718.14   1
  -1  -3  -2 78692.9 2143.78   2
   1  -3   2 78107.7 1651.43   1
   1   3   2 82588.4 2227.65   2
  -1   3  -2 74376.8 2241.46   3
  -2   3  -2 9026.39 518.798   1
   2   3   2 8179.94 617.693   2
   2  -3   2 9765.96 499.351   1
  -2   3  -2 8910.99 620.649   3
  -2  -3  -2 8759.19 635.883   2
  -2   3  -2 8700.69 626.683   4
  -3   3  -2 9920.66 675.020   1
  -3  -3  -2 9514.99 718.075   2
   3  -3   2 8950.37 620.199   1
  -3   3  -2 9338.12 641.607   3
  -3   3  -2 10103.4 708.995   4
  -4   3  -2 6162.79 597.570   1
  -4  -3  -2 6827.15 668.418   2
   4  -3   2 7414.48 653.678   1
  -4   3  -2 6901.72 657.436   4
   4  -3   2 6150.50 591.977   4
  -4   3  -2 6496.36 537.063   3
  -5   3  -2 7228.36 556.844   3
  -5   3  -2 6948.70 701.876   1
   5  -3   2 7041.93 719.021   1
   5  -3   2 6471.16 664.215   4
  -5   3  -2 6765.88 709.948   4
  -6   3  -2 17377.7 1208.91   1
  -6   3  -2 16761.6 877.253   3
   6  -3   2 14959.3 1186.60   1
   6  -3   2 16709.7 1170.42   4
   7  -3   2 37349.6 2046.18   1
  -7   3  -2 36482.2 1944.74   1
  -7   3  -2 37163.4 1380.70   3
   7  -3   2 35421.6 1896.63   4
   8  -3   2 3068.84 589.617   4
  -8   3  -2 3766.42 668.616   1
   9  -3   2 12633.1 1238.17   4
  -9   3  -2 14308.9 1333.71   1
 -10   3  -2 9499.87 1140.29   1
  10  -3   2 9548.89 1146.60   4
  11  -3   2 7184.08 1053.44   4
 -11   3  -2 6755.48 1019.76   1
  12  -3   2-152.619 419.733   4
  12   3   2-359.035 444.425   4
  13   3   2 9273.67 1342.53   4
  13  -3   2 7861.24 1198.13   4
  14   3   2 6924.43 1213.41   4
  14  -3   2 5749.36 1060.59   4
  15   3   2 3330.52 881.697   4
  15  -3   2 4728.19 987.070   4
  16  -3   2 308.704 429.136   4
  16   3   2 611.640 482.806   4
  17   3   2-207.883 425.631   4
 -17   4   2 472.192 498.871   1
  17  -4  -2 2488.17 1010.17   4
  16  -4  -2-181.688 435.369   4
 -16   4   2 438.128 769.164   1
 -15   4   2 1001.41 738.928   1
  15  -4  -2 692.728 638.004   4
 -14   4   2 324.899 400.346   1
  14  -4  -2 460.891 456.337   4
  13  -4  -2 9168.29 1388.49   4
 -13   4   2 9804.47 1428.44   1
 -12   4   2 1704.56 619.858   1
  12  -4  -2 1745.65 646.045   4
  11  -4  -2 561.773 509.711   4
 -11   4   2 89.7689 386.370   1
  10  -4  -2 209.376 472.581   4
 -10   4   2 668.740 540.332   1
  -9   4   2 1695.35 557.451   1
   9  -4  -2 602.889 398.689   4
  -8   4   2 4579.48 744.215   1
   8  -4  -2 3486.26 721.102   4
  -7   4   2 49712.8 2311.63   1
   7  -4  -2 44036.4 2308.89   4
   6  -4  -2 77549.4 2975.63   4
   6   4  -2 81495.2 2564.56   3
  -6   4   2 78624.8 2853.10   1
   6   4  -2 73481.6 2873.35   1
   6  -4  -2 77133.7 2792.50   1
   5   4  -2 46269.3 1977.02   1
   5   4  -2 46224.2 1778.99   3
   5  -4  -2 42628.7 1964.65   4
   5  -4  -2 45266.8 1885.40   1
  -5   4   2 42919.3 1867.82   1
  -4   4   2 68669.5 2330.34   1
   4  -4  -2 75852.5 2392.40   1
   4   4  -2 74192.2 2344.01   3
   4   4  -2 69180.2 2353.13   1
   4  -4  -2 74932.8 2462.15   4
  -4   4   2 69902.6 2291.13   2
  -3   4   2 43389.4 1582.24   2
   3   4  -2 44272.1 1568.34   1
   3  -4  -2 43033.1 1593.22   4
   3   4  -2 44571.9 1679.26   3
  -3   4   2 42555.6 1606.25   1
   2  -4  -2 11605.0 651.078   4
   2   4  -2 12651.1 824.851   3
  -2  -4   2 12219.7 496.146   2
   2  -4  -2 12670.0 752.158   2
  -2   4   2 12761.2 715.748   4
  -2   4   2 13709.8 776.195   2
   1   4  -2 9518.51 718.959   3
  -1   4   2 10371.7 527.043   4
   1   4  -2 10074.6 373.064   2
  -1  -4   2 10157.9 363.009   2
   1  -4  -2 10667.7 664.640   2
  -1   4   2 10516.4 648.815   2
   0  -4  -2 1010.26 234.247   2
   0   4   2 1367.30 248.205   2
   0   4  -2 941.581 119.538   2
  -1  -4  -2 17056.4 871.696   2
   1   4   2 16517.0 872.239   2
  -1   4  -2 16283.8 575.767   1
   2   4   2 6749.13 606.147   2
  -2  -4  -2 6707.62 572.362   2
  -2   4  -2 5339.50 527.211   4
   2  -4   2 5971.34 380.691   1
  -2   4  -2 6209.91 422.134   1
  -3   4  -2 20361.3 967.731   1
  -3  -4  -2 18599.3 1072.21   2
   3  -4   2 21071.3 928.777   1
  -3   4  -2 19111.2 1060.93   4
  -4   4  -2 1006.44 295.517   4
  -4   4  -2 1170.67 306.447   1
  -4  -4  -2 621.888 300.001   2
   4  -4   2 859.479 229.861   1
   4  -4   2 909.043 252.831   4
   5  -4   2 494.112 224.656   1
  -5  -4  -2 91.7950 218.798   2
  -5   4  -2 66.4036 227.257   1
  -5   4  -2 582.238 296.265   4
   5  -4   2-23.2721 275.036   4
   6  -4   2 2141.70 444.917   4
  -6   4  -2 1816.19 451.731   1
  -6   4  -2 1363.65 258.941   3
   6  -4   2 1482.99 381.085   1
  -7   4  -2 2927.82 557.102   1
   7  -4   2 2819.97 516.274   1
  -7   4  -2 3066.34 381.109   3
   7  -4   2 2176.64 481.755   4
  -8   4  -2 6408.83 847.165   1
  -8   4  -2 5922.05 540.280   3
   8  -4   2 5477.97 786.771   4
  -9   4  -2 637.047 222.202   3
   9  -4   2-40.5455 288.464   4
  -9   4  -2 678.412 403.605   1
 -10   4  -2 18691.3 1646.72   1
  10  -4   2 16001.5 1513.08   4
  11  -4   2 1658.65 512.841   4
 -11   4  -2 1958.34 625.457   1
  12  -4   2 427.778 411.887   4
 -12   4  -2 1234.72 523.083   1
  13  -4   2 2599.12 732.799   4
  13   4   2 3871.85 905.944   4
  14   4   2 1781.91 698.822   4
  14  -4   2 1415.54 567.399   4
  15  -4   2 388.159 392.560   4
  15   4   2 1303.01 653.008   4
  16   4   2 1372.14 664.676   4
  16  -4   2 2080.63 698.890   4
  17   4   2 11.5456 420.338   4
  17  -5  -2 10215.7 1700.80   4
 -17   5   2 12179.3 1833.20   1
 -16   5   2 21542.1 2377.08   1
  16  -5  -2 20902.3 2348.58   4
 -15   5   2 18308.3 2164.08   1
  15  -5  -2 19579.7 2198.13   4
  14  -5  -2 12903.8 1724.21   4
 -14   5   2 10646.3 1566.44   1
 -13   5   2 13175.9 1677.21   1
  13  -5  -2 12422.1 1646.86   4
 -12   5   2 604.056 543.203   1
  12  -5  -2 1151.59 499.551   4
 -11   5   2 20248.8 1840.18   1
  11  -5  -2 18880.7 1836.84   4
 -10   5   2 12647.4 1365.61   1
  10  -5  -2 9854.69 1263.28   4
   9  -5  -2 33601.4 2212.07   4
  -9   5   2 39541.6 2312.74   1
  -8   5   2 22651.0 1653.68   1
   8  -5  -2 23487.9 1743.84   4
  -7   5   2-30.1083 244.269   1
   7  -5  -2 403.917 381.067   4
   7   5  -2 407.824 255.799   3
  -6   5   2 18298.1 1278.74   1
   6   5  -2 21857.2 1203.76   3
   6  -5  -2 19009.7 1356.30   4
   6   5  -2 20516.3 1384.48   1
  -5   5   2 16186.4 1100.60   1
   5   5  -2 18739.9 1207.17   1
  -5   5   2 18024.7 1124.72   2
   5  -5  -2 17574.3 1209.46   4
   5   5  -2 17993.3 1077.83   3
   5  -5  -2 16887.6 1096.46   1
   4  -5  -2 120114. 3389.65   4
   4   5  -2 117865. 3364.15   3
   4  -5  -2 112137. 3330.06   1
  -4   5   2 117192. 3326.66   2
   4   5  -2 126070. 3418.48   1
  -4   5   2 118528. 3355.25   1
  -3   5   2 190205. 4635.95   2
  -3   5   2 194490. 4636.13   4
   3  -5  -2 199207. 4623.28   4
  -3   5   2 192812. 4680.61   1
   3   5  -2 201931. 4838.68   3
  -3  -5   2 195292. 4227.87   2
  -2  -5   2 9191.66 451.527   2
   2  -5  -2 8082.17 565.734   4
   2  -5  -2 7840.39 631.547   2
  -2   5   2 8576.66 644.255   2
  -2   5   2 9047.53 613.536   4
  -1   5   2 8482.05 519.318   4
  -1  -5   2 8667.89 394.836   2
   1   5  -2 7526.11 378.519   2
   1  -5  -2 8514.28 631.681   2
  -1   5   2 8242.77 612.803   2
   0   5   2 8008.84 618.536   2
   0   5  -2 7997.88 393.280   2
   0  -5  -2 8309.52 627.741   2
  -1   5  -2 1388.52 187.287   2
   1   5   2 1379.54 271.391   2
  -1   5  -2 2024.99 214.818   1
  -1  -5  -2 1548.66 317.776   2
   2   5   2 120025. 3251.75   2
  -2   5  -2 116403. 2740.58   1
  -2  -5  -2 114332. 3160.63   2
   3  -5   2 85364.1 2255.83   1
  -3   5  -2 80389.7 2308.75   1
  -3   5  -2 83270.9 2633.62   4
   3   5   2 85463.0 2714.63   2
  -3  -5  -2 76459.2 2553.03   2
  -4   5  -2 73920.8 2340.79   1
  -4  -5  -2 71569.0 2529.10   2
  -4   5  -2 69644.3 2471.36   4
   4  -5   2 71031.7 2237.24   1
  -5   5  -2 17882.6 1147.38   1
   5  -5   2 18661.2 1135.76   1
  -5   5  -2 19370.1 1255.45   4
  -5  -5  -2 19186.2 1283.25   2
   5  -5   2 17334.8 1164.73   4
   6  -5   2 13152.9 1050.36   1
  -6  -5  -2 15987.9 1241.52   2
  -6   5  -2 15653.7 1158.56   1
   6  -5   2 13083.0 1088.93   4
   7  -5   2 43597.2 2208.57   4
   7  -5   2 43788.3 2169.65   1
  -7   5  -2 46865.1 2261.09   1
  -7  -5  -2 43805.8 2288.52   2
  -8  -5  -2 25658.2 1860.61   2
  -8   5  -2 27013.1 1798.38   1
   8  -5   2 29525.3 1868.09   4
  -8   5  -2 30087.9 1374.27   3
  -9   5  -2 10995.5 1203.90   1
   9  -5   2 10842.8 1204.65   4
  -9   5  -2 11166.9 791.139   3
  10  -5   2-209.292 442.298   4
 -10   5  -2 330.480 175.437   3
 -10   5  -2 8.43591 316.571   1
  11  -5   2 6678.70 1058.83   4
 -11   5  -2 8930.04 1204.90   1
  12  -5   2 3684.85 793.558   4
 -12   5  -2 2742.22 735.270   1
 -13   5  -2 9643.58 1375.55   1
  13  -5   2 8638.11 1275.08   4
  14   5   2 11877.7 1534.18   4
  14  -5   2 12950.6 1641.09   4
  15   5   2 7689.83 1291.25   4
  15  -5   2 6652.74 1264.20   4
  16   5   2-318.937 434.723   4
  16  -5   2-109.601 418.234   4
  17   5   2-30.7254 443.483   4
 -16   6   2 5611.15 1335.61   1
  16  -6  -2 5936.67 1298.91   4
 -15   6   2 195.623 551.116   1
  15  -6  -2 1117.90 763.716   4
 -14   6   2 8776.11 1414.16   1
  14  -6  -2 7435.01 1310.33   4
  13  -6  -2 57035.0 3554.51   4
 -13   6   2 62343.0 3666.30   1
  12  -6  -2 57908.5 3476.04   4
 -12   6   2 62575.1 3506.29   1
 -11   6   2 40744.9 2653.74   1
  11  -6  -2 36534.8 2580.97   4
  10  -6  -2 4057.46 878.327   4
 -10   6   2 6164.46 1000.11   1
  -9   6   2 21646.1 1695.77   1
   9  -6  -2 17749.9 1628.83   4
   8   6  -2 161837. 4410.91   3
  -8   6   2 158238. 5057.21   1
   8  -6  -2 156688. 5169.52   4
  -7   6   2 236572. 6231.45   1
   7  -6  -2 222034. 6287.94   4
   7   6  -2 228707. 5693.21   3
   6   6  -2 141533. 4333.97   1
   6   6  -2 143171. 3978.50   3
  -6   6   2 142034. 4232.96   1
   6  -6  -2 132048. 4240.57   4
   5   6  -2 74988.3 2530.90   3
   5  -6  -2 68500.6 2537.63   1
   5   6  -2 71297.9 2609.19   1
   5  -6  -2 68277.1 2575.25   4
  -5   6   2 69054.5 2517.88   2
  -5   6   2 67632.4 2530.26   1
  -5  -6   2 69392.6 2329.14   2
  -4   6   2 20032.8 1167.43   2
   4  -6  -2 19395.7 1151.51   4
  -4   6   2 20940.2 1220.87   1
  -4   6   2 21560.7 1222.46   4
  -4  -6   2 21389.9 1023.87   2
   3  -6  -2 45036.7 1692.67   4
  -3   6   2 47138.6 1801.84   1
  -3  -6   2 43861.5 1429.19   2
  -3   6   2 43722.8 1736.27   2
   3  -6  -2 47001.6 1812.86   2
  -3   6   2 45011.3 1732.75   4
  -2   6   2 90320.2 2510.26   4
  -2  -6   2 87855.9 2159.20   2
   2   6  -2 88424.5 2199.50   2
   2  -6  -2 90356.6 2660.46   2
  -2   6   2 88503.9 2627.25   2
  -1   6   2 54910.6 1684.27   4
   1   6  -2 55278.7 1461.95   2
  -1  -6   2 55946.4 1462.53   2
   1  -6  -2 54725.5 1924.72   2
  -1   6   2 51896.6 1867.61   2
   0  -6   2 78541.9 1995.30   2
   0   6   2 85658.0 2531.43   2
   0  -6  -2 81719.4 2514.81   2
   0   6  -2 84125.4 1995.10   2
  -1  -6  -2 169151. 4213.34   2
   1   6   2 173301. 4261.85   2
  -1   6  -2 163794. 3670.54   2
  -1   6  -2 174717. 3691.85   1
  -2   6  -2 24117.3 1048.70   2
  -2   6  -2 25058.6 981.524   1
   2   6   2 23430.1 1245.25   2
  -2  -6  -2 24891.4 1245.98   2
  -3  -6  -2 63622.9 2292.84   2
   3   6   2 64779.0 2345.29   2
  -3   6  -2 63568.9 1973.38   1
   3  -6   2 64048.5 1913.81   1
  -3   6  -2 65037.1 2344.77   4
  -4   6  -2 88586.3 2693.92   1
   4  -6   2 90085.4 2611.17   1
  -4   6  -2 91932.2 2999.27   4
  -4  -6  -2 87394.7 2964.99   2
  -5  -6  -2 142951. 4229.05   2
   5  -6   2 139369. 3830.64   1
  -5   6  -2 140217. 3953.76   1
  -6   6  -2 111804. 3568.03   1
   6  -6   2 110146. 3674.98   4
  -6  -6  -2 105418. 3675.38   2
   6  -6   2 106100. 3406.15   1
   7  -6   2 47575.4 2362.02   4
  -7  -6  -2 49954.8 2465.71   2
  -7   6  -2 48894.3 2348.41   1
  -8   6  -2 3913.47 696.850   1
  -8  -6  -2 4277.08 787.199   2
   8  -6   2 2996.91 681.856   4
  -9   6  -2 58586.0 2179.98   3
   9  -6   2 55163.7 2848.42   4
  -9  -6  -2 57929.2 3003.33   2
  -9   6  -2 60255.4 2951.90   1
  10  -6   2 82703.4 3762.69   4
 -10  -6  -2 84896.0 3892.80   2
 -10   6  -2 89454.0 3864.32   1
  11  -6   2 53170.0 3064.29   4
 -11  -6  -2 56901.1 3264.22   2
 -11   6  -2 62230.3 3242.02   1
  12  -6   2 30801.5 2400.69   4
 -12  -6  -2 28779.6 2405.61   2
 -12   6  -2 31672.9 2392.70   1
  13  -6   2 14064.7 1670.38   4
 -13   6  -2 13850.4 1640.79   1
 -13  -6  -2 14558.7 1802.08   2
  14  -6   2 93.7580 461.382   4
 -14  -6  -2 502.948 582.779   2
 -14   6  -2 983.636 532.308   1
  15  -6   2 11185.2 1596.12   4
  15   6   2 12492.0 1606.35   4
 -15  -6  -2 9254.04 1494.73   2
  16   6   2 24949.3 2346.67   4
  16  -6   2 24645.7 2493.07   4
  17   6   2 21563.3 2244.75   4
  16  -7  -2 36373.1 3124.88   4
 -16   7   2 39398.2 3258.72   1
 -15   7   2 40134.7 3193.49   1
  15  -7  -2 35458.2 3003.86   4
  14  -7  -2 33763.2 2822.63   4
 -14   7   2 34722.8 2829.97   1
  13  -7  -2 6127.83 1150.15   4
 -13   7   2 7444.00 1298.19   1
  12  -7  -2 9074.53 1328.85   4
 -12   7   2 10925.4 1436.47   1
 -11   7   2 41309.2 2675.07   1
  11  -7  -2 38464.0 2642.54   4
 -10   7   2 110797. 4398.53   1
  10  -7  -2 100389. 4332.14   4
   9   7  -2 136276. 4061.72   3
   9  -7  -2 126997. 4808.85   4
  -9   7   2 137054. 4828.37   1
  -8   7   2 53356.2 2648.32   1
   8  -7  -2 53088.5 2719.66   4
   8   7  -2 55336.1 2287.44   3
  -7  -7   2 707.539 299.503   2
  -7   7   2 801.341 304.784   1
   7   7  -2 699.983 266.140   3
   7  -7  -2 854.088 398.342   4
   6  -7  -2 44913.7 2178.69   4
   6   7  -2 49947.6 2098.54   3
  -6  -7   2 46192.8 1989.15   2
  -6   7   2 47229.5 2176.70   1
  -5   7   2 177061. 4744.44   1
  -5   7   2 171627. 4771.22   4
  -5  -7   2 171500. 4372.50   2
   5  -7  -2 166534. 4733.37   4
  -4   7   2 180507. 4793.32   4
   4  -7  -2 184251. 4744.50   4
  -4  -7   2 182042. 4336.85   2
  -4   7   2 180211. 4722.45   2
  -4   7   2 188247. 4834.33   1
  -3  -7   2 147747. 3506.74   2
   3  -7  -2 152525. 4067.62   2
  -3   7   2 151927. 4051.14   1
  -3   7   2 148457. 3932.92   4
  -3   7   2 148512. 4033.25   2
  -2  -7   2 79064.8 2094.46   2
   2   7  -2 81280.1 2162.58   2
  -2   7   2 83061.5 2595.24   2
  -2   7   2 80085.3 2422.10   4
   2  -7  -2 84903.2 2631.22   2
  -1   7   2 2452.09 375.183   2
   1  -7  -2 1875.98 355.329   2
  -1   7   2 1846.20 296.607   4
  -1  -7   2 1840.20 251.085   2
   1   7  -2 1677.69 238.960   2
   0   7   2 74312.5 2431.94   2
   0  -7   2 74487.5 1985.35   2
   0   7  -2 75684.5 1969.63   2
   0  -7  -2 72130.9 2420.14   2
  -1  -7  -2 274802. 6228.70   2
   1   7   2 282693. 6283.63   2
  -1   7  -2 261413. 5628.80   2
  -2   7  -2 339046. 7196.23   2
  -2  -7  -2 345598. 7716.38   2
  -2   7  -2 356108. 7169.58   1
   2   7   2 354430. 7837.09   2
  -3  -7  -2 327665. 7598.48   2
  -3   7  -2 335415. 7731.81   4
   3   7   2 340204. 7755.30   2
  -3   7  -2 341343. 7146.91   1
   4  -7   2 82390.0 2490.90   1
  -4   7  -2 79726.4 2545.73   1
  -4  -7  -2 83436.2 2894.25   2
  -5  -7  -2 844.292 403.260   2
   5  -7   2 485.553 153.626   1
  -5   7  -2 281.423 228.430   1
  -6   7  -2 47494.0 2154.21   1
  -6  -7  -2 50010.3 2372.31   2
   6  -7   2 49771.1 2108.15   1
  -7   7  -2 153999. 4734.73   1
  -7  -7  -2 152991. 4896.01   2
  -8  -7  -2 182890. 5802.98   2
   8  -7   2 187198. 5753.92   4
  -8   7  -2 186485. 5615.98   1
   9  -7   2 111245. 4389.23   4
  -9  -7  -2 116933. 4531.15   2
  -9   7  -2 120909. 4456.11   1
 -10  -7  -2 12464.8 1405.85   2
 -10   7  -2 12817.9 1417.44   1
  10  -7   2 12151.6 1381.98   4
 -11   7  -2 4814.07 931.391   1
  11  -7   2 5643.01 1008.83   4
 -11  -7  -2 4110.46 899.385   2
  12  -7   2 17017.7 1779.21   4
 -12  -7  -2 16150.5 1827.69   2
 -12   7  -2 19687.2 1872.04   1
 -13  -7  -2 35048.5 2738.03   2
 -13   7  -2 35119.7 2643.54   1
  13  -7   2 31198.1 2539.61   4
 -14   7  -2 44667.7 3106.56   1
  14  -7   2 47703.2 3285.44   4
 -14  -7  -2 45676.2 3301.45   2
  15  -7   2 23212.8 2362.23   4
 -15  -7  -2 26018.7 2553.03   2
 -15   7  -2 29417.4 2579.85   1
  16   7   2 3187.39 918.700   4
  16  -8  -2 1104.32 649.549   4
 -16   8   2 1683.43 870.196   1
 -15   8   2 757.078 662.631   1
  15  -8  -2 1434.50 755.024   4
  14  -8  -2 12158.0 1640.13   4
 -14   8   2 10861.8 1603.08   1
 -13   8   2 23346.3 2235.02   1
  13  -8  -2 24420.4 2299.07   4
  12  -8  -2 50144.3 3221.09   4
 -12   8   2 53664.9 3297.31   1
 -11   8   2 29465.0 2273.28   1
  11  -8  -2 27872.4 2277.82   4
  10   8  -2 2484.96 493.001   3
  10  -8  -2 1741.38 561.405   4
   9  -8  -2 4874.45 870.033   4
  -9   8   2 3929.20 797.165   1
   9   8  -2 5455.79 713.141   3
  -9  -8   2 4321.15 750.151   2
  -8   8   2 54717.9 2664.77   1
   8  -8  -2 51559.5 2704.22   4
   8   8  -2 56021.1 2383.94   3
  -8  -8   2 54245.3 2527.74   2
   7   8  -2 109604. 3555.99   3
   7  -8  -2 104078. 3866.24   4
  -7   8   2 105010. 3775.82   1
  -7  -8   2 102655. 3522.17   2
   6  -8  -2 83732.9 3195.93   4
   6   8  -2 89467.8 3105.68   3
  -6   8   2 85692.2 3178.35   1
  -6  -8   2 84547.2 2885.54   2
   5  -8  -2 54745.4 2353.07   4
  -5  -8   2 55154.9 2077.75   2
  -4   8   2 3219.09 533.011   4
  -4  -8   2 2732.44 386.175   2
  -4   8   2 3027.47 479.894   1
  -3  -8   2 40144.0 1478.23   2
  -3   8   2 42449.2 1790.75   4
  -3   8   2 44282.3 1888.83   1
   3  -8  -2 42669.7 1864.88   2
  -3   8   2 39732.6 1787.90   2
  -2   8   2 191217. 4738.48   4
   2   8  -2 201533. 4427.00   2
   2  -8  -2 196892. 4943.54   2
  -2   8   2 190316. 4874.74   2
  -2  -8   2 190879. 4325.95   2
  -1   8   2 321539. 6678.41   2
   1   8  -2 322746. 5986.68   2
  -1   8   2 308947. 6324.53   4
   0   8  -2 201794. 4503.81   2
   0   8   2 212699. 5172.01   2
   0  -8   2 206343. 4553.29   2
   0  -8  -2 207665. 5107.08   2
  -1   8  -2 39132.6 1389.82   2
   1   8   2 43418.1 1815.90   2
  -1  -8  -2 38743.7 1722.20   2
  -2   8  -2 42.7237 117.382   2
  -2   8  -2 221.922 157.154   1
   2   8   2 97.7734 182.942   2
  -3  -8  -2 24028.8 1394.27   2
  -3   8  -2 23406.8 1211.84   2
  -3   8  -2 25069.8 1180.53   1
  -4  -8  -2 162493. 4589.19   2
  -4   8  -2 161652. 4206.17   1
  -5  -8  -2 220157. 5912.64   2
   5  -8   2 219499. 5430.76   1
  -5   8  -2 224175. 5595.58   1
  -6  -8  -2 117901. 4082.19   2
   6  -8   2 122261. 3706.69   1
  -6   8  -2 123203. 3884.78   1
  -7   8  -2 37293.7 2020.56   1
  -7  -8  -2 33879.4 2066.46   2
  -8  -8  -2 1974.30 563.336   2
  -8   8  -2 1232.69 480.883   1
  -9   8  -2 40408.8 2416.81   1
  -9  -8  -2 35512.2 2336.69   2
  10  -8   2 83856.1 3862.62   4
 -10  -8  -2 80825.8 3840.30   2
 -10   8  -2 83406.6 3773.38   1
 -11   8  -2 88236.0 4050.77   1
 -11  -8  -2 84590.8 4081.79   2
  11  -8   2 82519.4 4031.98   4
  12  -8   2 54212.6 3296.27   4
 -12   8  -2 52806.2 3169.08   1
 -12  -8  -2 52824.6 3330.19   2
  13  -8   2 7625.98 1280.28   4
 -13  -8  -2 12182.9 1625.98   2
 -13   8  -2 8856.40 1348.47   1
 -14  -8  -2 738.378 590.686   2
 -14   8  -2-787.023 680.753   1
  14  -8   2 470.938 532.398   4
 -15   8  -2 7964.53 1407.74   1
 -15  -8  -2 7961.79 1486.88   2
  15  -8   2 8932.26 1506.40   4
 -16   8  -2 21308.4 2296.23   1
 -16   9   2 8841.75 1601.59   1
 -16  -9   2 6753.82 1242.85   2
 -15   9   2 12583.1 1826.00   1
 -15  -9   2 11595.5 1641.76   2
  15  -9  -2 15410.2 2032.28   4
 -14   9   2 11290.1 1677.67   1
 -14  -9   2 9989.62 1486.90   2
  14  -9  -2 7689.57 1367.60   4
  13  -9  -2 184.506 481.725   4
 -13  -9   2 447.158 385.027   2
 -13   9   2 540.846 420.459   1
 -12  -9   2 1720.92 569.192   2
 -12   9   2 2576.37 776.303   1
  12  -9  -2 3017.09 829.959   4
 -11  -9   2 20754.3 1829.66   2
 -11   9   2 24658.0 2096.84   1
  11  -9  -2 20880.2 1964.19   4
 -10   9   2 58558.8 3171.40   1
 -10  -9   2 57018.0 2933.99   2
  10  -9  -2 54571.1 3144.38   4
   9  -9  -2 24982.5 1971.01   4
  -9  -9   2 23276.5 1755.22   2
  -9   9   2 26956.5 1947.84   1
   8  -9  -2 8434.80 1066.55   4
  -8  -9   2 9115.05 994.474   2
  -8   9   2 8309.71 1027.23   1
   7  -9  -2 450.979 304.641   4
  -7   9   2 410.335 249.729   1
  -7  -9   2 642.155 337.612   2
  -6  -9   2 9073.62 832.742   2
  -6   9   2 9730.06 999.137   1
   6  -9  -2 9162.59 963.730   4
  -5  -9   2 21487.2 1222.11   2
  -5   9   2 23809.1 1494.03   1
  -4  -9   2 44882.5 1743.76   2
  -4   9   2 49863.8 2156.58   1
  -3  -9   2 22336.5 1084.62   2
  -3   9   2 24620.8 1366.39   4
   3   9  -2 24198.4 1181.86   2
  -3   9   2 25540.1 1450.30   1
   3  -9  -2 23890.1 1415.30   2
   2   9  -2 6518.87 549.598   2
  -2  -9   2 5637.81 503.025   2
   2  -9  -2 7457.98 746.511   2
  -2   9   2 5693.79 631.651   4
  -1   9   2 20929.9 1137.86   4
   1   9  -2 22346.0 1019.15   2
  -1  -9   2 22176.8 1026.13   2
   1  -9  -2 19744.1 1244.40   2
   0   9  -2 31495.7 1248.77   2
   0  -9  -2 30753.0 1550.67   2
   0  -9   2 31464.0 1275.94   2
  -1   9  -2 137234. 3442.06   2
  -1  -9  -2 141433. 3987.72   2
  -2  -9  -2 117496. 3467.00   2
  -2   9  -2 129133. 3097.95   1
  -3   9  -2 38827.8 1629.92   2
  -3   9  -2 41438.5 1642.93   1
  -3  -9  -2 39603.2 1896.45   2
  -4  -9  -2 5489.30 714.466   2
  -4   9  -2 4415.38 513.759   1
  -4   9  -2 3861.54 530.163   2
  -5   9  -2 147.062 216.447   1
  -5  -9  -2 103.437 245.504   2
  -6   9  -2 18613.2 1340.10   1
  -6  -9  -2 18014.7 1415.06   2
  -7  -9  -2 39927.7 2256.48   2
  -7   9  -2 42249.2 2183.22   1
  -8   9  -2 35433.0 2125.36   1
  -8  -9  -2 38760.3 2333.03   2
  -9  -9  -2 22865.2 1850.53   2
  -9   9  -2 22610.0 1779.09   1
 -10  -9  -2 17052.7 1707.63   2
 -10   9  -2 18533.4 1729.82   1
 -11   9  -2 5382.09 987.082   1
 -11  -9  -2 3746.92 849.287   2
 -12   9  -2 4425.07 894.308   1
 -12  -9  -2 4686.62 1046.12   2
  13  -9   2 15916.0 1868.02   4
 -13  -9  -2 16409.1 1917.66   2
 -13   9  -2 15471.2 1761.50   1
  14  -9   2 17671.6 2008.85   4
 -14  -9  -2 12899.9 1757.23   2
  15  -9   2 7363.61 1331.96   4
 -15   9  -2 9491.67 1485.98   1
 -16   9  -2 2229.40 762.855   1
 -16 -10   2 342.457 595.090   2
 -15 -10   2-205.140 560.974   2
  15 -10  -2-371.739 641.627   4
 -15  10   2-388.447 560.968   1
 -14 -10   2 943.502 565.949   2
 -14  10   2 2299.45 851.719   1
  14 -10  -2 1314.56 768.202   4
  13 -10  -2-467.973 634.466   4
 -13  10   2 281.866 398.034   1
 -13 -10   2-132.969 430.226   2
 -12 -10   2 1234.88 503.060   2
 -12  10   2 3064.46 820.790   1
  12 -10  -2 3389.62 845.141   4
  11 -10  -2 4913.32 989.438   4
 -11  10   2 5342.46 1009.33   1
 -11 -10   2 4560.64 931.645   2
 -10 -10   2 821.479 353.276   2
 -10  10   2 201.833 357.776   1
  10 -10  -2 51.8083 480.537   4
  -9  10   2 5066.65 871.583   1
   9 -10  -2 4143.91 817.867   4
  -9 -10   2 4018.14 734.792   2
  -8  10   2 5327.36 799.786   1
  -8 -10   2 4899.09 733.940   2
   8 -10  -2 4457.93 758.346   4
  -7 -10   2 6252.82 777.821   2
  -7  10   2 6854.16 891.498   1
   7 -10  -2 5888.35 821.594   4
  -6 -10   2 1897.09 402.440   2
  -6  10   2 1213.45 421.823   1
  -5  10   2 13.2415 233.191   1
  -5 -10   2-103.848 159.039   2
  -4  10   2 154.469 251.823   1
  -4 -10   2 328.718 198.631   2
  -3  10   2 8015.19 810.464   1
  -3  10   2 8601.48 820.294   4
   3 -10  -2 8035.65 855.447   2
   3  10  -2 8259.94 714.650   2
  -3 -10   2 8142.90 668.259   2
  -2  10   2 1282.92 316.408   4
   2  10  -2 1217.46 269.055   2
   2 -10  -2 2116.73 458.718   2
  -2 -10   2 1887.28 318.986   2
   1  10  -2 9349.46 674.790   2
  -1  10   2 9661.96 808.921   4
   1 -10  -2 9391.22 860.413   2
  -1 -10   2 9689.75 687.113   2
   0  10  -2 32938.1 1359.14   2
   0 -10   2 32535.6 1377.97   2
   0 -10  -2 33178.0 1681.39   2
  -1 -10  -2 21322.4 1340.49   2
  -1  10  -2 20257.0 1052.22   2
  -2 -10  -2 472.341 228.104   2
  -2  10  -2 695.673 208.129   1
  -2  10  -2 637.983 207.876   2
  -3 -10  -2 10243.7 951.014   2
  -3  10  -2 10637.2 823.475   1
  -3  10  -2 11602.4 846.441   2
  -4 -10  -2 578.320 311.240   2
  -4  10  -2 452.540 213.006   1
  -5  10  -2 501.421 279.088   1
  -5 -10  -2 305.811 256.264   2
  -6  10  -2 13222.1 1161.07   1
  -6 -10  -2 13100.1 1234.57   2
  -7 -10  -2 6305.82 877.702   2
  -7  10  -2 6045.68 800.481   1
  -8 -10  -2 137.033 390.511   2
  -8  10  -2 217.333 313.584   1
  -9 -10  -2 1026.78 485.699   2
  -9  10  -2 1073.38 435.276   1
 -10  10  -2 2733.45 649.542   1
 -10 -10  -2 2728.94 750.779   2
 -11 -10  -2 15252.9 1691.33   2
 -11  10  -2 14424.9 1604.46   1
 -12 -10  -2 1929.45 697.491   2
 -12  10  -2 2756.14 735.591   1
 -13  10  -2 225.694 379.437   1
 -13 -10  -2-26.4812 435.895   2
 -14 -10  -2-253.557 474.333   2
 -14  10  -2 230.629 392.019   1
 -15  10  -2-94.4356 505.703   1
 -16  10  -2-365.414 492.460   1
 -16 -11   2-208.736 484.773   2
 -15  11   2 1095.26 697.648   1
  15 -11  -2 230.186 553.831   4
 -15 -11   2 778.098 576.132   2
 -14  11   2-685.448 745.671   1
 -14 -11   2 873.443 509.719   2
  14 -11  -2-31.5704 536.743   4
  13 -11  -2-1416.37 659.857   4
 -13 -11   2 96.1668 390.515   2
 -13  11   2-799.283 587.142   1
  12 -11  -2 802.718 365.865   4
 -12 -11   2 669.251 503.726   2
 -12  11   2 659.383 457.240   1
  11 -11  -2 1470.68 533.067   4
 -11  11   2 956.903 503.215   1
 -11 -11   2 1340.53 463.094   2
 -10  11   2 1145.76 562.227   1
 -10 -11   2 2121.92 545.210   2
  10 -11  -2 1234.40 375.891   4
   9 -11  -2 258.472 372.985   4
  -9  11   2 1378.86 524.253   1
  -9 -11   2 1668.95 485.194   2
  -8 -11   2 3495.72 620.022   2
  -8  11   2 3257.63 691.815   1
  -7  11   2 1511.91 513.988   1
  -7 -11   2 878.907 306.816   2
  -6 -11   2 1665.42 381.490   2
  -6  11   2 2000.03 522.671   1
  -5 -11   2 3036.43 464.364   2
  -5  11   2 4268.95 698.675   1
  -4 -11   2 20497.2 1192.64   2
  -4  11   2 23256.4 1514.85   1
   3  11  -2 8899.61 754.733   2
   3 -11  -2 9071.90 983.060   2
  -3 -11   2 8408.16 721.153   2
   2  11  -2 16033.0 986.535   2
   2 -11  -2 14555.5 1177.56   2
  -2 -11   2 14555.9 921.656   2
  -1 -11   2 6350.14 598.778   2
   1 -11  -2 7285.14 790.158   2
   1  11  -2 7047.35 624.407   2
  -1  11   2 6544.97 691.409   4
   0  11  -2 126.502 127.361   2
   0 -11   2 245.128 186.305   2
   0 -11  -2 461.739 192.899   2
  -1 -11  -2 2984.48 541.310   2
  -1  11  -2 3510.22 443.841   2
  -2  11  -2 9279.99 762.040   1
  -2  11  -2 8875.29 739.351   2
  -2 -11  -2 8173.26 883.251   2
  -3 -11  -2 13815.5 1130.19   2
  -3  11  -2 13659.8 983.001   1
  -3  11  -2 10890.8 892.063   2
  -4 -11  -2 5605.18 763.668   2
  -4  11  -2 4322.34 589.032   1
  -5  11  -2 599.508 198.741   1
  -5 -11  -2 1228.42 477.420   2
  -6 -11  -2 6840.59 877.400   2
  -6  11  -2 7447.82 867.666   1
  -7  11  -2 37080.0 2094.36   1
  -7 -11  -2 34028.5 2173.85   2
  -8 -11  -2 31428.7 2201.07   2
  -8  11  -2 37949.2 2233.24   1
  -9 -11  -2 6755.01 1053.97   2
  -9  11  -2 7727.62 1038.06   1
 -10 -11  -2 205.558 365.758   2
 -10  11  -2-90.4651 365.472   1
 -11 -11  -2 396.580 376.496   2
 -11  11  -2 827.260 503.354   1
 -12  11  -2-82.5931 326.185   1
 -12 -11  -2 545.013 484.665   2
 -13  11  -2 27.4807 414.862   1
 -13 -11  -2-703.520 644.259   2
 -14  11  -2 3254.86 912.942   1
 -14 -11  -2 2444.09 799.228   2
 -15  11  -2 2454.47 890.022   1
 -16 -12   2 2028.39 750.518   2
 -15  12   2 344.742 633.754   1
 -15 -12   2-546.455 533.058   2
 -14  12   2 3773.34 941.008   1
 -14 -12   2 4152.36 1053.51   2
  14 -12  -2 3319.77 937.778   4
 -13 -12   2 8439.51 1322.61   2
  13 -12  -2 8515.03 1444.82   4
 -12  12   2 23090.9 2226.21   1
 -12 -12   2 20515.2 1946.07   2
  12 -12  -2 22049.8 2194.95   4
  11 -12  -2 10347.8 1445.76   4
 -11  12   2 11462.3 1517.11   1
 -11 -12   2 9426.61 1233.82   2
 -10 -12   2 968.898 348.968   2
 -10  12   2 316.370 368.922   1
  -9 -12   2 5015.87 794.113   2
  -9  12   2 6293.04 1002.83   1
  -8 -12   2 41963.1 2255.34   2
  -8  12   2 41742.8 2500.94   1
  -7  12   2 41644.6 2377.79   1
  -7 -12   2 42791.9 2148.75   2
  -6 -12   2 9272.92 904.669   2
  -6  12   2 9480.01 1079.58   1
  -5 -12   2 187.148 182.377   2
  -5  12   2 318.618 250.332   1
  -4 -12   2 4505.71 586.837   2
  -4  12   2 5025.22 743.958   1
   3 -12  -2 31782.9 1829.91   2
  -3 -12   2 27504.4 1402.51   2
   3  12  -2 28643.0 1483.87   2
  -2 -12   2 54840.8 2082.93   2
   2 -12  -2 58207.2 2546.76   2
   2  12  -2 54444.5 2089.13   2
   1  12  -2 26104.9 1322.64   2
   1 -12  -2 26735.2 1628.22   2
  -1 -12   2 25987.1 1323.26   2
   0  12  -2 33298.3 1522.95   2
   0 -12   2 31854.9 1519.13   2
   0 -12  -2 36011.9 1896.31   2
  -1  12  -2 58054.6 2117.23   2
  -1 -12  -2 53318.6 2403.72   2
  -2  12  -2 4158.05 531.612   2
  -2 -12  -2 4001.65 647.131   2
  -2  12  -2 3349.41 503.886   1
  -3 -12  -2 16464.3 1317.37   2
  -3  12  -2 16577.3 1128.48   1
  -4 -12  -2 12707.4 1162.32   2
  -4  12  -2 14589.2 1089.54   1
  -5 -12  -2 10922.9 1149.44   2
  -5  12  -2 11504.8 1025.97   1
  -6  12  -2 21472.8 1502.66   1
  -6 -12  -2 18378.4 1538.20   2
  -7 -12  -2 4175.77 755.635   2
  -7  12  -2 3924.60 706.727   1
  -8  12  -2 814.700 300.693   1
  -8 -12  -2 1282.53 513.691   2
  -9  12  -2 12366.3 1359.07   1
  -9 -12  -2 12328.4 1442.96   2
 -10  12  -2 22619.8 1936.42   1
 -10 -12  -2 21369.8 1949.03   2
 -11 -12  -2 5917.76 1118.28   2
 -11  12  -2 6598.02 1117.65   1
 -12  12  -2 1674.73 668.808   1
 -12 -12  -2 2271.28 705.098   2
 -13  12  -2 2200.38 782.827   1
 -13 -12  -2 3094.06 917.452   2
 -14  12  -2 698.800 527.865   1
 -15  12  -2 2648.65 824.965   1
 -15 -13   2 11655.3 1664.90   2
 -14  13   2 9953.74 1578.50   1
 -14 -13   2 9174.76 1441.93   2
 -13 -13   2 951.056 437.931   2
 -13  13   2 417.389 574.148   1
 -12  13   2 3851.76 982.028   1
 -12 -13   2 2658.83 706.736   2
 -11  13   2 21518.0 2055.13   1
 -11 -13   2 20428.9 1830.16   2
 -10 -13   2 27717.3 2069.04   2
 -10  13   2 32321.2 2417.11   1
  -9 -13   2 27930.3 1940.73   2
  -9  13   2 29014.1 2187.61   1
  -8  13   2 34863.4 2340.13   1
  -8 -13   2 36370.6 2138.78   2
  -7 -13   2 3213.91 644.365   2
  -7  13   2 3152.19 679.739   1
  -6 -13   2 16936.2 1274.20   2
  -6  13   2 15451.2 1404.57   1
  -5 -13   2 65328.1 2587.62   2
  -5  13   2 65599.3 2991.76   1
  -4  13   2 140174. 4672.30   1
  -4 -13   2 143123. 4122.06   2
   3 -13  -2 111147. 3882.12   2
  -3 -13   2 101750. 3240.01   2
   2 -13  -2 30022.8 1841.04   2
  -2 -13   2 28631.3 1491.02   2
   1 -13  -2 299.489 248.758   2
  -1 -13   2 218.910 218.350   2
   1  13  -2-81.8915 199.566   2
   0 -13  -2 661.456 283.650   2
   0 -13   2 1110.48 325.325   2
  -1 -13  -2 25334.5 1633.95   2
  -2  13  -2 55442.7 2237.01   1
  -2 -13  -2 50520.8 2449.66   2
  -3  13  -2 107378. 3485.54   1
  -3 -13  -2 106096. 3867.47   2
  -4  13  -2 62639.6 2551.27   1
  -4 -13  -2 61749.1 2825.36   2
  -5  13  -2 77.6951 266.555   1
  -5 -13  -2-107.189 374.595   2
  -6 -13  -2 48527.0 2656.50   2
  -6  13  -2 48672.7 2399.28   1
  -7 -13  -2 100207. 4176.83   2
  -7  13  -2 109272. 4018.85   1
  -8 -13  -2 85867.6 3909.88   2
  -8  13  -2 89335.9 3755.62   1
  -9 -13  -2 38782.4 2636.61   2
  -9  13  -2 38295.9 2456.43   1
 -10  13  -2 3901.08 845.883   1
 -10 -13  -2 4636.75 961.464   2
 -11  13  -2 1032.21 559.448   1
 -11 -13  -2 1680.87 664.908   2
 -12 -13  -2 11371.7 1592.43   2
 -12  13  -2 14110.0 1701.95   1
 -13 -13  -2 25155.6 2431.91   2
 -13  13  -2 24689.1 2339.35   1
 -14  13  -2 35996.5 2942.39   1
 -15 -14   2 958.156 736.216   2
 -14  14   2 19452.4 2273.40   1
 -14 -14   2 16997.6 1978.81   2
 -13 -14   2 30898.8 2582.54   2
 -13  14   2 41011.2 3139.53   1
 -12  14   2 51551.4 3427.68   1
 -12 -14   2 47007.5 3031.64   2
 -11  14   2 27266.7 2372.56   1
 -11 -14   2 26603.1 2174.72   2
 -10  14   2 3129.26 789.818   1
 -10 -14   2 3423.44 783.430   2
  -9 -14   2 8922.15 1095.98   2
  -9  14   2 9603.12 1289.17   1
  -8 -14   2 44422.8 2440.32   2
  -8  14   2 43788.4 2708.44   1
  -7 -14   2 86723.1 3396.15   2
  -7  14   2 86489.4 3813.59   1
  -6 -14   2 87848.8 3258.39   2
  -6  14   2 83924.8 3650.24   1
  -5  14   2 51874.6 2668.11   1
  -5 -14   2 45748.0 2182.07   2
  -4 -14   2 1908.64 428.564   2
  -4  14   2 2455.80 567.826   1
  -3 -14   2 13991.6 1044.77   2
  -3  14   2 15687.9 1356.72   1
   3 -14  -2 14800.2 1343.42   2
  -2 -14   2 67495.0 2550.07   2
   2 -14  -2 75654.2 3128.77   2
  -1 -14   2 137006. 4029.24   2
   1 -14  -2 139598. 4528.20   2
   0 -14  -2 97611.8 3689.41   2
   0 -14   2 103600. 3333.41   2
  -1 -14  -2 24671.9 1668.14   2
  -2 -14  -2 96.7993 359.086   2
  -2  14  -2 740.555 240.936   1
  -3  14  -2 41851.5 2056.80   1
  -3 -14  -2 45729.1 2376.62   2
  -4  14  -2 116980. 3861.37   1
  -4 -14  -2 115219. 4223.71   2
  -5  14  -2 153802. 4732.34   1
  -5 -14  -2 146426. 5052.26   2
  -6 -14  -2 81103.0 3602.87   2
  -6  14  -2 79913.3 3293.46   1
  -7 -14  -2 19990.5 1753.21   2
  -7  14  -2 19085.8 1586.51   1
  -8  14  -2 389.344 324.367   1
  -8 -14  -2 305.431 442.219   2
  -9  14  -2 16042.6 1618.78   1
  -9 -14  -2 17810.4 1785.84   2
 -10  14  -2 34258.1 2455.53   1
 -10 -14  -2 29865.7 2444.50   2
 -11 -14  -2 50576.1 3287.86   2
 -11  14  -2 52878.3 3226.63   1
 -12  14  -2 28517.7 2475.49   1
 -12 -14  -2 31004.6 2650.64   2
 -13  14  -2 8620.51 1406.09   1
 -13 -14  -2 8095.50 1433.08   2
 -15 -15   2 23210.3 2466.65   2
 -14 -15   2 11736.6 1636.27   2
 -13 -15   2 628.167 374.033   2
 -13  15   2 2512.60 989.993   1
 -12 -15   2-212.946 485.323   2
 -12  15   2 1651.10 709.772   1
 -11 -15   2 18740.9 1784.93   2
 -11  15   2 20018.5 2083.07   1
 -10 -15   2 61699.8 3295.70   2
 -10  15   2 73522.3 3870.17   1
  -9 -15   2 80793.0 3597.81   2
  -9  15   2 77836.5 3937.88   1
  -8  15   2 44340.5 2766.99   1
  -8 -15   2 43516.3 2468.42   2
  -7  15   2 5576.86 950.696   1
  -7 -15   2 3902.63 688.688   2
  -6 -15   2 6674.87 851.726   2
  -6  15   2 9334.49 1155.28   1
  -5  15   2 70805.4 3295.96   1
  -5 -15   2 68628.3 2803.33   2
  -4  15   2 109989. 4166.92   1
  -4 -15   2 104456. 3560.01   2
   3 -15  -2 91142.0 3703.65   2
  -3  15   2 92654.9 3713.36   1
  -3 -15   2 82642.9 3059.79   2
  -2 -15   2 69377.7 2703.22   2
   2 -15  -2 79985.5 3313.40   2
  -1 -15   2 14974.3 1154.95   2
   1 -15  -2 15803.2 1388.00   2
   0 -15   2 2090.14 475.626   2
   0 -15  -2 1480.54 508.793   2
  -1 -15  -2 43677.2 2392.01   2
  -2  15  -2 60835.6 2559.43   1
  -2 -15  -2 56998.9 2762.25   2
  -3  15  -2 38316.0 2015.28   1
  -3 -15  -2 38131.6 2250.16   2
  -4  15  -2 11872.3 1132.46   1
  -4 -15  -2 10570.7 1177.56   2
  -5 -15  -2 3584.97 712.813   2
  -5  15  -2 2962.28 593.843   1
  -6 -15  -2 3177.57 749.051   2
  -6  15  -2 2239.29 544.440   1
  -7 -15  -2 36695.9 2448.93   2
  -7  15  -2 35590.4 2248.48   1
  -8  15  -2 49252.0 2821.39   1
  -8 -15  -2 51121.8 3037.11   2
  -9 -15  -2 26694.8 2233.50   2
  -9  15  -2 27980.0 2147.81   1
 -10 -15  -2 6420.01 1132.01   2
 -10  15  -2 5549.40 1041.76   1
 -11  15  -2 1496.06 710.687   1
 -11 -15  -2 630.911 392.897   2
 -12 -15  -2 20066.5 2190.67   2
 -14 -16   2 6962.22 1260.76   2
 -13 -16   2 12916.0 1710.08   2
 -13  16   2 15793.9 2055.75   1
 -12 -16   2 15878.0 1773.46   2
 -12  16   2 20841.5 2249.42   1
 -11  16   2 9846.39 1497.21   1
 -11 -16   2 11063.5 1419.42   2
 -10  16   2 16.3859 405.156   1
 -10 -16   2 592.821 305.865   2
  -9 -16   2 10803.1 1262.74   2
  -9  16   2 9878.21 1386.64   1
  -8 -16   2 21754.2 1713.61   2
  -8  16   2 21610.5 1967.39   1
  -7 -16   2 31752.3 2013.81   2
  -7  16   2 32255.5 2333.59   1
  -6  16   2 28637.7 2131.66   1
  -6 -16   2 27951.9 1805.21   2
  -5 -16   2 15100.8 1258.78   2
  -5  16   2 14958.4 1486.43   1
  -4 -16   2 3265.84 597.905   2
  -4  16   2 2793.27 635.529   1
  -3  16   2-321.803 454.272   1
   3 -16  -2 243.981 353.174   2
  -3 -16   2 126.335 242.490   2
   2 -16  -2 16423.0 1481.45   2
  -2 -16   2 13585.1 1140.33   2
   1 -16  -2 37607.8 2261.09   2
  -1 -16   2 38749.6 1991.51   2
   0 -16  -2 49978.6 2651.96   2
   0 -16   2 55717.7 2440.13   2
  -1 -16  -2 25566.2 1856.46   2
  -2  16  -2 2360.04 523.480   1
  -2 -16  -2 1754.73 556.954   2
  -3 -16  -2 386.955 284.457   2
  -3  16  -2 1059.88 367.483   1
  -4 -16  -2 8498.50 1067.42   2
  -4  16  -2 9273.62 1026.47   1
  -5  16  -2 10889.0 1160.86   1
  -5 -16  -2 11346.6 1308.83   2
  -6 -16  -2 6162.71 985.451   2
  -6  16  -2 5489.89 847.219   1
  -7  16  -2 154.253 362.160   1
  -7 -16  -2-253.904 401.556   2
  -8 -16  -2 2354.36 659.222   2
  -8  16  -2 3225.65 721.592   1
  -9 -16  -2 5395.67 1052.16   2
  -9  16  -2 5247.71 968.517   1
 -10 -16  -2 9030.23 1402.60   2
 -10  16  -2 9605.31 1349.99   1
 -11 -16  -2 25606.5 2413.28   2
 -12 -17   2 372.939 336.858   2
 -12  17   2 448.782 419.510   1
 -11  17   2 1479.65 608.491   1
 -11 -17   2 3395.72 790.623   2
 -10 -17   2 3201.13 764.171   2
 -10  17   2 3041.11 931.916   1
  -9 -17   2 941.290 366.953   2
  -9  17   2 757.158 374.387   1
  -8  17   2 1084.01 453.292   1
  -8 -17   2 254.955 255.670   2
  -7 -17   2-196.850 417.650   2
  -7  17   2 822.147 502.448   1
  -6 -17   2 702.603 392.056   2
  -6  17   2 707.630 492.446   1
  -5  17   2 601.970 400.180   1
  -5 -17   2 1155.68 420.887   2
  -4  17   2 348.277 343.941   1
  -4 -17   2 533.507 359.165   2
   3 -17  -2 3821.14 750.514   2
  -3  17   2 2733.02 627.644   1
  -3 -17   2 3000.32 575.217   2
   2 -17  -2 5578.38 944.664   2
  -2 -17   2 6219.31 804.484   2
  -1 -17   2 1337.60 385.220   2
   1 -17  -2 913.047 391.292   2
   0 -17  -2 5351.00 875.598   2
  -1 -17  -2 5632.41 884.236   2
  -2  17  -2 3045.58 579.304   1
  -2 -17  -2 2401.11 574.610   2
  -3  17  -2 593.212 311.094   1
  -3 -17  -2 366.898 287.072   2
  -4 -17  -2 1183.11 506.449   2
  -4  17  -2 1918.22 520.516   1
  -5 -17  -2-118.481 375.530   2
  -5  17  -2 521.305 381.069   1
  -6  17  -2 1055.35 398.707   1
  -6 -17  -2 923.206 420.535   2
  -7 -17  -2 571.365 479.455   2
  -7  17  -2 1020.85 409.989   1
  -8 -17  -2 1682.56 653.256   2
  -8  17  -2 1281.01 495.179   1
  -9 -17  -2 3472.32 843.521   2
  -9  17  -2 3391.13 863.686   1
 -10 -17  -2 6917.31 1210.58   2
 -11 -17  -2 287.176 475.380   2
 -11  18   2 2597.34 851.435   1
 -10 -18   2 840.686 448.934   2
 -10  18   2 541.590 513.990   1
  -9 -18   2 181.290 283.886   2
  -9  18   2-191.011 384.560   1
  -8 -18   2 257.544 289.674   2
  -8  18   2 54.6566 359.544   1
  -7  18   2 2306.30 714.431   1
  -7 -18   2 1961.40 541.177   2
  -6 -18   2 765.745 324.314   2
  -6  18   2 1052.80 473.680   1
  -5  18   2 350.468 291.002   1
  -5 -18   2 913.957 387.228   2
  -4  18   2-35.6493 337.055   1
  -4 -18   2 90.3301 213.641   2
  -3 -18   2 6507.08 834.615   2
  -3  18   2 5528.48 940.926   1
   2 -18  -2 3657.09 808.079   2
  -2 -18   2 2017.66 513.301   2
  -1 -18   2-13.1070 260.698   2
   1 -18  -2 364.048 351.209   2
   0 -18  -2 266.718 288.613   2
  -1  18  -2 1607.44 450.978   1
  -1 -18  -2 2080.32 621.312   2
  -2  18  -2 2066.37 514.389   1
  -2 -18  -2 3247.34 679.173   2
  -3 -18  -2 342.333 360.197   2
  -3  18  -2 382.322 283.203   1
  -4 -18  -2 1560.36 560.778   2
  -4  18  -2 1541.27 482.330   1
  -5 -18  -2 5163.46 958.142   2
  -5  18  -2 7187.07 985.917   1
  -6 -18  -2 3893.24 864.501   2
  -6  18  -2 5698.05 910.785   1
  -7  18  -2 1732.86 570.488   1
  -7 -18  -2 1246.21 530.503   2
  -8 -18  -2 206.710 410.679   2
  -9 -18  -2 954.357 429.959   2
 -10 -18  -2-424.173 597.148   2
 -10  19   2 12323.9 1691.31   1
  -9  19   2 13401.8 1700.70   1
  -8  19   2 14554.3 1735.36   1
  -7  19   2 2320.25 706.464   1
  -7 -19   2 1707.45 550.462   2
  -6  19   2 1456.66 637.687   1
  -6 -19   2 271.848 292.542   2
  -5  19   2 4404.96 937.738   1
  -5 -19   2 5560.17 867.343   2
  -4  19   2 8826.52 1248.28   1
  -4 -19   2 9751.27 1124.82   2
  -3  19   2 9194.41 1252.34   1
  -3 -19   2 8539.96 1013.92   2
   2 -19  -2 4514.74 905.382   2
  -2 -19   2 4282.11 748.149   2
  -1 -19   2-26.4933 293.652   2
   1 -19  -2-152.564 372.983   2
   0 -19  -2 778.139 288.254   2
  -1  19  -2 5914.28 863.890   1
  -1 -19  -2 5751.52 974.505   2
  -2  19  -2 13718.6 1341.24   1
  -2 -19  -2 13642.4 1508.28   2
  -3 -19  -2 16866.5 1696.40   2
  -3  19  -2 16148.9 1486.66   1
  -4  19  -2 9026.70 1129.85   1
  -4 -19  -2 8028.45 1130.60   2
  -5 -19  -2-321.977 582.522   2
  -5  19  -2-91.3398 325.136   1
  -6 -19  -2 7058.73 1182.55   2
  -7 -19  -2 15150.9 1712.69   2
  -8 -19  -2 8004.06 1321.76   2
  -9 -19  -2 2914.09 857.454   2
  -9  20   2-242.252 436.791   1
  -8  20   2 9408.37 1430.47   1
  -7  20   2 32461.2 2596.65   1
  -6  20   2 41038.8 2871.15   1
  -5  20   2 21043.8 2050.12   1
  -4  20   2 3219.18 758.180   1
  -3  20   2 1272.82 510.104   1
  -2 -20   2 22067.4 1704.64   2
  -2  20   2 18755.4 1856.97   1
   2 -20  -2 19284.3 1833.17   2
  -1 -20   2 35689.5 2200.66   2
   1 -20  -2 32667.0 2419.85   2
   0 -20  -2 34080.9 2437.17   2
  -1  20  -2 22940.0 1789.43   1
  -1 -20  -2 21532.1 1889.99   2
  -2 -20  -2 1780.69 619.680   2
  -2  20  -2 1472.92 512.834   1
  -3  20  -2 3057.84 696.707   1
  -3 -20  -2 3180.16 743.025   2
  -4 -20  -2 21376.7 1964.95   2
  -5 -20  -2 30495.0 2428.54   2
  -6 -20  -2 31756.9 2508.96   2
  -7 -20  -2 5746.80 1048.30   2
  -8 -20  -2 1031.00 504.398   2
  -8  21   2 20824.4 2208.56   1
  -7  21   2 1771.57 684.074   1
  -6  21   2 6048.49 1153.04   1
  -5  21   2 32460.7 2585.40   1
  -4  21   2 51309.0 3245.75   1
  -3  21   2 39970.4 2784.17   1
  -2  21   2 12132.9 1502.95   1
   2 -21  -2 13243.6 1586.94   2
   1 -21  -2-389.548 553.384   2
   0 -21  -2 10379.2 1368.98   2
  -1 -21  -2 37032.6 2611.40   2
  -2 -21  -2 39771.0 2739.45   2
  -3 -21  -2 28697.0 2311.94   2
  -4 -21  -2 13610.5 1650.46   2
  -5 -21  -2 380.030 501.192   2
  -6 -21  -2 6994.73 1217.89   2
  -7 -21  -2 25166.4 2366.37   2
  -6  22   2 29535.2 2562.46   1
  -5  22   2 17168.2 1937.49   1
  -4  22   2 1157.12 578.748   1
  -3  22   2 3325.95 865.629   1
  -2  22   2 19880.0 2035.58   1
   1 -22  -2 39752.8 2831.10   2
   0 -22  -2 39856.3 2818.84   2
  -1 -22  -2 13512.4 1664.79   2
  -2 -22  -2 367.036 379.424   2
  -3 -22  -2 5566.92 1078.20   2
  -4 -22  -2 32792.3 2635.93   2
  -5 -22  -2 50174.2 3348.28   2
   1 -23  -2-278.288 638.023   2
   0 -23  -2 9714.03 1415.14   2
  -1 -23  -2 16961.2 1907.13   2
  -2 -23  -2 15348.3 1766.30   2
  -3 -23  -2 7974.69 1278.18   2
  17   0  -3 688.944 651.738   4
 -16   0   3-3380.16 1012.81   1
 -15   0   3-2566.19 864.759   1
 -14   0   3 1467.30 734.421   1
 -13   0   3-148.775 437.953   1
 -12   0   3-185.941 553.782   1
 -12   0   3-20.4740 219.028   3
 -11   0   3-613.572 583.551   1
 -11   0   3 182.211 188.690   3
 -10   0   3-227.128 436.995   1
 -10   0   3 330.482 286.711   3
  -9   0   3 372.709 363.085   1
  -8   0   3 1.96327 395.919   1
   7   0  -3 182.083 192.788   1
  -7   0   3 133.746 416.214   1
   6   0  -3 35.8456 172.116   1
  -6   0   3 214.547 298.564   1
   5   0  -3 170.541 154.703   1
  -5   0   3 355.001 306.327   1
   4   0  -3 184.488 144.308   1
  -4   0   3 169.621 242.560   1
  -3   0   3 72.8637 172.174   1
   3   0  -3 336.430 139.211   1
   2   0  -3-48.8880 90.8545   1
  -2   0   3 127.149 107.758   2
  -2   0   3 61.3526 121.985   1
  -1   0   3 415.364 123.003   1
  -1   0   3 246.017 108.327   2
   1   0  -3 332.800 114.058   2
   0   0   3 186.933 106.499   2
   0   0  -3 136.551 105.694   2
  -1   0  -3-58.9839 123.511   2
  -2   0  -3 488.742 159.947   4
  -2   0  -3 224.241 170.195   2
  -3   0  -3 158.323 160.818   4
   3   0   3 108.168 105.161   4
   4   0   3 166.185 162.781   4
   4   0   3 259.449 224.574   3
   4   0   3 435.409 186.825   1
   5   0   3 39.4379 234.007   1
   5   0   3 112.069 174.710   4
   5   0   3 179.278 138.673   3
   6   0   3-17.2702 191.264   4
   6   0   3-7.73752 212.090   1
   6   0   3-181.496 177.155   3
   7   0   3-114.770 211.225   4
   8   0   3 664.163 410.866   4
   9   0   3 155.500 282.701   4
  10   0   3-158.878 278.740   4
  11   0   3 73.3093 333.620   4
  12   0   3-221.426 409.134   4
  13   0   3-323.068 385.681   4
  14   0   3 570.068 333.740   4
  15   0   3 251.816 468.535   4
  16   0   3-215.884 516.218   4
  17   0   3 304.381 451.981   4
  17  -1  -3 7499.84 1468.48   4
 -17   1   3 7252.65 1447.54   1
 -16   1   3 4158.76 1068.96   1
  16  -1  -3 4102.63 1134.19   4
 -15  -1   3 2305.23 775.239   1
 -15   1   3 3095.83 925.883   1
 -14  -1   3 1381.17 747.375   1
 -14   1   3 1634.22 777.417   1
 -13   1   3-417.268 479.809   1
 -13  -1   3-271.215 437.930   1
 -12   1   3 839.918 519.519   1
 -12   1   3 396.874 287.479   3
 -11  -1   3 17966.2 1739.19   1
 -11   1   3 16710.9 1722.96   1
 -11  -1   3 19997.3 1136.99   3
 -10  -1   3 7630.94 1092.41   1
 -10  -1   3 5663.23 641.550   3
 -10   1   3 5847.18 984.224   1
  -9  -1   3 9807.41 1214.42   1
  -9  -1   3 11144.0 895.895   3
  -9   1   3 10131.5 1150.93   1
  -8  -1   3 3981.40 575.190   3
  -8   1   3 4166.38 711.870   1
  -8  -1   3 2904.60 653.311   1
  -7  -1   3 7763.32 930.035   1
  -7  -1   3 6437.93 750.943   3
  -7   1   3 7103.33 877.552   1
   7   1  -3 5584.39 752.332   1
   6   1  -3 35767.4 1795.68   1
  -6   1   3 39465.9 1915.40   1
  -6  -1   3 37220.4 1929.04   1
   6  -1  -3 36914.7 1794.51   1
  -5  -1   3 216905. 5498.75   1
   5  -1  -3 207962. 5232.48   1
   5   1  -3 209972. 5259.95   1
  -5   1   3 223604. 5433.65   1
  -4  -1   3 492755. 10250.3   1
   4   1  -3 484288. 10011.1   1
   4  -1  -3 486287. 10024.6   1
  -4   1   3 500369. 10140.1   1
  -3   1   3 506492. 9843.60   1
   3  -1  -3 482382. 9765.73   1
   3   1  -3 485937. 9693.59   1
  -3  -1   3 492367. 9880.97   1
  -3   1   3 490403. 9639.49   2
   2  -1  -3 47048.2 1412.00   2
  -2   1   3 48999.9 1429.05   2
  -2  -1   3 47342.0 1416.97   1
   2   1  -3 43748.4 1316.22   1
  -2  -1   3 49771.2 1242.43   2
  -2   1   3 46090.2 1457.27   1
  -1   1   3 8138.58 482.396   2
  -1  -1   3 7928.36 365.708   2
  -1  -1   3 7871.34 380.240   1
   1   1  -3 8931.46 377.966   2
   1  -1  -3 7819.18 471.415   2
   0  -1  -3 10462.9 565.198   2
   0   1  -3 10735.9 460.570   2
   0  -1   3 10570.7 482.559   2
   0   1   3 10626.6 572.331   2
   1   1   3 62737.6 1854.77   2
  -1  -1  -3 62698.5 1427.95   4
  -1   1  -3 64600.6 1696.07   2
   1  -1   3 64988.9 2229.25   3
  -1  -1  -3 66259.5 1844.13   2
  -2   1  -3 127745. 3044.52   4
  -2  -1  -3 128884. 3241.19   2
   2  -1   3 133409. 3489.54   3
  -3  -1  -3 124553. 3439.04   2
   3  -1   3 137146. 3436.00   3
  -3   1  -3 131156. 3249.05   4
   3   1   3 127162. 3003.58   4
   3  -1   3 135741. 3393.04   1
   4   1   3 70742.4 2108.77   4
   4  -1   3 71405.7 2230.71   4
   4  -1   3 73387.5 2178.72   3
   4  -1   3 74435.0 2492.49   1
  -4   1  -3 70561.1 2294.10   4
   5  -1   3 1175.40 368.521   1
   5   1   3 723.195 259.460   4
   5  -1   3 1132.72 299.635   4
   5   1   3 667.225 221.696   1
   6  -1   3 29328.2 1496.28   4
   6   1   3 27243.4 1665.43   1
   6   1   3 26648.9 1428.90   4
   6   1   3 29029.4 1105.01   3
   6  -1   3 25478.2 1623.45   1
   7   1   3 21714.4 818.942   3
   7  -1   3 24058.4 1454.39   4
   7   1   3 22784.5 1401.29   4
   8  -1   3 3822.22 628.935   4
   8   1   3 5399.02 707.318   4
   9  -1   3 8009.55 966.549   4
   9   1   3 8854.54 993.877   4
  10   1   3 1377.65 461.969   4
  10  -1   3 1538.49 508.271   4
  11  -1   3 3007.62 652.355   4
  11   1   3 2382.28 637.571   4
  12   1   3 137.793 294.002   4
  12  -1   3 630.832 398.713   4
  13  -1   3 13216.0 1520.51   4
  13   1   3 12001.9 1405.64   4
  14  -1   3 11274.9 1430.66   4
  14   1   3 10967.2 1423.70   4
  15   1   3 8433.69 1323.01   4
  15  -1   3 9698.66 1422.52   4
  16  -1   3 493.173 459.361   4
  16   1   3 523.667 561.364   4
  17  -1   3 1403.86 616.074   4
  17   1   3 977.491 602.014   4
 -17   2   3 17839.8 2229.33   1
  17  -2  -3 15230.0 2086.36   4
  16  -2  -3 1217.13 886.972   4
 -16   2   3 356.989 407.485   1
  15  -2  -3 20628.1 2245.85   4
 -15   2   3 23746.0 2374.74   1
 -14   2   3 21026.5 2187.13   1
  14  -2  -3 20679.3 2191.60   4
 -13   2   3 38243.4 1733.24   3
 -13  -2   3 35783.0 2728.47   1
 -13   2   3 39341.4 2883.93   1
 -12  -2   3 18088.7 1833.34   1
 -12   2   3 17987.5 1889.16   1
 -11  -2   3 24956.9 2064.72   1
 -11   2   3 26790.9 2169.77   1
 -10  -2   3 474.178 201.723   3
 -10   2   3 796.637 436.284   1
 -10  -2   3 1140.63 551.487   1
  -9   2   3 21297.1 1705.36   1
  -9  -2   3 20940.5 1229.33   3
  -9  -2   3 20295.3 1691.56   1
  -8   2   3 98126.5 3708.14   1
  -8  -2   3 98059.3 3093.80   3
  -8  -2   3 95978.7 3812.70   1
  -7  -2   3 226679. 5650.52   3
   7   2  -3 214064. 6039.57   1
  -7   2   3 243046. 6287.31   1
  -7  -2   3 230917. 6354.28   1
   6   2  -3 167686. 4822.74   1
   6  -2  -3 179367. 4837.13   1
  -6   2   3 181160. 4973.10   1
  -6  -2   3 181401. 4745.90   3
  -6  -2   3 180364. 5101.07   1
   5   2  -3 515.476 271.274   1
  -5  -2   3 899.600 364.314   1
  -5   2   3 765.907 319.077   1
   5  -2  -3 970.341 293.277   1
  -5  -2   3 719.268 311.080   3
  -4   2   3 71834.9 2203.20   2
  -4  -2   3 67392.5 2514.47   3
   4   2  -3 72506.1 2307.00   1
  -4  -2   3 72154.1 2434.31   1
  -4   2   3 74095.4 2354.42   1
   4  -2  -3 74209.9 2331.90   1
  -3   2   3 85469.5 2390.96   1
  -3   2   3 81892.9 2287.05   2
   3  -2  -3 80932.8 2332.95   1
  -3  -2   3 80498.3 2725.08   3
   3   2  -3 82206.6 2269.70   1
  -3  -2   3 81005.0 2398.14   1
   2   2  -3 76578.8 1893.72   1
  -2  -2   3 74664.4 1655.96   2
  -2  -2   3 73805.4 2578.04   3
  -2   2   3 79045.5 2137.84   1
   2  -2  -3 74684.9 2074.02   2
  -2   2   3 79886.2 2106.57   2
  -2  -2   3 75236.1 2010.35   1
  -1   2   3 117554. 2767.57   2
   1   2  -3 110916. 2274.97   1
  -1  -2   3 110846. 2387.04   1
   1  -2  -3 116469. 2757.56   2
  -1  -2   3 108334. 3257.44   3
   0  -2  -3 74348.1 2040.85   2
   0  -2   3 74677.8 2458.37   3
   0   2  -3 73232.8 1620.83   2
   0   2   3 74605.8 2046.25   2
   1   2   3 9328.16 624.823   2
   1  -2   3 9311.47 739.691   3
  -1  -2  -3 8207.87 574.845   2
   1  -2   3 8244.10 394.774   1
   2  -2   3 29914.6 1329.00   3
  -2   2  -3 28103.3 1139.75   4
  -2  -2  -3 27396.6 1214.92   2
   2   2   3 28460.0 815.877   4
   2  -2   3 28696.1 1071.63   1
  -3  -2  -3 51731.4 1905.00   2
   3   2   3 49471.1 1469.79   4
  -3   2  -3 51342.9 1750.35   4
   3  -2   3 52919.9 1816.72   3
   3  -2   3 52045.0 1786.53   1
   4  -2   3 320990. 7267.91   1
  -4  -2  -3 323475. 7393.36   2
  -4   2  -3 330599. 7167.01   4
   4   2   3 320245. 6793.66   4
   4  -2   3 328700. 7094.22   4
   5  -2   3 288283. 6902.40   1
   5   2   3 279809. 6364.80   4
   5  -2   3 281689. 6565.48   4
  -5   2  -3 295904. 6763.55   4
   6  -2   3 83929.2 3149.85   1
   6  -2   3 86091.3 2915.70   4
   6   2   3 82140.1 2747.17   4
   7  -2   3 33831.3 1976.81   1
   7   2   3 32785.7 1707.10   4
   7  -2   3 33569.2 1784.16   4
   7   2   3 35387.9 1201.92   3
   8   2   3 2653.61 566.103   4
   8  -2   3 3108.44 577.286   4
   9  -2   3 12516.9 1219.49   4
   9   2   3 13540.5 1252.86   4
  10  -2   3 116897. 4358.97   4
  10   2   3 122247. 4369.21   4
  11  -2   3 66871.2 3267.28   4
  11   2   3 67481.7 3226.40   4
  12   2   3 28530.1 2104.64   4
  12  -2   3 25471.6 2040.14   4
  13   2   3 7325.34 1098.63   4
  13  -2   3 5706.24 1026.69   4
  14   2   3 272.513 374.559   4
  14  -2   3-263.547 513.525   4
  15   2   3 11958.5 1523.81   4
  15  -2   3 9963.59 1440.35   4
  16   2   3 17899.8 1945.11   4
  16  -2   3 19045.9 2066.16   4
  17   2   3 10519.4 1578.88   4
  17  -3  -3 29647.7 2885.32   4
 -17   3   3 24048.3 2584.05   1
  16  -3  -3 30490.7 2847.87   4
 -16   3   3 34777.0 3019.64   1
  15  -3  -3 23669.3 2392.95   4
 -15   3   3 21594.7 2308.39   1
 -14   3   3 10367.9 1623.02   1
  14  -3  -3 10189.9 1556.93   4
 -13   3   3 183.768 454.062   1
  13  -3  -3 849.789 635.427   4
 -12   3   3 1475.07 609.316   1
  12  -3  -3 1804.30 810.135   4
 -11  -3   3 53403.2 3157.68   1
 -11   3   3 57334.4 3221.03   1
 -10   3   3 123447. 4714.11   1
 -10  -3   3 120959. 4749.64   1
  -9   3   3 176904. 5594.54   1
  -9  -3   3 163202. 5544.07   1
  -8   3   3 21744.5 1612.31   1
  -8  -3   3 19995.6 1573.73   1
  -8  -3   3 20425.6 1224.03   3
   7   3  -3 1344.94 430.116   1
  -7  -3   3 939.703 233.078   3
  -7   3   3 1833.00 470.393   1
  -7  -3   3 1640.87 484.280   1
   6   3  -3 149687. 4399.25   1
  -6  -3   3 145799. 4483.19   1
  -6  -3   3 151450. 4177.82   3
   6  -3  -3 153460. 4342.09   1
  -6   3   3 155191. 4435.37   1
   5   3  -3 582350. 12603.2   1
  -5   3   3 648819. 12718.0   1
  -5  -3   3 611043. 12655.5   3
  -5  -3   3 587010. 12738.6   1
   5  -3  -3 631228. 12645.2   1
   4  -3  -3 121621. 3347.93   1
  -4  -3   3 118305. 3551.97   3
  -4   3   3 122809. 3375.40   1
   4   3  -3 118130. 3301.60   1
  -4  -3   3 120068. 3409.15   1
  -4   3   3 127785. 3310.56   2
   3   3  -3 7434.15 569.398   1
  -3  -3   3 7136.61 709.208   3
  -3   3   3 7930.99 594.341   2
  -3  -3   3 7358.73 592.030   1
  -3   3   3 8656.47 656.894   1
   2   3  -3 14186.2 663.651   1
  -2   3   3 15384.4 837.877   1
  -2  -3   3 14146.6 1000.58   3
  -2   3   3 15077.2 809.570   2
   2  -3  -3 16140.5 827.415   2
   2   3  -3 16073.5 1048.46   3
  -2  -3   3 15714.3 711.157   1
   1  -3  -3 593.583 221.559   2
  -1  -3   3 160.653 212.581   3
   1  -3  -3 407.460 118.901   4
  -1   3   3 447.340 172.364   2
   1   3  -3 966.723 375.146   3
   0  -3  -3 150488. 3582.41   2
   0  -3   3 146024. 3939.38   3
   0   3   3 155442. 3621.92   2
   0   3  -3 141240. 3928.34   3
  -1  -3  -3 120405. 3053.99   2
   1   3   3 117273. 3082.73   2
  -1   3  -3 110483. 3292.34   3
   1  -3   3 118787. 3308.66   3
   2   3   3 167685. 4037.30   2
  -2   3  -3 165346. 3857.81   4
  -2  -3  -3 155415. 3928.67   2
  -2   3  -3 152556. 4097.08   3
   2  -3   3 160417. 3447.86   1
   2   3   3 152846. 3172.92   4
  -3  -3  -3 464362. 9595.93   2
  -3   3  -3 470415. 9425.47   4
  -3   3  -3 457412. 9593.24   3
  -3   3  -3 452861. 9035.72   1
   3  -3   3 437123. 9165.72   1
  -4  -3  -3 258213. 6115.27   2
  -4   3  -3 258764. 5866.09   3
  -4   3  -3 258509. 5885.40   4
  -4   3  -3 245447. 5626.85   1
   5  -3   3-135.565 216.786   4
   5  -3   3 541.567 302.488   1
  -5   3  -3 632.150 299.377   4
  -5   3  -3 503.047 280.710   3
  -5  -3  -3 458.400 341.805   2
  -5   3  -3 418.246 273.980   1
   6  -3   3 141462. 4190.60   4
   6  -3   3 148792. 4444.82   1
  -6   3  -3 143279. 4165.69   1
  -7   3  -3 168854. 4906.75   1
   7  -3   3 169424. 4899.79   4
   7  -3   3 168005. 5151.23   1
   8  -3   3 106436. 3804.07   4
   8   3   3 104855. 3608.13   4
   9  -3   3 70205.0 3139.40   4
   9   3   3 76218.4 3125.59   4
  10  -3   3 199.555 345.760   4
  10   3   3 174.037 337.064   4
  11   3   3 15148.6 1451.22   4
  11  -3   3 15008.1 1507.69   4
  12  -3   3 23214.3 1974.84   4
  12   3   3 25573.3 1974.54   4
  13   3   3 27100.8 2146.79   4
  13  -3   3 29609.9 2328.15   4
  14  -3   3 24922.3 2227.42   4
  14   3   3 23686.5 2112.02   4
  15   3   3 22034.9 2082.09   4
  15  -3   3 19142.4 2038.76   4
  16   3   3 420.280 420.119   4
  16  -3   3 862.799 470.708   4
  17   3   3 4141.69 955.038   4
  17  -4  -3 10946.3 1791.58   4
 -17   4   3 14179.2 2025.71   1
 -16   4   3 1366.69 773.023   1
  16  -4  -3 73.0669 612.800   4
 -15   4   3 10051.7 1607.14   1
  15  -4  -3 13264.8 1816.32   4
  14  -4  -3 34029.8 2837.68   4
 -14   4   3 38705.6 3001.78   1
  13  -4  -3 55839.6 3519.10   4
 -13   4   3 58590.5 3555.66   1
  12  -4  -3 33793.0 2582.81   4
 -12   4   3 36149.4 2658.65   1
 -11   4   3 23113.9 1992.23   1
  11  -4  -3 25234.0 2119.77   4
  10  -4  -3 2496.06 743.659   4
 -10   4   3 2468.92 644.670   1
   9  -4  -3 36581.6 2382.70   4
  -9   4   3 41672.4 2409.57   1
  -8   4   3 113449. 4013.87   1
   8  -4  -3 101366. 4008.51   4
  -7   4   3 181425. 5150.26   1
   7  -4  -3 166950. 5253.50   4
   6  -4  -3 182707. 5320.24   4
  -6   4   3 190398. 5194.66   1
   6   4  -3 196353. 5266.09   1
  -5   4   3 84546.4 2867.92   1
   5  -4  -3 83379.9 2971.19   4
   5  -4  -3 87696.7 2873.64   1
   5   4  -3 93432.3 3020.60   3
  -5   4   3 87083.9 2816.80   2
   5   4  -3 87943.8 2912.10   1
  -4   4   3 60861.2 2173.74   1
   4   4  -3 63869.9 2362.78   3
   4  -4  -3 62830.5 2237.56   4
  -4   4   3 60464.9 2111.00   2
   4  -4  -3 61659.5 2172.59   1
   4   4  -3 58061.8 2093.97   1
   3  -4  -3 267409. 5858.98   2
   3   4  -3 263379. 6246.03   3
   3  -4  -3 263404. 5789.33   4
  -3   4   3 255416. 5851.93   1
  -3   4   3 270153. 5855.63   2
   2   4  -3 204677. 4565.07   1
   2  -4  -3 222029. 4667.17   4
   2   4  -3 220547. 5411.23   3
   2  -4  -3 219546. 4969.64   2
  -2   4   3 223285. 4969.02   2
  -1   4   3 236281. 5060.22   2
   1  -4  -3 236406. 5063.56   2
   1  -4  -3 223568. 4442.01   4
   1   4  -3 216490. 5411.13   3
   1   4  -3 208810. 4343.02   1
   0   4  -3 106482. 3208.56   3
   0   4   3 104007. 2209.56   4
   0  -4  -3 110083. 2907.00   2
  -1   4  -3 48657.2 1928.04   3
   1   4   3 50138.3 1784.15   2
  -1  -4  -3 45126.6 1694.28   2
   2  -4   3 41555.6 1167.97   1
   2   4   3 42430.7 1716.01   2
  -2  -4  -3 41501.0 1650.81   2
  -2   4  -3 40677.9 1741.03   3
  -2   4  -3 42004.9 1250.04   1
  -3   4  -3 23972.9 1257.57   4
  -3  -4  -3 23272.6 1291.23   2
  -3   4  -3 25774.0 1323.39   3
  -3   4  -3 24975.7 1050.85   1
   3  -4   3 23296.4 1007.54   1
  -4   4  -3 171219. 4421.35   3
  -4  -4  -3 166985. 4553.64   2
  -4   4  -3 172839. 4449.79   4
   4  -4   3 159737. 4145.49   1
  -4   4  -3 172943. 4209.24   1
  -5   4  -3 162141. 4447.13   4
  -5  -4  -3 153284. 4512.38   2
  -5   4  -3 163876. 4218.07   3
  -5   4  -3 155858. 4201.54   1
   5  -4   3 150789. 4233.35   1
   6  -4   3 24792.3 1486.30   4
   6  -4   3 21889.0 1413.79   1
  -6  -4  -3 24499.6 1580.89   2
  -6   4  -3 24543.8 1432.66   1
  -6   4  -3 26555.6 1342.26   3
   7  -4   3 5729.76 755.491   1
   7  -4   3 6692.43 793.972   4
  -7   4  -3 7015.89 834.885   1
  -7   4  -3 6877.05 681.625   3
  -7  -4  -3 7078.95 921.196   2
  -8  -4  -3 17144.0 1548.44   2
   8  -4   3 17995.3 1413.00   4
  -8   4  -3 18273.1 1406.29   1
   9  -4   3 48218.8 2562.62   4
  -9   4  -3 54155.1 2661.78   1
  10  -4   3 99527.3 4036.26   4
  11   4   3 49154.5 2672.91   4
  11  -4   3 42618.7 2661.41   4
  12   4   3 35428.7 2338.51   4
  12  -4   3 38144.4 2576.60   4
  13   4   3 6171.48 997.707   4
  13  -4   3 4547.04 951.238   4
  14  -4   3 5396.58 1062.64   4
  14   4   3 3589.87 850.820   4
  15   4   3 16034.2 1782.71   4
  15  -4   3 17814.8 1971.08   4
  16   4   3 38237.1 2873.42   4
  16  -4   3 38481.1 3010.36   4
 -17   5   3 19582.9 2392.85   1
  17  -5  -3 19122.6 2341.61   4
  16  -5  -3 36950.8 3152.05   4
 -16   5   3 33590.1 2973.07   1
  15  -5  -3 23587.0 2431.81   4
 -15   5   3 23038.6 2400.75   1
 -14   5   3 8582.66 1413.73   1
  14  -5  -3 9345.65 1463.02   4
 -13   5   3 2248.39 687.726   1
  13  -5  -3 1075.74 545.992   4
 -12   5   3 5229.12 1005.48   1
  12  -5  -3 4896.94 1017.03   4
  11  -5  -3 8953.04 1325.90   4
 -11   5   3 7791.83 1155.11   1
 -10   5   3 61151.4 3124.40   1
  10  -5  -3 56160.5 3170.36   4
   9  -5  -3 110347. 4388.89   4
  -9   5   3 115578. 4340.97   1
   8  -5  -3 65558.8 3090.51   4
  -8   5   3 72228.7 3058.32   1
   7  -5  -3 9670.92 1056.47   4
  -7   5   3 11092.2 1054.64   1
   6  -5  -3 24914.7 1603.91   4
  -6   5   3 26795.1 1579.05   1
   6   5  -3 27913.0 1551.49   3
   6   5  -3 25941.0 1568.98   1
   5  -5  -3 124326. 3726.07   1
   5   5  -3 127118. 3762.91   1
   5   5  -3 133937. 3893.47   3
  -5   5   3 125292. 3744.86   1
  -5   5   3 124489. 3669.08   2
   5  -5  -3 125854. 3821.75   4
   4   5  -3 190312. 4968.21   3
   4  -5  -3 186584. 4698.28   4
  -4   5   3 184896. 4741.45   1
  -4   5   3 178307. 4617.57   2
   4   5  -3 186957. 4647.61   1
   3  -5  -3 120574. 3346.20   2
   3   5  -3 120377. 3622.74   3
   3  -5  -3 118265. 3166.81   4
  -3   5   3 121745. 3374.33   1
   3   5  -3 122287. 3150.75   1
  -3   5   3 118675. 3337.32   2
  -3  -5   3 121264. 2693.95   2
  -2  -5   3 4534.30 243.943   2
   2  -5  -3 4893.56 419.571   4
   2   5  -3 5224.87 423.176   1
   2   5  -3 4904.65 587.388   3
   2  -5  -3 4974.61 562.095   2
  -2   5   3 5677.51 543.398   2
  -1   5   3 15207.8 912.651   2
  -1   5   3 15522.4 698.279   4
   1   5  -3 14288.7 1029.45   3
   1  -5  -3 16340.2 946.754   2
   0   5   3 20081.5 1058.21   2
   0   5  -3 16651.2 544.636   2
   0   5   3 18730.7 652.914   4
   0   5  -3 18450.8 1147.26   3
   0  -5  -3 19533.0 1048.96   2
  -1  -5  -3 86306.2 2589.65   2
   1   5   3 85687.4 2622.13   2
  -1   5  -3 81954.1 1848.55   1
  -1   5  -3 80298.8 2747.13   3
  -2   5  -3 204003. 4280.43   1
  -2  -5  -3 198092. 4935.92   2
  -2   5  -3 197174. 5090.50   3
   2   5   3 209142. 5089.65   2
  -3   5  -3 125772. 3656.92   3
  -3  -5  -3 120243. 3581.95   2
  -3   5  -3 128256. 3596.14   4
   3   5   3 132290. 3755.51   2
   3  -5   3 126327. 3016.38   1
  -3   5  -3 125782. 3164.33   1
  -4   5  -3 4432.75 513.478   1
   4  -5   3 5581.39 523.354   1
  -4  -5  -3 4890.89 674.037   2
  -4   5  -3 4535.71 574.830   4
  -4   5  -3 4514.75 556.747   3
  -5   5  -3 33830.1 1611.61   1
  -5  -5  -3 31895.0 1750.33   2
  -5   5  -3 32467.5 1577.08   3
   5  -5   3 32064.1 1525.62   1
  -6   5  -3 92941.3 2982.54   3
  -6  -5  -3 93814.4 3431.56   2
  -6   5  -3 93012.5 3133.56   1
   6  -5   3 87339.2 3098.78   1
  -7  -5  -3 99548.7 3695.28   2
  -7   5  -3 97371.2 3089.90   3
  -7   5  -3 97608.2 3434.53   1
   7  -5   3 99511.8 3537.55   4
   8  -5   3 75860.1 3159.49   4
  -8   5  -3 74198.5 2595.24   3
  -8  -5  -3 69412.2 3208.83   2
  -8   5  -3 76096.4 3123.65   1
   9  -5   3 14158.4 1340.81   4
  -9   5  -3 16047.2 1069.48   3
  -9   5  -3 13592.6 1315.47   1
  -9  -5  -3 14872.7 1453.08   2
  10  -5   3 153.919 291.461   4
 -10   5  -3-202.823 413.025   1
 -10  -5  -3 209.578 367.633   2
  11  -5   3 3890.35 774.560   4
 -11  -5  -3 3832.31 859.469   2
 -11   5  -3 4692.50 852.760   1
  12  -5   3 16717.2 1711.91   4
  12   5   3 18931.6 1712.86   4
 -12  -5  -3 16133.4 1768.49   2
 -13  -5  -3 25172.2 2340.74   2
  13  -5   3 30975.4 2431.41   4
  13   5   3 31027.3 2267.38   4
  14   5   3 37949.3 2636.30   4
  14  -5   3 36252.6 2760.40   4
 -14  -5  -3 34924.5 2895.91   2
  15  -5   3 13391.1 1733.13   4
  15   5   3 16148.0 1800.58   4
 -15  -5  -3 13960.1 1885.05   2
  16   5   3 2218.99 785.330   4
  16  -5   3 2686.69 814.829   4
 -16   6   3 3697.01 1156.53   1
  16  -6  -3 3022.89 940.788   4
 -15   6   3 868.595 705.439   1
  15  -6  -3 151.942 455.907   4
  14  -6  -3 12561.5 1750.06   4
 -14   6   3 15358.7 1897.78   1
 -13   6   3 9889.45 1449.66   1
  13  -6  -3 6966.64 1232.04   4
  12  -6  -3 10484.2 1402.69   4
 -12   6   3 12474.3 1534.98   1
  11  -6  -3 1908.44 630.052   4
 -11   6   3 3154.49 834.705   1
 -10   6   3 156.138 404.292   1
  10  -6  -3 16.6951 370.405   4
   9  -6  -3 598.056 495.368   4
  -9   6   3 1016.79 529.751   1
   8  -6  -3 19388.7 1610.93   4
  -8   6   3 21172.0 1573.25   1
   7  -6  -3 52810.2 2546.18   4
   7   6  -3 50921.8 2255.51   3
  -7   6   3 52261.0 2463.51   1
  -6   6   3 32186.6 1775.81   1
   6  -6  -3 34411.0 1886.78   4
   6   6  -3 35324.0 1872.98   1
   6   6  -3 35576.6 1813.04   3
   5  -6  -3 22863.0 1383.36   4
  -5   6   3 24470.4 1432.39   1
   5   6  -3 26009.6 1499.20   3
   5   6  -3 23115.0 1381.95   1
  -4  -6   3 3186.11 361.844   2
   4  -6  -3 3315.93 464.664   4
   4   6  -3 3277.72 526.709   3
  -4   6   3 1847.45 378.080   1
  -4   6   3 2757.93 439.712   2
   4   6  -3 2529.06 406.669   1
   3  -6  -3 31562.7 1505.35   2
  -3   6   3 28891.6 1446.23   1
  -3  -6   3 30788.5 1011.41   2
   3  -6  -3 31145.9 1336.05   4
   3   6  -3 30967.7 1630.92   3
   3   6  -3 31168.1 1327.84   1
  -3   6   3 31366.7 1467.67   2
  -2   6   3 88257.3 2481.08   4
   2  -6  -3 87126.5 2744.14   2
   2   6  -3 91868.5 3066.28   3
  -2   6   3 86573.5 2710.94   2
  -2  -6   3 90038.9 1981.59   2
  -1   6   3 113492. 3165.95   2
  -1   6   3 108665. 2675.33   4
   1   6  -3 112427. 2302.92   2
   1   6  -3 118259. 3508.11   3
  -1  -6   3 102535. 2282.33   2
   1  -6  -3 107314. 3125.46   2
   0   6   3 81763.1 2002.77   4
   0   6  -3 80490.8 2825.13   3
   0   6   3 84320.2 2610.90   2
   0   6  -3 76272.4 1801.18   2
   0  -6  -3 84467.0 2611.92   2
  -1  -6  -3 7355.47 663.023   2
  -1   6  -3 8053.51 771.362   3
  -1   6  -3 7830.68 459.178   2
   1   6   3 7708.00 709.170   2
  -1   6  -3 8231.79 424.432   1
  -2   6  -3 2117.92 255.473   1
  -2  -6  -3 1774.68 380.723   2
   2   6   3 1869.40 365.554   2
  -3   6  -3 24897.9 1096.04   1
  -3   6  -3 24344.0 1401.94   3
  -3   6  -3 23891.4 1362.11   4
  -3  -6  -3 25042.9 1399.26   2
   3  -6   3 25768.5 1011.33   1
  -4  -6  -3 582.814 234.090   2
   4  -6   3 426.610 152.990   1
  -4   6  -3 736.336 245.871   1
  -4   6  -3 260.180 213.178   3
   5  -6   3 6017.25 619.647   1
  -5  -6  -3 5121.03 685.209   2
  -5   6  -3 5414.75 652.684   3
  -5   6  -3 5700.08 641.680   1
   6  -6   3 31577.9 1655.38   1
  -6  -6  -3 31446.8 1869.33   2
  -6   6  -3 30976.0 1671.48   1
  -6   6  -3 31132.8 1626.51   3
  -7   6  -3 490.585 319.802   1
  -7  -6  -3 85.5230 300.739   2
  -7   6  -3 532.348 189.792   3
   7  -6   3 467.693 259.463   1
  -8   6  -3 4173.00 734.752   1
   8  -6   3 3945.06 713.971   4
  -8   6  -3 4845.25 625.762   3
  -8  -6  -3 3313.12 693.890   2
   9  -6   3 30471.4 2058.49   4
  -9   6  -3 32061.6 1630.58   3
  -9   6  -3 31494.6 2021.12   1
  -9  -6  -3 29407.3 2120.63   2
  10  -6   3 14675.3 1485.96   4
 -10   6  -3 16282.1 1505.70   1
  11  -6   3 24442.1 2003.70   4
 -11  -6  -3 23461.6 2089.22   2
 -11   6  -3 26289.6 2024.13   1
 -12  -6  -3 882.326 499.212   2
  12  -6   3 1031.93 454.242   4
 -12   6  -3 1279.20 609.459   1
  13  -6   3-334.469 425.969   4
  13   6   3 399.021 425.125   4
 -13  -6  -3-459.102 637.467   2
  14  -6   3 2383.24 737.722   4
 -14  -6  -3 2470.08 792.425   2
  14   6   3 3852.12 933.877   4
  15   6   3 10302.7 1447.36   4
 -15  -6  -3 11429.2 1692.59   2
  15  -6   3 11416.0 1595.82   4
 -16   7   3 634.093 608.695   1
  16  -7  -3 1372.19 752.413   4
 -15   7   3 1978.16 741.054   1
  15  -7  -3 1160.02 601.218   4
 -14   7   3 2697.46 796.804   1
  14  -7  -3 3504.32 878.735   4
 -13   7   3 2215.63 785.652   1
  13  -7  -3 1582.30 659.896   4
  12  -7  -3 773.244 438.093   4
 -12   7   3 1991.88 702.653   1
 -11   7   3 289.916 456.321   1
  11  -7  -3-71.1276 405.240   4
  10  -7  -3 2000.45 611.600   4
 -10   7   3 1542.08 570.527   1
  -9   7   3 855.125 393.867   1
   9  -7  -3-134.652 402.737   4
  -8   7   3 1545.37 424.964   1
   8  -7  -3 1405.73 482.507   4
   8   7  -3 1832.23 490.541   3
  -7   7   3-290.235 413.910   1
   7   7  -3 531.413 263.937   3
   7  -7  -3 571.490 370.339   4
   6   7  -3 3060.35 564.083   1
   6   7  -3 3783.57 568.821   3
   6  -7  -3 3567.77 575.885   4
  -6  -7   3 3266.51 477.446   2
  -6   7   3 3605.42 586.427   1
   5  -7  -3 332.059 199.267   4
  -5  -7   3 550.317 204.201   2
   5   7  -3 864.673 297.442   3
  -5   7   3 1034.30 354.604   1
   5   7  -3 495.914 208.973   1
   4  -7  -3 357.699 210.344   4
  -4  -7   3 590.263 193.702   2
   4   7  -3-65.8223 256.834   3
  -4   7   3 193.445 201.355   1
  -3  -7   3 14733.3 693.202   2
  -3   7   3 15963.0 978.623   4
   3  -7  -3 12504.3 852.389   4
  -3   7   3 14519.1 1011.97   2
  -3   7   3 15946.9 1081.10   1
   3   7  -3 15166.0 1143.74   3
   3  -7  -3 15433.4 1055.65   2
  -2   7   3 9882.33 705.082   4
   2   7  -3 7880.29 818.872   3
   2  -7  -3 9568.77 812.112   2
  -2  -7   3 9544.09 480.387   2
  -2   7   3 9632.10 796.751   2
  -1   7   3 1588.49 349.981   2
  -1   7   3 766.059 190.190   4
  -1  -7   3 1513.00 189.737   2
   1   7  -3 1361.44 175.783   2
   1  -7  -3 1389.12 354.866   2
   0   7   3 59305.5 1688.56   4
   0   7   3 57672.8 2161.43   2
   0  -7  -3 59322.7 2182.83   2
   0   7  -3 53960.9 1474.71   2
   1   7   3 7562.01 727.120   2
  -1   7  -3 7769.24 464.427   1
  -1  -7  -3 8270.41 779.170   2
  -1   7  -3 7108.92 461.447   2
  -2  -7  -3 280.639 227.831   2
  -2   7  -3 756.796 174.202   1
  -2   7  -3 153.141 128.403   2
  -3  -7  -3 903.861 317.793   2
  -3   7  -3 851.243 210.486   1
  -4   7  -3 12378.1 860.687   1
  -4  -7  -3 11292.7 999.253   2
   4  -7   3 11865.4 762.205   1
   5  -7   3 986.226 269.945   1
  -5   7  -3 333.041 265.513   1
  -5  -7  -3 622.613 278.699   2
   6  -7   3 2459.64 429.320   1
  -6   7  -3 3133.31 534.593   1
  -6  -7  -3 2858.46 545.878   2
  -6   7  -3 2810.70 471.273   3
  -7   7  -3 5944.00 795.568   1
  -7  -7  -3 4516.54 755.853   2
  -7   7  -3 4519.14 614.114   3
  -8   7  -3 1003.98 355.408   1
  -8  -7  -3 695.388 339.798   2
  -8   7  -3 837.298 228.500   3
  -9   7  -3 4710.43 819.224   1
  -9   7  -3 4267.60 610.195   3
  -9  -7  -3 4805.98 862.154   2
  10  -7   3-353.676 316.575   4
 -10  -7  -3-190.096 456.073   2
 -10   7  -3-326.247 360.514   1
  11  -7   3-595.301 531.984   4
 -11   7  -3 63.2735 379.578   1
  12  -7   3 1090.09 380.752   4
 -12  -7  -3 1457.47 592.188   2
 -12   7  -3 1393.17 548.831   1
  13  -7   3 1969.93 711.154   4
 -13  -7  -3 1318.71 703.523   2
 -13   7  -3 609.834 415.428   1
  14  -7   3-947.271 815.950   4
  14   7   3 303.841 514.893   4
 -14  -7  -3 20.4822 455.763   2
  15  -7   3-1439.29 827.601   4
 -16   8   3 1146.30 726.882   1
  16  -8  -3-474.884 658.890   4
 -15   8   3 4602.77 1066.16   1
  15  -8  -3 5364.77 1279.15   4
 -14   8   3 3029.56 897.532   1
  14  -8  -3 3943.97 1024.33   4
  13  -8  -3 10251.4 1487.15   4
 -13   8   3 8806.19 1351.34   1
  12  -8  -3 14622.4 1733.73   4
 -12   8   3 17432.2 1841.70   1
 -11   8   3 32702.8 2409.92   1
  11  -8  -3 25233.3 2172.20   4
 -10   8   3 3965.81 807.567   1
  10  -8  -3 3017.20 665.203   4
  -9   8   3 896.799 388.845   1
   9  -8  -3 798.558 404.729   4
   8  -8  -3 30243.4 2022.83   4
  -8  -8   3 31470.5 1816.98   2
  -8   8   3 32341.8 2039.99   1
   7  -8  -3 50990.2 2524.28   4
  -7  -8   3 49668.9 2178.89   2
  -7   8   3 50016.4 2464.96   1
   6  -8  -3 38878.8 2043.18   4
  -6  -8   3 37857.6 1697.92   2
  -6   8   3 38441.7 2036.91   1
  -5   8   3 1009.82 328.575   1
  -5  -8   3 481.372 213.472   2
   5   8  -3 679.152 272.980   1
   5  -8  -3 214.403 206.526   4
  -4  -8   3 24515.3 1065.03   2
  -4   8   3 22892.1 1407.27   1
   4  -8  -3 23229.6 1321.38   4
  -4   8   3 25141.9 1416.66   4
  -3   8   3 766.935 279.614   4
  -3  -8   3 822.477 177.185   2
   3  -8  -3 908.452 316.730   2
  -3   8   3 652.875 260.481   1
  -2   8   3 3159.62 419.460   4
   2   8  -3 2683.96 293.158   2
   2  -8  -3 2221.08 436.529   2
  -2  -8   3 2259.89 259.025   2
   1  -8  -3 10332.3 889.139   2
   1   8  -3 12303.6 601.400   2
  -1   8   3 11900.1 758.255   4
  -1  -8   3 11925.2 600.710   2
   0   8  -3 13350.2 647.794   2
   0   8   3 12993.2 748.846   4
   0  -8  -3 14115.6 1031.81   2
  -1  -8  -3 5428.75 654.801   2
  -1   8  -3 6189.90 463.803   2
  -1   8  -3 6272.70 490.419   1
  -2   8  -3 6843.43 511.426   1
  -2   8  -3 6625.78 534.104   2
  -2  -8  -3 7314.14 769.144   2
  -3   8  -3 3594.53 420.601   1
  -3  -8  -3 3921.23 606.838   2
  -3   8  -3 4659.92 483.783   2
  -4  -8  -3 73339.2 2885.54   2
  -4   8  -3 76849.9 2487.07   1
  -5   8  -3 90948.1 2987.29   1
   5  -8   3 89290.2 2798.98   1
  -5  -8  -3 93351.8 3391.09   2
   6  -8   3 18343.1 1207.70   1
  -6  -8  -3 18245.3 1430.40   2
  -6   8  -3 20748.5 1362.11   1
  -7   8  -3 1835.89 465.257   1
  -7  -8  -3 1219.97 374.428   2
  -8   8  -3 973.475 426.117   1
  -8  -8  -3 1763.03 487.050   2
  -9   8  -3 2087.95 541.140   1
  -9  -8  -3 2153.60 673.254   2
 -10  -8  -3 37241.8 2559.05   2
 -10   8  -3 39014.8 2432.42   1
 -11  -8  -3 11399.7 1438.60   2
 -11   8  -3 11900.7 1391.92   1
 -12  -8  -3 1065.59 551.204   2
 -12   8  -3 3118.99 749.339   1
 -13  -8  -3 535.097 438.742   2
 -13   8  -3-180.606 363.456   1
 -14  -8  -3 302.868 553.152   2
 -14   8  -3 717.316 554.887   1
 -17  -9   3 11513.8 1756.89   2
 -16  -9   3 22931.8 2424.72   2
 -16   9   3 24117.7 2627.63   1
 -15   9   3 15828.3 2040.81   1
 -15  -9   3 18490.5 2078.38   2
  15  -9  -3 17736.9 2158.51   4
 -14   9   3 9810.58 1552.17   1
  14  -9  -3 8270.43 1488.87   4
 -14  -9   3 7597.00 1287.51   2
 -13  -9   3 2790.15 834.927   2
 -13   9   3 3530.98 1003.11   1
  13  -9  -3 1700.20 606.195   4
  12  -9  -3 2101.50 649.264   4
 -12   9   3 4448.31 961.021   1
 -12  -9   3 3580.27 850.756   2
  11  -9  -3 41301.1 2863.08   4
 -11  -9   3 44005.7 2643.00   2
 -11   9   3 44892.9 2864.12   1
 -10   9   3 88052.1 4005.06   1
 -10  -9   3 88924.6 3745.69   2
  10  -9  -3 89405.8 4097.87   4
   9  -9  -3 74420.1 3504.24   4
  -9  -9   3 64728.9 2978.25   2
  -9   9   3 76636.6 3453.01   1
  -8  -9   3 38824.2 2072.53   2
   8  -9  -3 41718.4 2448.11   4
  -7  -9   3 9232.95 870.056   2
   7  -9  -3 7429.37 916.617   4
  -7   9   3 8714.95 985.066   1
  -6   9   3 15905.6 1279.21   1
  -6  -9   3 14645.0 1016.44   2
   6  -9  -3 15644.2 1250.43   4
   5  -9  -3 78677.9 2934.54   4
   5   9  -3 85832.3 3040.85   1
  -5   9   3 84794.1 3159.76   1
  -5  -9   3 77206.5 2477.47   2
  -4  -9   3 83547.6 2434.37   2
  -4   9   3 84144.5 2967.43   4
  -4   9   3 87058.5 3114.36   1
   4  -9  -3 88922.9 3152.72   2
  -3   9   3 32280.2 1574.63   4
   3  -9  -3 31763.9 1689.57   2
  -3  -9   3 29653.2 1176.56   2
   2   9  -3 3183.85 347.651   2
  -2   9   3 3302.62 452.692   4
   2  -9  -3 3264.13 523.591   2
  -2  -9   3 3864.82 374.360   2
  -1   9   3 317.759 159.276   4
   1   9  -3 411.109 126.732   2
  -1  -9   3 703.996 183.955   2
   1  -9  -3 496.371 271.035   2
   0   9   3 13171.6 817.511   4
   0   9  -3 13312.6 700.460   2
   0  -9  -3 13274.3 1038.86   2
  -1   9  -3 48807.6 1580.43   1
  -1   9  -3 44493.5 1512.35   2
  -1  -9  -3 45068.9 2055.34   2
  -2   9  -3 31456.3 1244.69   1
  -2   9  -3 27246.1 1207.67   2
  -2  -9  -3 29338.6 1611.83   2
  -3  -9  -3 51887.5 2354.34   2
  -3   9  -3 52535.1 1876.53   1
  -4  -9  -3 36317.1 1961.90   2
  -4   9  -3 38480.9 1712.49   2
  -4   9  -3 38226.7 1652.61   1
  -5  -9  -3 20385.6 1519.47   2
  -5   9  -3 20181.5 1258.54   1
  -6  -9  -3 90541.4 3589.45   2
  -6   9  -3 95985.9 3306.95   1
   6  -9   3 93451.0 3092.96   1
  -7   9  -3 98349.2 3545.47   1
  -7  -9  -3 91811.2 3774.31   2
  -8  -9  -3 53106.6 2877.43   2
  -8   9  -3 60338.4 2809.81   1
  -9  -9  -3 53538.7 2982.51   2
  -9   9  -3 51853.0 2776.52   1
 -10   9  -3 5864.09 967.749   1
 -10  -9  -3 4590.86 890.664   2
 -11   9  -3 10200.0 1292.85   1
 -11  -9  -3 10874.4 1420.46   2
 -12  -9  -3 24103.8 2241.07   2
 -12   9  -3 19755.0 1871.24   1
 -13  -9  -3 30065.0 2621.33   2
 -13   9  -3 28636.2 2399.05   1
 -14  -9  -3 18030.0 2100.49   2
 -14   9  -3 15601.5 1798.44   1
 -17 -10   3 3306.73 970.833   2
 -16 -10   3 982.000 683.958   2
 -15 -10   3 6246.89 1240.42   2
  15 -10  -3 7535.16 1426.98   4
 -15  10   3 6141.69 1343.20   1
 -14  10   3 30351.6 2728.91   1
 -14 -10   3 30027.1 2549.02   2
  14 -10  -3 29894.6 2733.64   4
 -13  10   3 47043.4 3261.97   1
 -13 -10   3 45471.1 2996.02   2
  13 -10  -3 45732.5 3302.85   4
 -12  10   3 57032.5 3441.44   1
  12 -10  -3 52332.7 3408.57   4
 -12 -10   3 55001.8 3140.46   2
 -11  10   3 46452.8 2942.17   1
 -11 -10   3 39265.9 2505.00   2
  11 -10  -3 38385.8 2752.64   4
 -10  10   3 8987.87 1273.35   1
 -10 -10   3 8071.99 1056.15   2
  10 -10  -3 7346.61 1117.11   4
   9 -10  -3 17655.3 1673.34   4
  -9 -10   3 16480.5 1393.78   2
  -9  10   3 17533.9 1643.03   1
  -8 -10   3 85166.0 3255.11   2
   8 -10  -3 90361.3 3774.28   4
  -8  10   3 89869.9 3746.00   1
  -7  10   3 118296. 4205.83   1
  -7 -10   3 113550. 3662.58   2
   7 -10  -3 111861. 4120.70   4
   6 -10  -3 107552. 3788.79   4
  -6 -10   3 110293. 3322.81   2
  -6  10   3 101471. 3792.43   1
  -5 -10   3 37434.8 1594.32   2
  -5  10   3 36718.4 2027.47   1
  -4 -10   3 1693.86 326.860   2
   4 -10  -3 2280.67 554.709   2
  -4  10   3 2024.52 467.884   1
  -3  10   3 37864.0 1794.27   4
   3 -10  -3 38092.1 1974.95   2
  -3 -10   3 39479.6 1447.49   2
   2 -10  -3 56279.2 2416.10   2
  -2 -10   3 54770.5 1796.98   2
  -2  10   3 59914.1 2211.08   4
  -1 -10   3 62920.0 1963.37   2
   1  10  -3 68119.8 1991.36   2
  -1  10   3 68754.4 2320.93   4
   1 -10  -3 67641.7 2655.69   2
   0  10  -3 39560.9 1425.67   2
   0  10   3 37998.3 1579.74   4
   0 -10  -3 41121.4 1960.26   2
  -1 -10  -3 7092.53 785.921   2
  -1  10  -3 7650.70 588.046   2
  -1  10  -3 7935.25 614.722   1
  -2 -10  -3 1736.54 406.633   2
  -2  10  -3 2085.40 318.865   1
  -2  10  -3 2023.85 325.326   2
  -3  10  -3 45495.3 1742.96   1
  -3 -10  -3 43996.4 2163.63   2
  -3  10  -3 41898.4 1717.35   2
  -4  10  -3 122644. 3534.63   1
  -4  10  -3 123086. 3603.07   2
  -4 -10  -3 117784. 4042.80   2
  -5 -10  -3 137568. 4572.35   2
  -5  10  -3 137933. 4056.20   1
  -6 -10  -3 73857.1 3218.52   2
  -6  10  -3 78278.4 2954.07   1
  -7  10  -3 10922.7 1080.65   1
  -7 -10  -3 10375.6 1170.02   2
  -8  10  -3 1973.77 525.885   1
  -8 -10  -3 878.395 376.368   2
  -9 -10  -3 49824.7 2930.90   2
  -9  10  -3 51954.6 2771.38   1
 -10 -10  -3 30776.7 2370.77   2
 -10  10  -3 33726.7 2310.20   1
 -11  10  -3 23626.2 2007.42   1
 -11 -10  -3 22643.7 2081.28   2
 -12 -10  -3 6461.68 1156.90   2
 -12  10  -3 7337.68 1172.57   1
 -13 -10  -3-722.813 561.065   2
 -13  10  -3 846.868 572.426   1
 -14 -10  -3 5176.05 1170.41   2
 -14  10  -3 6080.54 1195.61   1
 -15  10  -3 22749.1 2286.19   1
 -16 -11   3 29397.5 2739.72   2
 -15  11   3 29856.6 2842.28   1
 -15 -11   3 24402.6 2389.35   2
  15 -11  -3 24561.1 2602.46   4
 -14  11   3 9390.12 1546.79   1
  14 -11  -3 5929.20 1236.51   4
 -14 -11   3 8445.98 1372.05   2
  13 -11  -3 1119.99 646.035   4
 -13 -11   3 1793.56 675.658   2
 -13  11   3-264.881 608.398   1
  12 -11  -3 7493.76 1243.31   4
 -12 -11   3 6988.97 1085.85   2
 -12  11   3 10525.9 1516.40   1
 -11 -11   3 9261.45 1197.26   2
  11 -11  -3 6817.46 1210.32   4
 -10 -11   3 58764.1 2935.48   2
  10 -11  -3 57365.6 3296.39   4
 -10  11   3 61084.1 3325.82   1
  -9 -11   3 70952.0 3099.45   2
   9 -11  -3 66559.5 3399.11   4
  -9  11   3 74253.6 3518.30   1
   8 -11  -3 35273.1 2272.42   4
  -8 -11   3 33675.3 1898.04   2
  -8  11   3 34318.2 2239.54   1
  -7  11   3 528.130 374.093   1
  -7 -11   3 749.057 321.001   2
  -6 -11   3 17946.6 1180.47   2
  -6  11   3 19254.3 1528.28   1
  -5  11   3 88524.5 3467.74   1
  -5 -11   3 90727.9 2841.54   2
  -4  11   3 129644. 4272.46   1
   4 -11  -3 134118. 4309.19   2
  -4 -11   3 127663. 3471.79   2
  -3 -11   3 58296.1 1954.33   2
   3 -11  -3 59229.4 2616.54   2
   2  11  -3 31427.6 1339.26   2
   2 -11  -3 33656.7 1843.09   2
  -2 -11   3 29501.5 1272.98   2
  -2  11   3 31740.5 1613.23   4
  -1  11   3 1046.28 302.777   4
   1 -11  -3 350.780 276.829   2
  -1 -11   3 867.254 221.976   2
   1  11  -3 828.971 222.016   2
   0  11  -3 35302.6 1404.70   2
   0  11   3 34481.0 1584.35   4
   0 -11  -3 37320.8 1941.39   2
  -1  11  -3 73597.3 2293.69   1
  -1 -11  -3 75248.5 2885.80   2
  -2  11  -3 90466.4 2668.42   1
  -2  11  -3 80114.1 2558.47   2
  -2 -11  -3 84390.5 3188.16   2
  -3 -11  -3 39015.2 2040.65   2
  -3  11  -3 36499.2 1608.33   1
  -3  11  -3 32940.7 1558.00   2
  -4 -11  -3 3139.79 586.467   2
  -4  11  -3 1943.89 338.487   1
  -5 -11  -3 29360.0 1891.30   2
  -5  11  -3 26849.1 1544.24   1
  -6 -11  -3 35776.3 2232.50   2
  -6  11  -3 40079.6 2036.35   1
  -7  11  -3 75855.7 3127.89   1
  -7 -11  -3 74660.7 3438.45   2
  -8  11  -3 95518.8 3775.99   1
  -8 -11  -3 93733.7 4060.54   2
  -9 -11  -3 26737.3 2147.76   2
  -9  11  -3 30242.0 2080.79   1
 -10 -11  -3 3271.30 792.513   2
 -10  11  -3 3098.63 814.547   1
 -11  11  -3 3206.51 808.299   1
 -11 -11  -3 2890.12 776.068   2
 -12  11  -3 26830.3 2252.86   1
 -12 -11  -3 27484.1 2483.19   2
 -13 -11  -3 46014.3 3342.57   2
 -13  11  -3 42463.0 2964.49   1
 -14  11  -3 30617.7 2576.59   1
 -16 -12   3 462.136 481.704   2
 -15 -12   3 3547.01 865.009   2
 -15  12   3 2967.38 961.059   1
 -14  12   3 16923.4 2032.45   1
  14 -12  -3 16524.0 2095.07   4
 -14 -12   3 19144.3 1999.02   2
  13 -12  -3 27022.2 2603.04   4
 -13 -12   3 31412.6 2475.46   2
  12 -12  -3 34372.8 2767.13   4
 -12  12   3 37754.7 2865.79   1
 -12 -12   3 37434.0 2573.37   2
  11 -12  -3 10646.8 1460.60   4
 -11 -12   3 9563.38 1272.28   2
 -11  12   3 10560.4 1416.90   1
 -10  12   3 1469.53 699.902   1
  10 -12  -3 330.688 365.309   4
 -10 -12   3 1867.35 577.912   2
  -9  12   3 7482.61 1088.19   1
  -9 -12   3 5582.73 848.256   2
   9 -12  -3 7282.10 1121.19   4
  -8  12   3 28365.1 2043.00   1
  -8 -12   3 28065.6 1735.35   2
  -7  12   3 63643.7 3066.06   1
  -7 -12   3 61449.0 2550.20   2
  -6 -12   3 45173.8 2008.69   2
  -6  12   3 44049.9 2442.08   1
  -5 -12   3 18989.1 1178.59   2
  -5  12   3 18515.1 1496.99   1
  -4 -12   3 850.774 198.499   2
   4 -12  -3 1501.78 559.247   2
  -4  12   3 905.197 277.624   1
   3  12  -3 56989.4 2085.41   2
   3 -12  -3 57427.8 2613.38   2
   2  12  -3 103915. 2976.87   2
   2 -12  -3 102826. 3637.43   2
  -2 -12   3 97077.7 2852.94   2
  -1 -12   3 79417.9 2472.73   2
   1 -12  -3 84868.6 3194.13   2
  -1  12   3 83137.2 2848.39   4
   1  12  -3 75140.2 2412.32   2
   0  12  -3 51951.4 1864.91   2
   0  12   3 49529.4 2059.29   4
   0 -12  -3 48914.1 2374.04   2
  -1  12  -3 11308.6 801.718   2
  -1  12  -3 11168.5 835.216   1
  -1 -12  -3 10440.0 1020.44   2
  -2  12  -3 2609.32 401.624   2
  -2 -12  -3 1989.91 457.870   2
  -2  12  -3 1807.77 338.467   1
  -3 -12  -3 40903.8 2205.22   2
  -3  12  -3 39064.6 1742.40   1
  -4 -12  -3 84599.2 3445.44   2
  -4  12  -3 85675.1 2937.29   1
  -5 -12  -3 113010. 4212.28   2
  -5  12  -3 114174. 3689.49   1
  -6  12  -3 64569.6 2734.96   1
  -6 -12  -3 62711.0 3085.16   2
  -7 -12  -3 6655.01 1001.34   2
  -7  12  -3 7069.86 892.394   1
  -8 -12  -3 3604.40 783.475   2
  -8  12  -3 3077.02 668.006   1
  -9  12  -3 31365.0 2164.28   1
  -9 -12  -3 33094.4 2415.73   2
 -10 -12  -3 16940.0 1778.19   2
 -10  12  -3 18998.7 1754.96   1
 -11  12  -3 34093.5 2505.18   1
 -11 -12  -3 35877.8 2723.76   2
 -12 -12  -3 15484.7 1876.30   2
 -12  12  -3 15333.4 1730.05   1
 -13 -12  -3 2090.70 890.944   2
 -13  12  -3 1731.21 736.341   1
 -16 -13   3 3232.92 935.805   2
 -15 -13   3 4021.60 1063.59   2
  14 -13  -3 1244.73 665.158   4
 -14 -13   3 1397.77 554.044   2
 -14  13   3 1733.01 793.625   1
 -13 -13   3 201.378 355.820   2
  13 -13  -3-243.724 331.952   4
 -12 -13   3 23829.9 2073.75   2
  12 -13  -3 22496.5 2258.70   4
 -12  13   3 25809.0 2354.57   1
 -11 -13   3 38024.6 2475.88   2
 -11  13   3 39336.2 2836.98   1
 -10 -13   3 28411.9 1999.75   2
 -10  13   3 26173.3 2198.51   1
  -9 -13   3 13039.3 1261.46   2
  -9  13   3 11324.1 1385.06   1
  -8  13   3 2647.74 647.473   1
  -8 -13   3 5131.72 769.529   2
  -7  13   3 1681.15 581.364   1
  -7 -13   3 2158.99 456.063   2
  -6 -13   3 20423.5 1335.82   2
  -6  13   3 21728.0 1717.23   1
  -5  13   3 24280.3 1797.40   1
  -5 -13   3 23766.1 1374.96   2
  -4 -13   3 51122.1 2033.56   2
   4 -13  -3 53378.5 2645.67   2
  -4  13   3 54571.3 2677.39   1
   3  13  -3 29398.3 1505.19   2
  -3 -13   3 31032.7 1480.74   2
   3 -13  -3 31907.0 1969.52   2
   2  13  -3 1157.07 305.237   2
  -2 -13   3 619.523 200.569   2
   1  13  -3 2059.42 346.204   2
  -1 -13   3 1363.40 325.432   2
   1 -13  -3 1812.31 510.074   2
   0  13  -3 5502.32 587.841   2
   0 -13  -3 5447.75 783.634   2
  -1  13  -3 16172.3 1027.60   2
  -1  13  -3 17126.3 1099.16   1
  -1 -13  -3 17705.6 1421.02   2
  -2  13  -3 39643.0 1789.32   1
  -2 -13  -3 40387.2 2225.03   2
  -3  13  -3 25094.9 1418.17   1
  -3 -13  -3 24175.7 1721.34   2
  -4 -13  -3 17506.2 1451.79   2
  -4  13  -3 15944.9 1166.89   1
  -5 -13  -3 11320.4 1220.77   2
  -5  13  -3 12093.6 1060.55   1
  -6 -13  -3 7776.48 1059.40   2
  -6  13  -3 7091.80 876.474   1
  -7 -13  -3 25962.5 2022.74   2
  -7  13  -3 25100.6 1759.77   1
  -8  13  -3 28973.6 1995.28   1
  -8 -13  -3 29367.1 2234.90   2
  -9 -13  -3 5483.28 994.517   2
  -9  13  -3 6867.21 1042.44   1
 -10 -13  -3 2970.45 794.644   2
 -10  13  -3 2023.62 579.786   1
 -11  13  -3-390.051 340.495   1
 -11 -13  -3 863.905 565.654   2
 -12 -13  -3 5528.46 1161.62   2
 -15 -14   3 365.336 385.025   2
 -14 -14   3 1707.79 594.925   2
 -14  14   3 1045.23 643.957   1
 -13 -14   3 586.610 358.979   2
 -13  14   3 1325.60 727.585   1
 -12 -14   3 215.145 336.608   2
 -12  14   3-338.389 629.048   1
 -11  14   3 293.997 446.237   1
 -11 -14   3 736.867 384.986   2
 -10 -14   3 207.714 275.413   2
 -10  14   3 322.570 444.226   1
  -9  14   3 2043.42 762.635   1
  -9 -14   3 1365.24 417.632   2
  -8 -14   3-69.6345 303.911   2
  -8  14   3 444.302 485.318   1
  -7 -14   3 963.040 330.526   2
  -7  14   3 1010.91 432.631   1
  -6  14   3-371.496 347.385   1
  -6 -14   3-74.3292 238.239   2
  -5 -14   3-255.293 297.151   2
  -5  14   3 107.701 398.576   1
  -4  14   3-249.159 327.919   1
  -4 -14   3 208.018 151.046   2
   3 -14  -3 663.042 373.363   2
  -3 -14   3 780.847 222.733   2
   2  14  -3 5325.11 610.754   2
   2 -14  -3 3728.42 692.410   2
  -2 -14   3 4757.63 585.736   2
   1  14  -3 1613.62 333.400   2
  -1 -14   3 1918.09 402.403   2
   1 -14  -3 964.395 310.687   2
   0  14  -3 345.781 137.833   2
   0 -14  -3 512.954 271.258   2
  -1  14  -3 704.403 279.105   1
  -1 -14  -3 789.779 381.075   2
  -2  14  -3 7154.21 756.573   1
  -2 -14  -3 8375.81 1016.41   2
  -3  14  -3 28095.5 1564.34   1
  -3 -14  -3 25454.7 1838.39   2
  -4  14  -3 8276.36 857.185   1
  -4 -14  -3 9359.08 1138.45   2
  -5  14  -3 1615.18 414.643   1
  -5 -14  -3 1036.29 460.996   2
  -6  14  -3 6523.64 888.046   1
  -6 -14  -3 6727.32 1018.20   2
  -7 -14  -3 5714.56 957.959   2
  -7  14  -3 6632.71 935.325   1
  -8 -14  -3 162.185 334.557   2
  -8  14  -3 335.403 368.914   1
  -9 -14  -3-87.9289 326.398   2
  -9  14  -3 532.938 430.846   1
 -10  14  -3-425.932 474.632   1
 -10 -14  -3-343.551 554.768   2
 -11 -14  -3 1444.06 609.777   2
 -12 -14  -3 436.345 435.328   2
 -13  15   3 823.244 621.824   1
 -13 -15   3-486.734 647.021   2
 -12 -15   3 555.089 309.376   2
 -12  15   3 267.738 555.671   1
 -11  15   3 8063.59 1348.76   1
 -11 -15   3 8515.54 1175.74   2
 -10 -15   3 27891.8 2042.50   2
 -10  15   3 29940.4 2493.57   1
  -9 -15   3 29728.2 2003.15   2
  -9  15   3 30212.6 2369.75   1
  -8 -15   3 18434.4 1469.02   2
  -8  15   3 19954.2 1859.38   1
  -7 -15   3 4098.02 671.473   2
  -7  15   3 2603.43 658.306   1
  -6  15   3 730.778 436.299   1
  -6 -15   3 602.965 322.275   2
  -5 -15   3 3957.08 621.740   2
  -5  15   3 3987.57 785.280   1
  -4  15   3 3807.24 752.135   1
  -4 -15   3 3433.17 537.628   2
   3 -15  -3 317.700 375.137   2
  -3 -15   3 476.384 221.166   2
   2 -15  -3-285.401 368.126   2
  -2 -15   3 513.821 253.410   2
  -1 -15   3 213.392 226.024   2
   1 -15  -3-233.189 381.839   2
   0 -15  -3 3462.86 700.649   2
  -1  15  -3 15800.5 1166.85   1
  -1 -15  -3 16016.8 1453.73   2
  -2  15  -3 19108.9 1308.38   1
  -2 -15  -3 18930.0 1585.86   2
  -3  15  -3 13633.5 1105.53   1
  -3 -15  -3 14305.0 1387.97   2
  -4 -15  -3 4424.88 766.329   2
  -4  15  -3 3200.26 569.599   1
  -5  15  -3 325.613 293.461   1
  -5 -15  -3 504.559 333.718   2
  -6 -15  -3 9440.09 1210.54   2
  -6  15  -3 11308.7 1149.87   1
  -7  15  -3 11312.3 1205.35   1
  -7 -15  -3 10091.9 1321.67   2
  -8 -15  -3 15107.9 1664.87   2
  -8  15  -3 15114.3 1480.95   1
  -9  15  -3 7401.24 1082.66   1
  -9 -15  -3 7890.19 1275.77   2
 -10 -15  -3 566.495 348.184   2
 -11 -15  -3 3356.28 952.269   2
 -12  16   3 13320.4 1805.15   1
 -11  16   3 9098.26 1454.31   1
 -11 -16   3 10308.5 1298.26   2
 -10 -16   3 2267.96 647.729   2
 -10  16   3 2498.30 769.385   1
  -9 -16   3 8655.21 1072.64   2
  -9  16   3 10019.8 1403.47   1
  -8 -16   3 45538.9 2419.79   2
  -8  16   3 43886.7 2902.83   1
  -7  16   3 50639.1 3001.85   1
  -7 -16   3 49497.5 2443.69   2
  -6 -16   3 16467.3 1305.97   2
  -6  16   3 17854.8 1695.12   1
  -5  16   3 2865.24 709.194   1
  -5 -16   3 2981.51 509.685   2
  -4  16   3 4247.66 838.930   1
  -4 -16   3 3287.97 536.231   2
  -3  16   3 22604.1 1823.39   1
   3 -16  -3 22824.7 1825.51   2
  -3 -16   3 20438.9 1343.72   2
  -2 -16   3 51756.3 2239.61   2
   2 -16  -3 50311.0 2740.99   2
  -1 -16   3 49542.7 2174.85   2
   1 -16  -3 47167.0 2653.02   2
   0 -16  -3 32538.0 2158.79   2
  -1 -16  -3 16648.7 1548.83   2
  -1  16  -3 16779.9 1262.02   1
  -2  16  -3-338.804 305.323   1
  -2 -16  -3-2089.45 589.689   2
  -3  16  -3 26969.2 1654.97   1
  -3 -16  -3 25684.4 1953.71   2
  -4  16  -3 35365.1 1973.83   1
  -4 -16  -3 34301.5 2310.85   2
  -5  16  -3 28932.9 1839.74   1
  -5 -16  -3 27065.6 2073.48   2
  -6 -16  -3 21968.8 1920.33   2
  -6  16  -3 22132.3 1665.13   1
  -7 -16  -3 3061.50 762.432   2
  -7  16  -3 3936.78 756.318   1
  -8 -16  -3 3550.94 756.278   2
  -9 -16  -3 32159.3 2571.83   2
 -10 -16  -3 31304.4 2669.95   2
 -11 -16  -3 26398.4 2520.62   2
 -11  17   3 19148.9 2096.75   1
 -10  17   3 35722.9 2831.07   1
  -9  17   3 28603.6 2446.15   1
  -8  17   3 6700.75 1119.69   1
  -8 -17   3 9800.36 1128.34   2
  -7 -17   3 199.093 239.677   2
  -7  17   3 240.236 359.856   1
  -6  17   3 14743.1 1615.65   1
  -6 -17   3 14502.4 1238.94   2
  -5  17   3 53090.8 3043.85   1
  -5 -17   3 48767.6 2349.53   2
  -4  17   3 105223. 4387.32   1
  -4 -17   3 99366.2 3502.23   2
  -3  17   3 72193.8 3559.21   1
   3 -17  -3 72715.3 3504.78   2
  -3 -17   3 66208.8 2708.76   2
   2 -17  -3 13931.7 1430.78   2
  -2 -17   3 14332.2 1168.20   2
   1 -17  -3 2708.17 652.649   2
   0 -17  -3 37493.3 2400.24   2
  -1  17  -3 80512.8 3130.44   1
  -1 -17  -3 77640.4 3635.63   2
  -2 -17  -3 85550.9 3861.45   2
  -2  17  -3 91312.2 3394.22   1
  -3  17  -3 46161.4 2296.39   1
  -3 -17  -3 39112.0 2530.35   2
  -4 -17  -3 6847.43 1043.86   2
  -4  17  -3 5923.86 825.062   1
  -5 -17  -3 636.665 377.013   2
  -5  17  -3 632.506 267.181   1
  -6 -17  -3 14129.6 1604.80   2
  -7 -17  -3 33785.4 2516.51   2
  -8 -17  -3 53294.5 3339.44   2
  -9 -17  -3 18205.2 1984.25   2
 -10 -17  -3 630.731 437.779   2
 -11  18   3 4973.12 1108.90   1
 -10  18   3 24.7855 413.919   1
  -9  18   3 16482.4 1925.31   1
  -8  18   3 44754.2 3043.01   1
  -7  18   3 60792.4 3494.44   1
  -6  18   3 43775.0 2907.74   1
  -5  18   3 15351.3 1657.48   1
  -4  18   3 676.794 525.933   1
  -4 -18   3 928.148 435.010   2
  -3  18   3 21536.2 1880.51   1
   3 -18  -3 21481.4 1870.62   2
   2 -18  -3 37928.4 2528.00   2
  -2 -18   3 36329.2 1983.07   2
   1 -18  -3 62909.4 3267.90   2
   0 -18  -3 33372.5 2286.03   2
  -1  18  -3 6523.09 857.543   1
  -1 -18  -3 5625.40 978.705   2
  -2  18  -3 2338.52 530.352   1
  -2 -18  -3 1551.75 527.379   2
  -3  18  -3 30619.0 1915.43   1
  -3 -18  -3 29202.6 2216.83   2
  -4 -18  -3 61350.7 3344.67   2
  -5 -18  -3 65201.7 3514.93   2
  -6 -18  -3 35734.6 2627.52   2
  -7 -18  -3 5169.25 1051.27   2
  -8 -18  -3 1553.11 637.734   2
  -9 -18  -3 13852.3 1791.56   2
  -9  19   3 17677.5 2021.83   1
  -8  19   3 3690.52 946.081   1
  -7  19   3 1118.58 592.693   1
  -6  19   3 11687.9 1532.31   1
  -5  19   3 22130.6 2031.74   1
  -4  19   3 27138.4 2209.70   1
  -3  19   3 21018.3 1940.78   1
   3 -19  -3 22757.2 1995.93   2
   2 -19  -3 4330.52 934.523   2
   1 -19  -3 1242.41 378.218   2
   0 -19  -3 25189.0 2062.09   2
  -1  19  -3 48019.4 2473.10   1
  -1 -19  -3 45044.8 2813.15   2
  -2 -19  -3 47195.6 2911.26   2
  -3 -19  -3 20731.7 1922.59   2
  -4 -19  -3 6252.33 1097.24   2
  -5 -19  -3 405.080 394.634   2
  -6 -19  -3 5532.61 1084.08   2
  -7 -19  -3 37484.9 2823.46   2
  -8 -19  -3 44380.2 3165.68   2
  -8  20   3 9026.77 1411.26   1
  -7  20   3 17263.9 1940.72   1
  -6  20   3 10163.7 1459.47   1
  -5  20   3 2207.53 675.717   1
  -4  20   3 210.934 396.392   1
  -3  20   3 2605.53 649.707   1
   2 -20  -3 11613.9 1477.12   2
   1 -20  -3 12451.0 1486.26   2
   0 -20  -3 9752.81 1349.76   2
  -1 -20  -3 4015.09 878.722   2
  -2 -20  -3-277.094 428.418   2
  -3 -20  -3 8554.33 1307.20   2
  -4 -20  -3 10864.1 1514.70   2
  -5 -20  -3 8945.17 1368.38   2
  -6 -20  -3 4472.21 1009.77   2
  -7 -20  -3 126.826 442.413   2
  -6  21   3 2399.00 868.501   1
  -5  21   3 254.536 374.496   1
  -4  21   3-100.585 453.351   1
  -3  21   3 948.439 396.884   1
   2 -21  -3 181.368 465.993   2
  -2  21   3 238.020 460.710   1
   1 -21  -3 1173.93 541.102   2
   0 -21  -3 1353.45 495.079   2
  -1 -21  -3 2163.01 664.008   2
  -2 -21  -3 759.505 565.371   2
  -3 -21  -3-137.466 380.565   2
  -4 -21  -3 23.2613 362.620   2
  -5 -21  -3-45.5992 355.927   2
  -3  22   3 5474.13 1101.00   1
   2 -22  -3 7754.68 1285.82   2
  -2  22   3 7772.40 1273.25   1
   1 -22  -3 9455.84 1428.20   2
   0 -22  -3 4231.14 961.996   2
  -1 -22  -3 1676.46 696.767   2
  -2 -22  -3 343.386 526.036   2
  -3 -22  -3 7889.79 1288.88   2
  -4 -22  -3 10780.0 1523.27   2
 -17   0   4 4829.89 1213.57   1
 -16   0   4-213.042 779.551   1
 -15   0   4 20722.6 2278.58   1
 -14   0   4 44660.1 3203.71   1
 -13   0   4 56639.6 2365.42   3
 -13   0   4 56933.3 3517.15   1
 -12   0   4 122994. 3911.10   3
 -12   0   4 123062. 5196.25   1
 -11   0   4 43357.2 2146.91   3
 -11   0   4 42683.7 2796.62   1
 -10   0   4 1062.84 540.449   1
  -9   0   4 60273.9 3016.85   1
  -8   0   4 103390. 3925.97   1
  -7   0   4 148252. 4667.50   1
   6   0  -4 59550.2 2340.08   1
  -6   0   4 61269.8 2518.08   1
   5   0  -4 16516.7 1050.64   1
  -5   0   4 17956.2 1173.15   1
  -4   0   4 8911.80 725.991   1
  -4   0   4 7819.85 582.886   2
  -3   0   4 2882.29 369.335   1
  -3   0   4 2794.32 305.227   2
   3   0  -4 2706.83 328.933   1
  -2   0   4 43576.7 1405.53   1
   2   0  -4 46300.3 1368.46   2
  -2   0   4 43677.8 1344.35   2
  -1   0   4 159269. 3547.98   2
  -1   0   4 157195. 3511.92   1
   1   0  -4 169320. 3550.80   2
   0   0  -4 56729.3 1618.35   2
   0   0   4 54132.6 1627.75   2
  -1   0  -4 1941.98 281.402   2
  -2   0  -4 253377. 5207.79   4
  -2   0  -4 247338. 5545.11   2
  -3   0  -4 172952. 4027.93   4
  -3   0  -4 175400. 4367.17   2
   4   0   4 387968. 8223.00   3
   4   0   4 376271. 8154.18   1
   5   0   4 185473. 5048.41   1
   5   0   4 194635. 4688.79   3
   6   0   4 29316.0 1767.57   1
   6   0   4 28061.8 1447.74   4
   6   0   4 30932.3 1331.27   3
   7   0   4 2270.99 424.148   4
   8   0   4 28287.0 1674.58   4
   9   0   4 80956.2 3203.60   4
  10   0   4 309274. 8130.02   4
  11   0   4 157265. 5319.18   4
  12   0   4 29719.8 2129.14   4
  13   0   4 203.860 409.199   4
  14   0   4 9568.91 1307.70   4
  15   0   4 29123.3 2399.94   4
  16   0   4 41825.9 3031.18   4
  17  -1  -4 15721.5 2188.97   4
 -17   1   4 18098.4 2197.96   1
 -16   1   4 26882.3 2683.88   1
 -16  -1   4 28703.3 2718.92   1
 -15  -1   4 18860.9 2152.64   1
 -15   1   4 23030.1 2357.52   1
 -14   1   4 4759.04 1074.09   1
 -14  -1   4 5284.06 1053.34   1
 -13   1   4 1065.25 295.845   3
 -13  -1   4 523.026 228.054   3
 -13   1   4 362.530 519.724   1
 -13  -1   4 768.470 539.434   1
 -12  -1   4 8661.73 865.975   3
 -12  -1   4 6757.22 1112.99   1
 -11  -1   4 127358. 4045.52   3
 -11  -1   4 134345. 5275.93   1
 -11   1   4 133488. 5236.00   1
 -10  -1   4 88177.7 3271.63   3
 -10  -1   4 100725. 4230.78   1
 -10   1   4 92894.7 4040.55   1
  -9   1   4 79397.6 3551.88   1
  -9  -1   4 83546.1 3153.19   3
  -9  -1   4 81927.7 3667.22   1
  -8   1   4 22389.0 1672.81   1
  -8  -1   4 24254.3 1613.23   3
  -8  -1   4 22029.4 1687.75   1
  -7   1   4 5745.23 799.823   1
  -7  -1   4 5360.77 765.444   1
  -6  -1   4 135311. 4208.40   1
   6  -1  -4 131221. 3919.17   1
  -6   1   4 140354. 4151.00   1
   6   1  -4 130535. 3912.81   1
  -5  -1   4 396277. 8915.32   1
   5  -1  -4 393694. 8622.61   1
  -5   1   4 409821. 8819.28   1
   5   1  -4 392921. 8599.01   1
   4  -1  -4 220475. 5119.37   1
   4   1  -4 213104. 5005.97   1
  -4  -1   4 224836. 5292.11   1
  -4   1   4 217247. 4933.67   2
  -4   1   4 216574. 5176.86   1
  -3   1   4 287467. 6197.43   1
   3  -1  -4 281304. 6146.86   1
  -3  -1   4 285221. 6190.36   1
  -3  -1   4 292026. 5796.19   2
  -3   1   4 288255. 6047.44   2
   3   1  -4 281789. 6003.72   1
  -2   1   4 33380.6 1259.79   1
   2   1  -4 36914.2 1156.33   1
   2  -1  -4 35875.2 1257.07   2
  -2  -1   4 37184.6 1224.71   1
  -2  -1   4 35565.3 1069.42   2
  -2   1   4 35136.7 1242.48   2
  -1   1   4 39614.3 1341.50   2
  -1  -1   4 40066.4 1139.29   1
   1   1  -4 39444.1 1118.84   2
   1  -1  -4 38081.1 1298.24   2
  -1  -1   4 38406.5 1134.94   2
   0  -1  -4 183981. 4174.17   2
   0   1  -4 184657. 3927.64   2
   0   1   4 188256. 4228.47   2
   0  -1   4 191261. 4019.51   2
  -1  -1  -4 258926. 5669.85   2
   1   1   4 269580. 5796.76   2
  -1  -1  -4 261929. 5128.21   4
  -1   1  -4 265046. 5489.95   2
   2  -1   4 66820.4 2477.54   3
  -2   1  -4 64553.8 1890.36   4
  -2  -1  -4 65234.9 2086.19   2
  -2   1  -4 60284.0 1948.52   2
  -2  -1  -4 65858.6 1695.05   4
  -3   1  -4 27846.0 1180.62   4
   3  -1   4 27201.7 1434.22   3
   3  -1   4 27694.3 1251.35   1
  -3  -1  -4 25485.4 1305.40   2
  -4   1  -4 696.095 249.913   4
   4  -1   4 631.739 235.756   3
   4   1   4 315.156 122.923   4
   4  -1   4 854.182 287.630   1
   5   1   4 18807.0 1016.38   4
   5  -1   4 18311.5 1075.90   4
   5  -1   4 17591.9 1034.51   3
   5   1   4 19101.4 1289.09   1
   5  -1   4 19075.1 1290.57   1
   6  -1   4 128750. 3777.07   4
   6   1   4 135626. 3565.39   3
   6   1   4 127778. 3641.39   4
   6  -1   4 134618. 4291.42   1
   7   1   4 136334. 4063.23   4
   7  -1   4 139270. 4218.94   4
   8  -1   4 21196.7 1447.13   4
   8   1   4 22062.8 1432.47   4
   9  -1   4 57262.3 2667.69   4
   9   1   4 59512.7 2636.07   4
  10   1   4 489.012 391.959   4
  10  -1   4 75.2986 395.639   4
  11   1   4 30997.6 2059.36   4
  11  -1   4 30115.6 2079.25   4
  12   1   4 78764.3 3603.01   4
  12  -1   4 76375.4 3650.75   4
  13  -1   4 46700.2 2881.09   4
  13   1   4 50990.6 2916.33   4
  14   1   4 18317.6 1787.08   4
  14  -1   4 19633.1 1914.41   4
  15   1   4 11494.8 1486.31   4
  15  -1   4 9497.20 1421.62   4
  16   1   4 1382.51 684.124   4
  16  -1   4 826.172 547.709   4
  17  -2  -4-1016.92 682.853   4
 -17   2   4-232.351 541.913   1
  16  -2  -4 6040.20 1405.92   4
 -16   2   4 3937.19 1106.36   1
  15  -2  -4 15680.6 1997.31   4
 -15  -2   4 16721.2 2038.44   1
 -15   2   4 18944.7 2135.24   1
 -14  -2   4 19587.7 2085.82   1
 -14   2   4 20698.8 2166.07   1
 -13  -2   4 24081.7 2234.46   1
 -13   2   4 26322.6 2352.70   1
 -12  -2   4 29504.6 1602.50   3
 -12  -2   4 29463.3 2374.25   1
 -12   2   4 32588.5 2542.40   1
 -11  -2   4 5312.10 654.651   3
 -11   2   4 5642.22 1020.08   1
 -11  -2   4 7103.48 1122.45   1
 -10  -2   4 11552.1 1364.81   1
 -10   2   4 11515.5 1341.98   1
 -10  -2   4 11440.0 1024.82   3
  -9   2   4 39062.7 2348.57   1
  -9  -2   4 34817.3 1875.08   3
  -9  -2   4 34462.0 2277.05   1
  -8   2   4 45480.6 2403.53   1
  -8  -2   4 47920.7 2553.60   1
  -8  -2   4 42988.8 2146.58   3
  -7   2   4 42774.6 2147.78   1
  -7  -2   4 39186.2 2030.85   3
   7   2  -4 38174.7 1959.78   1
  -7  -2   4 40875.4 2193.87   1
  -6  -2   4 23268.4 1546.71   3
  -6   2   4 24222.9 1465.27   1
   6   2  -4 22809.3 1374.61   1
   6  -2  -4 22439.9 1366.83   1
  -6  -2   4 23490.9 1553.68   1
   5  -2  -4 11604.6 901.457   1
   5   2  -4 13077.6 919.760   1
  -5   2   4 13392.6 887.492   2
  -5   2   4 11523.0 951.462   1
  -5  -2   4 12783.0 998.995   1
  -5  -2   4 12226.0 1098.62   3
  -4  -2   4 7952.77 734.179   1
  -4   2   4 8133.18 690.035   1
  -4  -2   4 6551.15 852.669   3
  -4   2   4 7881.12 632.324   2
   4  -2  -4 8149.97 661.546   1
   4   2  -4 7757.18 628.240   1
  -3   2   4 508.353 211.760   1
  -3  -2   4 263.453 202.826   1
   3  -2  -4 285.337 156.319   2
  -3  -2   4 675.933 139.191   2
   3   2  -4 274.665 117.086   1
  -3   2   4 299.643 136.158   2
   2   2  -4 28655.5 946.710   1
  -2   2   4 28503.6 1167.71   2
   2  -2  -4 30081.5 1186.04   2
  -2  -2   4 28698.9 1066.28   1
  -2  -2   4 26691.4 1631.73   3
  -2   2   4 28262.0 1178.62   1
  -2  -2   4 29540.6 841.623   2
  -1   2   4 80626.7 2273.65   2
  -1  -2   4 79479.8 1857.16   1
  -1  -2   4 82498.4 1819.52   2
   1   2  -4 84068.6 1799.84   2
   1  -2  -4 77994.2 2240.30   2
   0  -2  -4 48293.5 1630.20   2
   0  -2   4 48438.9 1126.71   1
   0   2  -4 49347.7 1281.88   2
   0  -2   4 49516.7 2175.66   3
   0   2   4 49490.1 1668.77   2
  -1  -2  -4 10512.5 707.182   2
  -1   2  -4 9656.40 555.705   2
   1   2   4 10969.0 754.461   2
   1  -2   4 10880.4 936.757   3
  -2  -2  -4 139369. 3677.26   2
   2  -2   4 138528. 4027.01   3
   2  -2   4 146791. 3346.23   1
  -2   2  -4 141208. 3504.90   4
   3  -2   4 119514. 3441.92   3
  -3   2  -4 113745. 3074.69   4
   3   2   4 110321. 2585.80   4
  -3  -2  -4 113554. 3291.16   2
   3  -2   4 115930. 3104.52   1
  -4   2  -4 76949.2 2466.33   4
   4   2   4 74881.7 2078.18   4
   4  -2   4 72861.6 2518.79   1
   4  -2   4 75745.0 2498.73   3
   5   2   4 85554.4 2548.68   4
  -5   2  -4 91197.1 2946.30   4
  -5  -2  -4 87617.7 3100.95   2
   5  -2   4 94602.2 3158.49   1
   6  -2   4 55239.1 2465.45   1
  -6  -2  -4 52726.5 2469.96   2
   6   2   4 53576.6 2011.94   4
   6  -2   4 52791.8 2168.69   4
   7   2   4 158.445 222.808   4
   7   2   4 88.4519 144.819   3
   7  -2   4-240.484 237.838   4
   8  -2   4 10.8924 212.929   4
   8   2   4 251.516 116.903   3
   9  -2   4 1423.63 476.478   4
   9   2   4 1049.71 368.564   4
  10   2   4 15680.9 1348.07   4
  10  -2   4 16931.9 1481.55   4
  11  -2   4 31196.8 2160.14   4
  11   2   4 34349.6 2139.55   4
  12  -2   4 10219.5 1267.23   4
  12   2   4 9974.28 1190.18   4
  13   2   4-58.7542 295.574   4
  13  -2   4-218.851 307.410   4
  14   2   4 2055.33 628.037   4
  14  -2   4 626.020 351.131   4
  15  -2   4 12437.8 1626.42   4
  15   2   4 11181.3 1466.57   4
  16   2   4 11130.1 1528.05   4
  16  -2   4 13436.7 1730.72   4
  17  -3  -4 3329.25 1104.85   4
 -17   3   4 1518.39 620.746   1
 -16   3   4 4230.25 1151.34   1
  16  -3  -4 3416.08 972.588   4
 -15   3   4 1823.83 765.598   1
  15  -3  -4 1701.87 850.448   4
 -14   3   4 1656.56 770.316   1
  14  -3  -4 626.809 674.667   4
 -13   3   4 710.534 718.796   1
 -13  -3   4-821.318 734.576   1
  13  -3  -4 1576.77 883.147   4
 -12   3   4 4908.33 1016.82   1
 -12  -3   4 3518.82 824.395   1
 -11   3   4 1604.36 707.181   1
 -11  -3   4 2049.11 733.277   1
 -10   3   4 7852.25 1114.28   1
 -10  -3   4 6858.76 1076.17   1
 -10  -3   4 6108.54 744.388   3
  -9  -3   4 4446.27 628.965   3
  -9   3   4 4808.31 851.511   1
  -9  -3   4 5790.02 911.988   1
  -8  -3   4 1111.35 246.197   3
  -8   3   4 1171.92 449.920   1
  -8  -3   4 1389.54 531.083   1
  -7  -3   4 3573.89 671.140   1
  -7   3   4 4052.65 662.932   1
  -7  -3   4 3688.75 620.520   3
   7   3  -4 3244.70 590.856   1
   6   3  -4 21235.4 1349.68   1
  -6  -3   4 23104.8 1503.40   3
  -6   3   4 24638.9 1349.74   2
  -6   3   4 20684.6 1374.93   1
  -6  -3   4 25447.8 1569.76   1
  -5  -3   4 5518.27 688.257   1
   5  -3  -4 5316.86 597.896   1
  -5  -3   4 6033.42 748.385   3
  -5   3   4 5546.25 597.049   2
   5   3  -4 6182.91 637.469   1
  -5   3   4 6126.97 679.416   1
  -4  -3   4 34878.4 1865.80   3
   4   3  -4 36920.1 1486.50   1
  -4   3   4 37499.0 1612.13   1
  -4   3   4 35671.9 1498.72   2
  -4  -3   4 35621.7 1600.09   1
  -3   3   4 30809.7 1366.80   1
   3  -3  -4 33134.4 1368.71   2
  -3  -3   4 29327.1 1672.09   3
   3   3  -4 30690.0 1170.21   1
  -3  -3   4 30004.0 1291.27   1
  -3   3   4 31958.9 1349.04   2
  -2  -3   4 2512.09 282.940   1
  -2   3   4 1506.54 271.490   2
   2   3  -4 1828.85 214.631   1
  -2  -3   4 2222.86 471.844   3
   2  -3  -4 1845.33 297.317   2
   1  -3  -4 300.939 203.908   2
  -1   3   4-92.4475 143.912   2
  -1  -3   4 561.902 291.892   3
   0  -3   4 1374.84 334.272   3
   0   3   4 823.070 216.309   2
   0   3  -4 1356.58 147.541   2
   0  -3  -4 1213.29 270.916   2
  -1  -3  -4 9088.07 699.735   2
   1   3   4 10196.3 757.678   2
   1  -3   4 10654.4 919.430   3
   2  -3   4 5883.28 433.572   1
   2   3   4 5617.16 597.013   2
   2  -3   4 5364.52 618.848   3
  -2  -3  -4 5255.92 565.137   2
   3  -3   4 22925.3 1096.84   1
  -3  -3  -4 21766.8 1244.34   2
  -3   3  -4 24042.3 1210.28   4
   3  -3   4 26634.1 1400.29   3
   3   3   4 23679.7 806.958   4
   4   3   4 2214.41 288.477   4
  -4   3  -4 2235.86 389.503   4
   4  -3   4 1326.54 295.168   1
  -4  -3  -4 1756.83 435.632   2
   5  -3   4 10019.0 887.350   1
  -5  -3  -4 9309.02 906.428   2
   5   3   4 9108.58 663.190   4
  -5   3  -4 9503.89 855.894   4
   6   3   4 2073.84 381.498   4
   6  -3   4 2318.63 461.514   1
  -6  -3  -4 1907.80 441.940   2
   7   3   4 2840.80 488.357   4
   7  -3   4 3088.69 530.856   4
  -7  -3  -4 3789.05 612.585   2
   7  -3   4 3927.86 694.015   1
   8   3   4 29091.1 1636.15   4
   8  -3   4 27566.5 1741.27   4
  -8  -3  -4 26403.4 1900.48   2
   9   3   4 2637.00 278.166   3
   9   3   4 1730.79 445.618   4
   9  -3   4 1755.92 498.203   4
  10   3   4 135.343 269.136   4
  10  -3   4-1063.82 445.900   4
  11   3   4 7158.64 966.900   4
  11  -3   4 5918.45 932.961   4
  12   3   4 2941.20 711.042   4
  12  -3   4 1120.18 451.980   4
  13   3   4 1679.84 581.556   4
  13  -3   4 691.035 379.600   4
  14  -3   4 725.966 466.439   4
  14   3   4 1279.48 582.482   4
  15   3   4-20.3261 356.720   4
  15  -3   4-307.386 499.814   4
 -15  -3  -4-179.298 497.699   2
  16  -3   4 103.607 389.100   4
 -17   4   4 2340.67 869.120   1
  17  -4  -4 2259.29 912.013   4
  16  -4  -4 334.799 672.520   4
 -16   4   4-748.304 545.702   1
 -15   4   4 2613.21 929.172   1
  15  -4  -4 2682.57 944.170   4
 -14   4   4 177.873 498.895   1
  14  -4  -4 92.1778 637.171   4
 -13   4   4 112.949 419.016   1
  13  -4  -4 435.876 527.070   4
 -12   4   4 12817.4 1610.52   1
  12  -4  -4 16280.7 1829.70   4
  11  -4  -4 5920.33 1144.03   4
 -11   4   4 4779.93 970.062   1
  10  -4  -4 3207.85 825.460   4
 -10   4   4 3579.01 775.832   1
 -10  -4   4 3034.68 747.343   1
  -9   4   4 3510.44 762.191   1
  -9  -4   4 2742.05 627.236   1
  -8  -4   4 5809.68 731.867   3
  -8  -4   4 6282.17 896.549   1
  -8   4   4 6849.19 868.803   1
  -7   4   4-625.167 429.230   1
  -7  -4   4-97.2767 355.245   3
  -7  -4   4 6.94964 347.739   1
  -6  -4   4 77.3673 353.367   3
   6   4  -4 648.820 305.217   1
  -6  -4   4 514.411 304.099   1
   5   4  -4 15925.6 1055.89   1
   5  -4  -4 15513.4 1107.22   1
  -5  -4   4 14608.9 1191.37   3
  -5   4   4 18289.7 1184.42   1
  -5  -4   4 15121.8 1090.86   1
  -5   4   4 15463.4 1039.22   2
  -4   4   4 322.875 182.224   1
  -4  -4   4-20.1792 314.303   3
   4   4  -4 188.916 129.998   1
  -4  -4   4 182.517 186.353   1
  -4   4   4 308.854 184.035   2
   3   4  -4 6413.94 517.267   1
  -3  -4   4 5551.83 687.329   3
  -3   4   4 7211.33 649.116   1
   3  -4  -4 7265.59 645.692   2
   3  -4  -4 7096.93 627.080   4
  -3   4   4 6907.23 627.050   2
   2   4  -4 13748.6 1121.56   3
  -2  -4   4 13714.7 1115.09   3
   2   4  -4 14640.1 633.523   1
   2  -4  -4 14677.6 742.513   4
   2  -4  -4 16267.4 952.468   2
  -2   4   4 15265.6 921.390   2
  -1   4   4 4289.72 488.391   2
   1  -4  -4 3830.77 443.978   2
   1  -4  -4 3719.63 265.803   4
  -1  -4   4 3768.02 578.200   3
   0  -4  -4 749.101 229.587   2
   0   4   4 1547.37 316.761   2
   0   4  -4 921.420 113.557   2
   0   4  -4 1783.12 454.026   3
   0  -4   4 811.177 263.644   3
  -1  -4  -4 9153.68 745.316   2
  -1   4  -4 11571.1 979.357   3
   1   4   4 9811.76 788.227   2
  -2  -4  -4 141426. 3890.94   2
  -2   4  -4 137791. 4219.17   3
   2   4   4 151409. 4064.82   2
   2  -4   4 145747. 3072.27   1
   3  -4   4 306.144 125.732   1
   3   4   4 599.257 134.861   4
  -3   4  -4 566.357 219.589   4
  -3  -4  -4-34.9734 200.742   2
  -3   4  -4 553.888 340.251   3
   4  -4   4 1463.48 286.290   1
   4   4   4 1009.00 214.053   4
  -4   4  -4 1118.39 344.118   3
  -4   4  -4 1708.44 359.401   4
  -4  -4  -4 987.610 341.187   2
  -5  -4  -4 11574.0 1042.78   2
   5  -4   4 12093.9 953.639   1
   5   4   4 13667.0 824.419   4
  -6  -4  -4 761.457 388.329   2
   6   4   4 700.327 318.024   4
   6  -4   4 547.708 257.017   1
  -7  -4  -4 10411.1 1142.55   2
   7  -4   4 9958.30 1025.29   1
   7   4   4 11638.6 947.137   4
   8  -4   4 10028.0 1037.83   4
  -8  -4  -4 11327.0 1248.89   2
   8   4   4 10125.3 961.159   4
   9  -4   4 831.844 347.895   4
   9   4   4 1158.84 424.099   4
  -9  -4  -4 801.087 439.743   2
  10  -4   4 17513.9 1551.08   4
 -10  -4  -4 15117.8 1650.55   2
  10   4   4 17758.0 1428.28   4
  11   4   4 9314.18 1099.25   4
 -11  -4  -4 8520.35 1282.74   2
  11  -4   4 9132.60 1161.86   4
 -12  -4  -4-53.2326 426.210   2
  12   4   4-312.757 383.120   4
  12  -4   4-627.472 460.101   4
  13   4   4 1255.75 533.395   4
  13  -4   4 1176.80 556.447   4
 -13  -4  -4 1380.51 611.091   2
  14  -4   4 91.8798 390.421   4
  14   4   4 421.012 510.615   4
 -14  -4  -4-493.576 535.058   2
  15  -4   4 991.040 471.919   4
  16  -4   4 4196.97 953.431   4
 -16   5   4 11979.0 1849.51   1
  16  -5  -4 12329.6 1854.55   4
 -15   5   4 7558.59 1406.59   1
  15  -5  -4 10868.0 1701.92   4
 -14   5   4 2327.06 847.339   1
  14  -5  -4 1802.42 720.097   4
 -13   5   4-63.6298 493.355   1
  13  -5  -4 203.627 560.891   4
  12  -5  -4 126.047 353.532   4
 -12   5   4 897.215 572.392   1
 -11   5   4 54252.8 3069.98   1
  11  -5  -4 48963.4 3115.17   4
 -10   5   4 6107.01 978.817   1
  10  -5  -4 5217.65 972.165   4
   9  -5  -4 12237.0 1351.11   4
  -9   5   4 10251.0 1191.62   1
  -8   5   4 10392.0 1097.74   1
   8  -5  -4 9062.67 1105.38   4
  -7   5   4 2760.64 516.834   1
   7  -5  -4 2601.77 614.329   4
  -6   5   4 46134.7 2140.59   1
   6   5  -4 44930.1 2085.82   1
   6  -5  -4 44186.3 2192.63   4
   5   5  -4 52921.5 2132.38   1
  -5   5   4 56369.6 2257.02   1
   5  -5  -4 52687.1 2241.85   4
   4   5  -4 8155.88 710.990   1
  -4   5   4 9033.50 816.576   1
   4  -5  -4 8867.58 771.533   4
   4   5  -4 10191.9 1008.00   3
  -4   5   4 8012.42 731.017   2
   3   5  -4 51212.2 1729.71   1
  -3  -5   4 51116.1 1267.13   2
   3   5  -4 57739.8 2431.22   3
   3  -5  -4 54281.7 1854.88   4
   3  -5  -4 56907.2 2080.91   2
  -3   5   4 58370.2 2080.70   2
  -3   5   4 56824.4 2105.69   1
  -2   5   4 652.244 222.975   2
   2  -5  -4 540.369 155.197   4
   2   5  -4 527.153 143.954   1
   2   5  -4 712.116 333.042   3
   2  -5  -4 1253.34 329.380   2
   1   5  -4 2541.22 501.854   3
  -1   5   4 2490.22 409.803   2
   1  -5  -4 2411.53 391.485   2
   0   5  -4 15870.3 1198.95   3
   0   5   4 15899.9 998.805   2
   0  -5  -4 14032.1 935.860   2
  -1  -5  -4 132127. 3698.83   2
  -1   5  -4 127779. 4026.72   3
   2  -5   4 22394.9 712.738   1
  -2  -5  -4 23995.1 1313.55   2
  -2   5  -4 22939.2 1435.29   3
   2   5   4 24868.6 1394.09   2
   3  -5   4 698.215 168.789   1
  -3  -5  -4 293.988 224.267   2
  -3   5  -4 411.292 156.920   4
  -3   5  -4 444.747 275.669   3
  -3   5  -4 488.088 161.413   1
  -4  -5  -4-135.747 255.943   2
   4  -5   4 161.060 122.457   1
  -4   5  -4-25.9093 173.609   1
  -5  -5  -4 10741.7 1010.04   2
  -5   5  -4 12294.9 1039.82   3
  -5   5  -4 10842.1 826.277   1
   5  -5   4 10869.2 864.569   1
  -6   5  -4 51109.6 2112.42   1
  -6  -5  -4 50687.5 2445.71   2
  -6   5  -4 51116.7 2246.50   3
   6  -5   4 48320.0 2157.37   1
  -7  -5  -4 24304.2 1762.82   2
   7  -5   4 21994.1 1524.49   1
   8   5   4 2015.60 562.590   4
  -8  -5  -4 1275.24 582.405   2
   9   5   4 41864.4 2146.29   4
  -9  -5  -4 41916.4 2575.57   2
  10  -5   4 1416.73 560.859   4
  10   5   4 1750.42 484.117   4
 -10  -5  -4 854.952 517.260   2
 -11  -5  -4 18475.9 1844.11   2
  11   5   4 18547.5 1570.52   4
  11  -5   4 16353.5 1628.43   4
  12  -5   4 19300.5 1818.36   4
 -12  -5  -4 23063.4 2178.62   2
  12   5   4 21277.9 1754.74   4
 -13  -5  -4 16563.9 1917.78   2
  13  -5   4 17386.3 1792.40   4
  13   5   4 20037.8 1766.25   4
  14   5   4 9433.16 1283.10   4
  14  -5   4 7285.99 1187.06   4
 -14  -5  -4 8554.18 1450.42   2
  15  -5   4 6249.61 1194.05   4
 -16   6   4 2579.05 979.310   1
  16  -6  -4 1622.21 787.466   4
 -15   6   4 15294.8 1975.37   1
  15  -6  -4 14404.8 1962.74   4
  14  -6  -4 29788.0 2670.82   4
 -14   6   4 33098.8 2750.38   1
 -13   6   4 34532.4 2701.41   1
  13  -6  -4 31936.7 2677.55   4
 -12   6   4 48859.7 3095.12   1
  12  -6  -4 43427.7 3021.34   4
 -11   6   4 10328.3 1339.70   1
  11  -6  -4 8029.62 1251.50   4
  10  -6  -4 11423.8 1383.08   4
 -10   6   4 11578.0 1336.77   1
  -9   6   4 52907.5 2767.22   1
   9  -6  -4 49834.8 2820.37   4
   8  -6  -4 109437. 4300.96   4
  -8   6   4 127001. 4312.38   1
   7  -6  -4 165619. 5232.62   4
  -7   6   4 176997. 5196.48   1
  -6   6   4 66460.8 2682.47   1
   6  -6  -4 62641.6 2690.68   4
   6   6  -4 66992.5 2638.69   1
   5   6  -4 953.355 310.767   1
  -5   6   4 712.668 245.613   1
   4  -6  -4 7223.25 681.174   4
   4   6  -4 7451.65 854.391   3
  -4   6   4 8020.09 772.218   1
   4  -6  -4 6084.95 710.427   2
  -4  -6   4 6708.64 444.852   2
  -3  -6   4 70973.5 1629.21   2
   3   6  -4 75293.9 2916.90   3
  -3   6   4 75370.6 2611.47   1
   3  -6  -4 72877.9 2564.95   2
   3  -6  -4 74726.1 2260.00   4
   3   6  -4 72046.3 2210.38   1
  -3   6   4 74932.2 2556.03   2
   2   6  -4 235173. 6264.46   3
   2  -6  -4 233730. 5098.99   4
   2  -6  -4 243026. 5777.17   2
   2   6  -4 233098. 5023.49   1
  -2   6   4 250930. 5817.14   2
  -1   6   4 235335. 5538.91   2
   1   6  -4 213669. 4434.88   1
   1   6  -4 231501. 6001.19   3
   1  -6  -4 231587. 5489.15   2
   0   6   4 92831.3 2838.99   2
   0   6   4 85326.2 1941.08   4
   0   6  -4 92283.1 3224.35   3
   0  -6  -4 87097.8 2775.93   2
  -1  -6  -4 9143.83 834.681   2
   1   6   4 8502.35 795.244   2
   1   6   4 7827.80 348.434   4
  -1   6  -4 10094.6 963.536   3
  -2  -6  -4 11532.7 925.541   2
  -2   6  -4 10568.5 1002.45   3
  -2   6  -4 11942.0 569.066   1
  -3  -6  -4 35686.9 1779.73   2
   3  -6   4 35691.0 1175.72   1
  -3   6  -4 36357.0 1896.11   3
  -3   6  -4 36730.7 1300.43   1
   4  -6   4 128218. 3260.62   1
  -4  -6  -4 128436. 4011.39   2
  -4   6  -4 131461. 4094.76   3
  -4   6  -4 127326. 3359.61   1
   5  -6   4 129268. 3508.74   1
  -5   6  -4 125280. 3983.68   3
  -5   6  -4 123991. 3514.97   1
   6  -6   4 54195.3 2230.58   1
  -6  -6  -4 54459.3 2600.01   2
  -6   6  -4 58821.7 2483.44   3
  -6   6  -4 55071.3 2245.57   1
  -7  -6  -4 692.026 427.512   2
  -7   6  -4 866.603 360.702   3
   7  -6   4 470.468 295.224   1
  -7   6  -4 582.361 306.489   1
  -8   6  -4 7311.39 846.362   3
  -8  -6  -4 8346.99 1052.69   2
  -8   6  -4 6972.96 867.334   1
  -9  -6  -4 34264.2 2348.56   2
  -9   6  -4 40807.6 2254.43   1
  10   6   4 130427. 4427.42   4
 -10  -6  -4 127530. 5103.93   2
 -11  -6  -4 65339.6 3636.03   2
  11   6   4 68592.9 3147.95   4
  12   6   4 5782.32 954.354   4
 -12  -6  -4 5384.32 1089.23   2
  13   6   4 4890.63 877.392   4
 -13  -6  -4 5200.57 1095.62   2
 -14  -6  -4 12445.4 1762.24   2
  16  -7  -4 34418.2 3118.96   4
 -16   7   4 41324.9 3393.47   1
  15  -7  -4 20529.2 2295.19   4
 -15   7   4 22726.1 2413.54   1
  14  -7  -4 3900.27 1115.18   4
 -14   7   4 4474.53 1090.41   1
  13  -7  -4 418.785 469.165   4
 -13   7   4 1642.47 706.262   1
 -12   7   4 27350.8 2302.55   1
  12  -7  -4 24403.1 2249.97   4
  11  -7  -4 100019. 4599.72   4
 -11   7   4 109566. 4621.22   1
 -10   7   4 177200. 5845.16   1
  10  -7  -4 145659. 5621.61   4
  -9   7   4 94871.7 3888.34   1
   9  -7  -4 89228.8 3941.66   4
   8  -7  -4 11681.1 1242.27   4
  -8   7   4 13109.5 1277.43   1
   7  -7  -4 818.394 362.327   4
  -7   7   4 188.382 385.346   1
  -6   7   4 78344.1 3060.42   1
  -6  -7   4 78764.6 2529.08   2
   6  -7  -4 74797.8 2990.83   4
   6   7  -4 79527.4 3000.87   1
  -5  -7   4 224623. 5026.86   2
  -5   7   4 228631. 5951.86   1
   5  -7  -4 224288. 5767.21   4
   5   7  -4 222550. 5740.40   1
  -4  -7   4 130046. 3024.94   2
   4  -7  -4 133144. 3731.96   4
   4  -7  -4 136937. 4044.28   2
   4   7  -4 134316. 3723.12   1
  -4   7   4 138119. 4045.35   1
   3  -7  -4 106173. 2908.81   4
  -3   7   4 108027. 3370.29   1
   3  -7  -4 103999. 3302.77   2
   3   7  -4 105326. 2885.40   1
  -3  -7   4 99312.3 2238.21   2
   2   7  -4 40775.9 1395.90   1
   2  -7  -4 41241.4 1855.26   2
  -1   7   4 42863.5 1448.75   4
   1  -7  -4 46928.3 1967.88   2
   0   7   4 253632. 5172.95   4
   0  -7  -4 252180. 6172.59   2
   0   7  -4 238127. 4891.17   2
  -1  -7  -4 301950. 6938.83   2
   1   7   4 293742. 5704.73   4
  -1   7  -4 291424. 5638.58   1
  -2  -7  -4 185362. 5096.16   2
  -2   7  -4 192863. 4098.38   1
  -3  -7  -4 78161.7 2906.72   2
  -3   7  -4 80201.9 2255.89   1
  -4  -7  -4 12792.2 1094.21   2
   4  -7   4 13219.1 764.110   1
  -4   7  -4 12077.3 823.726   1
  -5  -7  -4 8580.71 945.111   2
  -5   7  -4 10215.3 836.201   1
   5  -7   4 9338.22 740.322   1
  -6  -7  -4 73132.5 3138.85   2
   6  -7   4 76907.3 2671.65   1
  -6   7  -4 74132.0 2725.33   1
   7  -7   4 125316. 4006.55   1
  -7  -7  -4 133160. 4651.27   2
  -7   7  -4 129471. 4101.45   1
  -8  -7  -4 82865.3 3650.96   2
  -8   7  -4 80293.5 3145.91   3
  -8   7  -4 83665.7 3275.27   1
  -9  -7  -4 57444.5 3116.40   2
  -9   7  -4 59403.5 2809.66   1
 -10  -7  -4 17695.9 1765.19   2
 -10   7  -4 17977.0 1563.81   1
 -11  -7  -4 8391.56 1311.39   2
  12   7   4 50140.8 2732.02   4
 -12  -7  -4 43429.0 3077.84   2
 -13  -7  -4 42143.7 3110.39   2
 -14  -7  -4 18624.7 2130.21   2
  16  -8  -4 1281.82 816.860   4
 -16   8   4 725.639 565.460   1
 -15   8   4 9861.53 1604.66   1
  15  -8  -4 10586.4 1721.05   4
 -14   8   4 40437.6 3066.37   1
  14  -8  -4 33584.1 2870.87   4
 -13   8   4 46949.9 3251.20   1
  13  -8  -4 44202.3 3172.93   4
 -12   8   4 32154.6 2521.52   1
  12  -8  -4 27161.8 2375.08   4
  11  -8  -4 6368.24 1103.90   4
 -11   8   4 7205.22 1140.12   1
  10  -8  -4 20298.3 1881.98   4
 -10   8   4 22031.2 1896.24   1
   9  -8  -4 70604.0 3446.25   4
  -9   8   4 79134.9 3531.85   1
  -8  -8   4 135473. 4254.08   2
   8  -8  -4 139769. 4850.57   4
  -8   8   4 139312. 4793.75   1
  -7   8   4 176195. 5303.93   1
  -7  -8   4 174206. 4633.83   2
  -6  -8   4 102791. 3023.18   2
  -6   8   4 105253. 3738.31   1
   6  -8  -4 101979. 3588.84   4
   5  -8  -4 25929.7 1512.46   4
  -5  -8   4 25757.7 1128.43   2
   5   8  -4 29170.2 1582.93   1
  -5   8   4 26116.5 1642.56   1
  -4  -8   4 23709.6 936.046   2
   4  -8  -4 23537.9 1309.60   4
   4  -8  -4 23984.5 1489.72   2
   4   8  -4 24047.4 1313.81   1
  -4   8   4 23629.2 1477.65   1
   3   8  -4 130418. 3390.37   1
   3  -8  -4 123568. 3823.27   2
  -3  -8   4 120413. 2706.10   2
  -2  -8   4 247526. 4978.81   2
  -2   8   4 268432. 5806.79   4
   2  -8  -4 262327. 6390.90   2
  -1   8   4 345700. 7347.19   4
   1   8  -4 357134. 6775.59   2
   1  -8  -4 359855. 8201.76   2
   0   8   4 260043. 5428.92   4
   0  -8  -4 271799. 6460.79   2
   0   8  -4 266009. 5188.57   1
  -1   8  -4 34192.5 1055.76   1
   1   8   4 35271.3 1136.20   4
  -1  -8  -4 34576.0 1755.56   2
  -2  -8  -4 8693.22 889.744   2
  -2   8  -4 10912.8 606.807   1
  -2   8  -4 8961.03 604.065   2
  -3  -8  -4 86576.9 3157.01   2
  -3   8  -4 85557.8 2420.41   1
  -4  -8  -4 79202.6 3097.47   2
  -4   8  -4 80846.9 2528.02   1
   5  -8   4 59757.6 2074.26   1
  -5  -8  -4 58185.0 2667.04   2
  -5   8  -4 57230.4 2209.49   1
  -6  -8  -4 15469.1 1350.89   2
   6  -8   4 15558.3 1054.75   1
  -6   8  -4 15942.3 1164.93   1
  -7   8  -4 39.3911 263.919   1
  -7  -8  -4 136.299 354.842   2
   7  -8   4 69.0109 206.723   1
  -8   8  -4 9007.12 1002.29   1
  -8  -8  -4 7558.15 1036.93   2
  -9  -8  -4 36022.2 2435.04   2
  -9   8  -4 34318.8 2095.16   1
 -10  -8  -4 40381.2 2728.63   2
 -10   8  -4 43562.8 2513.23   1
 -11  -8  -4 49228.8 3149.52   2
 -11   8  -4 51912.9 2905.51   1
 -12  -8  -4 14313.4 1730.76   2
 -13  -8  -4 475.115 734.826   2
 -14  -8  -4 10909.8 1635.88   2
 -17  -9   4 12838.1 1860.07   2
  15  -9  -4 4034.44 1113.57   4
 -15   9   4 5876.72 1273.01   1
  14  -9  -4 1085.74 534.571   4
 -14   9   4 937.137 680.328   1
  13  -9  -4 351.467 381.181   4
 -13   9   4 2775.07 877.932   1
 -12   9   4 31873.7 2523.54   1
  12  -9  -4 23442.4 2221.77   4
 -11  -9   4 16385.8 1548.29   2
  11  -9  -4 18714.8 1869.54   4
 -11   9   4 20915.6 1946.14   1
  10  -9  -4 58628.2 3250.99   4
 -10  -9   4 55607.2 2796.52   2
 -10   9   4 61533.9 3246.21   1
   9  -9  -4 25902.8 2008.57   4
  -9  -9   4 29169.0 1827.22   2
  -9   9   4 29950.8 2114.38   1
  -8  -9   4 6429.65 804.919   2
   8  -9  -4 7264.52 992.043   4
  -8   9   4 5738.87 887.208   1
  -7   9   4 1570.80 514.803   1
   7  -9  -4 922.435 397.472   4
  -7  -9   4 1012.86 320.449   2
  -6   9   4 6743.02 884.705   1
   6  -9  -4 7147.11 843.813   4
  -6  -9   4 7741.53 675.692   2
  -5  -9   4 2403.83 342.657   2
   5  -9  -4 1756.05 393.529   4
  -5   9   4 2044.41 477.311   1
   5   9  -4 2397.34 475.853   1
  -4  -9   4 32565.7 1180.12   2
  -4   9   4 31141.0 1799.00   1
   4  -9  -4 30782.8 1800.49   2
   4   9  -4 33374.6 1607.92   1
  -3   9   4 14440.7 1016.06   4
   3  -9  -4 12399.7 1077.18   2
  -3  -9   4 11811.6 597.205   2
   2  -9  -4 1527.43 475.862   2
  -2   9   4 1138.69 300.156   4
  -2  -9   4 1900.03 236.052   2
  -1   9   4 17334.7 953.071   4
   1   9  -4 18074.1 712.168   2
   1  -9  -4 16507.7 1256.97   2
   0   9  -4 55842.5 1544.51   2
   0   9   4 55294.8 1785.82   4
   0  -9  -4 56372.3 2380.96   2
  -1   9  -4 56757.5 1620.67   1
   1   9   4 57272.8 1725.24   4
  -1   9  -4 52368.4 1605.44   2
  -1  -9  -4 55430.7 2408.06   2
  -2  -9  -4 87953.9 3186.84   2
  -2   9  -4 89988.6 2349.32   1
  -2   9  -4 82263.7 2367.40   2
  -3  -9  -4 16608.5 1293.23   2
  -3   9  -4 15097.1 864.472   1
  -4  -9  -4-162.799 296.702   2
  -4   9  -4 250.636 192.326   1
  -5   9  -4 2296.26 429.498   1
  -5  -9  -4 3403.88 621.878   2
  -6  -9  -4 11246.9 1180.12   2
   6  -9   4 11793.3 922.612   1
  -6   9  -4 10257.2 947.335   1
  -7  -9  -4 24169.2 1875.40   2
  -7   9  -4 30195.5 1776.17   1
  -8  -9  -4 98552.8 4147.99   2
  -8   9  -4 97824.3 3694.21   1
  -9  -9  -4 15409.0 1594.94   2
  -9   9  -4 16114.4 1425.12   1
 -10  -9  -4 734.778 536.339   2
 -10   9  -4 647.871 407.389   1
 -11  -9  -4 2186.83 754.127   2
 -11   9  -4 1607.80 581.039   1
 -12  -9  -4 7893.32 1324.12   2
 -12   9  -4 11054.5 1356.30   1
 -13  -9  -4 8886.09 1397.30   2
 -17 -10   4 480.145 484.851   2
 -16 -10   4-264.722 637.546   2
 -15  10   4 239.591 420.836   1
  15 -10  -4 680.480 506.321   4
 -15 -10   4 880.751 615.488   2
  14 -10  -4 722.538 482.493   4
 -14  10   4 1925.12 888.371   1
 -14 -10   4 141.315 548.042   2
  13 -10  -4 5603.26 1122.57   4
 -13 -10   4 7931.64 1154.46   2
 -13  10   4 7709.80 1314.52   1
  12 -10  -4-72.1421 575.108   4
 -12 -10   4 554.355 312.253   2
 -12  10   4 9.89215 536.534   1
 -11 -10   4 86.0258 393.810   2
  11 -10  -4-211.847 330.082   4
 -11  10   4-195.661 445.100   1
 -10  10   4 802.809 445.863   1
  10 -10  -4 727.801 434.323   4
 -10 -10   4 867.411 382.665   2
  -9 -10   4 12280.2 1184.97   2
   9 -10  -4 15004.7 1506.72   4
  -9  10   4 11575.0 1328.05   1
  -8  10   4 21942.9 1751.82   1
  -8 -10   4 23888.8 1488.48   2
   8 -10  -4 23528.7 1795.18   4
  -7  10   4 7288.87 972.045   1
  -7 -10   4 6895.77 711.880   2
   7 -10  -4 7103.73 920.143   4
   6 -10  -4-191.179 307.100   4
  -6 -10   4 180.286 176.818   2
  -6  10   4-53.9560 255.403   1
  -5 -10   4 5595.83 526.118   2
  -5  10   4 4880.58 771.873   1
   5  10  -4 5144.89 686.579   1
  -4  10   4-210.277 296.893   1
  -4 -10   4 221.871 120.227   2
  -4  10   4 375.302 311.356   4
   4  10  -4 332.524 180.188   1
   4 -10  -4 309.360 295.877   2
  -3  10   4 8947.57 827.335   4
   3 -10  -4 8225.52 919.001   2
  -3 -10   4 9080.34 561.760   2
  -2 -10   4 12350.7 644.044   2
   2 -10  -4 13704.6 1134.28   2
  -2  10   4 11858.6 897.208   4
  -1  10   4 6864.65 626.002   4
   1  10  -4 7662.45 494.353   2
   1 -10  -4 8643.28 911.901   2
   0  10  -4 1093.14 202.266   2
   0  10   4 976.434 250.421   4
   0 -10  -4 464.406 241.970   2
  -1  10  -4 1441.78 238.466   1
  -1  10  -4 1331.43 223.681   2
  -1 -10  -4 1420.37 402.221   2
   1  10   4 1685.23 294.766   4
  -2 -10  -4 3716.20 612.812   2
  -2  10  -4 2552.42 337.011   1
  -2  10  -4 2876.43 374.088   2
  -3 -10  -4 16866.3 1342.12   2
  -3  10  -4 15118.9 912.829   1
  -3  10  -4 14749.5 924.513   2
  -4 -10  -4 6765.40 910.578   2
  -4  10  -4 5765.22 647.303   2
  -4  10  -4 7171.57 693.345   1
  -5 -10  -4 401.702 376.271   2
  -5  10  -4 43.8843 211.459   1
  -6  10  -4 124.469 244.018   1
  -6 -10  -4-388.403 459.990   2
  -7  10  -4 1808.52 495.089   1
  -7 -10  -4 1120.71 398.256   2
  -8  10  -4 5431.86 792.053   1
  -8 -10  -4 6119.54 1026.13   2
  -9 -10  -4 17931.2 1758.39   2
  -9  10  -4 19908.9 1584.74   1
 -10 -10  -4-307.303 418.897   2
 -10  10  -4 409.787 422.183   1
 -11 -10  -4 1512.50 568.589   2
 -11  10  -4 1066.00 451.305   1
 -12 -10  -4 1021.06 513.625   2
 -12  10  -4 999.299 491.892   1
 -13 -10  -4 262.707 547.678   2
 -17 -11   4 715.581 614.980   2
 -16 -11   4 3083.48 915.644   2
  15 -11  -4-134.811 601.661   4
 -15 -11   4 542.391 470.113   2
 -15  11   4 152.748 724.451   1
  14 -11  -4-744.306 697.994   4
 -14  11   4-370.785 686.993   1
 -14 -11   4 520.391 564.237   2
 -13 -11   4 1124.30 450.491   2
 -13  11   4 772.391 523.192   1
  12 -11  -4-1060.40 566.938   4
 -12 -11   4-231.701 424.621   2
 -12  11   4 47.5046 416.941   1
 -11  11   4 7435.44 1208.99   1
  11 -11  -4 6735.81 1164.47   4
 -11 -11   4 5456.32 900.613   2
 -10  11   4 3049.48 794.226   1
  10 -11  -4 3436.89 871.114   4
 -10 -11   4 3666.28 730.304   2
   9 -11  -4 4750.50 843.972   4
  -9  11   4 4071.71 817.817   1
  -9 -11   4 5171.02 741.901   2
   8 -11  -4 3274.92 721.070   4
  -8 -11   4 5188.73 672.636   2
  -8  11   4 4278.64 821.313   1
   7 -11  -4-247.792 394.118   4
  -7  11   4 200.167 345.541   1
  -7 -11   4 109.124 213.246   2
  -6  11   4 5543.11 843.230   1
  -6 -11   4 6459.97 650.154   2
  -5 -11   4 2652.95 391.564   2
  -5  11   4 2061.05 519.010   1
  -4 -11   4 290.174 113.884   2
  -4  11   4 24.7720 229.483   1
   4 -11  -4 107.682 333.913   2
  -3  11   4 8314.06 855.714   4
   3 -11  -4 7934.93 913.193   2
  -3 -11   4 6550.40 519.003   2
  -2  11   4 494.931 244.741   4
   2  11  -4-50.1462 129.635   2
  -2 -11   4 193.567 123.092   2
   2 -11  -4 708.119 348.457   2
  -1  11   4 4439.59 533.238   4
   1  11  -4 4120.44 395.569   2
   1 -11  -4 5093.45 761.010   2
   0  11  -4 13860.3 750.565   2
   0  11   4 12353.0 873.025   4
   0 -11  -4 14213.3 1212.45   2
   1  11   4 23274.5 1154.96   4
  -1  11  -4 22654.0 1069.74   1
  -1 -11  -4 25005.2 1648.82   2
  -1  11  -4 22085.0 1039.94   2
  -2 -11  -4 6393.65 842.272   2
  -2  11  -4 6790.95 577.254   1
  -2  11  -4 6688.82 572.344   2
  -3 -11  -4 4065.71 702.462   2
  -3  11  -4 4291.77 481.079   1
  -3  11  -4 2935.39 432.706   2
  -4 -11  -4 417.223 275.585   2
  -4  11  -4 811.886 230.404   2
  -4  11  -4 706.761 253.944   1
  -5 -11  -4 1110.90 460.251   2
  -5  11  -4 1884.46 420.248   1
  -6  11  -4 7684.51 860.500   1
  -6 -11  -4 8160.18 1063.19   2
  -7  11  -4 1634.70 482.575   1
  -7 -11  -4 1488.84 504.477   2
  -8  11  -4 4915.53 783.887   1
  -8 -11  -4 4708.20 916.313   2
  -9  11  -4 2245.75 599.274   1
  -9 -11  -4 561.546 388.668   2
 -10  11  -4 844.694 445.203   1
 -10 -11  -4 309.106 345.270   2
 -11 -11  -4 761.947 457.939   2
 -11  11  -4 1630.22 590.196   1
 -12 -11  -4 37.9589 452.049   2
 -16 -12   4 1273.07 735.344   2
 -15 -12   4 6723.15 1265.57   2
  14 -12  -4 8394.90 1454.60   4
 -14 -12   4 7216.92 1170.39   2
 -14  12   4 10166.7 1631.65   1
  13 -12  -4 2600.38 773.144   4
 -13 -12   4 2780.48 754.911   2
 -13  12   4 4557.03 1103.47   1
 -12 -12   4 690.970 295.192   2
  12 -12  -4 479.855 419.368   4
 -12  12   4 741.243 523.846   1
 -11 -12   4 59.7679 338.517   2
  11 -12  -4 585.939 392.658   4
 -10  12   4 11178.0 1433.18   1
  10 -12  -4 9496.93 1301.88   4
 -10 -12   4 12339.9 1246.30   2
   9 -12  -4 12757.7 1438.27   4
  -9 -12   4 11636.6 1122.45   2
  -9  12   4 12294.2 1433.21   1
  -8  12   4 39673.3 2498.83   1
  -8 -12   4 37135.6 1929.01   2
  -7 -12   4 57973.3 2328.14   2
  -7  12   4 55625.2 2925.13   1
  -6 -12   4 25638.4 1365.42   2
  -6  12   4 27868.1 1958.21   1
  -5 -12   4 540.015 168.774   2
  -5  12   4 691.778 311.612   1
   4 -12  -4 10995.9 1163.23   2
  -4 -12   4 10443.2 721.203   2
  -4  12   4 12347.8 1213.08   1
   3 -12  -4 47906.2 2421.23   2
  -3 -12   4 40502.8 1509.38   2
  -2  12   4 86585.3 2973.66   4
   2  12  -4 94321.6 2525.09   2
   2 -12  -4 88832.7 3429.49   2
   1  12  -4 49081.7 1673.00   2
   1 -12  -4 47318.6 2400.35   2
  -1  12   4 48281.3 2011.68   4
   0  12  -4 26626.7 1166.54   2
   0  12   4 25190.4 1344.02   4
   0 -12  -4 26256.0 1729.34   2
  -1  12  -4 18565.5 994.543   2
  -1  12  -4 20625.7 1066.54   1
   1  12   4 19752.1 1135.30   4
  -1 -12  -4 21465.3 1558.71   2
  -2  12  -4 13667.7 880.593   1
  -2  12  -4 14199.7 893.844   2
  -2 -12  -4 13045.0 1266.76   2
  -3 -12  -4 1361.63 405.432   2
  -3  12  -4 1844.35 354.671   1
  -3  12  -4 1639.74 342.235   2
  -4 -12  -4 9807.78 1085.71   2
  -4  12  -4 9483.16 827.051   1
  -5 -12  -4 41026.9 2436.87   2
  -5  12  -4 41985.2 1985.42   1
  -6  12  -4 23991.7 1556.74   1
  -6 -12  -4 23417.8 1875.62   2
  -7 -12  -4-63.9094 309.642   2
  -7  12  -4 284.406 305.809   1
  -8 -12  -4-220.174 381.925   2
  -8  12  -4 988.487 452.997   1
  -9 -12  -4 2910.89 833.060   2
  -9  12  -4 2159.32 562.293   1
 -10 -12  -4 23926.8 2155.92   2
 -10  12  -4 21755.8 1828.85   1
 -11 -12  -4 13773.6 1687.33   2
 -12 -12  -4 331.786 534.097   2
  14 -13  -4 4264.54 1097.82   4
 -14 -13   4 5906.92 1105.83   2
 -14  13   4 4975.58 1152.67   1
  13 -13  -4 250.741 578.600   4
 -13 -13   4-68.8553 511.163   2
 -13  13   4 133.919 509.078   1
  12 -13  -4 7373.14 1297.09   4
 -12 -13   4 6384.56 1032.96   2
 -12  13   4 8034.29 1427.21   1
 -11 -13   4 31675.2 2199.94   2
 -11  13   4 36145.6 2699.14   1
 -10 -13   4 74304.8 3285.14   2
 -10  13   4 70640.1 3790.16   1
  -9 -13   4 32797.0 1938.80   2
  -9  13   4 30634.0 2352.18   1
  -8 -13   4 6101.24 778.275   2
  -8  13   4 5155.68 917.267   1
  -7 -13   4 5391.93 681.025   2
  -7  13   4 6801.52 1035.99   1
  -6 -13   4 61639.7 2313.24   2
  -6  13   4 61011.7 3098.27   1
  -5  13   4 93084.7 3805.96   1
  -5 -13   4 86385.2 2759.86   2
   4 -13  -4 94841.7 3767.82   2
  -4 -13   4 88972.6 2714.34   2
  -4  13   4 94868.1 3770.42   1
   3 -13  -4 39810.2 2308.50   2
  -3 -13   4 38554.6 1544.55   2
   2  13  -4 6711.59 593.836   2
  -2 -13   4 6698.85 601.482   2
   2 -13  -4 7457.94 928.644   2
  -1  13   4 7877.09 800.677   4
   1  13  -4 7482.87 618.001   2
   1 -13  -4 6722.41 889.172   2
   0  13  -4 70045.4 2224.68   2
   0  13   4 71210.3 2567.66   4
   0 -13  -4 70413.8 3085.57   2
  -1  13  -4 130260. 3503.18   2
  -1  13  -4 134576. 3631.35   1
   1  13   4 132939. 3781.90   4
  -1 -13  -4 128740. 4483.41   2
  -2  13  -4 93634.7 2884.03   1
  -2 -13  -4 94474.9 3728.54   2
  -2  13  -4 92326.7 2844.38   2
  -3  13  -4 19864.6 1195.37   1
  -3 -13  -4 18102.1 1566.35   2
  -4  13  -4 1282.63 299.873   1
  -4 -13  -4 933.773 375.851   2
  -5 -13  -4 7514.17 1012.73   2
  -5  13  -4 7923.32 851.298   1
  -6 -13  -4 40780.6 2530.16   2
  -6  13  -4 40570.0 2100.20   1
  -7  13  -4 34846.4 2051.88   1
  -7 -13  -4 36657.3 2496.60   2
  -8 -13  -4 31980.8 2400.39   2
  -8  13  -4 40543.9 2320.29   1
  -9 -13  -4 11831.5 1503.84   2
 -10 -13  -4 994.532 465.317   2
 -11 -13  -4 9821.80 1439.91   2
 -13  14   4 48662.4 3543.72   1
 -12 -14   4 25627.9 2065.17   2
 -12  14   4 24818.3 2390.04   1
 -11 -14   4 14702.4 1499.46   2
 -11  14   4 14270.6 1747.11   1
 -10  14   4 291.660 504.642   1
 -10 -14   4 371.704 265.228   2
  -9 -14   4 16089.3 1360.20   2
  -9  14   4 18295.2 1842.12   1
  -8 -14   4 34929.4 1939.46   2
  -8  14   4 40076.3 2636.71   1
  -7 -14   4 60146.7 2476.37   2
  -7  14   4 64667.7 3293.75   1
  -6  14   4 52125.9 2884.60   1
  -6 -14   4 49148.1 2088.24   2
  -5  14   4 12668.2 1348.11   1
  -5 -14   4 13706.2 972.391   2
   4 -14  -4 15562.2 1482.49   2
  -4 -14   4 12633.5 906.372   2
  -4  14   4 13227.5 1374.99   1
   3 -14  -4 62079.1 2979.09   2
  -3 -14   4 54274.2 2007.38   2
  -2 -14   4 96186.0 2877.99   2
   2 -14  -4 96831.6 3847.97   2
   1 -14  -4 95266.9 3823.26   2
   0 -14  -4 26012.5 1864.84   2
  -1  14  -4 272.672 181.320   1
  -1 -14  -4-262.361 462.358   2
  -2  14  -4 20339.1 1221.82   1
  -2 -14  -4 19353.5 1608.85   2
  -3 -14  -4 96499.0 3974.64   2
  -3  14  -4 103512. 3255.60   1
  -4  14  -4 94269.6 3224.67   1
  -4 -14  -4 96814.8 4005.55   2
  -5 -14  -4 75473.1 3570.83   2
  -5  14  -4 73326.5 2887.62   1
  -6 -14  -4 33036.0 2367.29   2
  -6  14  -4 34518.0 1963.56   1
  -7 -14  -4 6914.48 1105.23   2
  -7  14  -4 7328.85 934.685   1
  -8 -14  -4 8611.08 1294.56   2
  -9 -14  -4 44355.8 3017.02   2
 -10 -14  -4 31629.4 2626.87   2
 -11 -14  -4 38132.0 2963.16   2
 -13  15   4 1758.95 793.104   1
 -12  15   4 17507.8 2050.69   1
 -11  15   4 19782.1 2102.55   1
 -10  15   4 40572.0 2916.41   1
  -9  15   4 15345.7 1712.28   1
  -9 -15   4 16069.1 1385.63   2
  -8  15   4 209.341 450.275   1
  -8 -15   4 323.531 310.194   2
  -7  15   4 11885.3 1446.06   1
  -7 -15   4 11488.3 1031.91   2
  -6  15   4 34449.8 2366.70   1
  -6 -15   4 32136.8 1677.36   2
  -5  15   4 73578.9 3504.45   1
  -5 -15   4 69068.5 2527.83   2
   4 -15  -4 101212. 4115.93   2
  -4 -15   4 96876.9 3037.25   2
  -4  15   4 94475.5 4063.01   1
   3 -15  -4 45952.6 2587.65   2
  -3 -15   4 39524.5 1732.91   2
  -2 -15   4 11039.9 845.259   2
   2 -15  -4 11749.4 1274.91   2
   1 -15  -4 8296.47 1012.44   2
   0 -15  -4 53760.7 2834.82   2
  -1  15  -4 60982.8 2340.80   1
  -1 -15  -4 59645.9 2998.80   2
  -2 -15  -4 110097. 4278.01   2
  -2  15  -4 107436. 3414.15   1
  -3  15  -4 57448.8 2359.62   1
  -3 -15  -4 59664.4 3052.47   2
  -4 -15  -4 241.060 351.149   2
  -4  15  -4-176.531 366.539   1
  -5 -15  -4 16769.5 1600.90   2
  -5  15  -4 15522.2 1252.61   1
  -6 -15  -4 23572.3 1989.76   2
  -7 -15  -4 49248.2 3069.63   2
  -8 -15  -4 50916.9 3213.39   2
  -9 -15  -4 1780.18 702.433   2
 -10 -15  -4-90.1627 645.620   2
 -12  16   4 4977.41 1134.64   1
 -11  16   4 2429.18 842.824   1
 -10  16   4-297.229 521.965   1
  -9  16   4 6245.96 1144.64   1
  -8  16   4 16674.8 1802.09   1
  -7  16   4 15502.1 1662.62   1
  -6  16   4 4883.93 928.219   1
  -6 -16   4 2463.84 482.975   2
  -5  16   4 519.391 490.387   1
  -5 -16   4 351.974 255.766   2
  -4  16   4 3302.99 727.023   1
   4 -16  -4 4441.50 898.586   2
  -4 -16   4 3991.45 544.582   2
   3 -16  -4 24674.7 1954.14   2
  -3 -16   4 25966.9 1430.38   2
   2 -16  -4 26417.4 2006.32   2
   1 -16  -4 18649.3 1617.48   2
   0 -16  -4 5127.81 852.624   2
   0  16  -4 5115.91 658.430   1
  -1  16  -4 692.336 259.441   1
  -1 -16  -4-52.2160 382.307   2
  -2  16  -4 3420.04 558.447   1
  -2 -16  -4 3721.51 758.167   2
  -3  16  -4 21814.7 1419.85   1
  -3 -16  -4 21900.9 1828.86   2
  -4 -16  -4 21581.9 1875.28   2
  -5 -16  -4 11226.2 1363.83   2
  -6 -16  -4 7965.40 1190.66   2
  -7 -16  -4 5978.58 1036.18   2
  -8 -16  -4 9948.94 1435.41   2
  -9 -16  -4 41817.9 3040.45   2
 -10 -16  -4 20073.8 2180.81   2
 -11  17   4 1956.82 768.320   1
 -10  17   4 2586.95 817.329   1
  -9  17   4 641.052 440.163   1
  -8  17   4 304.467 365.209   1
  -7  17   4 50.8340 323.771   1
  -6  17   4 154.371 418.509   1
  -5  17   4 335.866 332.712   1
   4 -17  -4 2790.80 752.175   2
  -4  17   4 2530.61 693.511   1
  -3  17   4-405.348 379.905   1
   3 -17  -4 456.899 461.093   2
   2 -17  -4 1381.23 466.370   2
   1 -17  -4 319.401 371.454   2
   0  17  -4 1631.47 388.937   1
   0 -17  -4 1155.56 465.687   2
  -1  17  -4 7843.30 858.117   1
  -1 -17  -4 8454.80 1189.33   2
  -2 -17  -4 8517.85 1186.67   2
  -3 -17  -4 553.798 544.807   2
  -4 -17  -4 278.539 340.632   2
  -5 -17  -4-133.809 349.797   2
  -6 -17  -4-326.413 467.032   2
  -7 -17  -4 2555.20 748.379   2
  -8 -17  -4 3876.38 983.719   2
  -9 -17  -4 146.035 479.727   2
 -10  18   4 417.670 476.799   1
  -9  18   4-1.19829 409.618   1
  -8  18   4 350.888 385.688   1
  -7  18   4 4106.22 982.969   1
  -6  18   4 1542.04 587.723   1
  -5  18   4 116.354 348.033   1
  -4  18   4 161.591 371.351   1
  -3  18   4 34.5521 314.575   1
   3 -18  -4 963.230 575.663   2
   2 -18  -4 391.749 401.113   2
   1 -18  -4 196.538 382.411   2
   0 -18  -4-239.821 372.211   2
  -1 -18  -4-454.483 562.718   2
  -2 -18  -4 307.224 436.435   2
  -3 -18  -4 759.565 466.516   2
  -4 -18  -4 822.087 460.321   2
  -5 -18  -4 3091.96 770.063   2
  -6 -18  -4-373.115 507.417   2
  -7 -18  -4-304.764 628.850   2
  -8 -18  -4 555.087 466.266   2
  -9  19   4 6216.84 1230.28   1
  -8  19   4 2786.17 807.088   1
  -7  19   4 92.1758 375.114   1
  -6  19   4 3735.74 885.245   1
  -5  19   4 11468.9 1531.33   1
  -4  19   4 13306.5 1601.50   1
   3 -19  -4 1433.77 661.845   2
  -3  19   4 1517.06 559.886   1
   2 -19  -4-396.466 559.652   2
   1 -19  -4 3078.64 804.721   2
   0 -19  -4 5153.12 983.633   2
  -1 -19  -4 6417.05 1083.12   2
  -2 -19  -4 6294.39 1113.80   2
  -3 -19  -4 2920.05 775.545   2
  -4 -19  -4-458.211 610.643   2
  -5 -19  -4 2079.74 683.661   2
  -6 -19  -4 10231.9 1507.85   2
  -7 -19  -4 12276.7 1677.75   2
  -7  20   4 23801.0 2323.00   1
  -6  20   4 19574.6 2052.64   1
  -5  20   4 3856.95 926.523   1
  -4  20   4 2853.99 916.356   1
  -3  20   4 21068.2 2093.05   1
   3 -20  -4 24353.2 2177.95   2
   2 -20  -4 36049.3 2677.68   2
   1 -20  -4 26854.9 2282.00   2
   0 -20  -4 3387.81 812.584   2
  -1 -20  -4-488.834 509.579   2
  -2 -20  -4 10380.6 1426.04   2
  -3 -20  -4 44521.9 3054.06   2
  -4 -20  -4 36666.0 2768.48   2
  -5 -20  -4 18159.4 1965.29   2
  -5  21   4 40837.7 3042.99   1
  -4  21   4 45824.5 3189.25   1
   3 -21  -4 23770.0 2249.86   2
  -3  21   4 21317.1 2131.38   1
  -2  21   4 1716.13 520.433   1
   2 -21  -4 2904.64 867.946   2
   1 -21  -4 2301.15 654.396   2
   0 -21  -4 11962.5 1526.68   2
  -1 -21  -4 25625.7 2299.18   2
  -2 -21  -4 46442.7 3134.12   2
  -3 -21  -4 30486.5 2563.37   2
  -4 -21  -4-539.197 632.531   2
   2 -22  -4 37314.5 2870.39   2
   1 -22  -4 28903.2 2523.24   2
   0 -22  -4 12440.0 1622.47   2
 -17   0   5-450.404 843.836   1
 -16   0   5 567.033 633.516   1
 -15   0   5 233.449 560.672   1
 -14   0   5-429.679 507.550   1
 -13   0   5 588.853 613.726   1
 -13   0   5 172.924 321.087   3
 -12   0   5 286.098 407.130   1
 -12   0   5-649.689 473.446   3
 -11   0   5 707.325 587.441   1
 -11   0   5 369.307 436.175   3
 -10   0   5 423.965 429.722   1
  -9   0   5 344.225 423.355   1
  -8   0   5 642.366 515.706   1
  -7   0   5 1273.50 454.766   1
   6   0  -5-86.8234 178.354   1
  -6   0   5 143.705 298.156   1
   5   0  -5 152.060 174.061   1
  -5   0   5-146.026 253.688   1
  -4   0   5 26.3270 189.019   1
   4   0  -5 2.21450 147.172   1
  -4   0   5 37.5191 103.059   2
  -3   0   5 99.8360 155.790   2
  -3   0   5 274.655 149.306   1
  -2   0   5-41.2498 87.1173   2
  -2   0   5-10.6917 112.275   1
   1   0  -5 337.305 141.269   2
  -1   0   5 84.4892 117.916   2
  -1   0   5 156.841 108.625   1
   0   0  -5 211.754 139.186   2
   0   0   5-22.4350 121.277   2
  -1   0  -5 57.7067 198.145   2
  -2   0  -5 69.2983 114.858   4
  -2   0  -5-188.434 187.109   2
  -3   0  -5 24.6947 131.205   4
  -3   0  -5 246.280 199.535   2
   4   0   5 388.105 345.802   3
  -4   0  -5 113.245 214.819   2
   5   0   5 28.1926 247.310   3
   5   0   5 203.195 247.904   1
   6   0   5-113.344 224.170   4
   6   0   5 113.535 200.371   3
   7   0   5-16.0772 247.049   4
   7   0   5 6.07103 180.409   3
   8   0   5-333.744 318.886   4
   9   0   5-252.652 264.561   4
  10   0   5-221.114 288.251   4
  11   0   5-148.992 346.919   4
  12   0   5-132.901 404.981   4
  13   0   5-294.743 408.885   4
  14   0   5-398.992 553.731   4
  15   0   5-579.819 537.936   4
 -17  -1   5 9349.98 1601.45   1
 -17   1   5 11251.4 1864.97   1
 -16  -1   5 9689.47 1631.15   1
 -16   1   5 8255.03 1508.20   1
 -15   1   5 5667.98 1244.91   1
 -15  -1   5 5927.56 1196.68   1
 -14   1   5 657.888 469.706   1
 -14  -1   5-159.316 496.654   1
 -13   1   5 8327.37 1356.85   1
 -13   1   5 7864.05 1014.48   3
 -13  -1   5 7160.69 841.947   3
 -13  -1   5 6565.93 1249.83   1
 -12  -1   5 29299.0 1858.30   3
 -12  -1   5 33762.6 2591.59   1
 -12   1   5 31588.6 2516.44   1
 -11  -1   5 34940.7 2079.71   3
 -11  -1   5 40030.1 2727.98   1
 -11   1   5 36371.4 2590.31   1
 -10  -1   5 1674.39 527.829   1
 -10  -1   5 2072.57 635.355   3
 -10   1   5 542.383 366.281   1
  -9   1   5 28072.0 2002.49   1
  -9  -1   5 30008.2 1950.05   3
  -9  -1   5 27629.2 2044.78   1
  -8  -1   5 7098.78 964.734   1
  -8   1   5 6642.58 923.185   1
  -7  -1   5 97959.4 3643.43   1
  -7   1   5 92765.9 3477.41   1
  -6  -1   5 140598. 4243.64   1
   6   1  -5 133220. 3883.69   1
  -6   1   5 137204. 4131.28   1
  -6   1   5 129023. 3676.31   2
   6  -1  -5 129830. 3907.47   1
   5   1  -5 60813.9 2155.09   1
   5  -1  -5 55888.6 2146.33   1
  -5  -1   5 62073.7 2388.41   1
  -5  -1   5 58711.2 1917.51   2
  -5   1   5 59752.5 2292.28   1
  -5   1   5 59078.6 2045.36   2
  -4  -1   5 98299.1 2917.23   1
   4  -1  -5 91107.6 2751.14   1
  -4  -1   5 89967.0 2419.30   2
  -4   1   5 92229.8 2628.47   2
   4   1  -5 95756.0 2685.66   1
  -4   1   5 92163.6 2837.70   1
   3   1  -5 113287. 2916.09   1
  -3   1   5 115916. 3130.34   1
  -3  -1   5 116510. 3086.18   1
   3  -1  -5 120336. 3057.53   2
  -3  -1   5 118846. 2800.97   2
  -3   1   5 118728. 3034.66   2
  -2   1   5 20564.4 978.828   2
  -2  -1   5 21007.5 843.770   2
  -2  -1   5 22501.2 933.828   1
  -2   1   5 19668.1 971.876   1
   2   1  -5 21242.6 831.026   2
   2  -1  -5 20770.7 987.870   2
  -1  -1   5 7694.41 461.676   1
  -1   1   5 7086.25 552.428   2
  -1  -1   5 7781.15 500.646   2
   1   1  -5 8087.21 483.694   2
   0  -1  -5 11319.4 711.791   2
   0   1  -5 11048.8 617.556   2
   0   1   5 10099.9 713.821   2
   0  -1   5 10115.0 623.286   2
  -1  -1  -5 154805. 3875.52   2
  -1   1  -5 156371. 3695.16   2
  -1  -1  -5 155851. 3328.84   4
   1   1   5 163690. 4028.58   2
  -2  -1  -5 13216.6 888.023   2
  -2   1  -5 14059.2 790.338   4
  -2   1  -5 13639.9 845.212   2
   2  -1   5 15126.1 1210.00   3
  -2  -1  -5 15177.7 688.751   4
  -3   1  -5 1407.36 291.040   4
  -3  -1  -5 813.370 316.849   2
   3  -1   5 1920.76 474.931   3
  -3   1  -5 1286.28 319.339   2
   4  -1   5 425.658 237.990   3
  -4  -1  -5 378.442 201.523   2
  -4   1  -5 500.896 253.751   2
  -4   1  -5 1065.62 291.296   4
   4  -1   5 474.098 201.336   1
  -5  -1  -5 12057.3 1080.02   2
   5  -1   5 12988.6 1006.45   3
   5  -1   5 13729.1 1092.57   1
   6   1   5 22860.8 1353.53   3
   6   1   5 20246.7 1161.36   4
   6  -1   5 20601.2 1220.13   3
   6  -1   5 21298.2 1515.87   1
  -6  -1  -5 19728.5 1466.19   2
   7   1   5 3594.00 509.125   4
   7  -1   5 3345.97 525.856   4
   7   1   5 4687.16 549.101   3
  -7  -1  -5 4458.89 729.356   2
   8   1   5 3936.66 598.284   4
   8  -1   5 3787.11 589.699   4
   8   1   5 3081.85 388.918   3
   9  -1   5 46221.3 2323.05   4
   9   1   5 45047.7 2225.26   4
  10   1   5 650.227 328.300   4
  10  -1   5 676.479 243.156   4
  11   1   5 13739.6 1299.53   4
  11  -1   5 12113.5 1274.21   4
  12   1   5 7147.82 1046.94   4
  12  -1   5 7639.48 1042.80   4
  13   1   5 8764.69 1178.38   4
  13  -1   5 8333.69 1157.24   4
  14   1   5 3873.14 808.828   4
  14  -1   5 3719.04 807.635   4
  15  -1   5 629.134 449.175   4
  17  -2  -5 741.365 837.227   4
 -17   2   5 1030.44 715.338   1
 -16   2   5 7416.44 1395.61   1
  16  -2  -5 6363.26 1420.42   4
 -16  -2   5 7875.78 1507.02   1
 -15  -2   5 23472.4 2412.46   1
 -15   2   5 24080.5 2472.95   1
 -14  -2   5 50904.5 3463.07   1
 -14   2   5 53904.9 3583.35   1
 -13  -2   5 86975.8 3305.53   3
 -13  -2   5 86022.1 4458.53   1
 -13   2   5 82169.6 4338.36   1
 -12  -2   5 71744.8 3884.50   1
 -12  -2   5 77184.2 3137.76   3
 -12   2   5 72018.3 3904.10   1
 -11  -2   5 5293.82 1061.11   1
 -11   2   5 4808.27 935.791   1
 -11  -2   5 5163.50 778.803   3
 -10  -2   5-196.575 359.635   1
 -10   2   5 228.181 373.446   1
 -10  -2   5 63.2692 269.735   3
  -9   2   5 17768.7 1548.13   1
  -9  -2   5 17102.9 1450.60   3
  -9  -2   5 17034.3 1599.70   1
  -8   2   5 91509.7 3587.93   1
  -8  -2   5 88824.9 3555.00   3
  -8  -2   5 85223.0 3617.87   1
  -7   2   5 62485.0 2713.32   1
  -7  -2   5 59216.4 2865.36   3
  -7  -2   5 62922.7 2855.97   1
  -6  -2   5 46609.2 2470.13   3
  -6   2   5 45189.0 2097.10   1
  -6   2   5 44723.0 1882.12   2
   6   2  -5 40746.0 1902.86   1
  -6  -2   5 47158.0 2208.23   1
  -5  -2   5 12138.7 1021.23   1
   5   2  -5 13835.4 934.777   1
  -5  -2   5 12785.5 1297.79   3
  -5   2   5 11793.9 844.203   2
   5  -2  -5 12822.3 944.007   1
  -5   2   5 11655.4 937.661   1
  -4  -2   5 21308.0 1217.75   1
  -4   2   5 20268.2 1167.36   1
   4   2  -5 19553.1 1020.56   1
  -4  -2   5 23398.2 933.215   2
  -4   2   5 23211.2 1170.08   2
  -4  -2   5 18838.1 1543.74   3
   3   2  -5 243017. 5221.35   1
  -3  -2   5 241172. 5510.08   1
   3  -2  -5 246937. 5551.17   2
  -3   2   5 241169. 5624.51   1
  -3  -2   5 262738. 5029.95   2
  -3   2   5 242219. 5532.53   2
  -2   2   5 244551. 5572.41   2
  -2   2   5 243486. 5569.19   1
  -2  -2   5 259218. 5009.31   2
  -2  -2   5 257635. 5311.59   1
   2  -2  -5 247070. 5547.67   2
  -1  -2   5 98269.5 2251.34   1
  -1   2   5 97960.0 2742.49   2
  -1  -2   5 94553.9 2282.43   2
  -1  -2   5 95878.5 3631.75   3
   1   2  -5 100336. 2244.32   2
   1  -2  -5 97632.7 2718.96   2
   0  -2  -5 50366.5 1799.70   2
   0   2  -5 52929.2 1467.15   2
   0  -2   5 50069.5 1274.21   1
   0   2   5 52193.1 1855.91   2
   0  -2   5 47480.1 2365.46   3
  -1  -2  -5 7676.78 651.877   2
  -1  -2  -5 7475.11 344.014   4
  -1   2  -5 7950.34 534.196   2
   1   2   5 7384.96 660.404   2
   1  -2   5 9228.34 966.084   3
  -2  -2  -5 55433.3 2056.70   2
  -2   2  -5 57361.3 1909.00   4
  -2   2  -5 53957.9 1842.34   2
   2  -2   5 59009.2 2518.45   3
   2  -2   5 59769.0 1780.90   1
  -3  -2  -5 25749.8 1403.29   2
   3  -2   5 25588.7 1559.33   3
  -3   2  -5 27164.0 1306.34   2
  -3   2  -5 27892.7 1292.01   4
   3  -2   5 28033.5 1279.52   1
  -4   2  -5 112071. 3307.81   4
  -4  -2  -5 110909. 3557.95   2
   4  -2   5 117604. 3462.48   1
   4  -2   5 117764. 3672.69   3
  -5   2  -5 152564. 4290.67   4
   5   2   5 152105. 3750.25   4
  -5  -2  -5 153672. 4550.50   2
   5  -2   5 155651. 4344.98   3
   5  -2   5 155377. 4494.33   1
   6   2   5 28007.8 1356.58   4
  -6  -2  -5 32284.0 1882.00   2
   6  -2   5 29115.1 1776.92   1
   7   2   5 6823.40 703.303   4
   7   2   5 9109.97 815.741   3
  -7  -2  -5 6952.55 911.604   2
   8   2   5 10233.0 926.622   4
   8  -2   5 8309.12 912.691   4
   8   2   5 9830.33 772.891   3
  -8  -2  -5 7915.25 1059.70   2
   9   2   5 37911.5 2002.23   4
   9   2   5 41805.6 1505.93   3
  -9  -2  -5 41745.5 2633.65   2
   9  -2   5 40311.0 2198.48   4
 -10  -2  -5 45495.1 2775.79   2
  10   2   5 40797.1 2219.76   4
  10  -2   5 44299.5 2419.54   4
  11   2   5 11540.9 1185.02   4
  11  -2   5 10613.9 1206.85   4
 -11  -2  -5 9802.63 1446.50   2
  12  -2   5-131.211 442.992   4
  12   2   5 467.503 296.744   4
 -12  -2  -5 150.258 387.955   2
  13   2   5 3782.61 780.938   4
  13  -2   5 2557.59 689.267   4
 -13  -2  -5 1816.52 757.973   2
  14  -2   5 13619.5 1601.71   4
 -14  -2  -5 14047.5 1808.84   2
  14   2   5 15257.7 1596.66   4
  15  -2   5 37765.6 2767.33   4
  16  -2   5 14683.5 1783.31   4
  17  -3  -5 42761.7 3572.62   4
 -17   3   5 49376.4 3752.59   1
 -16   3   5 34811.4 3089.40   1
  16  -3  -5 32309.8 3019.93   4
  15  -3  -5 24425.4 2511.09   4
 -15   3   5 18606.6 2162.88   1
 -14   3   5 3400.29 944.258   1
 -14  -3   5 2850.85 827.188   1
 -13  -3   5 22640.7 2163.91   1
 -13   3   5 18648.0 2022.04   1
 -12   3   5 90316.7 4355.67   1
 -12  -3   5 88575.1 3408.29   3
 -12  -3   5 86294.3 4270.46   1
 -11   3   5 126704. 5038.26   1
 -11  -3   5 122730. 4223.76   3
 -11  -3   5 119677. 5062.84   1
 -10  -3   5 40520.2 2225.52   3
 -10   3   5 38814.7 2499.61   1
 -10  -3   5 40953.8 2594.14   1
  -9  -3   5 89095.1 3535.25   3
  -9  -3   5 91422.8 3896.67   1
  -9   3   5 89367.6 3808.91   1
  -8   3   5 19728.5 1530.65   1
  -8  -3   5 16371.2 1416.53   3
  -8  -3   5 17041.0 1503.72   1
  -7  -3   5 14724.7 1319.25   3
  -7   3   5 14946.4 1241.40   1
  -7  -3   5 16333.0 1363.37   1
  -6  -3   5 48838.4 2517.64   3
   6   3  -5 49580.5 2097.35   1
  -6   3   5 52570.6 2298.98   1
  -6  -3   5 51190.7 2377.76   1
  -5   3   5 138634. 3969.16   1
  -5   3   5 132894. 3735.51   2
   5  -3  -5 134804. 3901.16   1
   5   3  -5 138064. 3720.60   1
  -5  -3   5 132871. 4019.34   1
  -5  -3   5 127582. 4476.65   3
   4   3  -5 248870. 5588.42   1
  -4   3   5 252347. 6002.94   1
  -4  -3   5 256793. 5195.51   2
  -4   3   5 260464. 5922.20   2
  -4  -3   5 246485. 5977.92   1
  -3  -3   5 120733. 4317.86   3
   3   3  -5 130125. 3079.12   1
  -3   3   5 129172. 3566.60   1
   3  -3  -5 134112. 3534.45   2
  -3  -3   5 133950. 2774.16   2
  -3   3   5 129650. 3501.51   2
  -3  -3   5 123427. 3357.98   1
  -2   3   5 8327.93 677.650   2
  -2  -3   5 7945.15 354.693   2
  -2  -3   5 8600.19 1036.06   3
   2  -3  -5 7883.46 665.737   2
  -2  -3   5 7800.87 518.479   1
  -1  -3   5 105415. 2509.43   1
  -1   3   5 121554. 3277.17   2
  -1  -3   5 113913. 4009.53   3
   1   3  -5 128598. 2462.98   2
   1  -3  -5 116736. 3213.58   2
   0  -3  -5 204242. 4870.67   2
   0   3  -5 201132. 4112.93   2
   0   3   5 207454. 4954.36   2
   0  -3   5 192227. 5629.38   3
  -1  -3  -5 288655. 6329.51   2
   1   3   5 298111. 6478.18   2
  -1   3  -5 298506. 5687.71   2
   1  -3   5 279282. 7079.50   3
  -2  -3  -5 31469.3 1519.93   2
   2  -3   5 34531.5 1846.28   3
  -2   3  -5 32178.9 1307.82   2
   2   3   5 33889.3 1647.88   2
   2  -3   5 32210.6 1175.20   1
   3  -3   5 11025.1 752.903   1
  -3   3  -5 12111.2 874.126   4
  -3  -3  -5 11184.5 932.000   2
   3  -3   5 11626.9 1014.06   3
  -4   3  -5 379.262 232.692   4
   4  -3   5 58.1837 156.890   1
  -4  -3  -5-103.236 272.213   2
   4  -3   5-163.786 306.287   3
   5  -3   5 15169.1 1121.65   1
   5   3   5 13246.2 780.587   4
  -5  -3  -5 13648.2 1165.65   2
   6  -3   5 55540.9 2496.93   1
  -6  -3  -5 53851.1 2573.77   2
   6   3   5 56561.7 1991.22   4
   7   3   5 73910.1 2542.10   4
  -7  -3  -5 76090.1 3286.37   2
   8   3   5 10591.1 932.190   4
   8   3   5 14337.8 986.937   3
  -8  -3  -5 12425.8 1297.65   2
   9   3   5 34914.0 1881.74   4
   9   3   5 38721.8 1500.62   3
  -9  -3  -5 34244.3 2342.97   2
  10   3   5 3336.13 619.466   4
  10  -3   5 1650.16 431.508   4
 -10  -3  -5 2210.39 665.296   2
 -11  -3  -5 17199.3 1763.59   2
  11  -3   5 14660.1 1458.45   4
  11   3   5 16738.1 1413.78   4
  12   3   5 42454.8 2450.92   4
  12  -3   5 42436.9 2672.71   4
 -12  -3  -5 42167.3 2965.07   2
 -13  -3  -5 45510.4 3234.61   2
  13   3   5 48280.8 2754.84   4
  13  -3   5 44404.9 2868.81   4
  14  -3   5 11571.5 1481.46   4
 -14  -3  -5 14192.5 1821.55   2
  15  -3   5-47.3233 464.013   4
  16  -3   5 5676.22 1094.44   4
 -17   4   5 1873.50 944.185   1
  17  -4  -5 3824.06 1239.23   4
 -16   4   5 5243.35 1292.45   1
  16  -4  -5 5171.70 1236.71   4
  15  -4  -5 25695.9 2578.54   4
 -15   4   5 20898.9 2301.04   1
  14  -4  -5 56135.6 3718.47   4
 -14   4   5 53248.7 3569.49   1
 -13   4   5 42494.8 3017.10   1
  13  -4  -5 40019.4 3018.91   4
 -12   4   5 13112.5 1631.74   1
 -12  -4   5 15151.6 1709.31   1
  12  -4  -5 16446.1 1867.16   4
 -11   4   5 4452.09 919.327   1
 -11  -4   5 2969.03 678.712   1
 -10  -4   5 3560.60 628.433   3
 -10   4   5 4388.19 860.081   1
 -10  -4   5 3213.70 747.582   1
  -9   4   5 25868.6 1883.82   1
  -9  -4   5 21754.5 1619.22   3
  -9  -4   5 24907.2 1933.00   1
  -8  -4   5 136269. 4549.62   3
  -8   4   5 130940. 4505.44   1
  -8  -4   5 127433. 4587.87   1
  -7  -4   5 139365. 4646.19   3
  -7  -4   5 135402. 4518.63   1
  -7   4   5 138023. 4440.17   1
  -6  -4   5 22222.0 1626.19   3
   6   4  -5 22143.4 1342.54   1
  -6  -4   5 20079.3 1422.14   1
  -6   4   5 23657.7 1490.16   1
  -5   4   5 11704.6 971.651   1
  -5  -4   5 10639.9 1097.80   3
   5   4  -5 10706.3 831.111   1
  -5  -4   5 11433.5 949.923   1
  -4  -4   5 33387.0 2033.58   3
   4  -4  -5 37481.6 1675.11   2
   4   4  -5 35706.3 1435.61   1
  -4  -4   5 35561.4 1582.05   1
  -4   4   5 38098.1 1743.44   1
  -4   4   5 37726.9 1673.20   2
   3   4  -5 210605. 4631.72   1
  -3   4   5 217970. 5295.46   1
  -3  -4   5 203457. 6042.01   3
   3  -4  -5 218059. 5271.84   2
  -3  -4   5 209485. 4837.36   1
  -3  -4   5 217931. 4144.73   2
  -3   4   5 221532. 5264.70   2
  -2   4   5 260728. 5842.99   2
   2  -4  -5 254182. 5258.42   4
  -2  -4   5 249685. 6719.54   3
   2  -4  -5 256678. 5839.57   2
  -1   4   5 194346. 4744.74   2
   1  -4  -5 185564. 3765.58   4
  -1  -4   5 184301. 5467.02   3
   1  -4  -5 190288. 4680.46   2
   0   4  -5 117839. 2499.93   2
   0   4   5 123632. 3477.08   2
   0  -4   5 115465. 3988.96   3
   0  -4  -5 122157. 3420.04   2
  -1  -4  -5-120.204 222.631   2
   1   4   5-17.6215 228.726   2
  -1   4  -5 315.901 132.406   2
   1  -4   5 69.3126 285.588   3
  -2  -4  -5 65966.7 2430.12   2
   2  -4   5 71884.6 2799.22   3
   2  -4   5 65426.3 1635.28   1
  -3  -4  -5 88400.4 3045.79   2
  -3   4  -5 94008.0 2971.34   4
   3  -4   5 88856.7 2429.04   1
  -4  -4  -5 146196. 4287.51   2
   4   4   5 140985. 3100.53   4
  -5  -4  -5 112081. 3721.58   2
   5   4   5 107221. 2703.26   4
  -6  -4  -5 12588.4 1183.03   2
   6  -4   5 12222.0 1064.85   1
   6   4   5 13171.8 852.330   4
   7   4   5 1009.53 251.202   4
  -7  -4  -5 1344.81 494.831   2
   7  -4   5 867.102 285.671   1
  -8  -4  -5 15384.7 1468.52   2
   8   4   5 14360.8 1077.20   4
  -9  -4  -5 81258.7 3794.66   2
   9   4   5 80005.1 3066.92   4
  10   4   5 93569.7 3474.58   4
 -10  -4  -5 90432.6 4154.52   2
  11   4   5 28924.3 1904.08   4
 -11  -4  -5 30939.6 2453.53   2
 -12  -4  -5 2627.77 798.174   2
  12   4   5 2864.17 669.781   4
 -13  -4  -5 2929.21 830.359   2
 -14  -4  -5 13072.8 1829.64   2
  16  -5  -5 35139.0 3123.18   4
 -16   5   5 31272.3 2946.84   1
  15  -5  -5 20656.8 2335.12   4
 -15   5   5 20291.4 2291.34   1
  14  -5  -5 4466.31 1094.17   4
 -14   5   5 3895.34 1048.80   1
  13  -5  -5 4800.92 1095.15   4
 -13   5   5 4551.10 1048.69   1
 -12   5   5 59252.2 3435.82   1
  12  -5  -5 58703.6 3565.10   4
  11  -5  -5 53303.7 3243.00   4
 -11   5   5 52183.2 3086.96   1
  10  -5  -5 23540.6 2031.26   4
 -10   5   5 26202.6 2051.64   1
   9  -5  -5 14217.9 1495.90   4
  -9   5   5 19120.3 1619.31   1
   8  -5  -5 654.690 466.426   4
  -8   5   5 968.373 349.106   1
   7  -5  -5 10666.4 1162.77   4
  -7  -5   5 9063.30 992.877   3
  -7   5   5 9159.46 1019.75   1
  -6   5   5 44217.3 2135.95   1
   6  -5  -5 42236.1 2182.66   4
   6   5  -5 43030.1 1983.94   1
  -6  -5   5 44320.7 2350.23   3
   5  -5  -5 50698.7 2206.96   4
  -5  -5   5 47874.3 2463.09   3
   5   5  -5 51903.4 2017.91   1
  -5   5   5 51559.8 2238.14   1
  -4   5   5 50865.0 2135.29   1
   4  -5  -5 52140.1 2038.53   4
   4   5  -5 47557.0 1763.26   1
  -4  -5   5 47517.8 2464.53   3
   4  -5  -5 52485.4 2104.98   2
  -3   5   5 29325.6 1493.55   1
   3  -5  -5 28972.4 1270.87   4
  -3  -5   5 27005.1 1779.47   3
   3   5  -5 27708.3 1077.47   1
   3  -5  -5 25175.6 1390.04   2
  -3   5   5 28357.6 1444.80   2
  -2   5   5 12384.1 926.237   2
   2   5  -5 13347.4 531.284   1
   2  -5  -5 13563.5 688.190   4
  -2  -5   5 13239.5 1203.74   3
   2  -5  -5 12155.5 936.147   2
  -1   5   5 142687. 3952.22   2
  -1  -5   5 134811. 4503.51   3
   1  -5  -5 143053. 3913.68   2
   0   5   5 251609. 5758.32   2
   0  -5  -5 243187. 5696.20   2
  -1  -5  -5 157235. 4239.08   2
  -1   5  -5 142065. 4646.59   3
  -2  -5  -5 71020.2 2610.95   2
  -2   5  -5 74337.8 3041.64   3
  -3  -5  -5 18205.3 1259.92   2
   3  -5   5 17653.9 766.710   1
  -3   5  -5 17922.7 1391.97   3
   4   5   5 339.462 115.723   4
   4  -5   5 408.195 149.443   1
  -5  -5  -5 43612.7 2257.53   2
   5   5   5 49361.3 1580.95   4
   5  -5   5 48339.5 1941.33   1
  -6  -5  -5 107717. 3872.57   2
   6   5   5 101490. 2860.73   4
   6  -5   5 97114.8 3329.23   1
   7   5   5 65476.2 2301.66   4
  -7  -5  -5 69989.8 3127.26   2
   8   5   5 49604.6 2124.37   4
  -8  -5  -5 52978.2 2818.87   2
  -9  -5  -5 15184.3 1568.70   2
   9   5   5 15116.2 1179.20   4
 -10  -5  -5 399.081 484.920   2
  10   5   5 337.446 295.588   4
 -11  -5  -5 18639.3 1897.27   2
  11   5   5 16916.6 1422.73   4
  12   5   5 29312.8 1986.69   4
 -12  -5  -5 33758.4 2632.59   2
 -13  -5  -5 26078.2 2428.77   2
 -14  -5  -5 23969.3 2424.44   2
 -16   6   5 822.279 668.251   1
  16  -6  -5 1607.55 839.792   4
 -15   6   5 7297.54 1393.44   1
  15  -6  -5 8242.29 1478.49   4
  14  -6  -5 9656.27 1516.48   4
 -14   6   5 3713.11 940.106   1
  13  -6  -5 11047.4 1557.51   4
 -13   6   5 11770.8 1573.36   1
  12  -6  -5 1868.90 655.702   4
 -12   6   5 1492.11 589.054   1
  11  -6  -5 9517.89 1354.30   4
 -11   6   5 8048.92 1199.14   1
  10  -6  -5 5716.16 957.993   4
 -10   6   5 4996.86 895.704   1
   9  -6  -5 8948.49 1190.50   4
  -9   6   5 12124.4 1306.21   1
   8  -6  -5 16040.4 1477.99   4
  -8   6   5 16375.4 1429.85   1
   7  -6  -5 19631.8 1549.87   4
  -7   6   5 23246.7 1618.88   1
  -6   6   5 4057.98 658.329   1
   6  -6  -5 4389.56 658.213   4
   6   6  -5 3581.51 524.892   1
  -5   6   5 2701.17 490.969   1
   5  -6  -5 2818.44 536.120   4
   5   6  -5 2277.21 396.362   1
   4   6  -5 78830.5 2467.17   1
   4  -6  -5 80505.4 2636.31   4
  -4   6   5 83918.0 2937.71   1
   4  -6  -5 81632.6 2894.27   2
  -4  -6   5 80034.2 1856.17   2
  -3   6   5 78401.1 2796.10   1
   3   6  -5 77229.9 2193.70   1
   3  -6  -5 76759.0 2330.16   4
   3  -6  -5 82248.0 2814.76   2
   2  -6  -5 45127.2 1424.96   4
   2   6  -5 45125.3 1249.47   1
   2  -6  -5 45843.5 1988.04   2
   1  -6  -5 17359.7 1157.21   2
   0  -6  -5 1457.54 386.647   2
  -1  -6  -5 3.35292 194.638   2
  -2  -6  -5 2396.79 455.448   2
  -3  -6  -5 48053.9 2215.36   2
   3  -6   5 50440.4 1381.58   1
  -4  -6  -5 82721.5 3101.06   2
   4   6   5 78576.3 1938.33   4
   4  -6   5 77094.5 2213.40   1
   5  -6   5 56854.0 2035.67   1
   5   6   5 56128.5 1745.07   4
  -5  -6  -5 57524.2 2636.71   2
   6  -6   5 15488.8 1112.72   1
  -6  -6  -5 16924.6 1429.71   2
   6   6   5 16029.5 945.730   4
  -7  -6  -5 2849.88 640.296   2
   7  -6   5 2726.18 501.002   1
   7   6   5 3377.12 490.763   4
   8   6   5 27591.8 1526.45   4
  -8  -6  -5 30325.0 2120.19   2
   9   6   5 13672.4 1136.03   4
  -9  -6  -5 17301.5 1685.33   2
 -10  -6  -5 10046.5 1312.53   2
  10   6   5 11718.1 1103.55   4
 -11  -6  -5 6903.38 1180.05   2
  11   6   5 9183.69 1052.81   4
 -12  -6  -5 2181.51 685.665   2
 -13  -6  -5 39.2684 446.999   2
 -16   7   5 1771.35 839.381   1
  16  -7  -5 758.454 500.706   4
 -15   7   5-877.580 629.753   1
  15  -7  -5 832.081 686.518   4
  14  -7  -5 1275.04 751.098   4
 -14   7   5 1706.75 790.966   1
  13  -7  -5-130.853 410.987   4
 -13   7   5-233.056 409.319   1
  12  -7  -5 4715.05 1005.56   4
 -12   7   5 5007.14 989.175   1
  11  -7  -5 5561.88 1026.57   4
 -11   7   5 6444.04 1122.37   1
 -10   7   5 2955.87 693.036   1
  10  -7  -5 2061.02 625.098   4
  -9   7   5 4538.21 809.530   1
   9  -7  -5 4572.15 847.853   4
   8  -7  -5 335.875 472.246   4
  -8   7   5-539.396 399.714   1
  -7   7   5 9723.26 1046.66   1
   7  -7  -5 9091.10 1057.01   4
   6  -7  -5 1836.99 453.580   4
  -6   7   5 2241.36 497.888   1
   6   7  -5 1555.12 385.093   1
  -6  -7   5 2007.29 352.645   2
   5   7  -5 4954.72 608.764   1
  -5   7   5 4349.94 651.562   1
   5  -7  -5 4585.83 622.880   4
  -5  -7   5 4256.56 382.317   2
  -4  -7   5 610.368 100.680   2
   4   7  -5 949.681 272.496   1
   4  -7  -5 1042.60 291.927   4
  -4   7   5 308.544 260.024   1
   4  -7  -5 436.438 304.951   2
   3   7  -5 19788.3 975.696   1
   3  -7  -5 20532.2 1031.56   4
  -3   7   5 19302.4 1313.64   1
   3  -7  -5 19258.0 1304.10   2
   2   7  -5 8404.45 506.702   1
   2  -7  -5 10349.4 927.023   2
   1  -7  -5 10009.5 912.203   2
   0  -7  -5 7744.63 803.441   2
  -1  -7  -5 1348.42 378.568   2
  -1   7  -5 1788.81 212.976   2
  -2  -7  -5 28455.0 1625.21   2
  -3  -7  -5 469.880 309.886   2
  -4  -7  -5 311.912 284.570   2
   4  -7   5 951.381 202.486   1
  -5  -7  -5-154.339 320.382   2
   5  -7   5 16.4278 126.567   1
  -6  -7  -5 784.505 377.136   2
   6  -7   5 671.656 238.640   1
   7  -7   5 3000.86 497.106   1
  -7  -7  -5 2390.29 624.061   2
   7   7   5 3812.45 522.912   4
   8   7   5 16344.7 1162.42   4
  -8  -7  -5 17881.2 1637.93   2
   9   7   5 5658.24 753.236   4
  -9  -7  -5 5048.38 927.380   2
  10   7   5 1596.03 433.934   4
 -10  -7  -5 676.069 390.577   2
 -11  -7  -5-73.7604 458.126   2
 -12  -7  -5-389.093 443.584   2
 -13  -7  -5-161.043 392.292   2
 -16   8   5 1087.23 693.194   1
  16  -8  -5 358.643 428.301   4
  15  -8  -5 597.864 556.694   4
 -15   8   5 609.052 597.781   1
  14  -8  -5 8682.95 1520.53   4
 -14   8   5 7341.79 1296.65   1
 -13   8   5 22896.9 2244.74   1
  13  -8  -5 18892.1 2067.59   4
  12  -8  -5 9970.69 1497.63   4
 -12   8   5 11429.4 1511.07   1
  11  -8  -5 14806.3 1674.07   4
 -11   8   5 15568.6 1681.86   1
 -10   8   5 4578.55 915.482   1
  10  -8  -5 3773.20 852.992   4
   9  -8  -5 3941.02 749.873   4
  -9   8   5 4055.88 817.959   1
   8  -8  -5 35803.3 2226.85   4
  -8   8   5 35376.4 2214.86   1
  -7   8   5 12942.9 1247.87   1
   7  -8  -5 11535.2 1149.20   4
  -7  -8   5 12069.9 895.587   2
   6   8  -5 3681.46 616.118   1
   6  -8  -5 4033.68 676.009   4
  -6  -8   5 3672.81 428.612   2
  -6   8   5 3405.76 645.760   1
  -5  -8   5 25618.1 991.513   2
   5  -8  -5 26195.9 1496.40   4
   5   8  -5 26392.5 1471.49   1
  -5   8   5 24902.0 1636.21   1
   4  -8  -5 31446.8 1500.02   4
   4  -8  -5 32729.8 1809.80   2
  -4   8   5 32722.4 1803.83   1
   4   8  -5 31709.0 1494.42   1
  -4  -8   5 28328.0 874.960   2
   3  -8  -5 40210.5 1997.73   2
   3   8  -5 39327.3 1527.56   1
   2  -8  -5 79555.8 2897.45   2
   2   8  -5 72222.4 2041.53   1
   1  -8  -5 36352.8 1848.34   2
   1   8  -5 31689.5 992.070   1
   0   8  -5 27692.6 751.722   2
   0  -8  -5 31523.3 1706.11   2
   1   8   5 8704.61 419.310   4
  -1   8  -5 7700.72 442.063   2
  -1  -8  -5 7944.34 867.396   2
  -2  -8  -5 66380.3 2689.98   2
   2   8   5 57192.8 1401.89   4
  -2   8  -5 64977.7 1868.61   2
  -2   8  -5 59299.2 1472.60   1
  -3  -8  -5 11055.8 1059.49   2
  -3   8  -5 11103.4 617.087   1
  -4  -8  -5 10225.8 1062.57   2
  -4   8  -5 13992.6 810.864   1
   5  -8   5 19020.8 1008.32   1
  -5  -8  -5 16966.8 1437.52   2
  -5   8  -5 19685.7 1112.63   1
   6  -8   5 1431.03 313.902   1
  -6  -8  -5 1086.77 466.285   2
  -6   8  -5 847.998 310.751   1
  -7  -8  -5 6648.37 985.562   2
  -7   8  -5 7797.31 836.485   1
  -8  -8  -5 2.50130 389.051   2
  -9  -8  -5 13415.2 1515.10   2
   9   8   5 15115.4 1207.45   4
 -10  -8  -5 35112.7 2566.04   2
 -11  -8  -5 11647.1 1537.55   2
 -12  -8  -5 1519.16 665.822   2
 -13  -8  -5 747.945 637.392   2
  15  -9  -5 8570.86 1523.64   4
 -15   9   5 11273.0 1745.99   1
  14  -9  -5 4257.15 1063.86   4
 -14   9   5 3561.08 1009.06   1
  13  -9  -5-57.9448 406.534   4
 -13   9   5 1344.25 701.910   1
  12  -9  -5 18962.1 2000.05   4
 -12   9   5 23650.8 2171.07   1
  11  -9  -5 25373.6 2196.41   4
 -11   9   5 28682.0 2325.42   1
 -10   9   5 10352.2 1317.80   1
  10  -9  -5 7442.22 1152.97   4
 -10  -9   5 8860.35 1042.97   2
   9  -9  -5 31456.2 2224.45   4
  -9  -9   5 32247.5 1828.49   2
  -9   9   5 29891.4 2152.66   1
   8  -9  -5 2603.45 623.089   4
  -8  -9   5 2596.19 464.117   2
  -8   9   5 3258.29 704.876   1
  -7   9   5 32902.8 2091.24   1
   7  -9  -5 34564.9 2059.34   4
  -7  -9   5 33650.1 1541.16   2
  -6  -9   5 73567.2 2253.44   2
   6  -9  -5 77304.2 3017.13   4
  -6   9   5 77900.2 3255.93   1
  -5  -9   5 61657.4 1789.79   2
  -5   9   5 65900.0 2864.17   1
   5  -9  -5 64627.7 2517.84   4
   5   9  -5 63873.7 2523.91   1
   4  -9  -5 86587.2 3217.71   2
  -4   9   5 81659.1 3140.85   1
   4   9  -5 82920.2 2707.20   1
   3  -9  -5 51743.8 2360.00   2
   3   9  -5 48851.9 1824.02   1
   2   9  -5 6526.41 514.113   1
   2  -9  -5 7029.24 800.287   2
   1   9  -5 29335.4 1033.52   1
   1  -9  -5 27433.2 1677.66   2
   0   9  -5 93880.9 2065.76   2
   0   9  -5 90737.4 2066.16   1
   0   9   5 93650.5 2406.24   4
   0  -9  -5 97457.0 3411.66   2
  -1   9  -5 188064. 3884.04   1
   1   9   5 194391. 4068.32   4
  -1   9  -5 187053. 4038.56   2
  -2  -9  -5 40919.5 2133.57   2
   2   9   5 38582.8 1151.67   4
  -2   9  -5 35206.8 1309.71   2
  -2   9  -5 38149.7 1185.63   1
  -3   9  -5 425.571 183.416   1
  -3  -9  -5 468.901 356.941   2
  -3   9  -5 715.186 212.096   2
  -4   9  -5 306.906 150.251   1
  -4  -9  -5-65.4796 349.817   2
  -5  -9  -5 19348.2 1577.17   2
  -5   9  -5 19245.2 1125.17   1
  -6  -9  -5 69679.9 3224.29   2
  -6   9  -5 67293.8 2511.46   1
  -7  -9  -5 44034.5 2610.76   2
  -7   9  -5 49811.0 2228.12   1
  -8  -9  -5 35918.0 2426.62   2
  -8   9  -5 37905.3 2043.63   1
  -9  -9  -5 24457.4 2070.41   2
  -9   9  -5 24772.2 1726.69   1
 -10  -9  -5 1762.51 679.477   2
 -11  -9  -5 25705.6 2341.80   2
 -12  -9  -5 28523.8 2562.06   2
 -16 -10   5 1804.03 678.314   2
 -15  10   5 15637.5 2047.05   1
  15 -10  -5 10732.8 1719.34   4
 -15 -10   5 13659.5 1695.24   2
 -14  10   5 35985.4 2931.87   1
  14 -10  -5 28130.6 2697.90   4
 -14 -10   5 30532.2 2452.53   2
  13 -10  -5 28159.3 2594.08   4
 -13  10   5 34442.2 2824.98   1
 -13 -10   5 31335.2 2363.42   2
  12 -10  -5 4026.85 964.340   4
 -12 -10   5 4186.56 870.792   2
 -12  10   5 5948.89 1164.31   1
 -11  10   5 1495.22 430.908   1
  11 -10  -5 865.931 555.395   4
 -11 -10   5 1573.45 458.672   2
  10 -10  -5 23092.2 2019.64   4
 -10 -10   5 21923.5 1639.05   2
 -10  10   5 25474.7 2103.04   1
   9 -10  -5 36755.5 2447.86   4
  -9 -10   5 41363.2 2082.72   2
  -9  10   5 41728.0 2591.94   1
  -8  10   5 87888.5 3819.97   1
   8 -10  -5 84905.5 3701.25   4
  -8 -10   5 90731.1 3058.77   2
  -7 -10   5 89171.3 2788.45   2
   7 -10  -5 87152.7 3508.47   4
  -7  10   5 86229.7 3671.90   1
  -6 -10   5 21582.0 1062.48   2
   6 -10  -5 21945.5 1517.01   4
  -6  10   5 19473.7 1579.04   1
   5  10  -5 1165.66 347.708   1
  -5 -10   5 612.327 175.494   2
  -5  10   5 345.116 326.837   1
   4  10  -5 18752.7 1190.77   1
   4 -10  -5 18287.0 1437.10   2
  -4 -10   5 17816.0 728.331   2
  -4  10   5 16429.3 1374.02   1
  -3 -10   5 74980.4 1819.96   2
   3 -10  -5 77800.2 3143.54   2
   3  10  -5 83841.2 2568.58   1
   2  10  -5 153812. 3758.06   1
   2 -10  -5 148934. 4694.60   2
   1  10  -5 101327. 2249.57   2
  -1  10   5 105968. 2930.28   4
   0  10  -5 12459.4 555.269   2
   0  10   5 12058.4 732.411   4
   0  10  -5 12385.2 594.995   1
   0 -10  -5 11690.6 1074.63   2
   1  10   5 21132.1 918.805   4
  -1  10  -5 20287.3 809.149   1
  -1  10  -5 21141.8 863.845   2
  -1 -10  -5 21773.9 1521.18   2
   2  10   5 74725.8 1951.20   4
  -2  10  -5 74114.6 1958.70   1
  -2 -10  -5 75083.8 3050.75   2
  -3 -10  -5 121931. 4271.83   2
  -3  10  -5 120216. 3292.28   2
  -3  10  -5 124800. 3132.74   1
  -4 -10  -5 123353. 4346.71   2
  -4  10  -5 113514. 3430.50   2
  -4  10  -5 119552. 3264.92   1
  -5 -10  -5 58399.0 2889.92   2
  -5  10  -5 56866.1 2160.72   1
  -6 -10  -5 10408.6 1226.62   2
  -6  10  -5 9804.81 890.890   1
  -7 -10  -5 579.818 397.398   2
  -7  10  -5 620.966 236.014   1
  -8 -10  -5 12570.3 1416.02   2
  -8  10  -5 11506.4 1102.62   1
  -9 -10  -5 51876.7 3161.54   2
  -9  10  -5 61054.8 2818.91   1
 -10 -10  -5 83683.2 4213.16   2
 -11 -10  -5 42824.4 3058.48   2
 -12 -10  -5 8639.47 1427.07   2
  15 -11  -5 16837.2 2149.49   4
  14 -11  -5 2972.98 817.450   4
 -14 -11   5 3308.83 863.989   2
 -14  11   5 3669.48 1066.23   1
  13 -11  -5 3021.23 784.651   4
 -13 -11   5 4055.36 856.589   2
 -13  11   5 2088.33 722.921   1
  12 -11  -5 22770.7 2225.44   4
 -12 -11   5 26951.5 2056.72   2
 -12  11   5 29315.6 2504.58   1
  11 -11  -5 34117.0 2642.97   4
 -11  11   5 39680.3 2829.85   1
 -11 -11   5 35183.2 2240.91   2
  10 -11  -5 52165.3 3158.08   4
 -10 -11   5 57780.5 2698.11   2
 -10  11   5 52042.6 3145.43   1
   9 -11  -5 3394.79 706.382   4
  -9 -11   5 3705.76 594.258   2
  -9  11   5 3948.05 847.004   1
  -8 -11   5 1808.63 428.821   2
   8 -11  -5 1168.00 431.411   4
  -8  11   5 1579.86 551.967   1
  -7 -11   5 14334.3 967.150   2
   7 -11  -5 14125.6 1327.47   4
  -7  11   5 13395.4 1391.52   1
  -6 -11   5 53585.4 1858.66   2
  -6  11   5 51921.8 2758.00   1
  -5  11   5 113011. 4249.69   1
   5  11  -5 124405. 3910.91   1
  -5 -11   5 117520. 2972.15   2
  -4  11   5 91271.0 3486.89   1
   4 -11  -5 88914.4 3453.74   2
   4  11  -5 87840.0 2875.25   1
  -3 -11   5 29961.8 1014.84   2
   3  11  -5 29952.6 1462.20   1
   3 -11  -5 27351.1 1794.95   2
  -2  11   5 3203.58 507.608   4
   2 -11  -5 3367.76 656.022   2
  -1  11   5 51180.6 1940.23   4
   1  11  -5 55104.2 1479.72   2
   1 -11  -5 53921.7 2588.56   2
   0  11  -5 103841. 2490.44   2
   0  11   5 104009. 2893.45   4
   0 -11  -5 106430. 3858.43   2
   0  11  -5 104376. 2595.48   1
   1  11   5 37435.6 1407.87   4
  -1 -11  -5 36963.1 2101.63   2
  -1  11  -5 39812.4 1306.80   1
  -1  11  -5 35443.5 1268.57   2
   2  11   5 51758.7 1668.69   4
  -2  11  -5 51580.8 1655.46   1
  -2  11  -5 47113.3 1664.17   2
  -2 -11  -5 50466.4 2550.38   2
  -3 -11  -5 20385.5 1612.89   2
  -3  11  -5 22785.1 1074.84   1
  -3  11  -5 19867.7 1090.74   2
  -4  11  -5 657.356 250.457   1
  -4  11  -5 164.729 153.331   2
  -5 -11  -5 43940.7 2538.12   2
  -5  11  -5 42569.6 1865.84   1
  -6 -11  -5 78523.9 3670.58   2
  -6  11  -5 84428.4 2990.46   1
  -7 -11  -5 79746.4 3750.11   2
  -7  11  -5 77246.8 2994.07   1
  -8 -11  -5 46601.5 2918.62   2
  -8  11  -5 52333.3 2491.91   1
  -9 -11  -5 384.730 415.443   2
 -10 -11  -5 753.700 525.142   2
 -11 -11  -5 21520.3 2168.52   2
 -12 -11  -5 37406.5 3011.97   2
 -14  12   5 35892.0 3063.18   1
  14 -12  -5 29005.3 2790.01   4
 -13 -12   5 17728.4 1745.95   2
 -13  12   5 18184.0 2107.84   1
  13 -12  -5 21803.8 2280.36   4
  12 -12  -5 3707.22 936.040   4
 -12 -12   5 2601.37 629.702   2
 -12  12   5 5103.45 1133.83   1
 -11  12   5 4021.64 904.735   1
  11 -12  -5 4222.51 928.990   4
 -11 -12   5 3786.03 740.579   2
 -10 -12   5 9842.47 1060.07   2
  10 -12  -5 12632.3 1551.61   4
 -10  12   5 15105.4 1682.37   1
  -9 -12   5 49555.4 2305.24   2
   9 -12  -5 49616.1 2883.53   4
  -9  12   5 45481.4 2860.55   1
  -8 -12   5 52753.5 2213.16   2
   8 -12  -5 54293.9 2874.23   4
  -8  12   5 53460.9 3028.76   1
  -7 -12   5 66031.3 2348.19   2
  -7  12   5 66778.1 3294.59   1
  -6 -12   5 41302.5 1632.25   2
  -6  12   5 46684.0 2622.43   1
  -5  12   5 2726.26 647.530   1
  -5 -12   5 4618.90 454.047   2
  -4  12   5 25390.6 1818.13   1
   4 -12  -5 29075.9 1941.38   2
   4  12  -5 30434.2 1627.54   1
  -4 -12   5 24069.0 1017.14   2
  -3  12   5 37097.2 1873.44   4
  -3 -12   5 34340.0 1207.68   2
   3 -12  -5 36438.1 2190.86   2
  -2  12   5 46219.6 2042.19   4
   2 -12  -5 49087.3 2508.08   2
  -1  12   5 44573.0 1844.00   4
   1  12  -5 40419.2 1342.38   2
   1 -12  -5 48031.8 2457.13   2
   0  12  -5 14192.0 774.947   1
   0  12  -5 12033.4 663.205   2
   0  12   5 11922.9 852.971   4
   0 -12  -5 13517.0 1264.41   2
  -1  12  -5 133.984 92.7639   2
   1  12   5 53.5504 120.238   4
  -1  12  -5 390.885 172.907   1
   2  12   5 24881.4 1165.92   4
  -2  12  -5 26152.5 1149.41   1
  -2  12  -5 23433.2 1128.98   2
  -2 -12  -5 25810.9 1822.60   2
  -3  12  -5 82109.0 2494.33   1
  -3 -12  -5 75864.0 3399.33   2
  -4 -12  -5 44554.2 2526.97   2
  -4  12  -5 42900.3 1790.24   1
  -5 -12  -5 21036.3 1760.05   2
  -5  12  -5 21240.4 1295.18   1
  -6  12  -5 3008.00 502.808   1
  -6 -12  -5 3281.31 791.593   2
  -7 -12  -5 435.291 303.009   2
  -8 -12  -5 37547.0 2627.23   2
  -9 -12  -5 41184.1 2870.19   2
 -10 -12  -5 25966.5 2323.09   2
 -11 -12  -5 25216.6 2363.53   2
  14 -13  -5 1094.53 638.833   4
  13 -13  -5 6183.34 1248.74   4
 -13  13   5 4393.17 1078.42   1
 -12  13   5 2564.38 795.853   1
  12 -13  -5 3420.37 982.274   4
 -11  13   5 4875.43 1051.66   1
  11 -13  -5 4272.75 964.941   4
 -10 -13   5 29338.8 1865.45   2
  10 -13  -5 27566.3 2260.79   4
 -10  13   5 29375.7 2403.34   1
  -9 -13   5 5791.28 779.885   2
  -9  13   5 4256.92 866.287   1
  -8  13   5 624.479 436.651   1
  -8 -13   5 688.473 266.871   2
  -7 -13   5 698.960 261.835   2
  -7  13   5 2480.30 684.583   1
  -6  13   5 23287.7 1886.13   1
  -6 -13   5 22633.8 1186.93   2
  -5  13   5 61864.8 3104.36   1
  -5 -13   5 61513.7 1995.90   2
  -4  13   5 39941.8 2401.08   1
  -4 -13   5 35977.7 1367.34   2
  -3 -13   5 2019.46 279.842   2
   3 -13  -5 2273.21 576.598   2
  -2  13   5 161.397 172.098   4
   2 -13  -5-405.768 378.306   2
  -1  13   5 1360.85 344.677   4
   1 -13  -5 1615.55 472.504   2
   0  13  -5 13428.0 814.043   1
   0  13   5 13019.9 932.572   4
   0 -13  -5 12977.0 1305.45   2
  -1  13  -5 33953.7 1389.30   1
  -1 -13  -5 36140.1 2205.82   2
  -2  13  -5 73924.2 2315.87   1
  -2 -13  -5 77204.5 3399.01   2
  -3  13  -5 23150.4 1214.74   1
  -3 -13  -5 23995.4 1870.01   2
  -4 -13  -5 993.109 423.978   2
  -4  13  -5 523.820 204.106   1
  -5 -13  -5 873.650 459.214   2
  -6 -13  -5 6068.84 973.473   2
  -7 -13  -5 22797.4 1998.86   2
  -8 -13  -5 13722.2 1620.90   2
  -9 -13  -5-215.834 469.580   2
 -10 -13  -5 202.635 352.631   2
 -11 -13  -5 3012.77 781.586   2
  13 -14  -5 281.958 555.814   4
 -13  14   5 1028.36 614.546   1
 -12  14   5 2397.04 785.430   1
 -11  14   5 5492.16 1198.65   1
 -10  14   5-97.4015 442.215   1
  -9  14   5 5466.17 1008.20   1
  -8  14   5-27.7036 412.015   1
  -7  14   5 2174.84 582.832   1
  -6 -14   5 7914.78 700.307   2
  -6  14   5 9486.46 1238.71   1
  -5  14   5 854.355 376.344   1
  -5 -14   5 1105.22 275.598   2
  -4  14   5 2677.33 641.191   1
   4 -14  -5 2782.07 737.445   2
  -4 -14   5 2439.96 360.862   2
   3 -14  -5 787.232 368.383   2
   2 -14  -5 611.331 335.605   2
   1 -14  -5 2116.31 578.992   2
   0  14  -5 10742.6 779.334   1
   0 -14  -5 11085.3 1254.20   2
  -1  14  -5 28.2351 139.156   1
  -1 -14  -5 130.915 302.518   2
  -2 -14  -5 8668.42 1101.28   2
  -2  14  -5 7747.94 673.488   1
  -3 -14  -5 1288.53 444.576   2
  -4 -14  -5 642.899 357.155   2
  -5 -14  -5 464.113 355.579   2
  -6 -14  -5 466.161 494.939   2
  -7 -14  -5-381.695 321.323   2
  -8 -14  -5 4226.79 893.314   2
  -9 -14  -5 347.931 408.798   2
 -10 -14  -5 4006.95 1017.77   2
 -12  15   5 6944.58 1359.85   1
 -11  15   5 8764.55 1422.23   1
 -10  15   5 9035.24 1441.19   1
  -9  15   5 6976.68 1200.05   1
  -8  15   5 1713.63 583.033   1
  -7  15   5 1129.89 566.971   1
  -6  15   5 2097.52 640.160   1
  -5  15   5 1957.82 599.575   1
  -4  15   5 9813.95 1268.61   1
   4 -15  -5 8578.90 1186.74   2
   3 -15  -5 2238.19 615.172   2
   2 -15  -5 4201.95 772.544   2
   1 -15  -5 23830.3 1874.08   2
   0  15  -5 51282.9 1980.27   1
   0 -15  -5 56251.4 2981.18   2
  -1 -15  -5 42922.2 2609.49   2
  -2 -15  -5 10950.7 1282.06   2
  -3 -15  -5-622.947 607.486   2
  -4 -15  -5 131.606 439.707   2
  -5 -15  -5 2278.54 639.347   2
  -6 -15  -5 11574.7 1440.42   2
  -7 -15  -5 7446.68 1195.07   2
  -8 -15  -5 12389.1 1578.26   2
  -9 -15  -5 3350.05 1031.23   2
 -11  16   5 817.296 448.216   1
 -10  16   5 4772.45 1113.05   1
  -9  16   5 16399.5 1868.94   1
  -8  16   5 28789.2 2390.07   1
  -7  16   5 29790.3 2380.14   1
  -6  16   5 11477.7 1421.60   1
  -5  16   5 6043.31 1063.48   1
  -4  16   5 2978.66 733.367   1
   4 -16  -5 2439.51 650.044   2
   3 -16  -5 27471.1 2131.68   2
   2 -16  -5 64358.7 3325.23   2
   1 -16  -5 65127.1 3293.56   2
   0 -16  -5 10469.1 1282.60   2
  -1 -16  -5-441.797 549.295   2
  -2 -16  -5 7144.85 1060.30   2
  -3 -16  -5 19100.1 1772.65   2
  -4 -16  -5 21808.5 1941.67   2
  -5 -16  -5 11241.6 1421.37   2
  -6 -16  -5 377.228 397.751   2
  -7 -16  -5-182.968 518.988   2
  -8 -16  -5 12419.4 1656.24   2
 -10  17   5 53304.3 3589.33   1
  -9  17   5 13356.8 1707.77   1
  -8  17   5-62.7417 490.604   1
  -7  17   5 10879.1 1477.96   1
  -6  17   5 48344.2 3088.92   1
  -5  17   5 69507.1 3689.47   1
   4 -17  -5 51669.0 3093.52   2
  -4  17   5 52828.8 3122.66   1
  -3  17   5 20380.0 1902.56   1
   3 -17  -5 19530.5 1860.53   2
   2 -17  -5 5174.52 946.763   2
   1 -17  -5 6450.21 1052.22   2
   0 -17  -5 38607.6 2572.39   2
  -1 -17  -5 48035.6 2921.58   2
  -2 -17  -5 41558.8 2716.68   2
  -3 -17  -5 5738.20 962.120   2
  -4 -17  -5 2401.48 647.857   2
  -5 -17  -5 18464.2 1895.09   2
  -6 -17  -5 26822.2 2356.55   2
  -7 -17  -5 35406.2 2747.57   2
  -8 -17  -5 29519.6 2569.76   2
  -9  18   5 36161.2 2920.06   1
  -8  18   5 21971.3 2204.84   1
  -7  18   5 21970.6 2182.09   1
  -6  18   5 18932.1 1968.22   1
  -5  18   5 1218.79 586.337   1
   4 -18  -5 17583.9 1814.64   2
  -4  18   5 14090.1 1642.88   1
  -3  18   5 34191.1 2579.23   1
   3 -18  -5 36576.7 2603.19   2
   2 -18  -5 56991.4 3297.26   2
   1 -18  -5 54937.0 3203.38   2
   0 -18  -5 16603.7 1700.95   2
  -1 -18  -5-239.312 473.762   2
  -2 -18  -5 13320.2 1557.25   2
  -3 -18  -5 50327.8 3128.87   2
  -4 -18  -5 31106.4 2464.06   2
  -5 -18  -5 17336.3 1861.33   2
  -6 -18  -5 12256.3 1608.62   2
  -7  19   5 514.383 533.177   1
  -6  19   5 15483.5 1818.84   1
  -5  19   5 50809.5 3308.69   1
  -4  19   5 37508.6 2761.60   1
   3 -19  -5 6441.22 1164.86   2
  -3  19   5 3883.86 842.468   1
   2 -19  -5-998.656 682.425   2
   1 -19  -5 4976.84 1027.53   2
   0 -19  -5 13099.2 1633.75   2
  -1 -19  -5 16177.7 1759.08   2
  -2 -19  -5 23484.1 2174.57   2
  -3 -19  -5 10204.5 1398.86   2
  -4 -19  -5 1357.43 546.273   2
  -5 -19  -5 14651.0 1766.75   2
  -5  20   5-142.592 393.830   1
  -4  20   5 8947.12 1359.02   1
  -3  20   5 15804.8 1806.74   1
   3 -20  -5 17325.4 1898.96   2
   2 -20  -5 16368.0 1803.99   2
   1 -20  -5 7784.02 1252.32   2
   0 -20  -5 2534.00 706.765   2
  -1 -20  -5-3.23787 425.974   2
  -2 -20  -5-645.288 603.479   2
  -3 -20  -5 4983.76 1044.72   2
   3 -21  -5 1517.07 787.058   2
   2 -21  -5 2783.89 799.947   2
   1 -21  -5-361.457 389.278   2
   0 -21  -5 335.356 492.080   2
 -17   0   6 590.298 724.547   1
 -16   0   6 3965.98 1066.01   1
 -15   0   6 23427.7 2409.20   1
 -14   0   6 52128.7 2726.64   3
 -14   0   6 51463.8 3537.86   1
 -13   0   6 31140.4 2101.22   3
 -13   0   6 32333.0 2662.09   1
 -12   0   6 10105.2 1420.91   1
 -12   0   6 9949.13 1291.55   3
 -11   0   6 43767.0 2851.59   1
 -10   0   6 35408.7 2428.20   1
  -9   0   6 97379.0 4021.50   1
  -8   0   6 174053. 5552.22   1
  -7   0   6 251037. 6671.83   1
  -7   0   6 234811. 5842.95   2
   6   0  -6 153270. 4388.61   1
  -6   0   6 166192. 4782.91   1
  -6   0   6 162042. 4189.94   2
  -5   0   6 5292.50 631.531   1
   5   0  -6 4871.80 553.166   1
  -5   0   6 5074.19 514.995   2
  -4   0   6 30956.6 1478.13   1
  -4   0   6 30686.4 1281.88   2
  -3   0   6 278985. 5943.76   2
  -3   0   6 268121. 6093.53   1
   3   0  -6 275417. 5918.95   2
  -2   0   6 602184. 12002.9   2
  -2   0   6 587079. 12014.7   1
  -1   0   6 341053. 7170.82   1
  -1   0   6 353170. 7352.40   2
   1   0  -6 355371. 7271.30   2
   0   0  -6 24227.6 1107.25   2
   0   0   6 22458.3 1118.79   2
  -1   0  -6 62633.0 2071.70   2
  -2   0  -6 90804.8 2795.63   2
  -2   0  -6 93574.9 2494.97   4
  -3   0  -6 162235. 3948.95   4
  -3   0  -6 159311. 4327.31   2
  -4   0  -6 159002. 4059.95   4
   4   0   6 164841. 4992.61   3
  -5   0  -6 26753.5 1640.72   2
   5   0   6 32659.0 1858.45   3
   5   0   6 32173.7 1781.48   1
   6   0   6-99.1995 356.651   3
  -6   0  -6 370.999 284.651   2
  -7   0  -6 19296.1 1579.90   2
   7   0   6 19006.6 1254.48   3
  -8   0  -6 58158.3 2960.33   2
  -9   0  -6 192198. 6225.97   2
  10   0   6 69858.2 3022.80   4
  11   0   6 37991.8 2277.31   4
  12   0   6 3565.38 708.959   4
  13   0   6 4164.76 833.620   4
 -13   0  -6 4259.39 1046.83   2
 -14   0  -6 32565.8 2763.31   2
 -17  -1   6 32765.0 3041.83   1
 -17   1   6 32917.3 3090.64   1
 -16   1   6 17162.1 2192.21   1
 -16  -1   6 18206.5 2184.50   1
 -15   1   6 9743.81 1619.16   1
 -15  -1   6 14049.3 1907.73   1
 -14   1   6 702.274 602.400   1
 -14   1   6-67.1190 312.433   3
 -14  -1   6-175.144 419.421   3
 -14  -1   6 1348.67 805.964   1
 -13   1   6 15999.8 1542.64   3
 -13  -1   6 13908.2 1370.72   3
 -13  -1   6 13880.8 1754.27   1
 -13   1   6 16654.6 1913.01   1
 -12  -1   6 101654. 4102.26   3
 -12  -1   6 104853. 4824.10   1
 -12   1   6 103080. 4807.12   1
 -11  -1   6 81254.5 3627.60   3
 -11  -1   6 81357.7 4041.77   1
 -11   1   6 82184.7 4013.80   1
 -10   1   6 25211.7 2023.89   1
 -10  -1   6 27603.1 2055.96   3
 -10  -1   6 24278.6 2000.36   1
  -9  -1   6 1479.39 642.151   1
  -9  -1   6 1678.52 685.936   3
  -9   1   6 1253.65 590.432   1
  -8  -1   6 31382.2 2084.22   1
  -8   1   6 32236.3 2034.30   1
  -7  -1   6 129950. 4299.26   1
  -7  -1   6 115230. 3446.54   2
  -7   1   6 124606. 4184.27   1
  -6  -1   6 155002. 4568.52   1
  -6   1   6 153979. 4518.86   1
   6   1  -6 144330. 4145.79   1
  -6  -1   6 146891. 3848.69   2
  -6   1   6 145280. 3997.31   2
   5   1  -6 66376.7 2344.43   1
  -5  -1   6 75335.2 2714.05   1
   5  -1  -6 66730.7 2450.27   1
  -5  -1   6 70710.8 2174.52   2
  -5   1   6 72806.6 2625.58   1
  -5   1   6 74311.8 2391.34   2
  -4   1   6 83786.4 2716.08   1
   4   1  -6 83655.6 2505.17   1
  -4  -1   6 84967.3 2716.62   1
  -4  -1   6 82545.5 2312.39   2
  -4   1   6 83337.7 2512.99   2
  -3  -1   6 19373.4 894.991   2
  -3   1   6 18868.0 1055.24   1
   3  -1  -6 18492.3 998.149   2
  -3  -1   6 19644.8 1043.28   1
  -3   1   6 19930.8 1031.61   2
  -2   1   6-35.1336 157.972   1
  -2   1   6 548.218 206.633   2
  -2  -1   6 542.919 177.488   2
   2   1  -6 294.189 193.881   2
   2  -1  -6 513.503 207.540   2
  -1  -1   6 165598. 3769.10   1
  -1   1   6 169427. 4162.95   2
  -1  -1   6 171864. 3919.08   2
   1   1  -6 175929. 3861.73   2
   1  -1  -6 161381. 4048.79   2
   0  -1  -6 283729. 6259.48   2
   0   1  -6 276869. 5995.88   2
   0   1   6 289823. 6413.63   2
  -1  -1  -6 214348. 5137.72   2
  -1   1  -6 210537. 4900.42   2
  -1  -1  -6 216194. 4499.43   4
   1   1   6 224713. 5339.77   2
  -2  -1  -6 90505.3 2851.40   2
  -2  -1  -6 93779.8 2350.56   4
  -2   1  -6 92880.0 2749.59   2
  -2   1  -6 91876.4 2617.11   4
   2  -1   6 93704.0 3669.52   3
  -3   1  -6 29060.0 1315.18   4
  -3  -1  -6 29604.5 1537.09   2
  -3   1  -6 30539.7 1475.82   2
   3  -1   6 33612.2 1979.10   3
  -4   1  -6 30876.2 1470.38   4
  -4  -1  -6 28317.3 1588.24   2
  -4   1  -6 29303.6 1557.57   2
   4  -1   6 30602.9 1841.00   3
   4  -1   6 31247.6 1593.95   1
  -5   1  -6 65098.2 2503.18   4
  -5  -1  -6 68687.1 2786.63   2
  -5   1  -6 67920.8 2715.35   2
   5  -1   6 72192.2 2862.52   3
   5  -1   6 71515.0 2791.32   1
  -6  -1  -6 43868.0 2257.21   2
   6   1   6 46237.4 2214.45   3
  -6   1  -6 47584.6 2303.82   2
   6  -1   6 45461.0 2130.01   3
  -7  -1  -6 77272.0 3282.32   2
   7   1   6 82159.8 2946.97   3
   8   1   6 42962.4 2010.61   4
  -8  -1  -6 41973.6 2488.71   2
   8   1   6 43771.8 1919.04   3
   9   1   6 4942.54 710.741   4
  -9  -1  -6 8928.11 1160.45   2
 -10  -1  -6 12699.3 1487.26   2
  10   1   6 11502.4 1127.94   4
  11   1   6 19259.1 1554.99   4
 -11  -1  -6 17501.3 1807.55   2
  12   1   6 32306.7 2138.91   4
 -12  -1  -6 33656.4 2655.21   2
  12  -1   6 34210.3 2267.11   4
 -13  -1  -6 38905.7 2986.87   2
  13  -1   6 42734.6 2675.71   4
 -14  -1  -6 16278.9 1994.52   2
 -17   2   6-900.938 745.408   1
  17  -2  -6-237.837 591.464   4
 -16   2   6 2967.20 961.636   1
 -16  -2   6 2092.20 863.865   1
 -15   2   6 7214.12 1357.88   1
 -15  -2   6 7714.81 1430.30   1
 -14  -2   6 22118.2 2250.78   1
 -14   2   6 22119.6 2279.24   1
 -13  -2   6 25575.7 1852.05   3
 -13  -2   6 27656.0 2426.50   1
 -13   2   6 28877.6 2501.64   1
 -12  -2   6 4971.26 982.980   1
 -12   2   6 4951.46 989.467   1
 -12  -2   6 3910.18 753.348   3
 -11  -2   6 8421.57 1308.97   1
 -11   2   6 6640.75 1084.82   1
 -11  -2   6 7942.41 1036.62   3
 -10   2   6 14539.2 1510.63   1
 -10  -2   6 13668.1 1410.14   3
 -10  -2   6 14432.2 1560.41   1
  -9   2   6 45455.0 2583.56   1
  -9  -2   6 41638.5 2575.23   3
  -9  -2   6 43540.5 2613.68   1
  -8   2   6 37713.4 2204.98   1
  -8  -2   6 35690.5 2334.14   3
  -8  -2   6 36172.2 2231.04   1
  -7  -2   6 12205.0 1406.12   3
  -7   2   6 11743.8 1117.95   1
  -7  -2   6 11763.2 1161.57   1
  -6   2   6 2063.85 462.020   1
   6   2  -6 1382.18 343.728   1
  -6  -2   6 2900.07 591.031   1
  -6  -2   6 2484.33 738.940   3
  -6  -2   6 1583.39 293.544   2
  -6   2   6 2255.84 428.172   2
   5   2  -6 60.2614 143.578   1
  -5  -2   6 194.971 278.275   1
  -5   2   6-301.418 292.807   1
  -5  -2   6 233.071 111.005   2
  -5   2   6 408.554 171.185   2
  -4  -2   6 5252.03 593.659   1
  -4   2   6 5461.01 619.618   1
   4   2  -6 6288.80 552.637   1
  -4  -2   6 6289.35 1049.63   3
  -4  -2   6 6145.14 468.857   2
  -4   2   6 5603.96 567.563   2
  -3  -2   6 88695.1 2198.53   2
  -3  -2   6 90054.8 2610.75   1
   3  -2  -6 85931.9 2627.74   2
  -3   2   6 84608.3 2686.24   1
  -3   2   6 86147.9 2634.11   2
  -2   2   6 72445.2 2317.68   2
  -2  -2   6 68953.3 1853.56   2
  -2  -2   6 63255.4 3137.55   3
  -2  -2   6 73336.6 2041.07   1
   2   2  -6 67881.4 1801.21   2
   2  -2  -6 72378.2 2294.75   2
  -2   2   6 67684.1 2249.36   1
  -1  -2   6 38265.6 1198.63   1
  -1   2   6 37686.4 1590.97   2
  -1  -2   6 35002.9 2223.68   3
  -1  -2   6 38879.5 1295.82   2
   1   2  -6 38109.2 1213.04   2
   1  -2  -6 38505.0 1567.86   2
   0   2  -6 8634.38 549.113   2
   0   2   6 7953.42 708.761   2
   0  -2   6 8880.62 1101.66   3
   0  -2   6 8102.11 445.688   1
   0  -2  -6 7933.17 698.525   2
  -1  -2  -6 5169.87 573.556   2
  -1   2  -6 5077.00 464.495   2
  -1  -2  -6 5066.38 310.252   4
   1   2   6 5793.09 647.247   2
  -2  -2  -6 34465.3 1640.60   2
  -2   2  -6 35020.6 1485.36   4
  -2   2  -6 35569.3 1454.37   2
   2  -2   6 37290.5 2122.73   3
  -3  -2  -6 80324.2 2856.34   2
  -3   2  -6 83367.6 2627.25   4
  -3   2  -6 81063.8 2632.97   2
   3  -2   6 87945.8 3382.37   3
   3  -2   6 84895.2 2617.09   1
  -4   2  -6 75630.1 2590.68   4
  -4   2  -6 77884.3 2718.58   2
   4  -2   6 81795.2 3129.88   3
   4  -2   6 78134.9 2718.45   1
  -5   2  -6 21711.4 1357.35   4
  -5  -2  -6 20553.3 1463.16   2
   5  -2   6 22362.4 1474.54   3
  -5   2  -6 21073.2 1406.11   2
   5  -2   6 20413.7 1393.49   1
   6  -2   6 6328.00 854.074   1
  -6  -2  -6 8934.92 983.662   2
   7   2   6-58.7165 335.161   3
  -7  -2  -6-53.7366 323.909   2
   8   2   6 27049.5 1509.86   4
  -8  -2  -6 23841.6 1914.84   2
   8   2   6 28860.4 1533.22   3
   9   2   6 61883.9 2579.02   4
  -9  -2  -6 64147.6 3235.88   2
  10   2   6 24712.6 1636.92   4
 -10  -2  -6 20757.5 1881.58   2
  11   2   6 5415.11 787.105   4
 -11  -2  -6 5931.60 1084.49   2
 -12  -2  -6-5.48290 512.815   2
 -13  -2  -6 3946.07 923.660   2
 -16   3   6 5812.02 1266.97   1
  16  -3  -6 4541.17 1214.19   4
 -15   3   6 2676.82 807.471   1
 -15  -3   6 1518.99 680.931   1
  15  -3  -6 1960.44 789.086   4
 -14   3   6-346.882 564.192   1
 -14  -3   6 292.741 602.050   1
 -13   3   6-198.395 444.285   1
 -13  -3   6 258.673 571.085   1
 -12   3   6 1124.70 562.316   1
 -12  -3   6 1013.53 365.556   3
 -11   3   6 4613.01 943.191   1
 -11  -3   6 3743.41 686.721   3
 -11  -3   6 5478.11 992.558   1
 -10  -3   6 1677.24 583.716   1
 -10  -3   6 838.337 377.997   3
 -10   3   6 2321.56 641.646   1
  -9  -3   6-264.259 389.510   1
  -9  -3   6 298.939 313.161   3
  -9   3   6 80.3312 301.798   1
  -8  -3   6 5975.50 902.070   1
  -8  -3   6 5036.05 908.560   3
  -8   3   6 5344.67 821.030   1
  -7  -3   6 17004.8 1586.31   3
  -7   3   6 17503.7 1368.57   1
  -7  -3   6 17268.5 1426.60   1
   6   3  -6 7573.82 737.428   1
  -6  -3   6 7392.84 1070.59   3
  -6  -3   6 7601.86 911.496   1
  -6   3   6 8572.83 888.077   1
  -5   3   6 14068.5 1078.66   1
   5   3  -6 14502.7 939.655   1
  -5  -3   6 13991.6 1458.27   3
  -5  -3   6 14154.2 748.713   2
  -5   3   6 15479.5 1055.37   2
  -5  -3   6 12812.2 1049.11   1
  -4   3   6 4014.61 506.312   2
  -4  -3   6 3803.45 536.206   1
  -4  -3   6 3899.61 798.409   3
   4  -3  -6 3856.13 512.679   2
  -4  -3   6 4432.56 355.454   2
  -4   3   6 4470.93 561.254   1
   4   3  -6 3878.23 421.568   1
  -3   3   6 13738.4 929.535   2
  -3  -3   6 12051.7 810.352   1
  -3  -3   6 13245.4 574.147   2
  -3   3   6 12124.5 898.584   1
  -3  -3   6 11718.3 1298.69   3
   3  -3  -6 12518.2 895.781   2
  -2   3   6 7915.06 708.812   2
  -2  -3   6 7764.28 560.391   1
  -2  -3   6 8051.65 1073.35   3
   2  -3  -6 7880.05 698.754   2
  -2  -3   6 8256.29 428.031   2
  -1   3   6 15841.8 1019.28   2
  -1  -3   6 15178.8 639.182   1
  -1  -3   6 13471.7 1331.53   3
   1   3  -6 16881.2 641.966   2
   1  -3  -6 15240.6 981.361   2
   0   3  -6 2617.08 269.500   2
   0  -3   6 2383.17 188.880   1
   0  -3  -6 2889.95 428.702   2
   0   3   6 2402.30 442.217   2
   0  -3   6 3081.04 657.844   3
  -1  -3  -6 2428.74 413.727   2
  -1   3  -6 2417.10 282.295   2
   1  -3   6 2820.10 571.789   3
   1   3   6 2423.54 446.373   2
   1  -3   6 2199.66 238.595   1
   2  -3   6-52.0053 104.573   1
  -2  -3  -6 376.077 228.335   2
  -2   3  -6 177.839 178.279   2
   2  -3   6 105.615 301.689   3
  -3  -3  -6 6753.77 728.308   2
  -3   3  -6 5724.14 624.489   4
  -3   3  -6 5319.55 577.671   2
   3  -3   6 5905.45 764.874   3
   3  -3   6 5307.32 532.651   1
   4  -3   6-94.0441 180.562   1
  -4   3  -6 275.023 204.644   4
  -4  -3  -6 54.2516 209.742   2
   4  -3   6-405.052 342.041   3
  -4   3  -6 166.739 193.125   2
   5  -3   6 130.822 228.693   1
  -5  -3  -6 277.912 254.384   2
   6  -3   6 876.677 290.287   1
  -6  -3  -6 1352.49 452.550   2
   7   3   6 5140.44 569.645   4
  -7  -3  -6 5240.24 816.277   2
   8   3   6 4068.05 535.744   4
   8   3   6 4554.78 659.069   3
  -8  -3  -6 3094.22 751.644   2
   9   3   6 3490.92 562.200   4
  -9  -3  -6 4152.60 850.331   2
  10   3   6 1672.32 437.436   4
 -10  -3  -6 2046.32 650.252   2
  11   3   6 4663.17 737.516   4
 -11  -3  -6 4921.89 1006.45   2
 -12  -3  -6 4170.44 1085.72   2
 -13  -3  -6 3166.91 928.535   2
 -16   4   6 326.433 550.763   1
  16  -4  -6 9.03711 530.631   4
 -15   4   6 361.051 454.967   1
  15  -4  -6 1465.56 785.340   4
 -14   4   6 5088.36 1145.73   1
  14  -4  -6 5952.48 1338.25   4
  13  -4  -6 5191.20 1223.85   4
 -13   4   6 4398.32 1002.24   1
 -13  -4   6 4215.61 1061.24   1
 -12   4   6 1250.32 634.317   1
 -12  -4   6 1408.98 543.368   1
 -11   4   6 22629.7 1994.40   1
 -11  -4   6 22976.0 1759.19   3
 -11  -4   6 21994.1 1965.95   1
 -10  -4   6-141.835 454.318   3
 -10   4   6 152.358 448.342   1
 -10  -4   6 915.031 451.276   1
  -9  -4   6 349.381 396.209   3
  -9  -4   6 1046.08 478.326   1
  -9   4   6 1735.29 555.406   1
  -8   4   6 877.507 529.262   1
  -8  -4   6 646.512 328.485   3
  -8  -4   6 451.152 327.271   1
  -7   4   6 8194.98 930.361   1
  -7  -4   6 7922.72 1089.81   3
  -7  -4   6 7888.31 949.878   1
  -6   4   6 14374.8 1184.28   1
  -6  -4   6 12151.7 1324.13   3
  -6  -4   6 12914.5 1124.10   1
   6   4  -6 13166.8 983.250   1
   5   4  -6 27380.3 1324.23   1
  -5  -4   6 27063.2 1979.15   3
  -5   4   6 26813.2 1560.78   1
  -5  -4   6 29184.4 1061.94   2
  -5  -4   6 25944.4 1509.20   1
   4   4  -6 7150.50 564.452   1
  -4  -4   6 5680.37 919.266   3
   4  -4  -6 7702.80 750.328   2
  -4  -4   6 7248.59 701.549   1
  -4  -4   6 8348.72 432.033   2
  -4   4   6 7612.59 774.770   1
  -3   4   6 42065.1 1825.19   2
  -3  -4   6 41625.9 1020.10   2
   3   4  -6 40677.2 1298.09   1
  -3  -4   6 39988.4 2384.28   3
  -3   4   6 42743.2 1848.10   1
   3  -4  -6 42719.7 1837.89   2
  -3  -4   6 39650.0 1501.15   1
  -2   4   6 17746.7 1138.41   2
  -2  -4   6 16572.0 1481.91   3
  -2  -4   6 16520.6 713.244   1
   2  -4  -6 17240.9 1099.37   2
   1  -4  -6 1978.40 189.635   4
  -1   4   6 1765.05 345.596   2
  -1  -4   6 1134.56 392.120   3
   1   4  -6 1490.47 137.107   2
   1  -4  -6 2076.57 394.480   2
   0   4  -6 5391.71 342.148   2
   0  -4  -6 5263.60 625.070   2
  -1  -4  -6 1136.30 327.633   2
  -1   4  -6 1143.75 207.599   2
   1  -4   6 1166.51 411.530   3
  -2  -4  -6-112.559 234.543   2
   2  -4   6-214.416 337.298   3
  -2   4  -6 232.695 179.553   2
   2  -4   6 322.245 94.3446   1
  -3  -4  -6 23196.0 1447.70   2
   3  -4   6 20705.4 989.099   1
  -3   4  -6 22184.8 1185.37   2
   3  -4   6 24486.7 1647.05   3
  -4  -4  -6 34532.7 1860.95   2
   4  -4   6 28479.7 1388.17   1
  -5  -4  -6 7877.31 924.312   2
   5  -4   6 7007.91 743.947   1
   6   4   6 1252.50 257.767   4
  -6  -4  -6 839.375 408.528   2
   6  -4   6 1152.45 368.334   1
   7   4   6-4.10456 166.860   4
  -7  -4  -6 377.122 390.090   2
   8   4   6 133.733 240.545   4
  -8  -4  -6 670.069 497.418   2
   9   4   6 6563.66 769.621   4
  -9  -4  -6 8246.50 1139.06   2
  10   4   6 2131.12 464.602   4
 -10  -4  -6 1370.74 536.240   2
 -11  -4  -6 339.657 360.489   2
 -12  -4  -6-561.565 508.376   2
 -13  -4  -6-873.597 715.557   2
 -16   5   6 6095.15 1310.12   1
  16  -5  -6 6576.27 1451.52   4
  15  -5  -6 2754.36 968.746   4
 -15   5   6 3368.12 964.139   1
  14  -5  -6 1497.40 811.706   4
 -14   5   6-406.618 630.130   1
  13  -5  -6 13674.3 1805.56   4
 -13   5   6 10971.2 1542.92   1
 -12   5   6 56798.1 3396.78   1
  12  -5  -6 57339.8 3554.99   4
  11  -5  -6 29670.1 2424.25   4
 -11   5   6 30634.1 2352.39   1
  10  -5  -6 5776.50 1077.56   4
 -10  -5   6 4361.83 892.667   1
 -10   5   6 5424.58 958.592   1
   9  -5  -6 8922.74 1235.29   4
  -9   5   6 10826.6 1234.54   1
  -9  -5   6 8066.33 1040.33   3
  -9  -5   6 9631.40 1174.04   1
  -8  -5   6-355.596 446.082   3
  -8   5   6 922.644 415.904   1
  -8  -5   6 268.756 406.634   1
  -7  -5   6 26121.3 1933.23   3
  -7  -5   6 23732.4 1678.63   1
  -6   5   6 51795.7 2413.01   1
  -6  -5   6 46342.0 2651.16   3
   6   5  -6 52856.5 2127.87   1
  -6  -5   6 50107.8 2304.45   1
   5  -5  -6 18425.4 1310.70   4
  -5   5   6 15589.6 1208.38   1
  -5  -5   6 15488.0 1470.00   3
  -5  -5   6 16502.2 721.259   2
  -5  -5   6 17952.7 1183.75   1
   5   5  -6 16542.4 1008.12   1
   4   5  -6 40689.5 1492.65   1
  -4   5   6 42968.0 1993.50   1
   4  -5  -6 39287.0 1773.19   4
  -4  -5   6 37197.7 2351.11   3
   4  -5  -6 38841.6 1878.74   2
  -4  -5   6 43711.5 1056.44   2
   3  -5  -6 21264.7 1082.02   4
  -3  -5   6 16719.0 1535.77   3
   3   5  -6 19706.7 803.726   1
   3  -5  -6 20424.6 1279.44   2
  -3   5   6 19399.0 1254.58   1
   2  -5  -6 83.6860 96.0441   4
  -2  -5   6-167.362 391.087   3
  -1  -5   6 42254.9 2427.96   3
   1  -5  -6 46435.6 1973.01   2
   0   5  -6 53421.1 1293.37   2
   0  -5   6 57926.5 2788.77   3
   0  -5  -6 57910.5 2280.19   2
  -1  -5  -6 47868.4 2104.99   2
   1  -5   6 51230.0 2593.90   3
  -1   5  -6 46849.7 1405.42   2
  -2  -5  -6 1312.56 376.164   2
  -2   5  -6 1465.43 272.408   2
  -3  -5  -6 1159.02 372.509   2
   3  -5   6 786.990 154.929   1
  -4  -5  -6 9529.34 1009.98   2
   4  -5   6 10086.3 697.305   1
  -5  -5  -6 41283.6 2244.35   2
   5  -5   6 42811.0 1798.62   1
  -6  -5  -6 42564.7 2367.30   2
   6   5   6 44384.6 1518.39   4
   6  -5   6 39223.6 1938.07   1
   7   5   6 46130.6 1738.93   4
  -7  -5  -6 49739.3 2649.85   2
   8   5   6 36495.0 1664.85   4
  -8  -5  -6 37509.8 2378.42   2
   9   5   6 11845.7 983.895   4
  -9  -5  -6 10703.2 1323.47   2
 -10  -5  -6 8434.27 1249.08   2
 -11  -5  -6 6318.33 1147.01   2
 -12  -5  -6 5849.68 1120.03   2
 -13  -5  -6 14771.3 1840.59   2
 -16   6   6 8487.57 1556.21   1
  16  -6  -6 7870.05 1546.73   4
 -15   6   6 20927.3 2304.74   1
  15  -6  -6 15565.9 2064.49   4
 -14   6   6 40723.9 3100.82   1
  14  -6  -6 39465.6 3198.09   4
 -13   6   6 41628.4 3005.06   1
  13  -6  -6 38117.5 3011.29   4
  12  -6  -6 16069.1 1884.37   4
 -12   6   6 16392.1 1790.86   1
  11  -6  -6 13791.0 1626.52   4
 -11   6   6 15124.8 1670.82   1
  10  -6  -6 8309.40 1241.08   4
 -10   6   6 11392.1 1333.40   1
   9  -6  -6 26117.8 2105.03   4
  -9   6   6 30651.9 2080.03   1
   8  -6  -6 52597.1 2854.59   4
  -8   6   6 62507.6 2956.70   1
  -7   6   6 70145.8 3065.87   1
   7  -6  -6 70753.5 3122.01   4
   6  -6  -6 23004.0 1569.72   4
  -6   6   6 21351.3 1524.54   1
   6   6  -6 23388.2 1379.22   1
  -6  -6   6 23058.9 1835.25   3
  -5   6   6 5780.53 733.554   1
   5  -6  -6 5361.18 690.952   4
   5   6  -6 5580.07 581.701   1
  -5  -6   6 5659.42 835.913   3
   4  -6  -6 32679.0 1537.36   4
  -4   6   6 31468.0 1724.02   1
  -4  -6   6 29773.9 2099.72   3
   4  -6  -6 31945.7 1722.59   2
   4   6  -6 33320.0 1317.85   1
   3   6  -6 170860. 3746.65   1
   3  -6  -6 174904. 4136.97   4
  -3   6   6 176760. 4875.26   1
  -3  -6   6 165559. 5585.05   3
   3  -6  -6 175875. 4832.10   2
   2  -6  -6 227694. 4773.46   4
   2  -6  -6 229678. 5874.49   2
   1  -6  -6 150593. 4346.74   2
   0  -6  -6 3034.05 504.287   2
  -1  -6  -6 58885.6 2442.45   2
  -1   6  -6 55786.8 1536.72   2
  -2  -6  -6 62796.0 2595.33   2
  -3  -6  -6 122077. 4012.88   2
  -4  -6  -6 116727. 3987.61   2
   4  -6   6 111148. 2781.04   1
   5  -6   6 20014.7 1069.08   1
  -5  -6  -6 20597.4 1561.50   2
   5   6   6 18920.9 728.219   4
   6   6   6 651.377 161.862   4
  -6  -6  -6 894.528 399.691   2
   6  -6   6 787.561 282.756   1
   7   6   6 3408.43 425.873   4
  -7  -6  -6 4441.67 811.376   2
  -8  -6  -6 18986.7 1701.68   2
   8   6   6 17229.4 1077.33   4
  -9  -6  -6 56928.1 3165.80   2
 -10  -6  -6 27076.4 2244.71   2
 -11  -6  -6 11443.9 1491.04   2
 -12  -6  -6 1204.04 570.895   2
 -13  -6  -6 2689.21 874.072   2
  16  -7  -6 28751.6 2898.27   4
 -16   7   6 26878.3 2781.66   1
 -15   7   6 21433.5 2394.01   1
  15  -7  -6 16506.4 2112.03   4
  14  -7  -6 1089.46 837.904   4
 -14   7   6 1246.55 759.153   1
 -13   7   6 21942.0 2195.87   1
  13  -7  -6 23078.8 2321.88   4
  12  -7  -6 74843.6 4228.73   4
 -12   7   6 83640.4 4210.03   1
  11  -7  -6 92025.7 4447.46   4
 -11   7   6 99464.2 4498.18   1
  10  -7  -6 51462.0 3105.56   4
 -10   7   6 63023.5 3288.97   1
   9  -7  -6 19975.1 1778.09   4
  -9   7   6 23370.0 1861.44   1
  -8   7   6 1411.52 429.456   1
   8  -7  -6 878.448 465.317   4
  -7   7   6 22334.6 1655.17   1
   7  -7  -6 17187.1 1447.23   4
   6   7  -6 84615.5 3000.34   1
  -6   7   6 85997.5 3384.10   1
  -6  -7   6 91783.6 2441.23   2
   6  -7  -6 82798.3 3203.60   4
  -5  -7   6 156311. 3262.92   2
   5  -7  -6 161331. 4464.11   4
   5   7  -6 147523. 4086.59   1
  -5   7   6 152003. 4750.97   1
   4  -7  -6 105479. 3093.95   4
  -4   7   6 102866. 3569.03   1
   4   7  -6 100056. 2808.45   1
   4  -7  -6 103644. 3569.71   2
  -3   7   6 56197.8 2440.67   1
   3  -7  -6 55184.9 1835.67   4
   3  -7  -6 55782.3 2383.20   2
   3   7  -6 53041.9 1567.43   1
   2  -7  -6 17.8720 249.435   2
   1  -7  -6 88850.8 3185.28   2
   0  -7  -6 160054. 4667.33   2
  -1   7  -6 104645. 2367.18   2
  -1  -7  -6 108735. 3584.22   2
  -2  -7  -6 79803.9 3086.10   2
  -3  -7  -6 8572.07 927.177   2
  -4  -7  -6 36550.0 2081.06   2
  -5  -7  -6 79217.5 3350.74   2
   5   7   6 78934.8 1884.75   4
   5  -7   6 82600.4 2380.60   1
  -6  -7  -6 83803.8 3561.10   2
   6   7   6 81034.5 2200.69   4
  -7  -7  -6 98325.5 4039.28   2
   7   7   6 91680.3 2661.30   4
  -8  -7  -6 59166.1 3170.39   2
  -9  -7  -6-54.0602 378.371   2
 -10  -7  -6 10293.7 1395.78   2
 -11  -7  -6 29225.9 2496.06   2
 -12  -7  -6 61874.6 3770.89   2
  16  -8  -6 7738.89 1519.51   4
 -15   8   6 35403.2 3061.79   1
  15  -8  -6 33560.0 3043.69   4
 -14   8   6 60230.7 3885.16   1
  14  -8  -6 67422.9 4175.72   4
  13  -8  -6 45231.2 3329.95   4
 -13   8   6 51041.1 3405.91   1
 -12   8   6 13379.8 1665.48   1
  12  -8  -6 9863.39 1435.54   4
  11  -8  -6 1036.29 557.003   4
 -11   8   6 949.622 576.384   1
  10  -8  -6 37110.7 2600.14   4
 -10   8   6 45235.4 2785.04   1
   9  -8  -6 70930.5 3477.12   4
  -9   8   6 75441.3 3539.37   1
  -8   8   6 80376.1 3524.91   1
   8  -8  -6 73291.3 3352.36   4
   7  -8  -6 37295.4 2175.96   4
  -7   8   6 39523.3 2310.29   1
  -7  -8   6 42869.5 1657.38   2
   6  -8  -6 2254.29 518.928   4
  -6  -8   6 2064.54 284.774   2
   6   8  -6 2719.87 479.885   1
  -6   8   6 2654.14 630.579   1
  -5  -8   6 253.205 77.2444   2
   5  -8  -6 454.743 266.459   4
   5   8  -6-101.292 213.401   1
   5  -8  -6 430.833 335.150   2
  -5   8   6 703.292 341.658   1
   4   8  -6 24528.9 1207.30   1
   4  -8  -6 23451.7 1270.42   4
  -4   8   6 26398.7 1688.47   1
   4  -8  -6 28445.1 1712.02   2
   3   8  -6 58099.9 1736.16   1
   3  -8  -6 59705.7 2564.77   2
   2  -8  -6 112343. 3609.11   2
   2   8  -6 89430.9 1961.76   1
   1  -8  -6 82570.9 3140.28   2
   0  -8  -6 17983.1 1332.07   2
  -1  -8  -6 1411.84 412.765   2
  -1   8  -6 1877.14 191.748   2
  -2  -8  -6 65413.8 2815.41   2
  -3  -8  -6 94219.5 3584.36   2
  -4  -8  -6 50990.1 2588.25   2
  -5  -8  -6 21382.7 1646.16   2
   5   8   6 18469.5 671.425   4
   6   8   6 3774.81 361.959   4
  -6  -8  -6 3132.72 697.954   2
  -7  -8  -6 3307.02 700.112   2
  -8  -8  -6 50441.1 2945.74   2
  -9  -8  -6 60556.6 3375.03   2
 -10  -8  -6 50438.2 3178.77   2
 -11  -8  -6 11030.3 1560.44   2
 -12  -8  -6 317.772 497.790   2
  15  -9  -6 3560.56 1014.58   4
 -15   9   6 4803.07 1225.64   1
  14  -9  -6-207.135 529.805   4
 -14   9   6 186.160 473.678   1
  13  -9  -6 3577.73 908.775   4
 -13   9   6 6458.19 1229.74   1
  12  -9  -6 13427.9 1666.26   4
 -12   9   6 16925.3 1896.16   1
  11  -9  -6 33341.8 2552.44   4
 -11   9   6 35901.3 2616.56   1
  10  -9  -6 34989.3 2529.81   4
 -10  -9   6 36965.2 2083.02   2
 -10   9   6 37620.1 2567.77   1
   9  -9  -6 8193.35 1129.00   4
  -9  -9   6 9241.55 918.538   2
  -9   9   6 6221.38 987.431   1
   8  -9  -6 196.604 337.225   4
  -8  -9   6 553.364 214.503   2
  -8   9   6-319.720 456.154   1
  -7   9   6 4746.93 825.690   1
   7  -9  -6 7411.07 929.398   4
  -7  -9   6 6855.60 603.262   2
   6   9  -6 16192.7 1233.50   1
  -6  -9   6 20043.5 860.121   2
   6  -9  -6 18273.1 1354.99   4
  -6   9   6 20417.6 1600.78   1
   5   9  -6 47708.7 2004.46   1
  -5   9   6 48914.1 2505.17   1
   5  -9  -6 49243.4 2118.65   4
   5  -9  -6 49142.4 2441.44   2
  -5  -9   6 45613.2 1177.30   2
   4   9  -6 21820.7 1170.17   1
   4  -9  -6 22240.9 1594.11   2
  -4   9   6 22515.6 1605.11   1
   3   9  -6 9379.36 638.637   1
   3  -9  -6 10962.5 1070.93   2
   2   9  -6 269.108 100.003   1
   2  -9  -6 85.2578 307.030   2
   1  -9  -6 3285.87 593.604   2
   0  -9  -6 47535.4 2331.27   2
  -1   9  -6 45530.1 1251.17   2
  -1  -9  -6 55039.2 2518.46   2
  -2  -9  -6 30748.8 1882.11   2
  -2   9  -6 25732.3 1038.91   2
  -3  -9  -6 405.617 357.520   2
  -4  -9  -6 2979.08 637.327   2
  -5  -9  -6 22724.8 1745.38   2
   5   9   6 20591.9 752.770   4
  -6  -9  -6 43609.9 2571.33   2
  -7  -9  -6 11318.0 1305.36   2
  -8  -9  -6 1716.66 569.524   2
  -9  -9  -6 320.288 335.029   2
 -10  -9  -6 1884.76 709.708   2
 -11  -9  -6 15603.5 1828.88   2
 -12  -9  -6 23009.1 2297.83   2
  15 -10  -6 1207.39 591.091   4
  14 -10  -6-420.848 638.107   4
 -14  10   6-165.095 403.765   1
  13 -10  -6 476.632 430.439   4
 -13 -10   6 325.300 288.529   2
 -13  10   6 433.279 479.855   1
  12 -10  -6 39.3842 413.492   4
 -12 -10   6-53.9776 429.160   2
 -12  10   6-254.505 551.106   1
 -11  10   6 906.246 528.952   1
  11 -10  -6 1022.76 503.662   4
 -11 -10   6 1446.90 475.711   2
 -10  10   6 9941.95 1337.38   1
  10 -10  -6 9844.33 1282.86   4
 -10 -10   6 9435.97 985.365   2
  -9 -10   6 10014.1 942.680   2
   9 -10  -6 7921.67 1109.85   4
  -9  10   6 8269.71 1179.74   1
   8 -10  -6 2801.93 623.032   4
  -8 -10   6 2994.26 455.285   2
  -8  10   6 3471.99 742.039   1
  -7 -10   6 316.007 131.179   2
  -7  10   6 177.173 313.323   1
  -6  10   6 34.4898 329.016   1
  -6 -10   6 49.1481 109.555   2
   6  10  -6 259.681 203.652   1
   6 -10  -6-68.8140 297.777   4
   5  10  -6-81.9985 193.191   1
   5 -10  -6 374.458 279.646   2
  -5 -10   6 99.6503 65.5764   2
  -5  10   6-159.969 316.512   1
  -4  10   6 14939.8 1362.51   1
   4  10  -6 17299.2 1063.83   1
   3 -10  -6 11652.6 1199.18   2
   3  10  -6 10304.1 714.200   1
   2  10  -6 4462.03 377.334   1
   2 -10  -6 3719.14 651.226   2
   1 -10  -6 3938.71 659.178   2
   0 -10  -6-33.2309 299.429   2
  -1 -10  -6 5970.25 871.905   2
  -1  10  -6 4670.03 326.913   2
  -2  10  -6 9791.18 603.954   2
  -2 -10  -6 9416.95 1064.70   2
  -3 -10  -6 477.793 392.349   2
  -3  10  -6 64.9164 177.707   2
  -4 -10  -6 1272.95 489.865   2
  -5 -10  -6-6.86430 332.347   2
  -6 -10  -6-224.373 365.716   2
  -7 -10  -6 163.507 313.577   2
  -8 -10  -6 486.775 285.589   2
  -9 -10  -6-12.1782 501.347   2
 -10 -10  -6 8858.73 1373.84   2
 -11 -10  -6 9591.55 1443.17   2
  15 -11  -6 2072.44 765.475   4
  14 -11  -6-524.869 560.023   4
 -14  11   6-421.469 512.033   1
  13 -11  -6 2662.94 927.794   4
 -13  11   6 3150.06 951.333   1
 -12  11   6 16054.7 1880.10   1
  12 -11  -6 13689.7 1720.76   4
 -11  11   6 1481.90 619.775   1
  11 -11  -6 2368.27 637.985   4
 -10  11   6 348.691 469.152   1
  10 -11  -6 40.0272 458.464   4
 -10 -11   6 880.457 253.365   2
  -9 -11   6 4646.21 644.545   2
  -9  11   6 4564.22 880.235   1
   9 -11  -6 4448.82 831.002   4
  -8  11   6 3372.35 671.870   1
  -8 -11   6 5312.83 579.764   2
   8 -11  -6 4482.43 791.404   4
  -7 -11   6 1533.24 288.338   2
   7 -11  -6 954.039 351.995   4
  -7  11   6 1837.50 618.837   1
  -6 -11   6 634.304 165.082   2
  -6  11   6 402.207 342.268   1
  -5  11   6-25.8188 275.349   1
   5  11  -6 545.560 270.403   1
   5 -11  -6 208.294 308.820   2
  -5 -11   6 135.885 74.3184   2
   4  11  -6 200.393 226.212   1
  -4  11   6 501.750 371.705   1
   4 -11  -6 538.961 400.903   2
   3  11  -6 146.738 188.995   1
   3 -11  -6 54.9581 309.911   2
   2  11  -6 2849.62 341.509   1
   2 -11  -6 1828.09 480.120   2
   1  11  -6 4293.33 299.300   1
   1  11  -6 4361.18 345.956   1
   1 -11  -6 4674.58 784.358   2
   0 -11  -6 2304.00 555.966   2
  -1  11  -6 2381.82 259.833   2
  -1 -11  -6 1388.32 455.985   2
  -2 -11  -6 1825.24 511.617   2
  -3 -11  -6 2856.30 590.924   2
  -4 -11  -6 490.407 405.227   2
  -5 -11  -6-308.449 432.300   2
  -6 -11  -6 87.3294 386.740   2
  -7 -11  -6 489.604 399.011   2
  -8 -11  -6-433.280 520.119   2
  -9 -11  -6 822.821 372.467   2
 -10 -11  -6 3317.39 865.339   2
 -11 -11  -6 167.455 422.955   2
  14 -12  -6 5443.11 1193.16   4
  13 -12  -6 11644.5 1685.40   4
 -13  12   6 12265.4 1780.95   1
 -12  12   6 3534.57 940.720   1
  12 -12  -6 2399.60 839.672   4
  11 -12  -6 294.509 447.843   4
 -11  12   6-19.0731 454.400   1
  10 -12  -6 3103.62 782.074   4
 -10  12   6 3263.57 843.888   1
   9 -12  -6 7019.85 1045.19   4
  -9  12   6 6030.95 1021.18   1
  -8  12   6 26158.7 2110.88   1
   8 -12  -6 25153.5 1908.54   4
  -7  12   6 28279.6 2119.56   1
  -6  12   6 14481.1 1481.33   1
  -5  12   6 5449.38 897.077   1
   5 -12  -6 5231.33 873.813   2
  -4  12   6 1976.09 536.835   1
   4 -12  -6 2032.50 532.039   2
   3 -12  -6 15270.3 1416.63   2
   2 -12  -6 25488.0 1832.03   2
   1  12  -6 24067.8 913.323   1
   1 -12  -6 25300.9 1834.11   2
   0  12  -6 101.721 72.6371   1
   0 -12  -6 747.440 364.317   2
  -1 -12  -6 14580.5 1379.94   2
  -2 -12  -6 28546.0 1997.81   2
  -3 -12  -6 31638.3 2139.07   2
  -4 -12  -6 30129.5 2136.05   2
  -5 -12  -6 5308.06 909.192   2
  -6 -12  -6 653.622 420.304   2
  -7 -12  -6 4270.04 896.285   2
  -8 -12  -6 16141.6 1799.09   2
  -9 -12  -6 18235.1 1934.03   2
 -10 -12  -6 9926.61 1462.02   2
  14 -13  -6-389.790 414.595   4
  13 -13  -6 16682.5 2056.12   4
 -13  13   6 18894.0 2209.61   1
  12 -13  -6 30358.4 2613.94   4
 -12  13   6 33317.7 2789.68   1
  11 -13  -6 29966.0 2473.35   4
 -11  13   6 31799.2 2619.17   1
  10 -13  -6 18025.4 1813.12   4
 -10  13   6 18463.4 1930.98   1
  -9  13   6 5531.95 1093.84   1
  -8  13   6-42.5978 413.089   1
  -7  13   6 11999.6 1423.61   1
  -6  13   6 46398.9 2777.36   1
  -5  13   6 71278.3 3479.56   1
   5 -13  -6 77750.1 3572.53   2
  -4  13   6 44062.0 2598.84   1
   4 -13  -6 41342.5 2518.95   2
   3 -13  -6 9386.65 1127.43   2
   2 -13  -6 10657.7 1207.41   2
   1  13  -6 39608.0 1344.97   1
   1 -13  -6 35895.0 2275.65   2
   0 -13  -6 53099.5 2824.80   2
  -1 -13  -6 45827.7 2607.96   2
  -2 -13  -6 27204.1 2009.34   2
  -3 -13  -6 1862.69 498.809   2
  -4 -13  -6 2119.75 594.756   2
  -5 -13  -6 16840.1 1656.61   2
  -6 -13  -6 34154.8 2476.98   2
  -7 -13  -6 31260.2 2434.07   2
  -8 -13  -6 18653.7 1921.21   2
  -9 -13  -6-352.761 492.784   2
 -10 -13  -6 3832.71 959.776   2
  13 -14  -6 37808.3 3105.12   4
 -12  14   6 12952.9 1757.57   1
  12 -14  -6 12104.3 1653.10   4
 -11  14   6 2288.27 727.706   1
 -10  14   6 24958.3 2297.71   1
  -9  14   6 60402.9 3550.00   1
  -8  14   6 53866.8 3234.91   1
  -7  14   6 37724.0 2611.06   1
  -6  14   6 10323.5 1349.10   1
  -5  14   6 303.827 389.184   1
   5 -14  -6 79.2341 330.048   2
  -4  14   6 27272.9 2061.57   1
   4 -14  -6 27485.4 2092.88   2
   3 -14  -6 40678.5 2537.07   2
   2 -14  -6 64834.0 3230.00   2
   1 -14  -6 53141.3 2897.19   2
   0 -14  -6 8437.31 1104.95   2
  -1 -14  -6 2272.26 602.306   2
  -2 -14  -6 47465.7 2771.85   2
  -3 -14  -6 129409. 4968.89   2
  -4 -14  -6 95965.8 4260.05   2
  -5 -14  -6 48362.3 2998.88   2
  -6 -14  -6 5965.31 991.622   2
  -7 -14  -6 3017.00 800.065   2
  -8 -14  -6 42163.1 3010.00   2
  -9 -14  -6 38954.8 2949.83   2
 -11  15   6 29028.3 2593.65   1
 -10  15   6 36323.7 2853.54   1
  -9  15   6 1334.32 619.582   1
  -8  15   6 5660.02 1043.09   1
  -7  15   6 23009.0 2095.47   1
  -6  15   6 47340.6 2990.16   1
  -5  15   6 81888.9 3936.67   1
   4 -15  -6 36306.0 2464.16   2
  -4  15   6 35003.2 2461.57   1
   3 -15  -6 622.426 431.877   2
   2 -15  -6 4628.59 781.971   2
   1 -15  -6 53940.3 2986.97   2
   0 -15  -6 117100. 4738.85   2
  -1 -15  -6 87925.6 3979.59   2
  -2 -15  -6 41760.0 2639.09   2
  -3 -15  -6 2707.49 685.158   2
  -4 -15  -6 4905.23 945.039   2
  -5 -15  -6 33660.8 2520.49   2
  -6 -15  -6 60270.4 3500.95   2
  -7 -15  -6 63058.6 3678.46   2
  -8 -15  -6 23822.5 2283.97   2
 -10  16   6 9275.31 1470.94   1
  -9  16   6 31969.9 2657.89   1
  -8  16   6 22401.3 2151.88   1
  -7  16   6 9588.70 1402.95   1
  -6  16   6 2404.70 780.331   1
  -5  16   6 1961.08 637.192   1
   4 -16  -6 23532.0 2036.08   2
  -4  16   6 24287.2 2098.71   1
   3 -16  -6 32593.2 2375.23   2
   2 -16  -6 27854.9 2161.68   2
   1 -16  -6 16515.4 1635.01   2
   0 -16  -6 3525.66 806.715   2
  -1 -16  -6 917.832 407.045   2
  -2 -16  -6 25815.3 2121.61   2
  -3 -16  -6 35962.4 2561.42   2
  -4 -16  -6 26716.0 2229.15   2
  -5 -16  -6 13973.0 1657.86   2
  -6 -16  -6 735.562 431.519   2
  -7 -16  -6 5362.34 1096.69   2
  -9  17   6 1154.21 554.996   1
  -8  17   6-204.625 552.226   1
  -7  17   6 571.346 361.817   1
  -6  17   6 261.669 409.413   1
  -5  17   6-163.347 506.648   1
  -4  17   6 624.802 530.037   1
   4 -17  -6 624.514 440.733   2
  -3  17   6 975.739 467.244   1
   3 -17  -6 318.751 406.189   2
   2 -17  -6 2881.55 727.494   2
   1 -17  -6 1794.89 617.082   2
   0 -17  -6 3708.98 817.691   2
  -1 -17  -6 11477.4 1441.53   2
  -2 -17  -6 2195.50 677.419   2
  -3 -17  -6-286.249 381.151   2
  -4 -17  -6 286.351 344.190   2
  -5 -17  -6 527.120 443.482   2
  -6 -17  -6 2787.48 799.894   2
  -8  18   6 908.265 538.623   1
  -7  18   6 2585.06 683.191   1
  -6  18   6 4231.94 993.692   1
  -5  18   6 89.0456 456.924   1
   4 -18  -6 1356.58 628.192   2
  -4  18   6-487.438 485.256   1
  -3  18   6 2728.26 737.063   1
   3 -18  -6 1196.97 600.057   2
   2 -18  -6 4216.28 925.271   2
   1 -18  -6 545.504 305.293   2
   0 -18  -6-793.401 531.052   2
  -1 -18  -6 834.283 578.314   2
  -2 -18  -6 851.999 562.625   2
  -3 -18  -6-349.199 452.979   2
  -4 -18  -6-117.860 456.209   2
  -5 -18  -6 816.510 428.242   2
  -6  19   6 7441.05 1311.18   1
  -5  19   6 14062.7 1744.72   1
   4 -19  -6 11986.8 1603.95   2
  -4  19   6 9562.44 1433.29   1
   3 -19  -6 216.791 410.119   2
  -3  19   6 758.429 558.052   1
   2 -19  -6 2641.16 785.396   2
   1 -19  -6 8127.09 1286.84   2
   0 -19  -6 14677.6 1721.19   2
  -1 -19  -6 16923.8 1863.77   2
  -2 -19  -6 17194.6 1872.33   2
  -3 -19  -6 1160.19 528.181   2
   3 -20  -6 36444.5 2853.24   2
   2 -20  -6 30791.7 2591.68   2
   1 -20  -6 15906.1 1806.63   2
   0 -20  -6 3104.36 915.477   2
 -17   0   7 1404.56 749.872   1
 -16   0   7-265.155 728.699   1
 -15   0   7-300.852 734.609   1
 -14   0   7-163.635 618.970   1
 -14   0   7-600.807 494.910   3
 -13   0   7 757.042 571.422   1
 -13   0   7-29.3813 328.600   3
 -12   0   7-1023.28 805.022   1
 -12   0   7 100.474 454.948   3
 -11   0   7-689.057 613.734   1
 -10   0   7-163.521 450.302   1
  -9   0   7 380.163 496.833   1
  -8   0   7-230.745 341.016   1
  -7   0   7-95.4714 268.944   1
  -6   0   7 39.4257 230.004   1
  -6   0   7-3.76598 126.031   2
  -5   0   7-393.038 257.139   1
  -5   0   7-9.07331 138.331   2
  -4   0   7 186.123 130.700   2
  -4   0   7-49.2338 154.137   1
  -3   0   7-38.4712 115.829   2
   3   0  -7 201.732 170.190   2
  -3   0   7 163.829 197.738   1
  -2   0   7 61.2256 132.999   1
  -2   0   7-66.1834 116.576   2
   2   0  -7 199.208 152.285   2
  -1   0   7-57.4165 150.214   2
  -1   0   7-61.6575 117.702   1
   1   0  -7 24.7729 146.882   2
   0   0  -7-48.2659 191.556   2
   0   0   7 59.1325 142.556   2
  -1   0  -7 83.8101 196.031   2
  -2   0  -7-213.514 219.459   2
  -2   0  -7 304.452 133.047   4
  -3   0  -7 784.806 237.999   4
  -3   0  -7-4.10000 230.495   2
  -4   0  -7-5.71247 228.395   4
  -4   0  -7 287.076 215.191   2
   4   0   7 121.223 303.716   3
  -5   0  -7-43.2901 271.172   2
   5   0   7 311.173 397.339   3
  -6   0  -7 160.187 328.119   2
   6   0   7-338.169 493.433   3
  -7   0  -7-7.43012 279.528   2
   7   0   7-356.168 364.598   3
  -8   0  -7 386.446 342.464   2
   8   0   7-293.731 338.641   3
  -9   0  -7-230.654 350.700   2
 -10   0  -7-1553.71 591.282   2
 -11   0  -7-453.998 498.751   2
 -12   0  -7-70.7065 412.835   2
 -13   0  -7-518.259 512.491   2
 -17  -1   7 10419.1 1812.08   1
 -17   1   7 12333.4 1898.98   1
 -16   1   7 6939.44 1422.77   1
 -16  -1   7 6208.47 1343.92   1
 -15   1   7 1931.88 876.926   1
 -15  -1   7 2563.12 955.321   1
 -14  -1   7 191.093 531.427   1
 -14   1   7-42.4051 429.080   1
 -14   1   7-204.318 470.236   3
 -14  -1   7-432.677 526.806   3
 -13  -1   7 152.715 468.878   1
 -13   1   7 1327.16 654.301   1
 -13   1   7 1245.72 543.428   3
 -13  -1   7-89.3255 546.049   3
 -12  -1   7 18441.8 1750.27   3
 -12  -1   7 18219.2 1928.87   1
 -12   1   7 20361.9 2008.57   1
 -11   1   7 19662.4 1870.24   1
 -11  -1   7 20722.8 1864.45   3
 -11  -1   7 18516.1 1852.41   1
 -10  -1   7 7058.56 1132.35   1
 -10   1   7 8991.82 1212.21   1
 -10  -1   7 7848.21 1170.88   3
  -9  -1   7 2394.37 800.698   3
  -9   1   7 1428.48 620.336   1
  -9  -1   7 281.037 442.191   1
  -8  -1   7 674.337 427.726   1
  -8   1   7 862.185 416.705   1
  -7  -1   7 10705.5 1111.62   1
  -7  -1   7 9080.31 782.628   2
  -7   1   7 8148.01 957.985   1
  -6  -1   7 19513.3 1384.02   1
   6   1  -7 16882.2 1130.69   1
  -6   1   7 19212.1 1356.45   1
  -6  -1   7 15756.1 977.278   2
  -6   1   7 17456.3 1133.01   2
  -5   1   7 5744.88 692.922   1
   5   1  -7 6587.08 643.173   1
  -5  -1   7 6643.41 752.567   1
  -5  -1   7 5876.24 553.510   2
  -5   1   7 5732.89 592.274   2
  -4   1   7 13982.3 1000.72   1
  -4  -1   7 14024.9 986.824   1
  -4   1   7 14512.3 935.731   2
  -4  -1   7 14305.8 822.036   2
  -3   1   7 2717.49 411.761   2
  -3  -1   7 2920.02 363.205   2
  -3  -1   7 3494.78 442.949   1
  -3   1   7 2886.56 427.793   1
   3  -1  -7 3053.72 414.689   2
  -2   1   7 4065.81 489.645   2
  -2  -1   7 3809.99 406.373   1
  -2  -1   7 3888.05 417.836   2
   2   1  -7 3072.13 363.617   2
   2  -1  -7 3628.99 445.391   2
  -2   1   7 2865.70 397.291   1
  -1   1   7 15296.5 982.644   2
  -1  -1   7 14699.5 862.891   2
   1   1  -7 15819.6 840.111   2
   1  -1  -7 14793.9 918.041   2
  -1  -1   7 14543.0 780.602   1
   0   1   7 10464.2 838.841   2
   0  -1  -7 11499.1 839.414   2
   0   1  -7 10151.8 706.830   2
  -1  -1  -7 13135.9 948.391   2
  -1   1  -7 12067.8 822.255   2
  -1  -1  -7 13989.1 685.604   4
   1  -1   7 14095.8 1465.50   3
  -2  -1  -7 174.874 234.360   2
  -2   1  -7 332.083 191.924   2
  -2  -1  -7 445.447 168.953   4
  -2   1  -7 108.095 118.219   4
   2  -1   7 9.94346 358.151   3
  -3  -1  -7 330.668 198.606   2
  -3   1  -7 523.037 196.734   4
  -3   1  -7-92.5630 221.829   2
   3  -1   7 410.427 388.204   3
  -4   1  -7 1008.69 317.101   2
  -4   1  -7 1631.12 350.012   4
  -4  -1  -7 1462.32 375.800   2
   4  -1   7 1258.46 443.607   3
   4  -1   7 1222.56 361.132   1
  -5   1  -7 64903.8 2522.88   4
  -5  -1  -7 66940.5 2816.01   2
  -5   1  -7 65559.2 2716.61   2
   5   1   7 73275.1 3227.97   3
   5  -1   7 68799.4 3034.86   3
   5  -1   7 70160.9 2842.12   1
  -6  -1  -7 130077. 4487.83   2
  -6   1  -7 131386. 4398.47   2
   6  -1   7 140463. 4538.90   3
   7   1   7 60402.6 2686.72   3
  -7  -1  -7 59236.5 2906.08   2
  -7   1  -7 58843.1 2819.06   2
   7  -1   7 60817.2 2637.18   3
  -8  -1  -7 2323.72 576.214   2
   8   1   7 3594.54 571.187   3
  -8   1  -7 2155.18 590.036   2
  -9  -1  -7 1241.53 547.494   2
  -9   1  -7 524.974 436.797   2
 -10  -1  -7 4102.52 892.856   2
 -10   1  -7 4344.24 860.815   2
 -11  -1  -7 10597.7 1508.96   2
 -11   1  -7 11225.1 1481.10   2
 -12  -1  -7 4063.01 943.286   2
 -12   1  -7 1615.71 602.910   2
 -13  -1  -7 5861.46 1154.22   2
 -13   1  -7 6333.68 1307.83   2
 -17  -2   7-765.492 766.079   1
 -16  -2   7 17450.2 2194.64   1
 -16   2   7 20393.6 2390.52   1
 -15  -2   7 34707.4 2975.95   1
 -15   2   7 34223.3 2998.41   1
 -14  -2   7 27962.2 2083.31   3
 -14  -2   7 27508.0 2551.29   1
 -14   2   7 28550.2 2618.80   1
 -13  -2   7 20856.6 1822.67   3
 -13  -2   7 20308.2 2120.35   1
 -13   2   7 24067.6 2282.17   1
 -12   2   7 18231.3 1911.70   1
 -12  -2   7 15640.5 1608.54   3
 -12  -2   7 18268.9 1923.55   1
 -11  -2   7 7854.78 1223.92   1
 -11   2   7 7961.67 1160.19   1
 -11  -2   7 8705.68 1175.47   3
 -10   2   7 16379.3 1637.35   1
 -10  -2   7 17269.2 1728.82   3
 -10  -2   7 18340.8 1733.36   1
  -9  -2   7 50852.6 3013.30   3
  -9  -2   7 49953.6 2851.31   1
  -9   2   7 47574.9 2737.26   1
  -8   2   7 96534.3 3837.77   1
  -8  -2   7 106822. 4512.64   3
  -8  -2   7 92604.3 3057.69   2
  -8  -2   7 101150. 3982.51   1
  -7  -2   7 83741.0 3386.71   1
  -7  -2   7 81851.7 3944.58   3
  -7   2   7 84292.2 3289.28   1
  -7  -2   7 77856.0 2570.93   2
   6   2  -7 11585.7 927.843   1
  -6  -2   7 14123.2 1208.01   1
  -6  -2   7 12426.2 1529.45   3
  -6  -2   7 13690.8 862.571   2
  -6   2   7 11934.6 1089.82   1
  -5   2   7 33397.8 1740.91   1
  -5  -2   7 36750.8 1831.60   1
  -5  -2   7 36296.9 2496.93   3
   5   2  -7 31124.0 1447.42   1
  -5  -2   7 33784.0 1322.92   2
  -5   2   7 34094.7 1596.70   2
  -4  -2   7 69708.8 2006.55   2
  -4  -2   7 72211.1 2510.14   1
  -4   2   7 68006.9 2507.12   1
  -4   2   7 68741.1 2405.03   2
  -3   2   7 54205.4 2080.23   2
  -3  -2   7 57167.6 1703.91   2
  -3  -2   7 55821.1 3142.79   3
  -3  -2   7 60353.4 2044.59   1
   3  -2  -7 57636.2 2114.56   2
  -3   2   7 55107.7 2129.03   1
  -2   2   7 55951.4 2098.97   2
  -2  -2   7 58702.8 1747.25   2
  -2  -2   7 49359.2 2989.92   3
   2   2  -7 56977.4 1667.80   2
  -2  -2   7 59686.4 1840.80   1
  -2   2   7 52638.5 2030.87   1
   2  -2  -7 58305.5 2111.43   2
  -1  -2   7 17601.5 799.020   1
  -1   2   7 16650.7 1085.99   2
  -1  -2   7 17286.4 1660.53   3
   1   2  -7 18956.5 858.359   2
   1  -2  -7 18587.1 1100.96   2
   0  -2   7 14559.7 676.412   1
   0  -2   7 15663.8 1583.33   3
   0   2   7 15742.7 1090.57   2
   0  -2  -7 16818.3 1061.69   2
   0   2  -7 14076.9 788.544   2
  -1  -2  -7 11256.3 912.759   2
  -1   2  -7 11709.3 768.542   2
  -1  -2  -7 11164.1 519.430   4
   1  -2   7 12543.3 1339.00   3
  -2  -2  -7 64385.3 2460.96   2
  -2   2  -7 64101.1 2219.49   4
   2  -2   7 65881.8 3161.69   3
  -2   2  -7 63158.0 2165.86   2
  -3  -2  -7 105807. 3496.88   2
  -3   2  -7 103422. 3199.10   4
  -3   2  -7 110868. 3300.84   2
   3  -2   7 110478. 4187.24   3
   3  -2   7 111966. 3229.92   1
  -4   2  -7 63424.8 2396.01   4
  -4  -2  -7 65225.5 2681.37   2
  -4   2  -7 61582.9 2444.04   2
   4  -2   7 66886.7 3046.23   3
   4  -2   7 65761.4 2518.33   1
   5  -2   7 2153.07 448.061   1
  -5  -2  -7 1907.39 460.458   2
   5  -2   7 3083.99 567.742   3
   6  -2   7 6038.35 826.342   1
  -6  -2  -7 4971.54 788.758   2
  -6   2  -7 4815.73 752.741   2
   6  -2   7 6285.18 779.547   3
  -7  -2  -7 36578.7 2300.76   2
   7   2   7 41037.5 2193.25   3
  -7   2  -7 37971.5 2202.43   2
  -8  -2  -7 33146.5 2265.14   2
   8   2   7 38465.5 2005.05   3
  -8   2  -7 34980.3 2214.03   2
  -9  -2  -7 44139.0 2792.84   2
  -9   2  -7 47595.4 2743.11   2
 -10  -2  -7 11623.6 1440.56   2
 -10   2  -7 9926.12 1329.33   2
 -11  -2  -7 3120.73 930.942   2
 -11   2  -7 2232.41 686.133   2
 -12  -2  -7 2775.36 798.086   2
 -12   2  -7 1685.81 835.617   2
 -13  -2  -7 9697.75 1516.61   2
 -13   2  -7 9772.28 1456.82   2
  16  -3  -7 29205.9 2887.76   4
 -16  -3   7 30156.9 2891.50   1
 -16   3   7 27469.6 2792.70   1
 -15   3   7 1143.90 736.657   1
 -15  -3   7 1290.28 493.815   1
 -14   3   7 5565.96 1208.27   1
 -14  -3   7 8610.77 1141.28   3
 -14  -3   7 6949.87 1257.73   1
 -13   3   7 15709.5 1845.72   1
 -13  -3   7 13807.6 1491.99   3
 -13  -3   7 15328.3 1814.33   1
 -12   3   7 74531.7 3942.50   1
 -12  -3   7 70115.2 3529.67   3
 -12  -3   7 74580.6 3981.37   1
 -11   3   7 64137.4 3480.94   1
 -11  -3   7 63917.6 3359.10   3
 -11  -3   7 63473.1 3535.30   1
 -10   3   7 36028.5 2420.39   1
 -10  -3   7 35298.1 2432.62   3
 -10  -3   7 34984.5 2456.08   1
  -9  -3   7 5620.33 979.120   1
  -9  -3   7 5805.98 1009.39   3
  -9   3   7 6429.17 966.563   1
  -8   3   7 1202.32 520.153   1
  -8  -3   7 1426.77 573.663   1
  -8  -3   7 1722.58 678.906   3
  -7  -3   7 34875.9 2453.69   3
  -7  -3   7 30797.7 1408.38   2
  -7   3   7 33137.0 1954.22   1
  -7  -3   7 33151.0 2069.58   1
   6   3  -7 144645. 4037.74   1
  -6  -3   7 143859. 3598.61   2
  -6  -3   7 149010. 4623.89   1
  -6   3   7 151700. 4560.04   1
   5   3  -7 59031.2 2100.48   1
  -5   3   7 63277.5 2542.52   1
  -5  -3   7 58326.9 3240.03   3
  -5  -3   7 63477.1 1859.28   2
  -5  -3   7 64901.3 2567.55   1
  -4  -3   7 20004.0 1205.91   1
  -4  -3   7 16873.3 771.058   2
  -4  -3   7 18242.1 1760.18   3
  -4   3   7 16953.9 1188.64   1
   4  -3  -7 20780.2 1242.34   2
  -3  -3   7 12425.1 841.133   1
  -3   3   7 11164.5 919.581   1
  -3  -3   7 13034.1 621.083   2
  -3  -3   7 12215.0 1407.30   3
   3  -3  -7 13186.1 962.301   2
  -2   3   7 43321.0 1880.63   2
  -2  -3   7 44579.9 1502.43   1
  -2   3   7 39806.8 1785.84   1
  -2  -3   7 40962.6 2618.31   3
  -2  -3   7 44410.9 1349.28   2
   2  -3  -7 41036.2 1814.26   2
  -1  -3   7 122268. 4841.96   3
  -1  -3   7 127774. 2954.41   1
   1   3  -7 135111. 2979.03   2
   1  -3  -7 129354. 3724.38   2
   0  -3   7 71636.0 1715.01   1
   0  -3   7 72033.1 3452.43   3
   0  -3  -7 70166.0 2543.41   2
   0   3  -7 71844.5 1980.61   2
  -1  -3  -7 68411.2 2588.40   2
  -1   3  -7 69905.5 2128.12   2
   1  -3   7 77076.5 3483.68   3
   1  -3   7 76515.6 1949.46   1
  -2  -3  -7 64440.9 2563.50   2
  -2   3  -7 64701.2 2161.29   2
  -2   3  -7 65597.3 2387.13   4
   2  -3   7 71749.0 3287.38   3
   2  -3   7 67923.5 2032.87   1
   3  -3   7 1477.86 292.808   1
  -3  -3  -7 1224.04 388.134   2
  -3   3  -7 807.911 265.183   4
  -3   3  -7 988.816 282.239   2
   3  -3   7 656.856 396.143   3
  -4  -3  -7 43536.3 2173.33   2
  -4   3  -7 44396.5 1979.20   2
   4  -3   7 46730.1 2467.02   3
   4  -3   7 45756.5 1964.53   1
   5  -3   7 106209. 3572.42   1
  -5  -3  -7 107994. 3853.91   2
  -5   3  -7 102004. 3488.75   2
   5  -3   7 110663. 3980.85   3
   6  -3   7 101890. 3664.89   1
  -6  -3  -7 103018. 3866.57   2
  -6   3  -7 92417.6 3559.05   2
  -7  -3  -7 85873.3 3636.14   2
  -7   3  -7 83089.9 3407.84   2
  -8  -3  -7 12774.6 1368.43   2
   8   3   7 14941.7 1261.21   3
  -9  -3  -7 2391.86 745.327   2
 -10  -3  -7 15675.9 1693.56   2
 -11  -3  -7 36675.8 2700.34   2
 -12  -3  -7 19607.0 2050.11   2
 -13  -3  -7 18598.7 2061.73   2
  16  -4  -7 19678.0 2390.97   4
 -16   4   7 18165.9 2276.86   1
  15  -4  -7 42880.1 3396.38   4
 -15   4   7 40103.1 3241.68   1
 -14   4   7 39114.2 3061.66   1
  14  -4  -7 35742.7 3020.73   4
 -14  -4   7 36770.6 2954.59   1
 -13   4   7 21499.4 2161.94   1
 -13  -4   7 22025.1 1855.03   3
 -13  -4   7 23243.2 2271.22   1
 -12   4   7 10028.0 1449.37   1
 -12  -4   7 7948.01 1093.13   3
 -12  -4   7 8701.08 1333.11   1
 -11  -4   7 9523.68 1253.66   3
 -11   4   7 9404.42 1322.31   1
 -11  -4   7 8449.76 1280.00   1
 -10   4   7 75426.6 3625.81   1
 -10  -4   7 72173.3 3603.87   3
 -10  -4   7 70000.3 3583.09   1
  -9  -4   7 76910.8 3756.06   3
  -9   4   7 82398.3 3604.76   1
  -9  -4   7 72609.9 3546.07   1
  -8  -4   7 62866.0 3357.60   3
  -8   4   7 62077.9 2949.21   1
  -8  -4   7 60072.8 2983.76   1
  -7  -4   7 69795.8 3564.97   3
  -7  -4   7 66245.7 2181.48   2
  -7  -4   7 69266.4 3037.73   1
  -7   4   7 69266.6 2989.38   1
  -6  -4   7 4771.30 724.579   1
   6   4  -7 4129.48 540.631   1
  -6  -4   7 3872.85 869.356   3
  -6  -4   7 3959.79 406.914   2
  -6   4   7 4870.41 710.599   1
  -5   4   7 29895.6 1697.55   1
  -5  -4   7 26815.8 2135.28   3
   5   4  -7 27909.5 1320.82   1
  -5  -4   7 27512.8 1600.91   1
  -5  -4   7 30776.7 1066.63   2
  -4  -4   7 80185.0 1900.75   2
  -4  -4   7 71783.7 3639.30   3
   4  -4  -7 79785.4 2838.22   2
   4   4  -7 79284.0 2242.50   1
  -4  -4   7 72887.9 2580.82   1
  -4   4   7 80718.8 2930.80   1
  -3  -4   7 121047. 2583.34   2
  -3  -4   7 121216. 4833.11   3
  -3   4   7 132188. 3815.12   1
   3  -4  -7 131635. 3765.04   2
  -3  -4   7 116488. 3176.62   1
  -2  -4   7 126368. 4895.74   3
  -2  -4   7 121982. 2909.48   1
   1  -4  -7 19495.2 653.247   4
  -1  -4   7 18498.9 1669.62   3
   1   4  -7 17870.9 640.648   2
   1  -4  -7 20821.8 1288.13   2
   0  -4  -7 2113.55 426.771   2
   0   4  -7 2394.77 251.894   2
   0  -4   7 1590.07 492.605   3
  -1  -4  -7 32214.6 1689.97   2
  -1   4  -7 32701.1 1211.96   2
   1  -4   7 33351.2 2200.34   3
  -2  -4  -7 106933. 3476.24   2
  -2   4  -7 107251. 2829.20   2
   2  -4   7 111068. 4179.83   3
  -3  -4  -7 125456. 4027.55   2
  -3   4  -7 129066. 3510.38   2
   3  -4   7 134537. 4628.83   3
  -4  -4  -7 104305. 3700.36   2
   4  -4   7 97095.5 2992.80   1
  -4   4  -7 108652. 3323.26   2
  -5  -4  -7 41993.0 2267.75   2
   5  -4   7 37997.0 1847.50   1
  -5   4  -7 41113.6 2003.25   2
  -6  -4  -7 333.477 308.577   2
  -7  -4  -7 58356.3 2966.89   2
  -8  -4  -7 72881.0 3513.47   2
  -9  -4  -7 49360.1 2944.57   2
 -10  -4  -7 22229.9 2013.96   2
 -11  -4  -7 9161.86 1342.88   2
 -12  -4  -7-351.189 591.138   2
 -16   5   7 9978.41 1712.28   1
  16  -5  -7 7856.80 1588.91   4
 -15   5   7-457.066 575.631   1
  15  -5  -7 541.706 544.622   4
  14  -5  -7 13655.5 1903.08   4
 -14   5   7 13708.0 1821.50   1
 -13   5   7 30807.5 2613.17   1
  13  -5  -7 31820.5 2727.83   4
  12  -5  -7 58597.9 3616.36   4
 -12   5   7 54269.3 3337.06   1
  11  -5  -7 64120.9 3655.78   4
 -11   5   7 61704.1 3431.19   1
 -11  -5   7 58566.1 3224.33   3
 -11  -5   7 57867.3 3376.30   1
 -10  -5   7 23982.4 2013.94   3
 -10  -5   7 23491.9 2010.74   1
  -9   5   7 8236.43 1090.58   1
  -9  -5   7 6606.71 1011.05   3
  -9  -5   7 7642.29 1036.74   1
  -8  -5   7 9487.59 1244.15   3
  -8  -5   7 9089.04 1108.90   1
  -8   5   7 10603.1 1193.92   1
  -7  -5   7 62763.9 3359.02   3
  -7  -5   7 63288.2 2030.31   2
  -7  -5   7 59180.7 2769.52   1
  -7   5   7 64729.1 2910.78   1
   6   5  -7 130719. 3777.57   1
  -6   5   7 138302. 4435.47   1
  -6  -5   7 125371. 5066.12   3
  -6  -5   7 140964. 3235.33   2
  -6  -5   7 124310. 4131.59   1
   5   5  -7 143285. 3747.19   1
  -5  -5   7 127094. 5195.47   3
  -5   5   7 143586. 4487.94   1
  -5  -5   7 136669. 4115.27   1
  -5  -5   7 156292. 3191.98   2
  -4   5   7 24203.5 1522.42   1
   4   5  -7 24285.5 1037.34   1
   4  -5  -7 26474.5 1404.31   4
  -4  -5   7 24688.7 2037.51   3
   4  -5  -7 24264.7 1492.55   2
  -3   5   7-114.100 262.626   1
   3  -5  -7-125.460 150.777   4
  -3  -5   7-224.110 491.050   3
   3  -5  -7 389.826 293.712   2
   2  -5  -7 8575.96 515.105   4
   2  -5  -7 10285.4 942.594   2
  -1  -5   7 15834.9 1563.78   3
   1  -5  -7 14433.1 1118.24   2
   0  -5   7 48430.7 2767.21   3
   0   5  -7 50156.1 1295.62   2
   0  -5  -7 50242.1 2214.32   2
  -1  -5  -7 69127.4 2759.97   2
  -1   5  -7 74751.5 1986.37   2
   1  -5   7 78059.8 3494.48   3
  -2  -5  -7 52726.0 2357.65   2
  -2   5  -7 50722.7 1732.48   2
   2  -5   7 49762.3 2714.04   3
  -3  -5  -7 9488.22 1000.32   2
   3  -5   7 8685.43 445.435   1
  -3   5  -7 8915.67 762.489   2
  -4  -5  -7 6136.20 852.703   2
  -4   5  -7 6280.53 695.802   2
   4  -5   7 5849.69 505.943   1
  -5  -5  -7 62925.2 2867.58   2
   5  -5   7 56085.6 2114.70   1
  -6  -5  -7 131702. 4687.76   2
  -7  -5  -7 60973.4 3097.34   2
  -8  -5  -7 7335.55 1063.17   2
  -9  -5  -7 128.999 411.852   2
 -10  -5  -7 14011.8 1584.82   2
 -11  -5  -7 22010.8 2124.29   2
 -12  -5  -7 22605.5 2201.48   2
 -16   6   7 5107.82 1237.86   1
  16  -6  -7 5869.10 1283.80   4
  15  -6  -7 16062.4 2137.32   4
 -15   6   7 14799.3 1970.19   1
 -14   6   7 26254.5 2520.64   1
  14  -6  -7 22424.3 2417.58   4
 -13   6   7 12667.9 1680.85   1
  13  -6  -7 11653.9 1698.64   4
  12  -6  -7 325.526 425.287   4
 -12   6   7 1952.50 738.202   1
  11  -6  -7 1113.38 530.265   4
 -11   6   7 673.594 439.978   1
 -10   6   7 10540.4 1320.13   1
  10  -6  -7 10064.1 1352.90   4
   9  -6  -7 22514.0 1945.13   4
  -9   6   7 24041.0 1895.78   1
   8  -6  -7 23018.5 1851.44   4
  -8  -6   7 24378.1 2023.93   3
  -8   6   7 27540.7 1955.75   1
  -7   6   7 13701.1 1321.18   1
   7  -6  -7 12592.5 1262.74   4
  -7  -6   7 15091.4 1569.62   3
  -6   6   7 365.605 260.740   1
   6  -6  -7 1043.16 450.353   4
   6   6  -7 371.660 219.819   1
  -6  -6   7-21.4885 446.260   3
  -6  -6   7 450.098 142.040   2
  -5   6   7 1980.33 518.144   1
   5  -6  -7 1761.74 429.275   4
  -5  -6   7 1811.44 180.539   2
  -5  -6   7 2471.00 719.184   3
   5   6  -7 2620.07 366.329   1
  -5  -6   7 2505.36 196.848   2
   4  -6  -7 31124.6 1494.56   4
  -4   6   7 30293.4 1781.16   1
  -4  -6   7 29564.7 2256.57   3
   4   6  -7 30900.5 1181.93   1
   4  -6  -7 31043.1 1762.98   2
  -3   6   7 75179.6 2927.34   1
   3  -6  -7 78033.4 2248.12   4
  -3  -6   7 73068.2 3598.58   3
   3  -6  -7 76424.8 2915.88   2
   2  -6  -7 20842.1 786.844   4
  -2  -6   7 19269.5 1740.51   3
   2  -6  -7 23274.4 1463.32   2
  -1  -6   7 22905.6 1893.01   3
   1  -6  -7 21359.6 1413.70   2
   0  -6  -7 1051.26 349.654   2
  -1   6  -7 13114.7 613.399   2
  -1  -6  -7 11837.3 1068.45   2
  -2  -6  -7 47295.0 2285.71   2
  -2   6  -7 46262.6 1581.43   2
  -3  -6  -7 69489.2 2967.74   2
  -3   6  -7 69613.8 2294.77   2
  -4  -6  -7 58002.7 2728.38   2
   4  -6   7 52879.8 1526.75   1
  -5  -6  -7 20643.6 1593.25   2
  -6  -6  -7 1789.01 552.333   2
  -7  -6  -7 203.124 353.454   2
  -8  -6  -7 9083.94 1213.81   2
  -9  -6  -7 8621.81 1228.86   2
 -10  -6  -7 8357.69 1288.94   2
 -11  -6  -7 1032.75 537.128   2
 -12  -6  -7 48.7346 379.750   2
  16  -7  -7 768.740 627.270   4
  15  -7  -7 45.7669 364.877   4
 -15   7   7-657.207 790.839   1
  14  -7  -7 462.123 464.744   4
 -14   7   7-123.828 622.750   1
  13  -7  -7 6237.35 1232.67   4
 -13   7   7 4434.25 1015.93   1
  12  -7  -7 140.226 434.428   4
 -12   7   7 774.196 541.728   1
  11  -7  -7-76.6301 401.471   4
 -11   7   7 24.9330 427.514   1
 -10   7   7 486.241 375.792   1
  10  -7  -7 512.340 454.640   4
  -9   7   7 3561.01 798.558   1
   9  -7  -7 5027.54 924.740   4
   8  -7  -7 500.203 437.869   4
  -8   7   7-204.519 378.138   1
  -7   7   7 4395.61 763.809   1
   7  -7  -7 4576.37 742.138   4
   6   7  -7 1697.04 356.449   1
   6  -7  -7 1574.76 419.557   4
  -6   7   7 1240.10 370.590   1
  -6  -7   7 1507.61 206.369   2
  -6  -7   7 1754.14 214.299   2
   5  -7  -7 16610.7 1170.81   4
   5  -7  -7 18441.3 1393.07   2
  -5   7   7 17445.1 1376.09   1
   5   7  -7 16287.6 958.827   1
   4   7  -7 8992.46 590.938   1
   4  -7  -7 9704.92 769.168   4
  -4   7   7 8918.28 981.567   1
   4  -7  -7 10321.0 1029.15   2
  -3   7   7 6706.77 802.802   1
   3  -7  -7 6490.68 513.765   4
   3  -7  -7 6244.76 798.780   2
   3   7  -7 5557.49 324.736   1
   2  -7  -7 3151.85 554.961   2
   1  -7  -7 1691.03 437.768   2
   0  -7  -7 535.575 285.012   2
  -1  -7  -7 3277.48 565.620   2
  -1   7  -7 2845.43 252.141   2
  -2  -7  -7 178.806 289.674   2
  -2   7  -7 176.358 132.385   2
  -3  -7  -7 319.490 333.684   2
  -4  -7  -7-193.104 289.038   2
  -5  -7  -7-85.6319 348.052   2
  -6  -7  -7 451.696 332.398   2
  -7  -7  -7 539.214 338.945   2
  -8  -7  -7 159.299 418.413   2
  -9  -7  -7 165.671 339.668   2
 -10  -7  -7 519.268 415.376   2
 -11  -7  -7 2382.36 749.862   2
  15  -8  -7 2234.64 956.567   4
 -15   8   7 4506.93 1087.04   1
  14  -8  -7 1229.80 657.977   4
 -14   8   7 1366.57 655.494   1
  13  -8  -7 4126.39 1039.21   4
 -13   8   7 6179.82 1209.19   1
  12  -8  -7 4435.48 1046.76   4
 -12   8   7 7358.38 1288.76   1
 -11   8   7 1535.11 637.697   1
  11  -8  -7 3062.61 756.311   4
 -10   8   7 5547.81 1002.11   1
  10  -8  -7 7708.07 1174.96   4
   9  -8  -7 16299.0 1607.19   4
  -9   8   7 19810.3 1752.74   1
  -8   8   7 34191.6 2269.28   1
   8  -8  -7 36199.7 2257.31   4
  -8  -8   7 37046.0 1619.70   2
   7  -8  -7 27604.5 1815.47   4
  -7   8   7 28309.7 1958.87   1
  -7  -8   7 27873.5 1150.24   2
   6   8  -7 98.5350 146.664   1
  -6  -8   7 159.115 56.4620   2
   6  -8  -7 303.245 226.069   4
  -6  -8   7 312.025 90.7639   2
  -6   8   7-54.6631 378.129   1
  -5   8   7 10748.1 1110.73   1
   5  -8  -7 11447.6 939.987   4
   5  -8  -7 13262.9 1224.56   2
   5   8  -7 11109.3 790.958   1
   4  -8  -7 34150.7 1512.77   4
  -4   8   7 33405.1 1983.22   1
   4  -8  -7 34695.2 2004.38   2
   4   8  -7 32864.6 1242.27   1
   3  -8  -7 26938.5 1719.80   2
  -3   8   7 25055.7 1679.80   1
   3   8  -7 24755.6 775.092   1
   2  -8  -7 17210.7 1354.59   2
   1  -8  -7 12152.2 1137.89   2
   0  -8  -7 10049.0 1042.61   2
  -1  -8  -7 321.666 229.638   2
  -1   8  -7 172.542 67.1885   2
  -1   8  -7 104.570 47.3232   2
  -2  -8  -7 11414.2 1158.09   2
  -2   8  -7 12082.8 685.659   2
  -3  -8  -7 18376.2 1509.68   2
  -4  -8  -7 15744.4 1442.76   2
  -5  -8  -7 1666.08 505.150   2
  -6  -8  -7-432.165 430.176   2
  -7  -8  -7 7806.66 1132.68   2
  -8  -8  -7 11726.1 1439.77   2
  -9  -8  -7 13253.0 1564.58   2
 -10  -8  -7 6056.30 1093.21   2
 -11  -8  -7-649.538 533.986   2
  15  -9  -7 1336.90 821.820   4
  14  -9  -7 1172.71 663.679   4
 -14   9   7-59.4711 640.590   1
  13  -9  -7 6888.56 1297.44   4
 -13   9   7 10001.7 1597.70   1
  12  -9  -7 26856.1 2434.52   4
 -12   9   7 36383.9 2794.46   1
  11  -9  -7 34146.0 2602.88   4
 -11   9   7 40489.9 2830.72   1
 -10   9   7 7378.75 1175.68   1
  10  -9  -7 9313.75 1267.98   4
 -10  -9   7 8968.68 922.551   2
   9  -9  -7 14.8343 310.023   4
  -9   9   7-55.7259 357.908   1
  -9  -9   7 326.856 255.847   2
  -8   9   7 12369.0 1332.55   1
   8  -9  -7 11089.9 1241.27   4
  -8  -9   7 12106.1 821.069   2
  -7  -9   7 54536.9 1636.38   2
   7  -9  -7 51161.8 2556.82   4
  -7   9   7 51722.7 2819.30   1
   6   9  -7 84175.8 2960.90   1
  -6   9   7 87013.3 3689.75   1
  -5   9   7 74260.7 3298.93   1
   5  -9  -7 76714.1 2755.42   4
   5   9  -7 79254.1 2518.69   1
   5  -9  -7 79567.9 3328.96   2
   4   9  -7 45944.5 1571.90   1
   4  -9  -7 48550.6 2479.36   2
  -4   9   7 48895.1 2528.06   1
   3   9  -7 8880.72 435.818   1
   3  -9  -7 10065.3 1094.42   2
   2  -9  -7 12284.4 1164.24   2
   1  -9  -7 71687.3 3057.06   2
   0  -9  -7 82249.8 3322.24   2
  -1  -9  -7 112338. 4065.44   2
  -2  -9  -7 44367.8 2440.26   2
  -3  -9  -7 3462.07 654.701   2
  -4  -9  -7 4265.53 839.051   2
  -5  -9  -7 30929.6 2162.50   2
  -6  -9  -7 43235.4 2635.73   2
  -7  -9  -7 17617.0 1727.44   2
  -8  -9  -7 3064.93 798.113   2
  -9  -9  -7 1031.77 517.675   2
 -10  -9  -7 11041.4 1527.39   2
 -11  -9  -7 17409.1 1953.93   2
  15 -10  -7 22408.4 2479.43   4
 -14  10   7 26097.6 2616.41   1
  14 -10  -7 24435.4 2525.71   4
  13 -10  -7 12936.0 1773.10   4
 -13  10   7 19298.5 2141.95   1
 -12  10   7 3819.43 1043.16   1
  12 -10  -7 2483.99 725.872   4
 -11  10   7 2604.27 740.738   1
  11 -10  -7 3735.65 853.828   4
  10 -10  -7 43362.3 2793.27   4
 -10  10   7 44476.8 2921.69   1
   9 -10  -7 52653.0 2949.17   4
  -9  10   7 54340.7 3107.22   1
  -8  10   7 46626.6 2786.27   1
   8 -10  -7 46886.8 2585.41   4
   7 -10  -7 33191.0 2003.78   4
  -7  10   7 33543.7 2263.23   1
  -6  10   7 488.632 454.641   1
   6 -10  -7 880.040 323.183   4
  -5  10   7 34827.3 2202.13   1
   5 -10  -7 34606.7 2182.33   2
   4 -10  -7 95382.7 3771.58   2
  -4  10   7 91633.4 3730.47   1
   3 -10  -7 121828. 4323.39   2
   3  10  -7 119370. 2681.26   1
   2 -10  -7 79923.3 3336.68   2
   1 -10  -7 38430.3 2210.16   2
   0 -10  -7-154.045 423.138   2
  -1 -10  -7 16809.1 1487.78   2
  -2 -10  -7 66364.5 3109.53   2
  -3 -10  -7 109491. 4247.95   2
  -4 -10  -7 90197.4 3860.51   2
  -5 -10  -7 46760.7 2755.88   2
  -6 -10  -7 1419.91 553.676   2
  -7 -10  -7 22396.0 1974.01   2
  -8 -10  -7 55406.0 3279.23   2
  -9 -10  -7 26013.5 2267.77   2
 -10 -10  -7 17984.8 1966.56   2
  15 -11  -7 1205.62 681.406   4
  14 -11  -7 5736.48 1212.68   4
 -14  11   7 6785.88 1428.28   1
  13 -11  -7 27548.3 2579.59   4
 -13  11   7 33193.6 2851.17   1
  12 -11  -7 31209.5 2666.80   4
 -12  11   7 37898.6 2925.75   1
  11 -11  -7 43872.0 2984.53   4
 -11  11   7 45430.5 3088.53   1
  10 -11  -7 26017.0 2146.84   4
 -10  11   7 24375.9 2171.68   1
   9 -11  -7 1015.28 480.309   4
  -9  11   7-466.377 546.091   1
  -8  11   7 19445.4 1831.60   1
   8 -11  -7 19610.6 1643.85   4
   7 -11  -7 70318.4 3067.33   4
  -7  11   7 76789.2 3630.82   1
  -6  11   7 139014. 5084.33   1
  -5  11   7 115449. 4456.90   1
   5 -11  -7 117005. 4478.52   2
   4 -11  -7 21990.1 1770.88   2
  -4  11   7 24851.3 1860.43   1
   3 -11  -7 2406.33 598.480   2
   2 -11  -7 4000.15 697.908   2
   1 -11  -7 26425.2 1873.18   2
   0 -11  -7 87530.1 3667.37   2
  -1 -11  -7 100215. 3983.82   2
  -2 -11  -7 58655.3 2968.72   2
  -3 -11  -7 2695.12 630.320   2
  -4 -11  -7 14615.4 1486.31   2
  -5 -11  -7 37343.1 2496.66   2
  -6 -11  -7 51503.5 3022.00   2
  -7 -11  -7 36253.6 2575.90   2
  -8 -11  -7 5916.25 1035.82   2
  -9 -11  -7 1485.14 537.910   2
 -10 -11  -7 13484.7 1707.42   2
  14 -12  -7 20116.9 2291.98   4
  13 -12  -7 8295.97 1423.02   4
 -13  12   7 10817.6 1672.70   1
 -12  12   7-87.4482 469.640   1
  12 -12  -7-507.620 520.357   4
 -11  12   7 1512.94 590.626   1
  11 -12  -7 2348.75 817.504   4
  10 -12  -7 25759.7 2148.70   4
 -10  12   7 29013.6 2407.64   1
  -9  12   7 51100.5 3115.49   1
   9 -12  -7 41729.7 2645.85   4
  -8  12   7 55583.4 3177.47   1
   8 -12  -7 49747.5 2709.16   4
  -7  12   7 17969.2 1749.18   1
  -6  12   7 1138.76 512.227   1
  -5  12   7 2814.42 699.724   1
   5 -12  -7 3059.35 735.940   2
   4 -12  -7 31533.3 2139.49   2
  -4  12   7 29642.6 2096.12   1
   3 -12  -7 69120.7 3286.10   2
   2 -12  -7 45542.0 2596.92   2
   1 -12  -7 10724.1 1222.76   2
   0 -12  -7-294.021 426.483   2
  -1 -12  -7 3029.86 664.319   2
  -2 -12  -7 19075.6 1685.66   2
  -3 -12  -7 43467.6 2620.62   2
  -4 -12  -7 29741.0 2196.94   2
  -5 -12  -7 13899.6 1509.20   2
  -6 -12  -7 557.460 313.144   2
  -7 -12  -7 17117.9 1771.63   2
  -8 -12  -7 39353.3 2860.81   2
  -9 -12  -7 37502.1 2879.70   2
  14 -13  -7 679.254 585.083   4
  13 -13  -7 4008.91 986.127   4
 -12  13   7 2588.20 838.666   1
  12 -13  -7 2656.54 858.190   4
 -11  13   7 3569.99 949.211   1
  11 -13  -7 1610.42 566.314   4
  10 -13  -7 6652.80 1109.40   4
 -10  13   7 7984.33 1310.82   1
  -9  13   7 3359.36 857.932   1
  -8  13   7 76.6498 342.634   1
  -7  13   7 4266.36 870.669   1
  -6  13   7 4061.00 848.474   1
  -5  13   7 8304.84 1164.46   1
   5 -13  -7 11251.8 1322.69   2
  -4  13   7 5546.32 920.006   1
   4 -13  -7 6245.95 1004.33   2
   3 -13  -7 668.319 341.592   2
   2 -13  -7 40201.6 2479.00   2
   1 -13  -7 59430.7 3075.50   2
   0 -13  -7 58304.8 3061.46   2
  -1 -13  -7 21510.1 1792.04   2
  -2 -13  -7 5652.24 983.570   2
  -3 -13  -7-534.571 474.815   2
  -4 -13  -7 3630.40 835.161   2
  -5 -13  -7 12498.9 1518.67   2
  -6 -13  -7 17250.7 1810.89   2
  -7 -13  -7 7099.03 1166.15   2
  -8 -13  -7 2203.64 785.633   2
  13 -14  -7 1090.92 610.961   4
  12 -14  -7 3581.30 899.949   4
 -11  14   7-128.961 533.165   1
 -10  14   7 40.2032 409.025   1
  -9  14   7 92.1592 448.786   1
  -8  14   7 1288.68 553.779   1
  -7  14   7-77.2100 466.696   1
  -6  14   7 226.677 340.646   1
  -5  14   7 883.028 435.816   1
   5 -14  -7 921.417 451.487   2
  -4  14   7-69.2835 469.478   1
   4 -14  -7-1588.12 583.603   2
   3 -14  -7 1521.39 543.938   2
   2 -14  -7 2038.76 612.691   2
   1 -14  -7 114.376 334.296   2
   0 -14  -7 1548.42 545.832   2
  -1 -14  -7 741.104 522.666   2
  -2 -14  -7-114.622 421.115   2
  -3 -14  -7 851.732 535.223   2
  -4 -14  -7 366.328 379.751   2
  -5 -14  -7 2362.98 629.912   2
  -6 -14  -7 1954.20 639.529   2
  -7 -14  -7 103.674 415.178   2
  -8 -14  -7-59.2727 413.718   2
 -11  15   7 7617.39 1351.21   1
 -10  15   7 2583.32 847.793   1
  -9  15   7 63.0373 410.615   1
  -8  15   7 1843.15 678.164   1
  -7  15   7 6788.91 1172.42   1
  -6  15   7 10214.9 1406.14   1
  -5  15   7 7882.89 1197.33   1
   5 -15  -7 9300.56 1293.70   2
  -4  15   7 2925.30 771.038   1
   4 -15  -7 2867.96 755.032   2
   3 -15  -7 125.995 337.861   2
   2 -15  -7 1794.86 587.015   2
   1 -15  -7 3692.56 802.221   2
   0 -15  -7 17696.4 1746.35   2
  -1 -15  -7 23736.1 2014.51   2
  -2 -15  -7 10164.9 1321.43   2
  -3 -15  -7-333.923 426.049   2
  -4 -15  -7 2975.29 791.384   2
  -5 -15  -7 5883.25 1123.61   2
  -6 -15  -7 4224.46 936.862   2
  -7 -15  -7 2644.25 773.329   2
  -9  16   7 29918.7 2621.19   1
  -8  16   7 33297.1 2692.12   1
  -7  16   7 17397.6 1871.31   1
  -6  16   7 2884.54 752.893   1
  -5  16   7 2564.13 664.102   1
   5 -16  -7 3593.98 861.859   2
   4 -16  -7 25678.1 2199.46   2
  -4  16   7 22294.6 2067.36   1
  -3  16   7 33329.6 2512.40   1
   3 -16  -7 33497.1 2521.38   2
   2 -16  -7 20931.5 1941.07   2
   1 -16  -7 22121.0 1978.63   2
   0 -16  -7 4998.40 845.098   2
  -1 -16  -7 5390.26 1030.78   2
  -2 -16  -7 30996.1 2431.11   2
  -3 -16  -7 32160.7 2482.03   2
  -4 -16  -7 20694.3 2012.85   2
  -5 -16  -7 6926.42 1221.62   2
  -6 -16  -7 100.323 362.250   2
  -8  17   7 8563.20 1417.29   1
  -7  17   7 19289.4 2051.58   1
  -6  17   7 25294.0 2333.16   1
  -5  17   7 24702.0 2223.74   1
   4 -17  -7 16734.7 1811.72   2
  -4  17   7 14628.9 1687.51   1
  -3  17   7 1838.60 680.893   1
   3 -17  -7 1208.31 455.478   2
   2 -17  -7 4327.79 870.531   2
   1 -17  -7 26758.0 2234.03   2
   0 -17  -7 40295.3 2809.28   2
  -1 -17  -7 27768.8 2357.99   2
  -2 -17  -7 9352.02 1359.32   2
  -3 -17  -7 1013.00 561.684   2
  -4 -17  -7 13972.2 1685.69   2
  -6  18   7-728.088 737.365   1
  -5  18   7 10919.6 1519.84   1
   4 -18  -7 29328.3 2476.38   2
  -4  18   7 28763.0 2479.82   1
  -3  18   7 48807.7 3239.43   1
   3 -18  -7 42511.6 2989.72   2
   2 -18  -7 44611.0 3037.55   2
   1 -18  -7 9007.47 1379.84   2
   0 -18  -7-307.719 517.420   2
  -1 -18  -7 6253.96 1142.82   2
  -2 -18  -7 24291.9 2267.36   2
  -3 -18  -7 42266.4 3027.43   2
   3 -19  -7 245.333 575.100   2
   2 -19  -7 2960.29 800.986   2
   1 -19  -7 25759.7 2317.59   2
   0 -19  -7 31997.9 2618.46   2
 -16   0   8 25573.0 2659.45   1
 -15   0   8 37084.5 3141.09   1
 -14   0   8 33523.3 2534.30   3
 -14   0   8 33416.3 2870.84   1
 -13   0   8 20349.4 1995.57   3
 -13   0   8 20744.7 2180.68   1
 -12   0   8 3443.88 968.665   1
 -12   0   8 2321.74 895.494   3
 -11   0   8 36080.0 2640.51   1
 -10   0   8 254962. 7854.49   1
  -9   0   8 330290. 9034.95   1
  -8   0   8 200347. 6150.94   1
  -7   0   8 34877.4 2067.23   1
  -6   0   8 158.012 223.403   2
  -6   0   8 184.562 269.034   1
  -5   0   8 30578.4 1683.68   1
  -5   0   8 32204.5 1501.09   2
  -4   0   8 150228. 3948.11   2
  -4   0   8 151122. 4225.24   1
  -3   0   8 104776. 3118.73   1
  -3   0   8 99686.5 2970.91   2
   3   0  -8 105382. 2979.06   2
  -2   0   8 172974. 4514.49   2
  -2   0   8 181441. 4493.87   1
   2   0  -8 186265. 4461.89   2
  -1   0   8 48169.1 1918.75   2
  -1   0   8 46286.9 1729.93   1
   1   0  -8 47829.3 1832.85   2
   0   0  -8 21045.4 1171.81   2
  -1   0  -8 14324.4 999.563   2
  -1   0  -8 14189.6 837.773   4
  -2   0  -8 113794. 3505.10   2
  -2   0  -8 115010. 3080.15   4
  -3   0  -8 73861.6 2765.75   2
  -3   0  -8 76845.1 2429.95   4
   3   0   8 79864.7 3760.44   3
  -4   0  -8 53086.9 2381.62   2
   4   0   8 57532.9 3045.90   3
  -5   0  -8 3665.40 655.916   2
   5   0   8 4876.22 832.057   3
  -6   0  -8 9958.05 1100.64   2
   6   0   8 9079.49 1087.77   3
  -7   0  -8 64963.6 3094.57   2
   7   0   8 69288.6 3072.11   3
  -8   0  -8 55743.7 2977.39   2
   8   0   8 61300.0 2758.91   3
  -9   0  -8 38670.2 2529.48   2
 -10   0  -8 23685.6 2098.67   2
 -11   0  -8 1468.07 677.272   2
 -12   0  -8 2927.01 944.472   2
 -16   1   8 8127.40 1547.26   1
 -16  -1   8 7913.71 1546.45   1
 -15   1   8 482.081 692.111   1
 -15  -1   8 479.652 470.178   1
 -14  -1   8 5534.26 1205.20   1
 -14   1   8 3932.60 1057.49   1
 -14   1   8 4422.89 997.256   3
 -14  -1   8 3660.36 853.256   3
 -13   1   8 20093.5 2006.37   3
 -13  -1   8 17442.1 1818.80   3
 -13  -1   8 21542.7 2221.95   1
 -13   1   8 19787.2 2106.64   1
 -12  -1   8 55243.8 3293.50   3
 -12  -1   8 52176.0 3387.39   1
 -12   1   8 51375.5 3292.59   1
 -11   1   8 43125.9 2849.33   1
 -11  -1   8 42780.2 2942.63   3
 -11  -1   8 41592.5 2862.44   1
 -10   1   8 26912.4 2174.82   1
 -10  -1   8 32656.2 2556.26   3
 -10  -1   8 28179.5 2233.63   1
  -9  -1   8 1564.44 738.651   1
  -9  -1   8 1804.24 960.072   3
  -9   1   8 2335.13 713.029   1
  -8  -1   8 23173.2 1826.79   1
  -8   1   8 23348.9 1814.67   1
  -7  -1   8 60388.3 2782.30   1
  -7   1   8 55626.0 2655.17   1
  -7  -1   8 53227.9 2128.26   2
  -6  -1   8 73521.9 2954.49   1
  -6   1   8 68985.7 2864.60   1
  -6  -1   8 66758.6 2305.31   2
  -5  -1   8 60443.5 2453.65   1
  -5   1   8 54262.3 2346.82   1
  -5   1   8 55340.6 2156.32   2
  -5  -1   8 56271.7 1985.71   2
  -4   1   8 8114.29 739.519   2
  -4   1   8 7716.85 775.821   1
  -4  -1   8 7789.36 642.576   2
  -4  -1   8 8399.33 781.480   1
  -3   1   8 16036.4 1035.18   2
  -3  -1   8 15539.3 891.521   2
  -3   1   8 14093.5 992.319   1
   3  -1  -8 15595.7 999.520   2
  -3  -1   8 14239.3 946.176   1
  -2   1   8 43828.4 1803.14   1
  -2  -1   8 44020.5 1664.18   1
  -2   1   8 43063.5 1825.35   2
  -2  -1   8 44457.5 1685.33   2
   2   1  -8 44550.2 1626.88   2
   2  -1  -8 46693.1 1831.98   2
  -1   1   8 110814. 3234.64   1
  -1   1   8 118989. 3489.91   2
  -1  -1   8 118756. 3287.46   2
  -1  -1   8 113749. 3008.94   1
   1   1  -8 113018. 3085.75   2
   1  -1  -8 116697. 3374.09   2
   0  -1   8 180805. 4246.71   1
   0  -1   8 185036. 6486.56   3
   0   1   8 189407. 4977.92   2
   0   1  -8 185303. 4510.17   2
   0  -1  -8 183683. 4766.71   2
  -1  -1  -8 163048. 4497.62   2
  -1   1  -8 167462. 4314.61   2
  -1  -1  -8 169166. 3833.37   4
   1  -1   8 170851. 6094.55   3
  -2  -1  -8 51283.6 2200.95   2
  -2   1  -8 51840.5 2082.69   2
  -2  -1  -8 53845.6 1709.76   4
  -2   1  -8 54713.7 1972.95   4
   2  -1   8 51018.7 3008.00   3
  -3  -1  -8 1294.18 359.824   2
  -3   1  -8 1473.73 389.481   2
  -3   1  -8 1505.99 333.487   4
  -4  -1  -8 21574.4 1493.50   2
  -4   1  -8 24769.1 1385.38   4
  -4   1  -8 22905.0 1460.73   2
   4  -1   8 25011.7 1924.12   3
  -5  -1  -8 66487.8 2946.99   2
  -5   1  -8 72387.3 2939.47   2
   5   1   8 75250.8 3494.85   3
   5  -1   8 78459.4 3465.00   3
  -6  -1  -8 63810.2 2962.48   2
  -6   1  -8 64463.9 2884.97   2
   6   1   8 65794.7 3146.57   3
   6  -1   8 67813.4 3115.73   3
  -7  -1  -8 32133.6 2115.76   2
  -7   1  -8 33092.2 2116.59   2
   7   1   8 33649.0 2093.17   3
   7  -1   8 34159.3 2076.72   3
  -8  -1  -8 5348.32 909.832   2
  -8   1  -8 4463.73 829.013   2
   8   1   8 4633.88 696.184   3
  -9  -1  -8 807.544 441.973   2
  -9   1  -8 645.616 349.785   2
 -10  -1  -8 15726.4 1679.71   2
 -10   1  -8 15311.3 1660.61   2
 -11  -1  -8 58341.2 3447.31   2
 -11   1  -8 57320.5 3414.48   2
 -12  -1  -8 22414.8 2183.70   2
 -12   1  -8 21882.4 2203.41   2
 -17  -2   8 1912.34 954.066   1
 -16   2   8 6981.80 1473.15   1
 -16  -2   8 7979.46 1480.69   1
 -15   2   8 7695.99 1495.20   1
 -15  -2   8 8582.36 1494.58   1
 -14   2   8 15335.6 1909.71   1
 -14  -2   8 16676.8 1710.93   3
 -14  -2   8 16037.8 1987.27   1
 -13  -2   8 12806.8 1654.56   1
 -13   2   8 13192.4 1718.09   1
 -13  -2   8 12042.7 1487.01   3
 -12  -2   8 1972.92 753.079   1
 -12   2   8 3303.05 908.088   1
 -12  -2   8 2696.94 763.162   3
 -11  -2   8 633.685 433.031   1
 -11   2   8 1090.16 540.225   1
 -11  -2   8 897.363 460.640   3
 -10   2   8 14267.7 1544.04   1
 -10  -2   8 16083.1 1788.61   3
 -10  -2   8 15172.2 1592.87   1
  -9   2   8 45291.2 2673.76   1
  -9  -2   8 41533.2 2959.80   3
  -9  -2   8 43546.8 2660.39   1
  -8   2   8 37132.0 2297.97   1
  -8  -2   8 37197.0 2776.11   3
  -8  -2   8 42441.6 2474.91   1
  -7   2   8 73.1532 269.513   1
  -7  -2   8 1232.07 543.755   1
  -7  -2   8 682.853 206.878   2
   6   2  -8 16656.7 1122.87   1
  -6  -2   8 19107.0 1420.13   1
  -6  -2   8 15734.3 1841.16   3
  -6   2   8 15920.9 1284.22   1
  -6  -2   8 16970.0 978.810   2
  -5   2   8 51790.8 2302.06   1
  -5  -2   8 55998.9 2374.85   1
  -5  -2   8 51428.3 3283.76   3
  -5  -2   8 52740.0 1814.96   2
  -4  -2   8 69933.0 2115.64   2
  -4  -2   8 75485.5 2637.45   1
  -4   2   8 70500.8 2646.80   1
   4  -2  -8 74106.9 2594.47   2
  -3  -2   8 40026.2 1452.68   2
  -3  -2   8 36752.8 2723.92   3
  -3  -2   8 39946.5 1669.00   1
   3  -2  -8 39692.4 1776.02   2
  -3   2   8 41756.5 1861.56   1
  -2  -2   8 18517.1 1871.91   3
  -2  -2   8 18363.0 965.191   2
  -2   2   8 19700.7 1185.92   1
   2   2  -8 18862.0 907.387   2
  -2  -2   8 19462.8 990.229   1
   2  -2  -8 19342.9 1179.68   2
  -1  -2   8 9591.63 613.288   1
  -1  -2   8 9839.75 1364.17   3
   1   2  -8 9812.79 660.411   2
   1  -2  -8 8736.01 802.617   2
   0   2  -8 775.235 233.262   2
   0  -2  -8 676.070 296.678   2
   0  -2   8 1266.73 632.140   3
   0  -2   8 648.147 156.722   1
  -1  -2  -8 30884.4 1619.83   2
  -1   2  -8 28082.3 1317.12   2
  -1  -2  -8 28845.6 976.358   4
  -2  -2  -8 40973.0 1978.78   2
  -2   2  -8 43849.7 1807.35   2
  -2   2  -8 42913.8 1806.89   4
   2  -2   8 45319.7 2728.79   3
  -3  -2  -8 41690.8 2083.29   2
  -3   2  -8 42676.6 1883.75   2
  -3   2  -8 40436.5 1812.41   4
   3  -2   8 43352.7 2641.05   3
   3  -2   8 47053.3 1899.44   1
  -4  -2  -8 31876.2 1863.04   2
  -4   2  -8 32826.0 1730.15   2
   4  -2   8 32627.4 2214.04   3
   4  -2   8 34247.0 1775.42   1
  -5  -2  -8-156.854 341.256   2
  -5   2  -8 111.512 261.153   2
   5  -2   8 198.024 415.699   3
  -6  -2  -8 14029.3 1329.20   2
  -6   2  -8 13626.2 1231.77   2
   6   2   8 15601.6 1492.24   3
   6  -2   8 15151.9 1398.29   3
  -7  -2  -8 14792.1 1436.52   2
  -7   2  -8 11430.2 1178.35   2
   7   2   8 11794.7 1247.52   3
  -8  -2  -8 16220.0 1551.44   2
  -8   2  -8 14796.8 1464.72   2
  -9  -2  -8 20604.6 1845.60   2
  -9   2  -8 18252.4 1741.91   2
 -10  -2  -8 7851.95 1189.18   2
 -10   2  -8 9881.04 1321.98   2
 -11  -2  -8-107.610 454.638   2
 -11   2  -8-136.197 334.225   2
 -12  -2  -8 2638.75 839.123   2
 -12   2  -8 3161.93 874.797   2
 -13   2  -8 3710.87 984.788   2
 -16   3   8-811.347 774.946   1
 -16  -3   8-626.374 581.416   1
 -15   3   8 358.665 536.979   1
 -15  -3   8 509.147 414.967   1
 -14   3   8 396.025 652.851   1
 -14  -3   8-760.822 725.517   3
 -14  -3   8 202.278 433.017   1
 -13   3   8 515.958 407.603   1
 -13  -3   8 423.596 569.332   3
 -13  -3   8 767.178 496.108   1
 -12   3   8 3440.15 867.512   1
 -12  -3   8 1801.46 618.910   3
 -12  -3   8 2397.71 762.489   1
 -11  -3   8 1081.22 529.700   1
 -11  -3   8 1593.65 593.983   3
 -11   3   8 1521.20 601.930   1
 -10  -3   8-260.929 386.092   1
 -10  -3   8-596.624 558.156   3
 -10   3   8-242.187 406.580   1
  -9  -3   8 1043.67 515.480   1
  -9  -3   8 1773.64 607.536   3
  -9   3   8 646.699 388.270   1
  -8   3   8 5652.15 885.972   1
  -8  -3   8 6215.24 941.525   1
  -8  -3   8 5662.61 1130.67   3
  -8  -3   8 5237.46 588.439   2
  -7  -3   8 2603.30 590.665   1
  -7   3   8 2970.74 591.441   1
  -7  -3   8 2483.97 716.293   3
  -7  -3   8 3178.75 420.119   2
  -6  -3   8 104.030 266.009   1
  -6  -3   8 305.433 429.951   3
   6   3  -8 435.469 210.421   1
  -6   3   8-324.869 312.742   1
  -6  -3   8 202.719 163.054   2
  -5   3   8 2510.89 518.842   1
  -5  -3   8 2460.67 308.886   2
  -5  -3   8 2055.97 475.683   1
  -5  -3   8 2708.41 823.952   3
  -4  -3   8 3827.50 360.392   2
  -4  -3   8 3720.13 552.884   1
  -4  -3   8 3315.61 866.747   3
  -4   3   8 3029.26 539.598   1
   4  -3  -8 2997.47 525.352   2
  -3  -3   8 113.749 167.241   1
  -3  -3   8 227.766 456.456   3
  -3  -3   8 281.156 125.767   2
   3  -3  -8 63.7692 207.202   2
  -3   3   8 110.985 215.262   1
  -2   3   8 1579.00 351.665   1
  -2  -3   8 1908.23 635.106   3
  -2  -3   8 1901.58 299.324   1
   2  -3  -8 1786.33 379.421   2
  -1  -3   8 13596.9 1551.04   3
  -1  -3   8 13010.0 674.275   1
   1   3  -8 14875.0 723.301   2
   1  -3  -8 12999.3 1024.67   2
   0  -3   8 8056.24 455.326   1
   0  -3   8 9133.51 1258.03   3
   0   3  -8 8691.48 596.029   2
   0  -3  -8 9361.38 882.796   2
  -1  -3  -8 1637.39 425.465   2
  -1   3  -8 2136.04 329.568   2
   1  -3   8 1769.23 205.542   1
   1  -3   8 2747.24 640.497   3
   1  -3   8 1572.84 244.972   1
   2  -3   8 82.4885 136.812   1
  -2   3  -8 176.057 197.016   2
  -2  -3  -8 4.48044 229.612   2
   2  -3   8-240.051 435.380   3
   3  -3   8 1475.82 312.297   1
  -3  -3  -8 1623.02 455.193   2
  -3   3  -8 1710.31 368.285   2
   3  -3   8 1483.20 473.319   3
  -4  -3  -8 414.134 338.351   2
  -4   3  -8 279.815 229.778   2
   4  -3   8 207.329 333.980   3
  -5  -3  -8 702.510 310.065   2
  -5   3  -8 204.983 204.293   2
   5  -3   8 89.3717 475.253   3
  -6  -3  -8 3990.47 765.885   2
  -6   3  -8 4045.66 658.437   2
   7   3   8 1641.33 527.638   3
  -7  -3  -8 1635.86 544.532   2
  -7   3  -8 2452.55 620.553   2
  -8  -3  -8 1523.57 576.439   2
  -8   3  -8 802.353 419.921   2
  -9  -3  -8-211.044 404.994   2
  -9   3  -8-556.405 409.756   2
 -10  -3  -8 3877.03 811.994   2
 -10   3  -8 4587.62 925.889   2
 -11  -3  -8 723.555 498.056   2
 -11   3  -8 1710.98 716.744   2
 -12  -3  -8 529.933 399.704   2
 -12   3  -8 1997.03 768.804   2
 -13   3  -8-190.293 590.227   2
 -16   4   8 2826.24 895.297   1
  16  -4  -8 4263.45 1294.82   4
  15  -4  -8 1762.50 812.250   4
 -15   4   8 932.416 581.831   1
 -14   4   8 450.700 616.771   1
 -14  -4   8 171.712 539.559   1
 -13  -4   8 64.6522 355.735   3
 -13  -4   8-136.092 509.965   1
 -12   4   8-45.3524 399.945   1
 -12  -4   8-168.206 512.686   3
 -12  -4   8-765.837 706.473   1
 -11  -4   8-28.5028 541.536   3
 -11   4   8 973.352 544.132   1
 -11  -4   8 52.2700 462.500   1
 -10  -4   8 1848.50 522.068   3
 -10   4   8 1984.30 691.342   1
 -10  -4   8 2194.37 642.060   1
  -9   4   8 11589.2 1306.57   1
  -9  -4   8 11057.7 1413.56   3
  -9  -4   8 12087.7 1389.99   1
  -8  -4   8 33884.1 2581.86   3
  -8   4   8 31593.5 2093.10   1
  -8  -4   8 29282.9 1420.28   2
  -8  -4   8 31639.6 2120.38   1
  -7  -4   8 3563.11 667.739   1
  -7   4   8 3384.54 659.000   1
  -7  -4   8 2851.30 884.809   3
  -7  -4   8 3839.79 442.065   2
  -6  -4   8 1517.42 247.273   2
  -6  -4   8 1391.26 431.703   1
  -6  -4   8 1711.86 697.792   3
  -6   4   8 2073.91 477.608   1
   6   4  -8 1441.92 332.861   1
  -5  -4   8 140.318 253.581   1
  -5  -4   8 252.914 122.305   2
  -5   4   8 360.156 246.332   1
  -5  -4   8 136.967 511.539   3
   5   4  -8-3.45889 169.450   1
  -4  -4   8 12918.7 593.433   2
  -4  -4   8 9961.73 1367.05   3
   4  -4  -8 13314.7 1070.69   2
  -4   4   8 12383.6 1079.39   1
  -4  -4   8 11821.1 916.463   1
  -3  -4   8 41.4583 126.159   1
  -3   4   8-54.4165 211.348   1
  -3  -4   8-155.912 389.185   3
   3  -4  -8 4.07970 216.664   2
  -2   4   8 11119.5 955.337   1
  -2  -4   8 8500.33 1294.24   3
   2  -4  -8 9235.50 901.814   2
  -2  -4   8 8445.26 527.253   1
  -1  -4   8 1006.67 479.566   3
   1   4  -8 1021.00 159.171   2
   1  -4  -8 1369.32 393.076   2
   0  -4  -8 4412.39 620.815   2
   0  -4   8 4154.26 830.802   3
   0   4  -8 4259.62 368.191   2
  -1  -4  -8 149.588 276.076   2
  -1   4  -8 313.120 141.051   2
   1  -4   8 203.714 315.682   3
  -2  -4  -8 304.014 198.857   2
  -2   4  -8 129.814 177.194   2
   2  -4   8 84.5413 301.787   3
   2  -4   8-15.0342 45.8518   1
   2  -4   8 145.220 80.8119   1
  -3  -4  -8 393.533 286.823   2
  -3   4  -8 404.697 160.686   2
   3  -4   8-94.8144 397.564   3
   3  -4   8 430.644 166.281   1
  -4  -4  -8 3299.43 598.290   2
  -4   4  -8 4486.39 608.787   2
   4  -4   8 3689.39 700.182   3
  -5  -4  -8 355.081 412.863   2
  -5   4  -8 730.662 332.415   2
  -6  -4  -8 267.851 375.477   2
  -6   4  -8-206.770 280.080   2
  -7  -4  -8 389.440 341.578   2
  -7   4  -8 326.847 379.186   2
  -8  -4  -8-409.771 504.638   2
  -8   4  -8-81.9067 381.805   2
  -9  -4  -8 1205.88 496.417   2
  -9   4  -8 958.834 547.436   2
 -10  -4  -8 783.659 450.921   2
 -10   4  -8 1474.08 626.846   2
 -11  -4  -8 1773.74 648.147   2
 -11   4  -8 1083.36 546.532   2
 -12  -4  -8 1619.06 633.156   2
 -12   4  -8 1851.30 503.445   2
 -13   4  -8-154.930 499.530   2
  16  -5  -8 806.723 773.777   4
  15  -5  -8-42.7038 458.937   4
 -15   5   8-611.355 865.667   1
  14  -5  -8 2321.40 880.707   4
 -14   5   8 2583.82 800.523   1
  13  -5  -8 10817.4 1650.56   4
 -13   5   8 6759.09 1247.81   1
  12  -5  -8 31088.7 2641.76   4
 -12   5   8 29362.5 2439.81   1
 -12  -5   8 29080.7 2365.68   3
 -12  -5   8 27834.1 2418.92   1
 -11   5   8 24122.2 2125.43   1
 -11  -5   8 23296.2 2088.57   3
 -11  -5   8 23228.4 2088.11   1
 -10   5   8 20718.6 1869.07   1
 -10  -5   8 19462.2 1906.57   3
 -10  -5   8 18768.8 1767.55   1
  -9   5   8 1543.64 527.237   1
  -9  -5   8 455.500 379.081   3
  -9  -5   8 2209.88 590.453   1
  -8  -5   8 26018.0 2242.33   3
  -8   5   8 29240.6 2010.05   1
  -7  -5   8 45971.3 3071.24   3
  -7  -5   8 45172.5 2393.73   1
  -7  -5   8 52122.7 1707.48   2
  -7   5   8 51314.9 2623.53   1
  -6   5   8 52799.7 2560.35   1
  -6  -5   8 54567.0 3301.61   3
   6   5  -8 51517.3 2009.35   1
  -6  -5   8 53170.1 1544.95   2
  -5  -5   8 47540.5 1244.24   2
  -5  -5   8 44444.2 2952.01   3
  -5   5   8 49320.7 2385.15   1
   5   5  -8 46202.1 1697.96   1
  -5  -5   8 43123.0 1968.31   1
  -4   5   8 20786.5 1469.42   1
   4  -5  -8 24762.0 1376.08   4
  -4  -5   8 21803.8 2002.01   3
  -4  -5   8 24284.3 1208.00   1
   4  -5  -8 23152.2 1518.65   2
   3  -5  -8 1889.51 337.383   4
  -3  -5   8 1855.32 612.393   3
  -3   5   8 1773.08 421.736   1
   3  -5  -8 2359.99 518.748   2
   2  -5  -8 3993.57 323.742   4
  -2  -5   8 4581.46 890.828   3
   2  -5  -8 3155.63 537.082   2
  -1  -5   8 11408.6 1410.04   3
   1  -5  -8 10368.3 975.444   2
   0  -5   8 15441.5 1612.55   3
   0   5  -8 18177.3 706.369   2
   0  -5  -8 15508.3 1224.92   2
  -1   5  -8 29920.5 1144.05   2
   1  -5   8 32336.2 2318.02   3
  -1  -5  -8 34405.7 1893.46   2
  -2  -5  -8 5082.62 772.891   2
  -2   5  -8 3419.01 415.603   2
   2  -5   8 3756.05 821.232   3
  -3  -5  -8 261.163 257.489   2
  -3   5  -8 406.541 227.070   2
  -4  -5  -8 10825.1 1141.60   2
  -4   5  -8 10066.9 879.151   2
  -5  -5  -8 60164.8 2918.33   2
  -5   5  -8 58443.9 2509.57   2
  -6  -5  -8 43806.6 2547.37   2
  -6   5  -8 45292.6 2290.18   2
  -7  -5  -8 7975.03 1079.51   2
  -7   5  -8 8210.38 993.269   2
  -8  -5  -8-167.121 435.757   2
  -8   5  -8-145.591 270.580   2
  -9  -5  -8 988.787 423.480   2
  -9   5  -8 1244.53 418.603   2
 -10  -5  -8 4006.76 917.688   2
 -11  -5  -8 15136.8 1794.65   2
 -13   5  -8 1860.86 670.436   2
  16  -6  -8 22449.1 2560.40   4
 -15   6   8 26036.1 2653.33   1
  15  -6  -8 27995.8 2801.80   4
 -14   6   8 24727.2 2465.18   1
  14  -6  -8 29966.4 2792.12   4
 -13   6   8 13815.3 1793.91   1
  13  -6  -8 14932.0 1908.01   4
  12  -6  -8 2603.14 798.058   4
 -12   6   8 3377.35 964.784   1
  11  -6  -8 4949.57 1065.92   4
 -11   6   8 8590.14 1307.64   1
  10  -6  -8 44719.9 2926.40   4
 -10  -6   8 54307.7 3269.35   3
 -10   6   8 48023.3 2950.36   1
  -9  -6   8 90700.9 4337.07   3
  -9   6   8 84855.6 3815.02   1
   8  -6  -8 55643.9 2960.00   4
  -8  -6   8 57674.5 3438.76   3
  -8   6   8 63751.0 3108.33   1
   7  -6  -8 4499.61 798.732   4
  -7  -6   8 4271.70 974.013   3
  -7   6   8 4336.45 714.287   1
  -6  -6   8 1601.77 196.131   2
  -6   6   8 973.159 361.639   1
   6  -6  -8 2135.82 572.842   4
   6   6  -8 1695.96 349.718   1
   5   6  -8 29305.7 1267.21   1
   5  -6  -8 31285.3 1685.74   4
  -5  -6   8 30271.2 2414.58   3
   5  -6  -8 34733.0 1950.56   2
  -5   6   8 32628.8 1953.41   1
  -4   6   8 103356. 3696.98   1
   4  -6  -8 103376. 3100.72   4
   4  -6  -8 108075. 3701.14   2
   3  -6  -8 50310.9 1636.79   4
  -3  -6   8 45640.6 3004.29   3
   3  -6  -8 49425.0 2324.51   2
  -3   6   8 49181.9 2333.71   1
  -2  -6   8 28013.4 2248.65   3
   2  -6  -8 28482.5 1726.15   2
  -1  -6   8 5499.48 947.473   3
   1  -6  -8 6823.68 832.920   2
   0  -6  -8 1121.89 392.771   2
   0  -6   8 1198.36 474.809   3
  -1   6  -8 41617.8 1302.29   2
  -1  -6  -8 44235.3 2262.29   2
  -2  -6  -8 100361. 3753.60   2
  -2   6  -8 102245. 2733.99   2
  -3  -6  -8 97055.0 3698.40   2
  -3   6  -8 94511.4 2845.71   2
  -4  -6  -8 63668.7 3038.07   2
  -4   6  -8 67724.2 2458.67   2
  -5  -6  -8 7229.32 1019.89   2
  -5   6  -8 7403.48 799.691   2
  -6  -6  -8 1923.17 553.877   2
  -6   6  -8 1058.98 410.501   2
  -7  -6  -8 32606.2 2271.58   2
  -7   6  -8 31359.8 1952.08   2
  -8  -6  -8 38435.5 2582.60   2
  -9  -6  -8 39267.4 2724.80   2
 -10  -6  -8 27214.4 2343.99   2
 -11  -6  -8 2395.77 772.594   2
  15  -7  -8 125.875 577.493   4
 -15   7   8-1989.02 877.409   1
  14  -7  -8 5059.48 1174.56   4
 -14   7   8 6740.67 1329.74   1
  13  -7  -8 24010.1 2409.97   4
 -13   7   8 26541.9 2455.46   1
  12  -7  -8 46298.6 3240.00   4
 -12   7   8 55562.2 3454.78   1
  11  -7  -8 47412.3 3223.58   4
 -11   7   8 60304.2 3476.50   1
  10  -7  -8 21919.8 2025.40   4
 -10   7   8 24771.5 2086.91   1
   9  -7  -8-14.6890 313.740   4
  -9   7   8 15.4902 378.875   1
   8  -7  -8 35879.0 2322.64   4
  -8   7   8 36600.0 2361.34   1
  -7   7   8 106330. 4144.05   1
   7  -7  -8 101536. 3881.22   4
   6  -7  -8 123672. 4027.64   4
   6   7  -8 118964. 3409.31   1
  -6   7   8 120515. 4372.78   1
   5  -7  -8 81826.3 2854.26   4
  -5  -7   8 74814.3 3977.00   3
   5  -7  -8 88703.2 3421.13   2
   5   7  -8 80102.7 2354.26   1
  -5   7   8 81786.0 3398.89   1
   4  -7  -8 11883.7 829.985   4
  -4   7   8 10439.2 1082.89   1
   4  -7  -8 13468.7 1222.35   2
   3  -7  -8 1038.39 195.176   4
  -3   7   8 533.145 268.855   1
   3  -7  -8 1087.95 387.509   2
   2  -7  -8 19017.5 1434.05   2
   1  -7  -8 82661.5 3269.41   2
   0  -7  -8 114237. 3994.72   2
  -1   7  -8 79850.2 1883.69   2
  -1  -7  -8 79305.7 3259.49   2
  -2  -7  -8 12709.9 1232.55   2
  -2   7  -8 11185.8 675.545   2
  -3  -7  -8 12870.8 1298.17   2
  -3   7  -8 13621.0 866.065   2
  -4  -7  -8 87013.4 3661.86   2
  -4   7  -8 86339.3 2855.44   2
  -5  -7  -8 121664. 4640.57   2
  -5   7  -8 130071. 3987.60   2
  -6  -7  -8 81609.8 3753.95   2
  -7  -7  -8 32832.3 2330.30   2
  -8  -7  -8 3847.99 926.505   2
  -9  -7  -8 7613.02 1224.36   2
 -10  -7  -8 40481.6 2918.05   2
 -11  -7  -8 58991.5 3695.97   2
  15  -8  -8 15254.1 2072.56   4
 -14   8   8 20902.5 2306.83   1
  14  -8  -8 17972.9 2174.82   4
  13  -8  -8 14280.4 1867.44   4
 -13   8   8 17820.6 2053.76   1
  12  -8  -8 3160.98 1023.70   4
 -12   8   8 2840.22 892.921   1
 -11   8   8 2972.26 789.056   1
  11  -8  -8 2185.40 695.453   4
  10  -8  -8 21035.1 1940.66   4
 -10   8   8 27715.6 2238.27   1
   9  -8  -8 41058.9 2591.47   4
  -9   8   8 40950.8 2655.45   1
  -8   8   8 21582.4 1820.75   1
   8  -8  -8 20973.7 1686.27   4
  -7   8   8 6495.63 978.983   1
   7  -8  -8 6030.29 840.955   4
   6  -8  -8 11937.7 1056.05   4
  -6   8   8 10086.9 1158.34   1
   5  -8  -8 46698.4 2003.06   4
   5  -8  -8 49252.8 2561.34   2
  -5   8   8 46734.5 2517.99   1
   4  -8  -8 70108.3 2272.24   4
  -4   8   8 68108.9 3051.39   1
   4  -8  -8 71780.1 3103.43   2
  -3   8   8 102694. 3895.81   1
   3  -8  -8 107586. 3923.85   2
   2  -8  -8 43976.4 2329.31   2
   1  -8  -8 8668.09 984.447   2
   0  -8  -8 13441.0 1263.28   2
  -1  -8  -8 44806.8 2415.24   2
  -2   8  -8 96376.6 2431.34   2
  -2  -8  -8 88376.6 3669.28   2
  -3  -8  -8 118791. 4455.21   2
  -3   8  -8 126859. 3323.14   2
  -4  -8  -8 74875.7 3423.53   2
  -4   8  -8 76778.6 2609.91   2
  -5  -8  -8 18736.9 1662.97   2
  -6  -8  -8 3882.60 818.563   2
  -7  -8  -8 31596.1 2334.25   2
  -8  -8  -8 45125.7 2911.27   2
  -9  -8  -8 43950.7 3001.62   2
 -10  -8  -8 22976.1 2205.93   2
  15  -9  -8 211.617 468.159   4
  14  -9  -8 2646.58 885.556   4
 -14   9   8 3356.12 1034.85   1
 -13   9   8 15592.9 1898.64   1
  13  -9  -8 12143.2 1705.95   4
  12  -9  -8 18674.9 2032.57   4
 -12   9   8 25307.8 2357.52   1
  11  -9  -8 21720.4 2060.43   4
 -11   9   8 24134.0 2213.00   1
 -10   9   8 3821.90 811.579   1
  10  -9  -8 5615.36 983.761   4
   9  -9  -8 872.051 376.349   4
  -9   9   8 8.36313 500.179   1
  -8   9   8 27218.6 2083.83   1
   8  -9  -8 28129.2 1950.69   4
   7  -9  -8 36681.4 2090.50   4
  -7   9   8 37623.4 2421.50   1
   6  -9  -8 31483.2 1759.09   4
  -6   9   8 31810.6 2152.38   1
  -5   9   8 26618.3 1910.21   1
   5  -9  -8 22707.8 1334.78   4
   5  -9  -8 26887.9 1882.75   2
  -4   9   8 5290.14 806.405   1
   4  -9  -8 5177.91 856.038   2
  -3   9   8-333.517 437.895   1
   3  -9  -8 177.444 317.179   2
   2  -9  -8 18822.2 1522.88   2
   1  -9  -8 37111.9 2210.44   2
   0  -9  -8 58316.2 2811.80   2
  -1  -9  -8 15625.9 1423.61   2
  -2  -9  -8-714.145 471.839   2
  -3  -9  -8 7569.33 1038.31   2
  -4  -9  -8 13246.4 1389.09   2
  -5  -9  -8 15735.0 1572.98   2
  -6  -9  -8 19325.1 1796.54   2
  -7  -9  -8 9901.17 1316.35   2
  -8  -9  -8 1429.75 528.428   2
  -9  -9  -8 1126.29 604.307   2
 -10  -9  -8 14141.6 1766.80   2
  15 -10  -8 1854.04 807.555   4
  14 -10  -8 1248.59 663.511   4
  13 -10  -8 57.4971 353.280   4
 -13  10   8 1677.47 747.848   1
 -12  10   8 651.003 485.065   1
  12 -10  -8 789.854 367.261   4
 -11  10   8 1764.12 673.637   1
[truncated: 99,010 more chars]
